# Supplementary material for: Neutral Genomic Microevolution of a Recently Emerged Pathogen, Salmonella enterica Serovar Agona
Source: PLoS Genet. 2013 Apr 18;9(4):e1003471. doi: 10.1371/journal.pgen.1003471 (PMC3630104; doi:10.1371/journal.pgen.1003471)
Supplement: Dataset S6 — CDSs that contains SNPs due to recombinations in the non-repetitive, non-mobile core genome of serovar Agona. (XLSX) [file pgen.1003471.s006.xlsx]

## Sheet: Dataset S6
Dataset S6. CDSs that contains SNPs due to recombinations in the non-repetitive, non-mobile core genome of serovar Agona
REC_ID	Founding event	Lineage	Start	End	Length	NS	S	NC	STOP	INS	DEL	Locus tag	Gene name	Product
REC001	Branch F	N02-73.H.09	161389	179675	18190	26	95	17	-	-	-	SeAg_B0153	secA	preprotein translocase, SecA subunit
												SeAg_B0154	-	mutator MutT protein
												SeAg_B0155	-	aldo-keto reductase yakc (NADP+)
												SeAg_B0156	-	transcriptional regulator, LysR family
												SeAg_B0157	-	zinc-binding protein YacG
												SeAg_B0158	-	conserved hypothetical protein
												SeAg_B0160	coaE	dephospho-CoA kinase
												SeAg_B0161	guaC	guanosine monophosphate reductase
												SeAg_B0162	-	protein transport protein HofC
												SeAg_B0163	-	protein transport protein HofB
												SeAg_B0164	-	prepilin peptidase dependent protein D
												SeAg_B0165	nadC	nicotinate-nucleotide diphosphorylase
												SeAg_B0166	-	N-acetyl-anhydromuramyl-L-alanine amidase
												SeAg_B0167	-	AmpE protein
												SeAg_B0168	-	alpha-N-arabinofuranosidase 2
												SeAg_B0170	-	Na+/galactoside symporter
												SeAg_B0169	-	hypothetical protein
												SeAg_B0171	-	aromatic amino acid transport protein AroP
												SeAg_B0172	-	hypothetical protein
												SeAg_B0173	-	transcriptional regulator, GntR family
												SeAg_B0174	aceE	pyruvate dehydrogenase (acetyl-transferring), homodimeric type
REC002	Branch F	N02-73.H.09	1489560	1500825	10914	17	77	14	1	-	-	SeAg_B1531	-	methyl-accepting chemotaxis protein III
												SeAg_B1532	-	LysR substrate binding domain protein
												SeAg_B1533	-	putative cytoplasmic protein
												SeAg_B1534	-	carboxylesterase, type B
												SeAg_B1535	-	glucans biosynthesis protein D
												SeAg_B1536	-	YceI family protein
												SeAg_B1537	-	putative GntR domain protein
												SeAg_B1538	-	L-idonate 5-dehydrogenase
												SeAg_B1539	-	probable glucarate transporter
REC003	Branch F	N02-73.H.09	1552676	1553539	760	-	5	4	-	1	-	SeAg_B1586	-	transcriptional regulator, TetR family
REC004	Branch F	N02-73.H.09	1558216	1566711	8019	3	32	22	-	-	-	SeAg_B1593	-	inner membrane protein YddG
												SeAg_B1594	fdnG	formate dehydrogenase, nitrate inducible, alpha subunit, selenocysteine-containing
												SeAg_B1596	fdnH	formate dehydrogenase, nitrate-inducible, iron-sulfur subunit
												SeAg_B1597	-	formate dehydrogenase, gamma subunit
												SeAg_B1598	-	alcohol dehydrogenase, propanol-preferring
												SeAg_B1599	-	NAD-dependent malic enzyme
REC005	Branch F	N02-73.H.09	1568952	1579234	9971	26	60	14	-	-	1	SeAg_B1604	-	conserved hypothetical protein
												SeAg_B1605	treZ	malto-oligosyltrehalose trehalohydrolase
												SeAg_B1606	treY	malto-oligosyltrehalose synthase
												SeAg_B1607	glgX	glycogen debranching enzyme GlgX
												SeAg_B1608	-	aminotransferase class I and II
												SeAg_B1609	nhaC	Na+/H+ antiporter NhaC
REC006	Branch F	N02-73.H.09	1676169	1676791	623	-	4	-	-	-	-	SeAg_B1708	-	protein YdgA
												SeAg_B1709	-	maltose regulon regulatory protein MalI
REC007	Branch F	N02-73.H.09	2384782	2384805	24	3	3	-	-	-	-	SeAg_B2454	-	ShdA
REC008	Branch F	N02-73.H.09	2398035	2399132	1001	-	4	-	-	-	-	SeAg_B2464	nuoE	NADH-quinone oxidoreductase, E subunit
												SeAg_B2465	nuoC	NADH-quinone oxidoreductase, C/D subunit
REC009	Branch F	N02-73.H.09	2883458	2903752	19925	45	121	16	-	-	-	SeAg_B2948	recA	protein RecA
												SeAg_B2949	-	competence/damage-inducible protein CinA domain protein
												SeAg_B2950	-	hypothetical protein
												SeAg_B2951	mltB	lytic murein transglycosylase B
												SeAg_B2952	-	glucitol/sorbitol permease iic component
												SeAg_B2953	-	glucitol/sorbitol-specific phosphotransferase enzyme iib component
												SeAg_B2954	-	glucitol/sorbitol-specific phosphotransferase enzyme iia component
												SeAg_B2955	srlD	sorbitol-6-phosphate 2-dehydrogenase
												SeAg_B2956	-	glucitol operon activator protein
												SeAg_B2957	srlR	glucitol operon repressor
												SeAg_B2958	gutQ	gutQ protein
												SeAg_B2959	-	anaerobic nitric oxide reductase transcription regulator NorR
												SeAg_B2960	-	anaerobic nitric oxide reductase flavorubredoxin
												SeAg_B2961	-	nitric oxide reductase FlRd-NAD
												SeAg_B2962	hypF	[NiFe] hydrogenase maturation protein HypF
												SeAg_B2963	-	protein AegA
												SeAg_B2964	-	conserved hypothetical protein
												SeAg_B2965	-	conserved hypothetical protein
												SeAg_B2966	hycI	hydrogenase maturation peptidase HycI
												SeAg_B2968	hycG	formate hydrogenlyase, subunit G
												SeAg_B2969	hycF	formate hydrogenlyase, subunit F
												SeAg_B2970	hycE	formate hydrogenlyase, subunit E
REC010	Branch F	N02-73.H.09	3027146	3029167	2016	-	9	-	-	-	-	SeAg_B3100	-	glycerate kinase 2
												SeAg_B3101	-	glucarate dehydratase
REC011	Branch F	N02-73.H.09	3039718	3047566	5397	-	22	-	-	-	-	SeAg_B3114	-	L-serine ammonia-lyase
												SeAg_B3116	fucO	lactaldehyde reductase
												SeAg_B3117	fucA	L-fuculose phosphate aldolase
												SeAg_B3120	fucP	L-fucose:H+ symporter permease
												SeAg_B3121	fucI	L-fucose isomerase
												SeAg_B3122	fucK	L-fuculokinase
REC012	Branch F	N02-73.H.09	3221553	3228808	7229	8	34	1	-	-	-	SeAg_B3313	-	glutathione S-transferase
												SeAg_B3314	-	molybdenum ABC transporter, periplasmic molybdate-binding protein
												SeAg_B3315	-	periplasmic binding protein
												SeAg_B3316	hypC	hydrogenase assembly chaperone HypC/HupF
												SeAg_B3318	-	hydrogenase-2 component protein
												SeAg_B3319	hybD	hydrogenase expression/formation protein
												SeAg_B3320	hybC	hydrogenase-2, large subunit
												SeAg_B3321	hybB	Ni/Fe-hydrogenase 2 b-type cytochrome subunit
												SeAg_B3322	hybA	hydrogenase-2 electron transfer subunit
REC013	Branch F	N02-73.H.09	3489400	3499603	10138	11	55	9	-	-	-	SeAg_B3597	aroE	shikimate 5-dehydrogenase
												SeAg_B3598	-	Sua5/YciO/YrdC/YwlC family protein
												SeAg_B3599	-	topoisomerase DNA-binding C4 zinc finger domain protein
												SeAg_B3600	smg	protein Smg
												SeAg_B3601	-	DNA protecting protein DprA
												SeAg_B3603	fmt	methionyl-tRNA formyltransferase
												SeAg_B3604	sun	ribosomal RNA small subunit methyltransferase B
												SeAg_B3605	-	Trk system potassium uptake protein TrkA
												SeAg_B3606	mscL	large conductance mechanosensitive channel protein
												SeAg_B3607	zntR	Zn(II)-responsive transcriptional regulator
												SeAg_B3608	-	conserved hypothetical protein
												SeAg_B3610	rpoA	DNA-directed RNA polymerase, alpha subunit
REC014	Branch F	N02-73.H.09	3527167	3529351	2117	6	27	7	-	-	-	SeAg_B3656	-	ABC transporter, ATP-binding protein
												SeAg_B3657	-	putative ATPase component of ABC transporter with duplicated ATPase domain
												SeAg_B3658	-	protein YdhR
												SeAg_B3659	-	alpha/beta hydrolase fold
REC015	Branch E	N02-N38	682	12060	11263	7	44	5	1	-	-	SeAg_B0002	thrA	aspartokinase/homoserine dehydrogenase I
												SeAg_B0003	thrB	homoserine kinase
												SeAg_B0004	thrC	threonine synthase
												SeAg_B0005	-	conserved hypothetical protein
												SeAg_B0006	-	amino-acid carrier protein AlsT
												SeAg_B0007	tal	transaldolase
												SeAg_B0008	mog	molybdopterin biosynthesis protein Mog
												SeAg_B0010	-	positive regulator for sigma H
												SeAg_B0011	-	protein YaaI
												SeAg_B0012	-	hypothetical protein
												SeAg_B0013	dnaK	chaperone protein DnaK
REC016	Branch E	N02-N38	113295	114003	622	-	-	5	-	-	-	SeAg_B0107	-	DNA polymerase II (Pol II)
REC017	Branch E	N02-N38	197882	199676	1633	1	11	1	-	-	-	SeAg_B0190	-	hypothetical protein
												SeAg_B0191	-	protein YacL
												SeAg_B0193	-	2-keto-3-deoxygluconate permease
												SeAg_B0194	-	putative inner membrane protein
REC018	Branch E	N02-N38	360798	430150	66108	111	409	95	-	5	2	SeAg_B0368	-	putative outer membrane protein
												SeAg_B0369	-	fimbrial chaperone protein
												SeAg_B0370	-	putative fimbrial usher
												SeAg_B0371	-	outer membrane fimbrial usher protein
												SeAg_B0372	-	fimbrial chaperone protein
												SeAg_B0373	-	fimbrial protein
												SeAg_B0374	-	putative transmembrane regulator
												SeAg_B0375	-	conserved hypothetical protein
												SeAg_B0376	-	cyclic diguanylate phosphodiesterase (EAL) domain protein
												SeAg_B0377	-	putative response regulator
												SeAg_B0378	-	putative inner membrane protein
												SeAg_B0379	-	attachment invasion locus protein
												SeAg_B0380	-	putative response regulator
												SeAg_B0381	-	conserved domain protein
												SeAg_B0382	-	cytochrome c type biogenesis protein CycH
												SeAg_B0383	-	outer membrane protein OprM
												SeAg_B0384	-	OqxB
												SeAg_B0385	-	putative auxiliary transport protein, membrane fusion protein (MFP) family
												SeAg_B0387	-	copper-translocating P-type ATPase
												SeAg_B0388	cueR	Cu(I)-responsive transcriptional regulator
												SeAg_B0389	-	conserved domain protein
												SeAg_B0390	-	conserved hypothetical protein
												SeAg_B0391	-	major facilitator superfamily MFS_1
												SeAg_B0392	-	type III restriction-modification system StyLTI enzyme mod
												SeAg_B0393	-	type III restriction-modification system StyLTI enzyme res
												SeAg_B0394	cioA	cyanide-insensitive oxidase CioA
												SeAg_B0395	cydB	cytochrome D ubiquinol oxidase, subunit II
												SeAg_B0397	-	AraC-family transcriptional regulator
												SeAg_B0398	-	ferrichrome-iron receptor
												SeAg_B0399	-	putative transport protein
												SeAg_B0401	prpR	propionate catabolism operon regulatory protein PrpR
												SeAg_B0402	prpB	methylisocitrate lyase
												SeAg_B0403	prpC	2-methylcitrate synthase
												SeAg_B0404	prpD	2-methylcitrate dehydratase
												SeAg_B0405	prpE	propionate--CoA ligase
												SeAg_B0406	hemB	delta-aminolevulinic acid dehydratase
												SeAg_B0407	-	hypothetical protein
												SeAg_B0408	-	hypothetical protein
												SeAg_B0409	-	putative autotransporter/pertactin
												SeAg_B0410	-	putative inner membrane protein
												SeAg_B0411	-	beta-lactamase
												SeAg_B0412	smbA	protein SbmA
												SeAg_B0413	-	putative outer membrane lipoprotein
												SeAg_B0414	-	inner membrane protein YaiY
												SeAg_B0415	-	conserved hypothetical protein
												SeAg_B0416	-	D-alanine--D-alanine ligase
												SeAg_B0417	-	extensin family protein
												SeAg_B0418	-	major facilitator superfamily MFS_1
												SeAg_B0421	-	AdrA protein
												SeAg_B0422	proC	pyrroline-5-carboxylate reductase
												SeAg_B0423	-	hypothetical protein
												SeAg_B0424	-	protein YaiI
												SeAg_B0425	aroK	shikimate kinase
												SeAg_B0426	-	conserved hypothetical protein
												SeAg_B0427	-	aro operon protein
												SeAg_B0428	-	protein YaiE
												SeAg_B0429	rdgC	recombination-associated exonuclease RdgC
												SeAg_B0430	-	N-acetyl-D-glucosamine kinase
												SeAg_B0431	-	protein AraJ
												SeAg_B0432	-	exonuclease SbcC
REC019	Branch E	N02-N38	603063	633196	29028	60	187	28	-	1	2	SeAg_B0609	-	probable pyridine nucleotide-disulfide oxidoreductase YkgC
												SeAg_B0610	-	conserved domain protein
												SeAg_B0611	-	conserved hypothetical protein
												SeAg_B0612	-	heat shock protein DnaJ domain protein
												SeAg_B0613	-	phenylalanine-specific permease
												SeAg_B0614	-	transporter, small conductance mechanosensitive ion channel
												SeAg_B0615	-	conserved hypothetical protein
												SeAg_B0616	-	lipase 1
												SeAg_B0617	-	oxygen-insensitive NAD
												SeAg_B0618	-	conserved hypothetical protein
												SeAg_B0621	-	putative inner membrane protein
												SeAg_B0622	-	carboxylate-amine ligase YbdK
												SeAg_B0623	-	4'-phosphopantetheinyl transferase EntD
												SeAg_B0624	-	ferrienterobactin receptor
												SeAg_B0625	-	enterochelin esterase
												SeAg_B0626	-	conserved domain protein
												SeAg_B0627	-	enterobactin synthetase component F
												SeAg_B0628	-	ferric enterobactin transport protein FepE
												SeAg_B0629	-	ferric enterobactin transport ATP-binding protein FepC
												SeAg_B0630	-	ferric enterobactin transport system permease protein FepG
												SeAg_B0631	-	ferric enterobactin transport system permease protein FepD
												SeAg_B0632	-	enterobactin exporter EntS
												SeAg_B0633	-	ABC superfamily
												SeAg_B0634	-	isochorismate synthase EntC
												SeAg_B0635	-	2,3-dihydroxybenzoate-AMP ligase
REC020	Branch E	N02-N38	754539	755262	722	1	3	7	-	-	1	SeAg_B0758	-	NIF3 family protein
REC021	Branch E	N02-N38	1458270	1473313	13992	39	97	14	-	-	-	SeAg_B1500	-	conserved hypothetical protein
												SeAg_B1501	-	multidrug transporter EmrE
												SeAg_B1502	-	universal stress protein F
												SeAg_B1505	nifJ	pyruvate:ferredoxin (flavodoxin) oxidoreductase
												SeAg_B1507	-	putative cytoplasmic protein
												SeAg_B1508	-	heat shock protein HslJ
												SeAg_B1509	-	D-lactate dehydrogenase
												SeAg_B1510	-	conserved hypothetical protein
												SeAg_B1511	-	conserved domain protein
												SeAg_B1512	-	YdbL
												SeAg_B1514	-	fmn-dependent NADH-azoreductase
												SeAg_B1515	hrpA	ATP-dependent helicase HrpA
REC022	Branch E	N02-N38	1711656	1732022	19701	72	141	18	-	1	-	SeAg_B1747	cfa	cyclopropane-fatty-acyl-phospholipid synthase
												SeAg_B1748	ribE	riboflavin synthase, alpha subunit
												SeAg_B1749	-	multidrug resistance protein NorM
												SeAg_B1752	-	secretion system apparatus protein SsaU
												SeAg_B1753	epaR	type III secretion apparatus protein SpaR/YscT/HrcT
												SeAg_B1754	epaP	type III secretion apparatus protein, YscR/HrcR family
												SeAg_B1755	epaO	type III secretion apparatus protein, YscQ/HrcQ family
												SeAg_B1756	-	secretion system apparatus protein SsaP
												SeAg_B1757	-	secretion system apparatus SsaO
												SeAg_B1758	-	type III secretion apparatus H+-transporting two-sector ATPase
												SeAg_B1759	-	secretion system apparatus SsaV
												SeAg_B1760	-	secretion system apparatus SsaM
												SeAg_B1761	-	secretion system apparatus protein SsaL
												SeAg_B1762	-	type III secretion apparatus protein, HrpE/YscL family
												SeAg_B1763	-	secretion system apparatus
												SeAg_B1764	-	type III secretion apparatus lipoprotein, YscJ/HrcJ family
												SeAg_B1765	-	type III secretion system apparatus protein
												SeAg_B1766	-	type III secretion system protein, SsaH family
												SeAg_B1767	eprI	type III secretion apparatus needle protein
												SeAg_B1768	-	secreted effector protein
												SeAg_B1769	-	secreted effector protein
												SeAg_B1771	-	secreted effector protein
												SeAg_B1772	-	translocation machinery component
												SeAg_B1773	-	translocation machinery component
												SeAg_B1774	-	type III secretion low calcium response chaperone LcrH/SycD
												SeAg_B1775	-	secretion system effector SseB
REC023	Branch E	N02-N38	1733727	1736975	3181	3	15	1	-	-	-	SeAg_B1777	-	type III secretion apparatus protein, YscD/HrpQ family
												SeAg_B1778	-	type III secretion outer membrane pore, YscC/HrcC family
												SeAg_B1779	-	secretion system regulator:Sensor component
REC024	Branch E	N02-N38	2979471	2987706	8138	5	50	2	-	-	-	SeAg_B3051	pcm	protein-L-isoaspartate O-methyltransferase
												SeAg_B3052	surE	5'/3'-nucleotidase SurE
												SeAg_B3053	truD	tRNA pseudouridine synthase D
												SeAg_B3054	ispF	2C-methyl-D-erythritol 2,4-cyclodiphosphate synthase
												SeAg_B3055	ispD	2-C-methyl-D-erythritol 4-phosphate cytidylyltransferase
												SeAg_B3056	ftsB	cell division protein FtsB
												SeAg_B3057	-	YgbE
												SeAg_B3058	cysC	adenylylsulfate kinase
												SeAg_B3059	-	sulfate adenylyltransferase subunit 1
												SeAg_B3060	cysD	sulfate adenylyltransferase, subunit 2
												SeAg_B3061	-	alkaline phosphatase isozyme conversion protein
REC025	Branch E	N02-N38	3020488	3020955	468	-	6	-	-	-	-	SeAg_B3097	relA	GTP diphosphokinase
REC026	Branch E	N02-N38	3024396	3040171	15693	12	84	6	-	-	-	SeAg_B3099	-	signal transduction histidine-protein kinase BarA
												SeAg_B3100	-	glycerate kinase 2
												SeAg_B3101	-	glucarate dehydratase
												SeAg_B3102	-	glucarate dehydratase
												SeAg_B3103	gudP	glucarate permease
												SeAg_B3105	-	flavodoxin
												SeAg_B3106	-	tRNA pseudouridine synthase C
												SeAg_B3107	-	conserved hypothetical protein
												SeAg_B3109	-	protein syd
												SeAg_B3110	queF	queuine synthase
												SeAg_B3111	-	lysine decarboxylase family protein
												SeAg_B3113	-	serine transporter family protein
												SeAg_B3114	-	L-serine ammonia-lyase
REC027	Branch E	N02-N38	3043434	3050212	6445	5	39	2	-	-	-	SeAg_B3117	fucA	L-fuculose phosphate aldolase
												SeAg_B3120	fucP	L-fucose:H+ symporter permease
												SeAg_B3121	fucI	L-fucose isomerase
												SeAg_B3122	fucK	L-fuculokinase
												SeAg_B3123	-	fuscose operon FucU protein
												SeAg_B3124	-	L-fucose operon activator
												SeAg_B3125	-	conserved hypothetical protein
REC028	Branch E	N02-N38	3971265	3973612	2348	1	12	1	-	1	-	SeAg_B4071	-	multidrug resistance protein MdtL
												SeAg_B4072	-	HTH-type transcriptional regulator YidZ
												SeAg_B4073	-	o252
												SeAg_B4074	-	YieF
REC029	Main Branch	N02-N03	138759	149286	10321	9	37	4	-	-	1	SeAg_B0132	ilvB	acetolactate synthase, large subunit, biosynthetic type
												SeAg_B0133	ilvH	acetolactate synthase, small subunit, isozyme III
												SeAg_B0134	-	hypothetical protein
												SeAg_B0135	fruR	fructose repressor
												SeAg_B0136	mraZ	mraZ protein
												SeAg_B0137	mraW	S-adenosyl-methyltransferase MraW
												SeAg_B0138	ftsL	cell division protein FtsL
												SeAg_B0139	ftsI	peptidoglycan synthetase FtsI
												SeAg_B0140	murE	UDP-N-acetylmuramoylalanyl-D-glutamate--2,6-diaminopimelate ligase
												SeAg_B0141	murF	UDP-N-acetylmuramoyl-tripeptide--D-alanyl-D-alanine ligase
												SeAg_B0142	mraY	phospho-N-acetylmuramoyl-pentapeptide-transferase
												SeAg_B0143	murD	UDP-N-acetylmuramoylalanine--D-glutamate ligase
REC030	Main Branch	N02-N03	219558	246076	24612	48	182	13	-	3	1	SeAg_B0214	panD	aspartate 1-decarboxylase
												SeAg_B0215	panC	pantoate--beta-alanine ligase
												SeAg_B0216	panB	3-methyl-2-oxobutanoate hydroxymethyltransferase
												SeAg_B0217	folK	2-amino-4-hydroxy-6-hydroxymethyldihydropteridine pyrophosphokinase
												SeAg_B0218	-	poly(A) polymerase (PAP) (Plasmid copy number protein)
												SeAg_B0219	-	glutamyl-Q tRNA
												SeAg_B0220	dksA	RNA polymerase-binding protein DksA
												SeAg_B0221	sfsA	sugar fermentation stimulation protein
												SeAg_B0222	-	2'-5' RNA ligase
												SeAg_B0223	hrpB	ATP-dependent helicase HrpB
												SeAg_B0225	mrcB	penicillin-binding protein 1B
												SeAg_B0226	-	hypothetical protein
												SeAg_B0227	fhuA	ferrichrome-iron receptor
												SeAg_B0228	fhuC	ferrichrome ABC transporter, ATP-binding protein
												SeAg_B0229	-	ferrichrome-binding periplasmic protein
												SeAg_B0230	-	ferrichrome transport system permease protein FhuB
												SeAg_B0232	-	putative fimbrial subunit
												SeAg_B0233	-	fimbrial usher protein
												SeAg_B0234	-	chaperone protein PapD
												SeAg_B0235	-	putative minor fimbrial subunit
												SeAg_B0236	-	fimbrial subunit
												SeAg_B0237	-	minor fimbrial subunit StfG
												SeAg_B0238	-	conserved hypothetical protein
												SeAg_B0239	hemL	glutamate-1-semialdehyde-2,1-aminomutase
REC031	Main Branch	N02-N03	907841	921079	12729	16	73	10	-	-	-	SeAg_B0916	potH	putrescine ABC transporter, permease protein PotH
												SeAg_B0917	potI	putrescine ABC transporter, permease protein PotI
												SeAg_B0918	-	putative membrane protein
												SeAg_B0919	rumB	23S rRNA (uracil-5-)-methyltransferase RumB
												SeAg_B0920	-	conserved hypothetical protein
												SeAg_B0921	-	ascorbate-specific PTS system enzyme IIC
												SeAg_B0922	-	putative inner membrane protein
												SeAg_B0923	-	sulfatase
												SeAg_B0924	artJ	arginine ABC transporter, periplasmic arginine-binding protein ArtJ
												SeAg_B0925	artM	arginine ABC transporter, permease protein ArtM
												SeAg_B0926	artQ	arginine ABC transporter, permease protein ArtQ
												SeAg_B0927	artI	arginine ABC transporter, periplasmic arginine-binding protein ArtI
												SeAg_B0928	artP	arginine ABC transporter, ATP-binding protein
												SeAg_B0931	-	N-acetylmuramoyl-L-alanine amidase AmiD
												SeAg_B0932	-	NAD dependent epimerase/dehydratase family
REC032	Main Branch	N02-N03	1948617	1950899	2183	1	14	-	-	-	-	SeAg_B2005	flgK	flagellar hook-associated protein FlgK
												SeAg_B2006	flgJ	flagellar rod assembly protein/muramidase FlgJ
												SeAg_B2007	flgI	flagellar P-ring protein FlgI
												SeAg_B2008	flgH	flagellar L-ring protein FlgH
REC033	Main Branch	N02-N03	2203364	2207634	3675	12	34	-	-	-	1	SeAg_B2286	-	ADP-ribosylglycohydrolase family protein
												SeAg_B2287	-	kinase, PfkB family
												SeAg_B2288	-	transcriptional regulator, GntR family
												SeAg_B2289	thiD	phosphomethylpyrimidine kinase
												SeAg_B2290	thiM	hydroxyethylthiazole kinase
												SeAg_B2292	-	hypothetical protein
REC034	Main Branch	N02-N03	2557482	2564230	5760	1	19	31	-	-	-	SeAg_B2626	-	protein YffB
												SeAg_B2627	dapE	succinyl-diaminopimelate desuccinylase
												SeAg_B2630	-	acetyltransferase
												SeAg_B2631	-	zinc protease
												SeAg_B2632	purC	phosphoribosylaminoimidazole-succinocarboxamide synthase
												SeAg_B2633	-	lipoprotein, NlpB/DapX family
REC035	Main Branch	N02-N03	3027188	3029425	2231	3	18	1	-	-	-	SeAg_B3100	-	glycerate kinase 2
												SeAg_B3101	-	glucarate dehydratase
												SeAg_B3102	-	glucarate dehydratase
REC036	Main Branch	N02-N03	3039640	3040180	541	-	6	-	-	-	-	SeAg_B3114	-	L-serine ammonia-lyase
REC037	Main Branch	N02-N03	3042614	3048171	5263	5	13	2	-	-	-	SeAg_B3116	fucO	lactaldehyde reductase
												SeAg_B3117	fucA	L-fuculose phosphate aldolase
												SeAg_B3119	-	hypothetical protein
												SeAg_B3120	fucP	L-fucose:H+ symporter permease
												SeAg_B3121	fucI	L-fucose isomerase
												SeAg_B3122	fucK	L-fuculokinase
REC038	Main Branch	N02-N03	3439659	3445881	5994	3	55	10	-	-	-	SeAg_B3546	-	L(+)-tartrate dehydratase subunit alpha (L-TTD alpha)
												SeAg_B3547	-	anion transporter
												SeAg_B3548	-	transcriptional regulator
												SeAg_B3549	-	putative GntR-family transcriptional regulator
												SeAg_B3550	mdh	malate dehydrogenase, NAD-dependent
												SeAg_B3551	argR	arginine repressor
												SeAg_B3552	-	protein YhcN
												SeAg_B3553	-	conserved hypothetical protein
												SeAg_B3554	-	barstar
REC039	Main Branch	N02-N03	4124166	4128183	3969	5	35	1	-	-	-	SeAg_B4228	-	thiol:disulfide interchange protein DsbA
												SeAg_B4229	-	1-acyl-sn-glycerol-3-phosphate acyltransferase
												SeAg_B4230	-	hypothetical protein
												SeAg_B4231	-	DNA polymerase I
REC040	Main Branch	N02-N03	4257013	4263663	6582	5	45	5	-	-	1	SeAg_B4361	argE	acetylornithine deacetylase
												SeAg_B4362	argC	N-acetyl-gamma-glutamyl-phosphate reductase
												SeAg_B4363	argB	acetylglutamate kinase
												SeAg_B4364	argH	argininosuccinate lyase
												SeAg_B4366	oxyR	hydrogen peroxide-inducible genes activator
												SeAg_B4367	sthA	soluble pyridine nucleotide transhydrogenase
REC041	Clade D	N05-N06	1116044	1116079	36	8	2	-	-	-	-	SeAg_B1114	-	type VI secretion system Vgr family protein
REC042	Strain 18.H.07	N17-18.H.07	599574	599763	189	3	36	-	-	-	-	SeAg_B0603	-	bactoprenol glucosyl transferase
