# Supplementary material for: Neutral Genomic Microevolution of a Recently Emerged Pathogen, Salmonella enterica Serovar Agona
Source: PLoS Genet. 2013 Apr 18;9(4):e1003471. doi: 10.1371/journal.pgen.1003471 (PMC3630104; doi:10.1371/journal.pgen.1003471)
Supplement: Dataset S7 — Accessory genes. (XLSX) [file pgen.1003471.s007.xlsx]

## Sheet: Dataset S7
Dataset S7. All the genes that are not shared by all 73 isolates of serovar Agona.
										Presence / Absence in strains *
Island / Plasmid ID	Locus tag	group	Product	Type	Conjugative element	Length (amino acids)	Name	order		01.O.05	02.O.05	03.O.05	04.O.05	05.O.06	06.O.05	07.O.05	08.A.05	09.F.08	10.A.05	11.A.05	12.A.06	13.E.05	14.E.05	15.H.03	16.H.08	17.H.06	18.H.07	19.F.03	20.H.06	21.H.10	22.H.04	23.F.01	24.H.04	25.O.03	26.F.98	27.O.98	28.O.08	29.O.08	30.H.04	31.H.09	32.A.00	33.A.05	34.H.09	35.H.08	36.H.00	37.F.02	38.O.03	39.O.03	40.E.08
GI1	SAPA_G0001	MC_08-0742.scaffold_C2539_orf00022	Site-specific recombinase, phage integrase family	Phage	-	388	-	342		0	0	0	0	0	0	0	0	0	0	0	0	1	1	0	0	1	1	0	1	0	0	0	1	0	0	0	0	0	0	0	0	0	0	0	0	0	0	0	0
GI1	SAPA_G0002	MC_05-0677.scaffold_scaffold25_orf00060	Eac protein	Phage	-	99	eac	343		0	0	0	0	0	0	0	0	0	0	0	0	1	1	0	0	1	0	0	1	0	0	0	1	0	0	0	0	0	0	0	0	0	0	0	0	0	0	0	0
GI1	SAPA_G0003	MC_08-0532.scaffold_scaffold51_orf00013	Eaa protein	Phage	-	229	-	344		0	0	0	0	0	0	0	0	0	0	0	0	0	0	0	0	0	0	0	1	0	0	0	0	0	0	0	0	0	0	0	0	0	0	0	0	0	0	0	0
GI1	SAPA_G0004	MC_08-0532.scaffold_scaffold51_orf00011	Phage protein	Phage	-	88	-	345		0	0	0	0	0	0	0	0	0	0	0	0	0	0	0	0	0	0	0	1	0	0	0	0	0	0	0	0	0	0	0	0	0	0	0	0	0	0	0	0
GI1	SAPA_G0005	MC_08-0532.scaffold_scaffold51_orf00010	Protein ea22	Phage	-	162	-	346		0	0	0	0	0	0	0	0	0	0	0	0	0	0	0	0	0	0	0	1	0	0	0	0	0	0	0	0	0	0	0	0	0	0	0	0	0	0	0	0
GI1	SAPA_G0006	MC_08-0532.scaffold_scaffold51_orf00009	Gp37	Phage	-	136	-	347		0	0	0	0	0	0	0	0	0	0	0	0	0	0	0	0	0	0	0	1	0	0	0	0	0	0	0	0	0	0	0	0	0	0	0	0	0	0	0	0
GI1	SAPA_G0007	SF_R0374_09.scaffold_scaffold27_orf00062	Phage related protein	Phage	-	95	-	348		0	0	0	0	0	0	0	0	0	0	0	0	0	0	0	0	0	1	0	0	0	0	0	1	0	0	0	0	0	0	0	0	0	0	0	0	0	0	0	0
GI1	SAPA_G0008	SF_R0374_09.scaffold_scaffold27_orf00061	ORF8	Phage	-	264	-	349		0	0	0	0	0	0	0	0	0	0	0	0	0	0	0	0	0	1	0	0	0	0	0	0	0	0	0	0	0	0	0	0	0	0	0	0	0	0	0	0
GI1	SAPA_G0009	SF_R0374_09.scaffold_scaffold27_orf00060	ORF9	Phage	-	170	eae	350		0	0	0	0	0	0	0	0	0	0	0	0	0	0	0	0	0	1	0	0	0	0	0	0	0	0	0	0	0	0	0	0	0	0	0	0	0	0	0	0
GI1	SAPA_G0010	MC_08-0532.scaffold_scaffold51_orf00008	Putative ABC transporter ATP-binding protein	Phage	-	99	-	351		0	0	0	0	0	0	0	0	0	0	0	0	0	0	0	0	0	1	0	1	0	0	0	0	0	0	0	0	0	0	0	0	0	0	0	0	0	0	0	0
GI1	SAPA_G0011	MC_05-0828.scaffold_C3005_orf00058	Predicted prophage protein	Phage	-	269	-	352		0	0	0	0	0	0	0	0	0	0	0	0	1	1	0	0	0	0	0	0	0	0	0	0	0	0	0	0	0	0	0	0	0	0	0	0	0	0	0	0
GI1	SAPA_G0012	CS_NB04.055_111212_1.remap_C2618_orf00004	Eaa protein	Phage	-	187	-	353		0	0	0	0	0	0	0	0	0	0	0	0	0	0	0	0	1	0	0	0	0	0	0	1	0	0	0	0	0	0	0	0	0	0	0	0	0	0	0	0
GI1	SAPA_G0013	CS_NB04.055_111212_1.remap_C2618_orf00005	Eaa protein	Phage	-	259	eaa	354		0	0	0	0	0	0	0	0	0	0	0	0	0	0	0	0	0	0	0	0	0	0	0	1	0	0	0	0	0	0	0	0	0	0	0	0	0	0	0	0
GI1	SAPA_G0014	CS_NB04.055_111212_1.remap_C2618_orf00006	Phage protein	Phage	-	98	-	355		0	0	0	0	0	0	0	0	0	0	0	0	0	0	0	0	0	0	0	0	0	0	0	1	0	0	0	0	0	0	0	0	0	0	0	0	0	0	0	0
GI1	SAPA_G0015	CS_NB04.055_111212_1.remap_C2618_orf00007	Protein ea22	Phage	-	211	-	356		0	0	0	0	0	0	0	0	0	0	0	0	0	0	0	0	0	0	0	0	0	0	0	1	0	0	0	0	0	0	0	0	0	0	0	0	0	0	0	0
GI1	SAPA_G0016	MC_05-0677.scaffold_scaffold25_orf00063	Predicted prophage protein	Phage	-	187	eae	357		0	0	0	0	0	0	0	0	0	0	0	0	1	1	0	0	0	0	0	0	0	0	0	1	0	0	0	0	0	0	0	0	0	0	0	0	0	0	0	0
GI1	SAPA_G0017	MC_08-0742.scaffold_C2539_orf00017	Eaa1	Phage	-	272	eaa	358		0	0	0	0	0	0	0	0	0	0	0	0	0	0	0	0	1	0	0	0	0	0	0	0	0	0	0	0	0	0	0	0	0	0	0	0	0	0	0	0
GI1	SAPA_G0018	MC_08-0742.scaffold_C2539_orf00016	Orf-87	Phage	-	88	-	359		0	0	0	0	0	0	0	0	0	0	0	0	0	0	0	0	1	0	0	0	0	0	0	0	0	0	0	0	0	0	0	0	0	0	0	0	0	0	0	0
GI1	SAPA_G0019	t1915	conserved hypothetical bacteriophage protein	Phage	-	174	-	360		0	0	0	0	0	0	0	0	0	0	0	0	0	0	0	0	1	0	0	0	0	0	0	0	0	0	0	0	0	0	0	0	0	0	0	0	0	0	0	0
GI1	SAPA_G0020	WR-99_00348_batch3.remap_scaffold58_orf00088	Eaa protein	Phage	-	118	eaa	361		0	0	0	0	0	0	0	0	0	0	0	0	0	0	0	0	0	0	0	1	0	0	0	0	0	0	0	0	0	0	0	0	0	0	0	0	0	0	0	0
GI1	SAPA_G0021	DBS_20042479_111212_1.remap_scaffold9_orf00024	Eaa protein	Phage	-	136	eaa	362		0	0	0	0	0	0	0	0	0	0	0	0	0	0	0	0	0	0	0	0	0	0	0	0	0	0	0	0	0	0	0	0	0	0	0	0	0	0	0	0
GI1	SAPA_G0022	WR-99_00348_batch3.remap_scaffold58_orf00085	Conserved hypothetical bacteriophage protein	Phage	-	153	-	363		0	0	0	0	0	0	0	0	0	0	0	0	0	0	0	0	0	0	0	0	0	0	0	0	0	0	0	0	0	0	0	0	0	0	0	0	0	0	0	0
GI1	SAPA_G0023	WS1035.scaffold_scaffold22_orf00047	Hypothetical phage protein	Phage	-	86	-	364		0	0	0	0	0	0	0	0	0	0	0	0	0	0	0	0	0	0	0	0	0	0	0	0	0	0	0	0	0	0	0	0	0	0	0	0	0	0	0	0
GI1	SAPA_G0024	WR-99_00348_batch3.remap_scaffold58_orf00083	Sb34	Phage	-	77	-	365		0	0	0	0	0	0	0	0	0	0	0	0	0	0	0	0	0	0	0	0	0	0	0	0	0	0	0	0	0	0	0	0	0	0	0	0	0	0	0	0
GI1	SAPA_G0025	WS1035.scaffold_scaffold22_orf00049	Gp43	Phage	-	183	eae	366		0	0	0	0	0	0	0	0	0	0	0	0	0	0	0	0	0	0	0	0	0	0	0	0	0	0	0	0	0	0	0	0	0	0	0	0	0	0	0	0
GI1	SAPA_G0026	WS0301.scaffold_scaffold50_orf00071	Eai protein	Phage	-	63	-	367		0	0	0	0	0	0	0	0	0	0	0	0	0	0	0	0	0	0	0	0	0	0	0	0	0	0	0	0	0	0	0	0	0	0	0	0	0	0	0	0
GI1	SAPA_G0027	WR-99_00348_batch3.remap_scaffold58_orf00081	Gene 24 protein	Phage	-	96	-	368		0	0	0	0	0	0	0	0	0	0	0	0	0	0	0	0	0	0	0	0	0	0	0	0	0	0	0	0	0	0	0	0	0	0	0	0	0	0	0	0
GI1	SAPA_G0028	WR-99_00348_batch3.remap_scaffold58_orf00078	Single-stranded DNA-binding protein	Phage	-	100	-	369		0	0	0	0	0	0	0	0	0	0	0	0	0	0	0	0	0	0	0	0	0	0	0	0	0	0	0	0	0	0	0	0	0	0	0	0	0	0	0	0
GI1	SAPA_G0029	MC_08-0742.scaffold_C2539_orf00009	Anti-RecBCD protein 2	Phage	-	98	-	370		0	0	0	0	0	0	0	0	0	0	0	0	1	1	0	0	1	0	0	0	0	0	0	1	0	0	0	0	0	0	0	0	0	0	0	0	0	0	0	0
GI1	SAPA_G0030	MC_08-0742.scaffold_C2539_orf00008	Recombination protein	Phage	-	236	-	371		0	0	0	0	0	0	0	0	0	0	0	0	1	1	0	0	1	1	0	1	0	0	0	1	0	0	0	0	0	0	0	0	0	0	0	0	0	0	0	0
GI1	SAPA_G0031	MC_08-0742.scaffold_C2539_orf00004	Host-killing protein Kil	Phage	-	38	kil	372		0	0	0	0	0	0	0	0	0	0	0	0	0	0	0	0	1	0	0	0	0	0	0	0	0	0	0	0	0	0	0	0	0	0	0	0	0	0	0	0
GI1	SAPA_G0032	WR-99_00348_batch3.remap_scaffold58_orf00076	Essential recombination function protein	Phage	-	206	-	373		0	0	0	0	0	0	0	0	0	0	0	0	0	0	0	0	0	0	0	0	0	0	0	0	0	0	0	0	0	0	0	0	0	0	0	0	0	0	0	0
GI1	SAPA_G0033	MC_05-0677.scaffold_scaffold25_orf00067	Predicted prophage protein	Phage	-	48	-	374		0	0	0	0	0	0	0	0	0	0	0	0	1	1	0	0	0	1	0	1	0	0	0	1	0	0	0	0	0	0	0	0	0	0	0	0	0	0	0	0
GI1	SAPA_G0034	SF_R0374_09.scaffold_scaffold27_orf00054	Bacteriophage ST104 protein Kil	Phage	-	63	-	375		0	0	0	0	0	0	0	0	0	0	0	0	1	1	0	0	0	1	0	1	0	0	0	1	0	0	0	0	0	0	0	0	0	0	0	0	0	0	0	0
GI1	SAPA_G0035	MC_08-0532.scaffold_scaffold51_orf00003	C3-like protein	Phage	-	53	rpc	376		0	0	0	0	0	0	0	0	0	0	0	0	1	1	0	0	1	1	0	1	0	0	0	1	0	0	0	0	0	0	0	0	0	0	0	0	0	0	0	0
GI1	SAPA_G0036	MC_08-0742.scaffold_C2539_orf00002	Bacteriophage ST64T protein 17	Phage	-	76	-	377		0	0	0	0	0	0	0	0	0	0	0	0	0	0	0	0	1	1	0	0	0	0	0	0	0	0	0	0	0	0	0	0	0	0	0	0	0	0	0	0
GI1	SAPA_G0037	SF_R0374_09.scaffold_scaffold27_orf00050	Conserved hypothetical phage protein	Phage	-	145	-	378		0	0	0	0	0	0	0	0	0	0	0	0	0	0	0	0	1	1	0	1	0	0	0	1	0	0	0	0	0	0	0	0	0	0	0	0	0	0	0	0
GI1	SAPA_G0038	WR-99_00348_batch3.remap_scaffold58_orf00070	Hypothetical protein	Phage	-	108	-	379		0	0	0	0	0	0	0	0	0	0	0	0	0	0	0	0	0	0	0	0	0	0	0	0	0	0	0	0	0	0	0	0	0	0	0	0	0	0	0	0
GI1	SAPA_G0039	WR-99_00348_batch3.remap_scaffold58_orf00068	Antirestriction protein	Phage	-	67	-	380		0	0	0	0	0	0	0	0	0	0	0	0	1	1	0	0	1	1	0	1	0	0	0	0	0	0	0	0	0	0	0	0	0	0	0	0	0	0	0	0
GI1	SAPA_G0040	WR-99_00348_batch3.remap_scaffold58_orf00066	N-like protein	Phage	-	128	-	381		0	0	0	0	0	0	0	0	0	0	0	0	0	0	0	0	0	0	0	0	0	0	0	1	0	0	0	0	0	0	0	0	0	0	0	0	0	0	0	0
GI1	SAPA_G0041	CS_NB04.055_111212_1.remap_scaffold42_orf00064	Predicted prophage protein	Phage	-	70	-	382		0	0	0	0	0	0	0	0	0	0	0	0	0	0	0	0	0	0	0	0	0	0	0	1	0	0	0	0	0	0	0	0	0	0	0	0	0	0	0	0
GI1	SAPA_G0042	CS_NB04.055_111212_1.remap_scaffold42_orf00063	Putative uncharacterized protein	Phage	-	272	-	383		0	0	0	0	0	0	0	0	0	0	0	0	0	0	0	0	0	0	0	0	0	0	0	1	0	0	0	0	0	0	0	0	0	0	0	0	0	0	0	0
GI1	SAPA_G0043	WR-99_00348_batch3.remap_scaffold58_orf00063	Putative uncharacterized protein	Phage	-	341	-	384		0	0	0	0	0	0	0	0	0	0	0	0	0	0	0	0	0	0	0	0	0	0	0	0	0	0	0	0	0	0	0	0	0	0	0	0	0	0	0	0
GI1	SAPA_G0044	WS0301.scaffold_scaffold50_orf00077	Ral protein	Phage	-	57	-	385		0	0	0	0	0	0	0	0	0	0	0	0	0	0	0	0	0	0	0	0	0	0	0	0	0	0	0	0	0	0	0	0	0	0	0	0	0	0	0	0
GI1	SAPA_G0045	WS0301.scaffold_scaffold50_orf00078	Putative uncharacterized protein	Phage	-	122	-	386		0	0	0	0	0	0	0	0	0	0	0	0	0	0	0	0	0	0	0	0	0	0	0	0	0	0	0	0	0	0	0	0	0	0	0	0	0	0	0	0
GI1	SAPA_G0046	MC_05-0677.scaffold_scaffold25_orf00072	Superinfection exclusion	Phage	-	187	-	387		0	0	0	0	0	0	0	0	0	0	0	0	1	1	0	0	0	1	0	0	0	0	0	0	0	0	0	0	0	0	0	0	0	0	0	0	0	0	0	0
GI1	SAPA_G0047	MC_08-0532.scaffold_scaffold2_orf00011	bacteriophage ST64T protein 24	Phage	-	111	-	388		0	0	0	0	0	0	0	0	0	0	0	0	1	1	0	0	1	1	0	1	0	0	0	0	0	0	0	0	0	0	0	0	0	0	0	0	0	0	0	0
GI1	SAPA_G0048	MC_08-0532.scaffold_scaffold15_orf00001	Peptidase S24-like domain protein	Phage	-	85	-	389		0	0	0	0	0	0	0	0	0	0	0	0	0	0	0	0	0	0	0	1	0	0	0	0	0	0	0	0	0	0	0	0	0	0	0	0	0	0	0	0
GI1	SAPA_G0049	MC_05-0828.scaffold_C3005_orf00044	Regulatory protein CII	Phage	-	93	-	390		0	0	0	0	0	0	0	0	0	0	0	0	1	1	0	0	0	0	0	1	0	0	0	1	0	0	0	0	0	0	0	0	0	0	0	0	0	0	0	0
GI1	SAPA_G0050	MC_08-0532.scaffold_scaffold15_orf00004	DNA replication protein gp18	Phage	-	272	-	391		0	0	0	0	0	0	0	0	0	0	0	0	0	0	0	0	0	0	0	1	0	0	0	1	0	0	0	0	0	0	0	0	0	0	0	0	0	0	0	0
GI1	SAPA_G0051	CS_NB04.055_111212_1.remap_scaffold42_orf00060	Replicative DNA helicase	Phage	-	798	-	392		0	0	0	0	0	0	0	0	0	0	0	0	0	0	0	0	0	0	0	0	0	0	0	1	0	0	0	0	0	0	0	0	0	0	0	0	0	0	0	0
GI1	SAPA_G0052	CS_NB04.055_111212_1.remap_scaffold42_orf00057	Gp62	Phage	-	43	-	393		0	0	0	0	0	0	0	0	0	0	0	0	0	0	0	0	0	0	0	0	0	0	0	1	0	0	0	0	0	0	0	0	0	0	0	0	0	0	0	0
GI1	SAPA_G0053	MC_08-0742.scaffold_scaffold27_orf00004	Transcriptional regulator, XRE family	Phage	-	56	-	394		0	0	0	0	0	0	0	0	0	0	0	0	0	0	0	0	1	0	0	1	0	0	0	0	0	0	0	0	0	0	0	0	0	0	0	0	0	0	0	0
GI1	SAPA_G0054	MC_08-0532.scaffold_scaffold2_orf00009	Transcriptional activator-regulatory protein	Phage	-	94	-	395		0	0	0	0	0	0	0	0	0	0	0	0	0	0	0	0	1	1	0	1	0	0	0	0	0	0	0	0	0	0	0	0	0	0	0	0	0	0	0	0
GI1	SAPA_G0055	MC_05-0677.scaffold_scaffold25_orf00077	DNA replication	Phage	-	300	-	396		0	0	0	0	0	0	0	0	0	0	0	0	1	1	0	0	1	0	0	1	0	0	0	0	0	0	0	0	0	0	0	0	0	0	0	0	0	0	0	0
GI1	SAPA_G0056	MC_08-0532.scaffold_scaffold2_orf00007	Replicative DNA helicase homolog	Phage	-	479	-	397		0	0	0	0	0	0	0	0	0	0	0	0	1	1	0	0	1	0	0	1	0	0	0	0	0	0	0	0	0	0	0	0	0	0	0	0	0	0	0	0
GI1	SAPA_G0057	SF_R0374_09.scaffold_scaffold27_orf00044	ORF23	Phage	-	348	-	398		0	0	0	0	0	0	0	0	0	0	0	0	0	0	0	0	0	1	0	0	0	0	0	0	0	0	0	0	0	0	0	0	0	0	0	0	0	0	0	0
GI1	SAPA_G0058	WS0301.scaffold_scaffold50_orf00084	CII Protein	Phage	-	74	-	399		0	0	0	0	0	0	0	0	0	0	0	0	0	0	0	0	0	0	0	0	0	0	0	0	0	0	0	0	0	0	0	0	0	0	0	0	0	0	0	0
GI1	SAPA_G0059	SF_R0374_09.scaffold_scaffold27_orf00040	bacteriophage replication protein O	Phage	-	274	-	400		0	0	0	0	0	0	0	0	0	0	0	0	0	0	0	0	0	1	0	0	0	0	0	0	0	0	0	0	0	0	0	0	0	0	0	0	0	0	0	0
GI1	SAPA_G0060	MC_08-0532.scaffold_scaffold2_orf00006	Putative uncharacterized protein	Phage	-	104	-	401		0	0	0	0	0	0	0	0	0	0	0	0	0	0	0	0	0	0	0	1	0	0	0	0	0	0	0	0	0	0	0	0	0	0	0	0	0	0	0	0
GI1	SAPA_G0061	CS_NB04.055_111212_1.remap_scaffold42_orf00054	Predicted prophage protein	Phage	-	63	-	402		0	0	0	0	0	0	0	0	0	0	0	0	0	0	0	0	0	0	0	1	0	0	0	1	0	0	0	0	0	0	0	0	0	0	0	0	0	0	0	0
GI1	SAPA_G0062	MC_08-0532.scaffold_scaffold2_orf00004	Protein NinB	Phage	-	73	-	403		0	0	0	0	0	0	0	0	0	0	0	0	1	1	0	0	0	1	0	1	0	0	0	0	0	0	0	0	0	0	0	0	0	0	0	0	0	0	0	0
GI1	SAPA_G0063	WR-99_00348_batch3.remap_scaffold58_orf00053	DNA N-6-adenine methyltransferase Dam	Phage	-	176	-	404		0	0	0	0	0	0	0	0	0	0	0	0	0	0	0	0	0	0	0	0	0	0	0	0	0	0	0	0	0	0	0	0	0	0	0	0	0	0	0	0
GI1	SAPA_G0064	MC_08-0742.scaffold_scaffold27_orf00008	Predicted prophage protein	Phage	-	91	-	405		0	0	0	0	0	0	0	0	0	0	0	0	0	0	0	0	1	0	0	0	0	0	0	0	0	0	0	0	0	0	0	0	0	0	0	0	0	0	0	0
GI1	SAPA_G0065	MC_08-0742.scaffold_scaffold27_orf00009	Orf-86	Phage	-	61	-	406		0	0	0	0	0	0	0	0	0	0	0	0	0	0	0	0	1	0	0	0	0	0	0	0	0	0	0	0	0	0	0	0	0	0	0	0	0	0	0	0
GI1	SAPA_G0066	MC_05-0677.scaffold_scaffold25_orf00079	Protein ninF	Phage	-	59	-	407		0	0	0	0	0	0	0	0	0	0	0	0	1	1	0	0	1	1	0	1	0	0	0	1	0	0	0	0	0	0	0	0	0	0	0	0	0	0	0	0
GI1	SAPA_G0067	MC_05-0677.scaffold_scaffold25_orf00081	Bacteriophage Lambda NinG protein	Phage	-	67	ninG	408		0	0	0	0	0	0	0	0	0	0	0	0	1	1	0	0	0	1	0	1	0	0	0	1	0	0	0	0	0	0	0	0	0	0	0	0	0	0	0	0
GI1	SAPA_G0068	SF_R0374_09.scaffold_scaffold27_orf00027	Gp23	Phage	-	258	-	409		0	0	0	0	0	0	0	0	0	0	0	0	1	1	0	0	0	1	0	0	0	0	0	1	0	0	0	0	0	0	0	0	0	0	0	0	0	0	0	0
GI1	SAPA_G0069	WS0301.scaffold_scaffold50_orf00089	Putative phage protein	Phage	-	90	-	410		0	0	0	0	0	0	0	0	0	0	0	0	0	0	0	0	0	0	0	0	0	0	0	0	0	0	0	0	0	0	0	0	0	0	0	0	0	0	0	0
GI1	SAPA_G0070	MC_08-0742.scaffold_scaffold27_orf00010	Orf-101	Phage	-	101	-	411		0	0	0	0	0	0	0	0	0	0	0	0	0	0	0	0	1	0	0	0	0	0	0	0	0	0	0	0	0	0	0	0	0	0	0	0	0	0	0	0
GI1	SAPA_G0071	MC_08-0742.scaffold_scaffold27_orf00011	82 prophage-derived ybcO	Phage	-	97	-	412		0	0	0	0	0	0	0	0	0	0	0	0	0	0	0	0	1	0	0	0	0	0	0	0	0	0	0	0	0	0	0	0	0	0	0	0	0	0	0	0
GI1	SAPA_G0072	MC_08-0532.scaffold_scaffold2_orf00003	Adenine methylase	Phage	-	51	-	413		0	0	0	0	0	0	0	0	0	0	0	0	0	0	0	0	0	0	0	1	0	0	0	0	0	0	0	0	0	0	0	0	0	0	0	0	0	0	0	0
GI1	SAPA_G0073	MC_08-0532.scaffold_scaffold2_orf00001	Putative uncharacterized protein	Phage	-	134	-	414		0	0	0	0	0	0	0	0	0	0	0	0	0	0	0	0	0	0	0	1	0	0	0	0	0	0	0	0	0	0	0	0	0	0	0	0	0	0	0	0
GI1	SAPA_G0074	WS1035.scaffold_scaffold74_orf00047	Crossover junction endodeoxyribonuclease rusA	Phage	-	59	-	415		0	0	0	0	0	0	0	0	0	0	0	0	0	0	0	0	1	0	0	0	0	0	0	0	0	0	0	0	0	0	0	0	0	0	0	0	0	0	0	0
GI1	SAPA_G0075	MC_08-0742.scaffold_scaffold27_orf00014	Phage antitermination protein Q	Phage	-	64	-	416		0	0	0	0	0	0	0	0	0	0	0	0	0	0	0	0	1	0	0	1	0	0	0	0	0	0	0	0	0	0	0	0	0	0	0	0	0	0	0	0
GI1	SAPA_G0076	MC_08-0742.scaffold_scaffold27_orf00015	Gp13	Phage	-	106	-	417		0	0	0	0	0	0	0	0	0	0	0	0	0	0	0	0	1	0	0	0	0	0	0	0	0	0	0	0	0	0	0	0	0	0	0	0	0	0	0	0
GI1	SAPA_G0077	MC_08-0742.scaffold_scaffold27_orf00017	Gp19	Phage	-	72	-	418		0	0	0	0	0	0	0	0	0	0	0	0	0	0	0	0	1	0	0	0	0	0	0	0	0	0	0	0	0	0	0	0	0	0	0	0	0	0	0	0
GI1	SAPA_G0078	WS1035.scaffold_scaffold74_orf00041	Putative bacteriophage protein	Phage	-	91	-	419		0	0	0	0	0	0	0	0	0	0	0	0	0	0	0	0	0	0	0	0	0	0	0	0	0	0	0	0	0	0	0	0	0	0	0	0	0	0	0	0
GI1	SAPA_G0079	MC_05-0828.scaffold_C3005_orf00031	Lysozyme	Phage	-	106	ybcS	420		0	0	0	0	0	0	0	0	0	0	0	0	1	1	0	0	0	1	0	1	0	0	0	1	0	0	0	0	0	0	0	0	0	0	0	0	0	0	0	0
GI1	SAPA_G0080	MC_05-0677.scaffold_scaffold25_orf00090	Endopeptidase from phage origin (Lysis protein Rz)	Phage	-	156	-	421		0	0	0	0	0	0	0	0	0	0	0	0	1	1	0	0	0	1	0	1	0	0	0	0	0	0	0	0	0	0	0	0	0	0	0	0	0	0	0	0
GI1	SAPA_G0081	SF_R0374_09.scaffold_scaffold27_orf00023	phage-like protein	Phage	-	94	-	422		0	0	0	0	0	0	0	0	0	0	0	0	1	1	0	0	0	1	0	0	0	0	0	0	0	0	0	0	0	0	0	0	0	0	0	0	0	0	0	0
GI1	SAPA_G0085	MC_08-0532.scaffold_C2993_orf00002	Bacteriophage lysis protein	Phage	-	146	-	426		0	0	0	0	0	0	0	0	0	0	0	0	0	0	0	0	1	0	0	1	0	0	0	1	0	0	0	0	0	0	0	0	0	0	0	0	0	0	0	0
GI1	SAPA_G0086	MC_08-0532.scaffold_C3233_orf00001	Gp79	Phage	-	171	-	427		0	0	0	0	0	0	0	0	0	0	0	0	0	0	0	0	0	0	0	1	0	0	0	0	0	0	0	0	0	0	0	0	0	0	0	0	0	0	0	0
GI1	SAPA_G0087	MC_08-0532.scaffold_C3233_orf00002	Gene 67 protein	Phage	-	81	-	428		0	0	0	0	0	0	0	0	0	0	0	0	0	0	0	0	0	0	0	1	0	0	0	0	0	0	0	0	0	0	0	0	0	0	0	0	0	0	0	0
GI1	SAPA_G0088	MC_05-0677.scaffold_scaffold25_orf00097	Orf-118	Phage	-	81	-	429		0	0	0	0	0	0	0	0	0	0	0	0	1	1	0	0	1	1	0	0	0	0	0	0	0	0	0	0	0	0	0	0	0	0	0	0	0	0	0	0
GI1	SAPA_G0089	MC_08-0742.scaffold_scaffold27_orf00022	Terminase large subunit	Phage	-	500	-	430		0	0	0	0	0	0	0	0	0	0	0	0	1	1	0	0	1	1	0	1	0	0	0	0	0	0	0	0	0	0	0	0	0	0	0	0	0	0	0	0
GI1	SAPA_G0090	SF_R0374_09.scaffold_scaffold27_orf00018	portal protein	Phage	-	726	-	431		0	0	0	0	0	0	0	0	0	0	0	0	1	1	0	0	1	1	0	1	0	0	0	0	0	0	0	0	0	0	0	0	0	0	0	0	0	0	0	0
GI1	SAPA_G0091	MC_08-0742.scaffold_scaffold27_orf00025	Scaffolding protein	Phage	-	304	-	432		0	0	0	0	0	0	0	0	0	0	0	0	1	1	0	0	1	1	0	1	0	0	0	0	0	0	0	0	0	0	0	0	0	0	0	0	0	0	0	0
GI1	SAPA_G0092	SF_R0374_09.scaffold_scaffold27_orf00016	Coat protein	Phage	-	431	-	433		0	0	0	0	0	0	0	0	0	0	0	0	1	1	0	0	1	1	0	1	0	0	0	0	0	0	0	0	0	0	0	0	0	0	0	0	0	0	0	0
GI1	SAPA_G0093	WS0301.scaffold_scaffold55_orf00015	Uncharacterized 7.7 kDa protein in gp5-gp4 intergenic region	Phage	-	70	-	434		0	0	0	0	0	0	0	0	0	0	0	0	0	0	0	0	0	0	0	1	0	0	0	0	0	0	0	0	0	0	0	0	0	0	0	0	0	0	0	0
GI1	SAPA_G0094	MC_08-0742.scaffold_scaffold27_orf00027	Predicted prophage protein	Phage	-	187	-	435		0	0	0	0	0	0	0	0	0	0	0	0	1	1	0	0	1	1	0	0	0	0	0	0	0	0	0	0	0	0	0	0	0	0	0	0	0	0	0	0
GI1	SAPA_G0095	MC_08-0742.scaffold_scaffold27_orf00028	Packaged DNA stabilization protein gp4	Phage	-	167	-	436		0	0	0	0	0	0	0	0	0	0	0	0	1	1	0	0	1	1	0	1	0	0	0	0	0	0	0	0	0	0	0	0	0	0	0	0	0	0	0	0
GI1	SAPA_G0096	MC_05-0677.scaffold_scaffold25_orf00107	Tail accessory protein	Phage	-	473	-	437		0	0	0	0	0	0	0	0	0	0	0	0	1	1	0	0	1	1	0	1	0	0	0	0	0	0	0	0	0	0	0	0	0	0	0	0	0	0	0	0
GI1	SAPA_G0097	SF_R0374_09.scaffold_scaffold27_orf00011	Packaged DNA stabilization protein	Phage	-	234	-	438		0	0	0	0	0	0	0	0	0	0	0	0	0	0	0	0	0	1	0	1	0	0	0	0	0	0	0	0	0	0	0	0	0	0	0	0	0	0	0	0
GI1	SAPA_G0098	MC_08-0742.scaffold_scaffold27_orf00034	Virion stability factor	Phage	-	152	-	439		0	0	0	0	0	0	0	0	0	0	0	0	1	1	0	0	1	1	0	1	0	0	0	0	0	0	0	0	0	0	0	0	0	0	0	0	0	0	0	0
GI1	SAPA_G0099	SF_R0374_09.scaffold_scaffold27_orf00009	Similar to bacteriophage P22 gp7 in GenBank Accession Number AAF75053	Phage	-	230	-	440		0	0	0	0	0	0	0	0	0	0	0	0	0	0	0	0	0	1	0	0	0	0	0	0	0	0	0	0	0	0	0	0	0	0	0	0	0	0	0	0
GI1	SAPA_G0100	SF_R0374_09.scaffold_scaffold27_orf00008	DNA transfer protein gp20	Phage	-	479	-	441		0	0	0	0	0	0	0	0	0	0	0	0	0	0	0	0	0	1	0	0	0	0	0	0	0	0	0	0	0	0	0	0	0	0	0	0	0	0	0	0
GI1	SAPA_G0101	MC_08-0742.scaffold_scaffold27_orf00035	DNA transfer protein gp7	Phage	-	230	-	442		0	0	0	0	0	0	0	0	0	0	0	0	1	1	0	0	1	0	0	1	0	0	0	0	0	0	0	0	0	0	0	0	0	0	0	0	0	0	0	0
GI1	SAPA_G0102	MC_05-0828.scaffold_C3005_orf00007	DNA transfer protein	Phage	-	445	-	443		0	0	0	0	0	0	0	0	0	0	0	0	1	1	0	0	1	0	0	1	0	0	0	0	0	0	0	0	0	0	0	0	0	0	0	0	0	0	0	0
GI1	SAPA_G0103	MC_05-0677.scaffold_scaffold25_orf00115	DNA transfer protein	Phage	-	659	-	444		0	0	0	0	0	0	0	0	0	0	0	0	1	1	0	0	1	1	0	1	0	0	0	0	0	0	0	0	0	0	0	0	0	0	0	0	0	0	0	0
GI1	SAPA_G0104	SF_R0374_09.scaffold_scaffold27_orf00005	9 protein	Phage	-	668	-	445		0	0	0	0	0	0	0	0	0	0	0	0	1	1	0	0	1	1	0	1	0	0	0	0	0	0	0	0	0	0	0	0	0	0	0	0	0	0	0	0
GI1	SAPA_G0105	SF_R0374_09.scaffold_scaffold27_orf00003	O-antigen conversion: translocase	Phage	-	486	-	446		0	0	0	0	0	0	0	0	0	0	0	0	1	1	0	0	1	1	0	1	0	0	0	0	0	0	0	0	0	0	0	0	0	0	0	0	0	0	0	0
GI1	SAPA_G0106	WR-99_00348_batch3.remap_scaffold58_orf00043	KilA-N domain family	Phage	-	166	-	447		0	0	0	0	0	0	0	0	0	0	0	0	0	0	0	0	0	0	0	0	0	0	0	1	0	0	0	0	0	0	0	0	0	0	0	0	0	0	0	0
GI1	SAPA_G0107	WR-99_00348_batch3.remap_scaffold58_orf00042	Hypothetical bacteriophage protein	Phage	-	61	-	448		0	0	0	0	0	0	0	0	0	0	0	0	0	0	0	0	0	0	0	0	0	0	0	1	0	0	0	0	0	0	0	0	0	0	0	0	0	0	0	0
GI1	SAPA_G0108	WR-99_00348_batch3.remap_scaffold58_orf00041	Gp1	Phage	-	86	-	449		0	0	0	0	0	0	0	0	0	0	0	0	0	0	0	0	0	0	0	0	0	0	0	1	0	0	0	0	0	0	0	0	0	0	0	0	0	0	0	0
GI1	SAPA_G0109	WR-99_00348_batch3.remap_scaffold58_orf00040	Similar to phage terminase large subunit	Phage	-	440	-	450		0	0	0	0	0	0	0	0	0	0	0	0	0	0	0	0	0	0	0	0	0	0	0	1	0	0	0	0	0	0	0	0	0	0	0	0	0	0	0	0
GI1	SAPA_G0110	CS_NB04.055_111212_1.remap_scaffold42_orf00040	Gp5	Phage	-	451	-	451		0	0	0	0	0	0	0	0	0	0	0	0	0	0	0	0	0	0	0	0	0	0	0	1	0	0	0	0	0	0	0	0	0	0	0	0	0	0	0	0
GI1	SAPA_G0111	CS_NB04.055_111212_1.remap_scaffold42_orf00039	Gp6	Phage	-	320	-	452		0	0	0	0	0	0	0	0	0	0	0	0	0	0	0	0	0	0	0	0	0	0	0	1	0	0	0	0	0	0	0	0	0	0	0	0	0	0	0	0
GI1	SAPA_G0112	WR-99_00348_batch3.remap_scaffold58_orf00037	Gp7	Phage	-	421	-	453		0	0	0	0	0	0	0	0	0	0	0	0	0	0	0	0	0	0	0	0	0	0	0	1	0	0	0	0	0	0	0	0	0	0	0	0	0	0	0	0
GI1	SAPA_G0113	CS_NB04.055_111212_1.remap_scaffold42_orf00036	gp8	Phage	-	150	-	454		0	0	0	0	0	0	0	0	0	0	0	0	0	0	0	0	0	0	0	0	0	0	0	1	0	0	0	0	0	0	0	0	0	0	0	0	0	0	0	0
GI1	SAPA_G0114	WR-99_00348_batch3.remap_scaffold58_orf00033	Gp9	Phage	-	359	-	455		0	0	0	0	0	0	0	0	0	0	0	0	0	0	0	0	0	0	0	0	0	0	0	1	0	0	0	0	0	0	0	0	0	0	0	0	0	0	0	0
GI1	SAPA_G0115	WR-99_00348_batch3.remap_scaffold58_orf00028	Gp13	Phage	-	121	-	456		0	0	0	0	0	0	0	0	0	0	0	0	0	0	0	0	0	0	0	0	0	0	0	1	0	0	0	0	0	0	0	0	0	0	0	0	0	0	0	0
GI1	SAPA_G0116	CS_NB04.055_111212_1.remap_scaffold42_orf00028	hypothetical protein	Phage	-	146	-	457		0	0	0	0	0	0	0	0	0	0	0	0	0	0	0	0	0	0	0	0	0	0	0	1	0	0	0	0	0	0	0	0	0	0	0	0	0	0	0	0
GI1	SAPA_G0117	WR-99_00348_batch3.remap_scaffold58_orf00025	Gp15	Phage	-	129	-	458		0	0	0	0	0	0	0	0	0	0	0	0	0	0	0	0	0	0	0	0	0	0	0	1	0	0	0	0	0	0	0	0	0	0	0	0	0	0	0	0
GI1	SAPA_G0118	CS_NB04.055_111212_1.remap_scaffold42_orf00025	Gp16	Phage	-	247	-	459		0	0	0	0	0	0	0	0	0	0	0	0	0	0	0	0	0	0	0	0	0	0	0	1	0	0	0	0	0	0	0	0	0	0	0	0	0	0	0	0
GI1	SAPA_G0119	CS_NB04.055_111212_1.remap_scaffold42_orf00024	Gp17	Phage	-	92	-	460		0	0	0	0	0	0	0	0	0	0	0	0	0	0	0	0	0	0	0	0	0	0	0	1	0	0	0	0	0	0	0	0	0	0	0	0	0	0	0	0
GI1	SAPA_G0120	CS_NB04.055_111212_1.remap_scaffold42_orf00022	Gp18	Phage	-	58	-	461		0	0	0	0	0	0	0	0	0	0	0	0	0	0	0	0	0	0	0	0	0	0	0	1	0	0	0	0	0	0	0	0	0	0	0	0	0	0	0	0
GI1	SAPA_G0121	CS_NB04.055_111212_1.remap_scaffold42_orf00021	Gp19	Phage	-	526	-	462		0	0	0	0	0	0	0	0	0	0	0	0	0	0	0	0	0	0	0	0	0	0	0	1	0	0	0	0	0	0	0	0	0	0	0	0	0	0	0	0
GI1	SAPA_G0122	CS_NB04.055_111212_1.remap_scaffold42_orf00020	KilA, N-domain protein	Phage	-	285	-	463		0	0	0	0	0	0	0	0	0	0	0	0	0	0	0	0	0	0	0	0	0	0	0	1	0	0	0	0	0	0	0	0	0	0	0	0	0	0	0	0
GI1	SAPA_G0123	CS_NB04.055_111212_1.remap_scaffold42_orf00019	Putative uncharacterized protein	Phage	-	285	-	464		0	0	0	0	0	0	0	0	0	0	0	0	0	0	0	0	0	0	0	0	0	0	0	1	0	0	0	0	0	0	0	0	0	0	0	0	0	0	0	0
GI1	SAPA_G0124	WR-99_00348_batch3.remap_scaffold58_orf00015	gp21	Phage	-	1047	-	465		0	0	0	0	0	0	0	0	0	0	0	0	0	0	0	0	0	0	0	0	0	0	0	0	0	0	0	0	0	0	0	0	0	0	0	0	0	0	0	0
GI1	SAPA_G0125	CS_NB04.055_111212_1.remap_scaffold42_orf00017	Gp21	Phage	-	1062	-	466		0	0	0	0	0	0	0	0	0	0	0	0	0	0	0	0	0	0	0	0	0	0	0	1	0	0	0	0	0	0	0	0	0	0	0	0	0	0	0	0
GI1	SAPA_G0126	WR-99_00348_batch3.remap_scaffold58_orf00011	Phage minor tail protein	Phage	-	45	-	467		0	0	0	0	0	0	0	0	0	0	0	0	0	0	0	0	0	0	0	0	0	0	0	1	0	0	0	0	0	0	0	0	0	0	0	0	0	0	0	0
GI1	SAPA_G0127	CS_NB04.055_111212_1.remap_scaffold42_orf00009	phage minor tail protein L	Phage	-	235	-	468		0	0	0	0	0	0	0	0	0	0	0	0	0	0	0	0	0	0	0	0	0	0	0	1	0	0	0	0	0	0	0	0	0	0	0	0	0	0	0	0
GI1	SAPA_G0128	CS_NB04.055_111212_1.remap_scaffold42_orf00007	putative phage tail assembly protein	Phage	-	186	-	469		0	0	0	0	0	0	0	0	0	0	0	0	0	0	0	0	0	0	0	0	0	0	0	1	0	0	0	0	0	0	0	0	0	0	0	0	0	0	0	0
GI1	SAPA_G0129	CS_NB04.055_111212_1.remap_scaffold42_orf00005	Gp28	Phage	-	116	-	470		0	0	0	0	0	0	0	0	0	0	0	0	0	0	0	0	0	0	0	0	0	0	0	1	0	0	0	0	0	0	0	0	0	0	0	0	0	0	0	0
GI1	SAPA_G0130	CS_NB04.055_111212_1.remap_scaffold42_orf00004	Gp29	Phage	-	1061	-	471		0	0	0	0	0	0	0	0	0	0	0	0	0	0	0	0	0	0	0	0	0	0	0	1	0	0	0	0	0	0	0	0	0	0	0	0	0	0	0	0
GI1	SAPA_G0131	WS1035.scaffold_scaffold74_orf00036	Prophage LambdaSo, holin, putative	Phage	-	81	-	472		0	0	0	0	0	0	0	0	0	0	0	0	0	0	0	0	0	0	0	0	0	0	0	0	0	0	0	0	0	0	0	0	0	0	0	0	0	0	0	0
GI1	SAPA_G0132	WS1035.scaffold_scaffold74_orf00035	Terminase, small subunit	Phage	-	155	-	473		0	0	0	0	0	0	0	0	0	0	0	0	0	0	0	0	0	0	0	0	0	0	0	0	0	0	0	0	0	0	0	0	0	0	0	0	0	0	0	0
GI1	SAPA_G0133	WS1035.scaffold_scaffold74_orf00033	Phage terminase, large subunit	Phage	-	580	-	474		0	0	0	0	0	0	0	0	0	0	0	0	0	0	0	0	0	0	0	0	0	0	0	0	0	0	0	0	0	0	0	0	0	0	0	0	0	0	0	0
GI1	SAPA_G0134	WS1035.scaffold_scaffold74_orf00031	Phage portal protein, HK97 family	Phage	-	335	-	475		0	0	0	0	0	0	0	0	0	0	0	0	0	0	0	0	0	0	0	0	0	0	0	0	0	0	0	0	0	0	0	0	0	0	0	0	0	0	0	0
GI1	SAPA_G0135	WS1035.scaffold_scaffold74_orf00030	peptidase S14 ClpP	Phage	-	283	-	476		0	0	0	0	0	0	0	0	0	0	0	0	0	0	0	0	0	0	0	0	0	0	0	0	0	0	0	0	0	0	0	0	0	0	0	0	0	0	0	0
GI1	SAPA_G0136	WS1035.scaffold_scaffold74_orf00029	Phage major capsid protein, HK97 family	Phage	-	406	-	477		0	0	0	0	0	0	0	0	0	0	0	0	0	0	0	0	0	0	0	0	0	0	0	0	0	0	0	0	0	0	0	0	0	0	0	0	0	0	0	0
GI1	SAPA_G0137	WS1035.scaffold_scaffold74_orf00027	Phage protein	Phage	-	109	-	478		0	0	0	0	0	0	0	0	0	0	0	0	0	0	0	0	0	0	0	0	0	0	0	0	0	0	0	0	0	0	0	0	0	0	0	0	0	0	0	0
GI1	SAPA_G0138	WS1035.scaffold_scaffold74_orf00026	Phage protein, HK97 gp10 family	Phage	-	150	-	479		0	0	0	0	0	0	0	0	0	0	0	0	0	0	0	0	0	0	0	0	0	0	0	0	0	0	0	0	0	0	0	0	0	0	0	0	0	0	0	0
GI1	SAPA_G0139	WS1035.scaffold_scaffold74_orf00025	Gp11	Phage	-	116	-	480		0	0	0	0	0	0	0	0	0	0	0	0	0	0	0	0	0	0	0	0	0	0	0	0	0	0	0	0	0	0	0	0	0	0	0	0	0	0	0	0
GI1	SAPA_G0140	WS1035.scaffold_scaffold74_orf00024	Major tail subunit	Phage	-	235	-	481		0	0	0	0	0	0	0	0	0	0	0	0	0	0	0	0	0	0	0	0	0	0	0	0	0	0	0	0	0	0	0	0	0	0	0	0	0	0	0	0
GI1	SAPA_G0141	WS1035.scaffold_scaffold74_orf00022	Preprotein translocase subunit SecA (ATPase, RNA helicase)	Phage	-	83	-	482		0	0	0	0	0	0	0	0	0	0	0	0	0	0	0	0	0	0	0	0	0	0	0	0	0	0	0	0	0	0	0	0	0	0	0	0	0	0	0	0
GI1	SAPA_G0142	WS1035.scaffold_scaffold74_orf00020	Phage-related minor tail protein	Phage	-	76	-	483		0	0	0	0	0	0	0	0	0	0	0	0	0	0	0	0	0	0	0	0	0	0	0	0	0	0	0	0	0	0	0	0	0	0	0	0	0	0	0	0
GI1	SAPA_G0143	WS1035.scaffold_scaffold74_orf00018	Phage-related membrane protein	Phage	-	112	-	484		0	0	0	0	0	0	0	0	0	0	0	0	0	0	0	0	0	0	0	0	0	0	0	0	0	0	0	0	0	0	0	0	0	0	0	0	0	0	0	0
GI1	SAPA_G0144	WS1035.scaffold_scaffold74_orf00017	Phage tail tape measure protein, lambda family	Phage	-	1105	-	485		0	0	0	0	0	0	0	0	0	0	0	0	0	0	0	0	0	0	0	0	0	0	0	0	0	0	0	0	0	0	0	0	0	0	0	0	0	0	0	0
GI1	SAPA_G0145	WS1035.scaffold_scaffold74_orf00011	Conserved hypothetical phage protein	Phage	-	198	-	486		0	0	0	0	0	0	0	0	0	0	0	0	0	0	0	0	0	0	0	0	0	0	0	0	0	0	0	0	0	0	0	0	0	0	0	0	0	0	0	0
GI1	SAPA_G0146	WS1035.scaffold_scaffold74_orf00009	Phage protein	Phage	-	195	-	487		0	0	0	0	0	0	0	0	0	0	0	0	0	0	0	0	0	0	0	0	0	0	0	0	0	0	0	0	0	0	0	0	0	0	0	0	0	0	0	0
GI1	SAPA_G0147	WS1035.scaffold_scaffold74_orf00007	Phage protein	Phage	-	133	-	488		0	0	0	0	0	0	0	0	0	0	0	0	0	0	0	0	0	0	0	0	0	0	0	0	0	0	0	0	0	0	0	0	0	0	0	0	0	0	0	0
GI1	SAPA_G0148	WS1035.scaffold_scaffold74_orf00005	Phage host specificity protein	Phage	-	904	-	489		0	0	0	0	0	0	0	0	0	0	0	0	0	0	0	0	0	0	0	0	0	0	0	0	0	0	0	0	0	0	0	0	0	0	0	0	0	0	0	0
GI1	SAPA_G0149	WR-99_00348_batch3.remap_scaffold58_orf00003	Putative uncharacterized protein	Phage	-	320	-	490		0	0	0	0	0	0	0	0	0	0	0	0	0	0	0	0	0	0	0	0	0	0	0	1	0	0	0	0	0	0	0	0	0	0	0	0	0	0	0	0
GI1	SAPA_G0150	CS_NB04.055_111212_1.remap_scaffold42_orf00001	Gp33	Phage	-	379	-	491		0	0	0	0	0	0	0	0	0	0	0	0	0	0	0	0	0	0	0	0	0	0	0	1	0	0	0	0	0	0	0	0	0	0	0	0	0	0	0	0
GI1	SAPA_G0151	WR-01-11238_111212_5.remap_scaffold52_orf00057	Site-specific recombinase, phage integrase family	Phage	-	394	-	492		0	0	0	0	0	0	0	0	0	0	0	0	0	0	0	0	0	0	0	0	0	0	1	0	0	0	0	0	0	0	0	0	0	0	0	0	0	0	0	0
GI1	SAPA_G0152	WR-01-11238_111212_5.remap_scaffold52_orf00058	Putative uncharacterized protein	Phage	-	263	-	493		0	0	0	0	0	0	0	0	0	0	0	0	0	0	0	0	0	0	0	0	0	0	1	0	0	0	0	0	0	0	0	0	0	0	0	0	0	0	0	0
GI1	SAPA_G0153	WR-05-02138_111212_5.remap_scaffold37_orf00030	Putative uncharacterized protein	Phage	-	287	-	494		0	0	0	0	0	0	0	0	0	0	0	0	0	0	0	0	0	0	0	0	0	0	1	0	0	0	0	0	0	0	0	1	1	0	0	0	0	0	0	0
GI1	SAPA_G0154	WR-00-06755_111212_4.remap_scaffold48_orf00124	Major capsid protein	Phage	-	335	-	495		0	0	0	0	0	0	0	0	0	0	0	0	0	0	0	0	0	0	0	0	0	0	1	0	0	0	0	0	0	0	0	1	1	0	0	0	0	0	0	0
GI1	SAPA_G0155	WR-01-11238_111212_5.remap_scaffold52_orf00063	Phage immunity repressor protein	Phage	-	68	-	496		0	0	0	0	0	0	0	0	0	0	0	0	0	0	0	0	0	0	0	0	0	0	1	0	0	0	0	0	0	0	0	1	1	0	0	0	0	0	0	0
GI1	SAPA_G0156	WR-01-11238_111212_5.remap_scaffold52_orf00065	Putative uncharacterized protein	Phage	-	137	-	497		0	0	0	0	0	0	0	0	0	0	0	0	0	0	0	0	0	0	0	0	0	0	1	0	0	0	0	0	0	0	0	1	1	0	0	0	0	0	0	0
GI1	SAPA_G0157	WR-05-02138_111212_5.remap_scaffold37_orf00034	Zinc-binding domain of primase-helicase family	Phage	-	896	-	498		0	0	0	0	0	0	0	0	0	0	0	0	0	0	0	0	0	0	0	0	0	0	1	0	0	0	0	0	0	0	0	1	1	0	0	0	0	0	0	0
GI1	SAPA_G0158	WR-01-11238_111212_5.remap_scaffold52_orf00068	Gp44	Phage	-	519	-	499		0	0	0	0	0	0	0	0	0	0	0	0	0	0	0	0	0	0	0	0	0	0	1	0	0	0	0	0	0	0	0	0	0	0	0	0	0	0	0	0
GI2	SAPA_G0159	SF_R0374_09.scaffold_scaffold16_orf00001	AAA superfamily ATPase with N-receiver domain	Genomic	-	910	-	752		0	0	0	0	0	0	0	0	0	0	0	0	0	0	0	0	0	0	0	0	0	0	0	0	0	0	0	0	0	0	0	0	0	0	0	0	0	0	0	0
GI2	SAPA_G0160	WS0243.scaffold_scaffold60_orf00022	sugar isomerase	Genomic	-	329	-	753		0	0	0	0	0	0	0	0	0	0	0	0	0	0	0	0	0	0	0	0	0	0	0	0	0	0	0	0	0	0	0	0	0	0	0	0	0	0	0	0
GI2	SAPA_G0161	WS0243.scaffold_scaffold60_orf00021	Glucosamine-fructose-6-phosphate aminotransferase	Genomic	-	354	-	754		0	0	0	0	0	0	0	0	0	0	0	0	0	0	0	0	0	0	0	0	0	0	0	0	0	0	0	0	0	0	0	0	0	0	0	0	0	0	0	0
GI2	SAPA_G0162	MC_05-0209.scaffold_scaffold6_orf00349	PTS system, mannose-specific enzyme II, D component	Genomic	-	285	-	755		0	0	0	0	0	0	0	0	0	0	0	0	0	0	0	0	0	0	0	0	0	0	0	0	0	0	0	0	0	0	0	0	0	0	0	0	0	0	0	0
GI2	SAPA_G0163	WS0243.scaffold_scaffold60_orf00019	Phosphotransferase system PTS, sorbose-specific IIC subunit	Genomic	-	248	-	756		0	0	0	0	0	0	0	0	0	0	0	0	0	0	0	0	0	0	0	0	0	0	0	0	0	0	0	0	0	0	0	0	0	0	0	0	0	0	0	0
GI2	SAPA_G0164	SF_R0374_09.scaffold_scaffold7_orf00005	Putative PTS system transport protein	Genomic	-	157	-	757		0	0	0	0	0	0	0	0	0	0	0	0	0	0	0	0	0	0	0	0	0	0	0	0	0	0	0	0	0	0	0	0	0	0	0	0	0	0	0	0
GI2	SAPA_G0165	MC_05-0209.scaffold_scaffold6_orf00352	Putative pts system mannose-specific enzyme iiab	Genomic	-	150	-	758		0	0	0	0	0	0	0	0	0	0	0	0	0	0	0	0	0	0	0	0	0	0	0	0	0	0	0	0	0	0	0	0	0	0	0	0	0	0	0	0
GI3	SAPA_G0166	MC_05-0811.scaffold_scaffold40_orf00077	Resolvase domain protein	Phage	-	625	-	948		0	0	0	0	0	0	0	0	0	0	0	0	0	0	0	0	0	0	0	0	0	0	0	0	0	0	0	0	0	0	0	0	0	1	0	0	0	0	0	0
GI3	SAPA_G0167	DBS_20081012.scaffold_scaffold35_orf00073	Gp30.7 protein	Phage	-	134	-	949		0	0	0	0	0	0	0	0	0	0	0	0	0	0	0	0	0	0	0	0	0	0	0	0	0	0	0	0	0	0	0	0	0	1	0	0	0	0	0	0
GI3	SAPA_G0168	DBS_20091706.scaffold_scaffold37_orf00072	Putative uncharacterized protein	Phage	-	107	-	950		0	0	0	0	0	0	0	0	0	0	0	0	0	0	0	0	0	0	0	0	0	0	0	0	0	0	0	0	0	0	0	0	0	1	0	0	0	0	0	0
GI3	SAPA_G0169	DBS_20091706.scaffold_scaffold37_orf00069	Putative uncharacterized protein	Phage	-	110	-	951		0	0	0	0	0	0	0	0	0	0	0	0	0	0	0	0	0	0	0	0	0	0	0	0	0	0	0	0	0	0	0	0	0	1	0	0	0	0	0	0
GI3	SAPA_G0170	DBS_20081012.scaffold_scaffold35_orf00068	Phage terminase large subunit	Phage	-	664	-	952		0	0	0	0	0	0	0	0	0	0	0	0	0	0	0	0	0	0	0	0	0	0	0	0	0	0	0	0	0	0	0	0	0	1	0	0	0	0	0	0
GI3	SAPA_G0171	DBS_20081012.scaffold_scaffold35_orf00066	Phage portal protein, lambda family	Phage	-	511	-	953		0	0	0	0	0	0	0	0	0	0	0	0	0	0	0	0	0	0	0	0	0	0	0	0	0	0	0	0	0	0	0	0	0	1	0	0	0	0	0	0
GI3	SAPA_G0172	DBS_20091706.scaffold_scaffold37_orf00065	Putative caudovirus prohead protease	Phage	-	610	-	954		0	0	0	0	0	0	0	0	0	0	0	0	0	0	0	0	0	0	0	0	0	0	0	0	0	0	0	0	0	0	0	0	0	1	0	0	0	0	0	0
GI3	SAPA_G0173	DBS_20081012.scaffold_scaffold35_orf00062	Putative L-shaped tail fiber protein	Phage	-	935	-	955		0	0	0	0	0	0	0	0	0	0	0	0	0	0	0	0	0	0	0	0	0	0	0	0	0	0	0	0	0	0	0	0	0	1	0	0	0	0	0	0
GI3	SAPA_G0174	DBS_20091706.scaffold_scaffold37_orf00059	Putative uncharacterized protein	Phage	-	741	-	956		0	0	0	0	0	0	0	0	0	0	0	0	0	0	0	0	0	0	0	0	0	0	0	0	0	0	0	0	0	0	0	0	0	1	0	0	0	0	0	0
GI3	SAPA_G0175	DBS_20081012.scaffold_scaffold35_orf00055	Putative uncharacterized protein	Phage	-	1068	-	957		0	0	0	0	0	0	0	0	0	0	0	0	0	0	0	0	0	0	0	0	0	0	0	0	0	0	0	0	0	0	0	0	0	1	0	0	0	0	0	0
GI3	SAPA_G0176	DBS_20081012.scaffold_scaffold35_orf00053	Lysozyme	Phage	-	151	-	958		0	0	0	0	0	0	0	0	0	0	0	0	0	0	0	0	0	0	0	0	0	0	0	0	0	0	0	0	0	0	0	0	0	1	0	0	0	0	0	0
GI3	SAPA_G0177	DBS_20091706.scaffold_scaffold37_orf00050	Phosphatase YbhA	Phage	-	281	-	959		0	0	0	0	0	0	0	0	0	0	0	0	0	0	0	0	0	0	0	0	0	0	0	0	0	0	0	0	0	0	0	0	0	1	0	0	0	0	0	0
GI4	SAPA_G0178	MC_08-0532.scaffold_C3119_orf00002	Phage integrase, SAM-like domain protein	Phage	-	357	intE	962		0	0	0	0	0	0	0	0	0	0	0	0	0	0	0	0	0	0	0	1	0	0	0	0	0	0	0	0	0	0	0	0	0	0	0	0	0	0	0	0
GI4	SAPA_G0179	WR-99_00348_batch3.remap_scaffold58_orf00088	Eaa protein	Phage	-	118	eaa	963		0	0	0	0	0	0	0	0	0	0	0	0	0	0	0	0	0	0	0	1	0	0	0	0	0	0	0	0	0	0	0	0	0	0	0	0	0	0	0	0
GI4	SAPA_G0180	MC_08-0532.scaffold_scaffold2_orf00025	Ead protein	Phage	-	302	ead	964		0	0	0	0	0	0	0	0	0	0	0	0	0	0	0	0	0	0	0	1	0	0	0	0	0	0	0	0	0	0	0	0	0	0	0	0	0	0	0	0
GI4	SAPA_G0181	MC_08-0532.scaffold_scaffold2_orf00024	Putative uncharacterized protein	Phage	-	134	-	965		0	0	0	0	0	0	0	0	0	0	0	0	0	0	0	0	0	0	0	1	0	0	0	0	0	0	0	0	0	0	0	0	0	0	0	0	0	0	0	0
GI4	SAPA_G0182	MC_08-0532.scaffold_scaffold2_orf00023	Eaf protein	Phage	-	56	-	966		0	0	0	0	0	0	0	0	0	0	0	0	0	0	0	0	0	0	0	1	0	0	0	0	0	0	0	0	0	0	0	0	0	0	0	0	0	0	0	0
GI4	SAPA_G0183	MC_08-0532.scaffold_scaffold2_orf00021	Mosaic protein	Phage	-	46	-	967		0	0	0	0	0	0	0	0	0	0	0	0	0	0	0	0	0	0	0	1	0	0	0	0	0	0	0	0	0	0	0	0	0	0	0	0	0	0	0	0
GI4	SAPA_G0184	MC_08-0532.scaffold_scaffold2_orf00020	Eae-like protein	Phage	-	180	eae	968		0	0	0	0	0	0	0	0	0	0	0	0	0	0	0	0	0	0	0	1	0	0	0	0	0	0	0	0	0	0	0	0	0	0	0	0	0	0	0	0
GI4	SAPA_G0185	MC_08-0532.scaffold_scaffold2_orf00019	Siphovirus family protein	Phage	-	161	-	969		0	0	0	0	0	0	0	0	0	0	0	0	0	0	0	0	0	0	0	1	0	0	0	0	0	0	0	0	0	0	0	0	0	0	0	0	0	0	0	0
GI4	SAPA_G0186	MC_08-0532.scaffold_scaffold2_orf00018	RecT family protein	Phage	-	301	-	970		0	0	0	0	0	0	0	0	0	0	0	0	0	0	0	0	0	0	0	1	0	0	0	0	0	0	0	0	0	0	0	0	0	0	0	0	0	0	0	0
GI4	SAPA_G0187	MC_08-0532.scaffold_scaffold2_orf00016	Prophage protein	Phage	-	103	-	971		0	0	0	0	0	0	0	0	0	0	0	0	0	0	0	0	0	0	0	1	0	0	0	0	0	0	0	0	0	0	0	0	0	0	0	0	0	0	0	0
GI4	SAPA_G0188	WR-99_00348_batch3.remap_scaffold58_orf00068	Antirestriction protein	Phage	-	67	-	972		0	0	0	0	0	0	0	0	0	0	0	0	1	1	0	0	1	1	0	1	0	0	0	0	0	0	0	0	0	0	0	0	0	0	0	0	0	0	0	0
GI4	SAPA_G0189	MC_08-0532.scaffold_scaffold2_orf00011	bacteriophage ST64T protein 24	Phage	-	111	-	973		0	0	0	0	0	0	0	0	0	0	0	0	1	1	0	0	1	1	0	1	0	0	0	0	0	0	0	0	0	0	0	0	0	0	0	0	0	0	0	0
GI4	SAPA_G0190	MC_08-0742.scaffold_scaffold27_orf00004	Transcriptional regulator, XRE family	Phage	-	56	-	974		0	0	0	0	0	0	0	0	0	0	0	0	0	0	0	0	1	0	0	1	0	0	0	0	0	0	0	0	0	0	0	0	0	0	0	0	0	0	0	0
GI4	SAPA_G0191	MC_08-0532.scaffold_scaffold2_orf00009	Transcriptional activator-regulatory protein	Phage	-	94	-	975		0	0	0	0	0	0	0	0	0	0	0	0	0	0	0	0	1	1	0	1	0	0	0	0	0	0	0	0	0	0	0	0	0	0	0	0	0	0	0	0
GI4	SAPA_G0192	MC_05-0677.scaffold_scaffold25_orf00077	DNA replication	Phage	-	300	-	976		0	0	0	0	0	0	0	0	0	0	0	0	1	1	0	0	1	0	0	1	0	0	0	0	0	0	0	0	0	0	0	0	0	0	0	0	0	0	0	0
GI4	SAPA_G0193	MC_08-0532.scaffold_scaffold2_orf00007	Replicative DNA helicase homolog	Phage	-	479	-	977		0	0	0	0	0	0	0	0	0	0	0	0	1	1	0	0	1	0	0	1	0	0	0	0	0	0	0	0	0	0	0	0	0	0	0	0	0	0	0	0
GI4	SAPA_G0194	MC_08-0532.scaffold_scaffold2_orf00006	Putative uncharacterized protein	Phage	-	104	-	978		0	0	0	0	0	0	0	0	0	0	0	0	0	0	0	0	0	0	0	1	0	0	0	0	0	0	0	0	0	0	0	0	0	0	0	0	0	0	0	0
GI4	SAPA_G0195	CS_NB04.055_111212_1.remap_scaffold42_orf00054	Predicted prophage protein	Phage	-	63	-	979		0	0	0	0	0	0	0	0	0	0	0	0	0	0	0	0	0	0	0	1	0	0	0	1	0	0	0	0	0	0	0	0	0	0	0	0	0	0	0	0
GI4	SAPA_G0196	MC_08-0532.scaffold_scaffold2_orf00004	Protein NinB	Phage	-	73	-	980		0	0	0	0	0	0	0	0	0	0	0	0	1	1	0	0	0	1	0	1	0	0	0	0	0	0	0	0	0	0	0	0	0	0	0	0	0	0	0	0
GI4	SAPA_G0197	MC_08-0532.scaffold_scaffold2_orf00003	Adenine methylase	Phage	-	51	-	981		0	0	0	0	0	0	0	0	0	0	0	0	0	0	0	0	0	0	0	1	0	0	0	0	0	0	0	0	0	0	0	0	0	0	0	0	0	0	0	0
GI4	SAPA_G0198	MC_08-0532.scaffold_scaffold2_orf00001	Putative uncharacterized protein	Phage	-	134	-	982		0	0	0	0	0	0	0	0	0	0	0	0	0	0	0	0	0	0	0	1	0	0	0	0	0	0	0	0	0	0	0	0	0	0	0	0	0	0	0	0
GI4	SAPA_G0199	MC_05-0677.scaffold_scaffold25_orf00079	Protein ninF	Phage	-	59	-	983		0	0	0	0	0	0	0	0	0	0	0	0	1	1	0	0	1	1	0	1	0	0	0	1	0	0	0	0	0	0	0	0	0	0	0	0	0	0	0	0
GI4	SAPA_G0200	MC_05-0677.scaffold_scaffold25_orf00081	Bacteriophage Lambda NinG protein	Phage	-	67	ninG	984		0	0	0	0	0	0	0	0	0	0	0	0	1	1	0	0	0	1	0	1	0	0	0	1	0	0	0	0	0	0	0	0	0	0	0	0	0	0	0	0
GI4	SAPA_G0201	MC_05-0677.scaffold_scaffold25_orf00090	Endopeptidase from phage origin (Lysis protein Rz)	Phage	-	156	-	985		0	0	0	0	0	0	0	0	0	0	0	0	1	1	0	0	0	1	0	1	0	0	0	0	0	0	0	0	0	0	0	0	0	0	0	0	0	0	0	0
GI4	SAPA_G0202	MC_08-0532.scaffold_C3233_orf00001	Gp79	Phage	-	171	-	986		0	0	0	0	0	0	0	0	0	0	0	0	0	0	0	0	0	0	0	1	0	0	0	0	0	0	0	0	0	0	0	0	0	0	0	0	0	0	0	0
GI4	SAPA_G0203	MC_08-0532.scaffold_C3233_orf00002	Gene 67 protein	Phage	-	81	-	987		0	0	0	0	0	0	0	0	0	0	0	0	0	0	0	0	0	0	0	1	0	0	0	0	0	0	0	0	0	0	0	0	0	0	0	0	0	0	0	0
GI4	SAPA_G0204	MC_08-0742.scaffold_scaffold27_orf00022	Terminase large subunit	Phage	-	500	-	988		0	0	0	0	0	0	0	0	0	0	0	0	1	1	0	0	1	1	0	1	0	0	0	0	0	0	0	0	0	0	0	0	0	0	0	0	0	0	0	0
GI4	SAPA_G0205	SF_R0374_09.scaffold_scaffold27_orf00018	portal protein	Phage	-	726	-	989		0	0	0	0	0	0	0	0	0	0	0	0	1	1	0	0	1	1	0	1	0	0	0	0	0	0	0	0	0	0	0	0	0	0	0	0	0	0	0	0
GI4	SAPA_G0206	MC_08-0742.scaffold_scaffold27_orf00025	Scaffolding protein	Phage	-	304	-	990		0	0	0	0	0	0	0	0	0	0	0	0	1	1	0	0	1	1	0	1	0	0	0	0	0	0	0	0	0	0	0	0	0	0	0	0	0	0	0	0
GI4	SAPA_G0207	SF_R0374_09.scaffold_scaffold27_orf00016	Coat protein	Phage	-	431	-	991		0	0	0	0	0	0	0	0	0	0	0	0	1	1	0	0	1	1	0	1	0	0	0	0	0	0	0	0	0	0	0	0	0	0	0	0	0	0	0	0
GI4	SAPA_G0208	WS0301.scaffold_scaffold55_orf00015	Uncharacterized 7.7 kDa protein in gp5-gp4 intergenic region	Phage	-	70	-	992		0	0	0	0	0	0	0	0	0	0	0	0	0	0	0	0	0	0	0	1	0	0	0	0	0	0	0	0	0	0	0	0	0	0	0	0	0	0	0	0
GI4	SAPA_G0209	MC_08-0742.scaffold_scaffold27_orf00028	Packaged DNA stabilization protein gp4	Phage	-	167	-	993		0	0	0	0	0	0	0	0	0	0	0	0	1	1	0	0	1	1	0	1	0	0	0	0	0	0	0	0	0	0	0	0	0	0	0	0	0	0	0	0
GI4	SAPA_G0210	MC_05-0677.scaffold_scaffold25_orf00107	Tail accessory protein	Phage	-	473	-	994		0	0	0	0	0	0	0	0	0	0	0	0	1	1	0	0	1	1	0	1	0	0	0	0	0	0	0	0	0	0	0	0	0	0	0	0	0	0	0	0
GI4	SAPA_G0211	SF_R0374_09.scaffold_scaffold27_orf00011	Packaged DNA stabilization protein	Phage	-	234	-	995		0	0	0	0	0	0	0	0	0	0	0	0	0	0	0	0	0	1	0	1	0	0	0	0	0	0	0	0	0	0	0	0	0	0	0	0	0	0	0	0
GI4	SAPA_G0212	MC_08-0742.scaffold_scaffold27_orf00034	Virion stability factor	Phage	-	152	-	996		0	0	0	0	0	0	0	0	0	0	0	0	1	1	0	0	1	1	0	1	0	0	0	0	0	0	0	0	0	0	0	0	0	0	0	0	0	0	0	0
GI4	SAPA_G0213	MC_08-0532.scaffold_scaffold32_orf00003	DNA transfer protein gp7	Phage	-	231	-	997		0	0	0	0	0	0	0	0	0	0	0	0	0	0	0	0	0	0	0	1	0	0	0	0	0	0	0	0	0	0	0	0	0	0	0	0	0	0	0	0
GI4	SAPA_G0214	MC_08-0532.scaffold_scaffold32_orf00005	Gene 12 protein	Phage	-	432	-	998		0	0	0	0	0	0	0	0	0	0	0	0	0	0	0	0	0	0	0	1	0	0	0	0	0	0	0	0	0	0	0	0	0	0	0	0	0	0	0	0
GI4	SAPA_G0215	MC_08-0532.scaffold_scaffold32_orf00007	DNA transfer protein	Phage	-	666	-	999		0	0	0	0	0	0	0	0	0	0	0	0	0	0	0	0	0	0	0	1	0	0	0	0	0	0	0	0	0	0	0	0	0	0	0	0	0	0	0	0
GI4	SAPA_G0216	MC_08-0532.scaffold_scaffold32_orf00008	Arc-like DNA binding domain protein	Phage	-	45	-	1000		0	0	0	0	0	0	0	0	0	0	0	0	0	0	0	0	0	0	0	1	0	0	0	0	0	0	0	0	0	0	0	0	0	0	0	0	0	0	0	0
GI4	SAPA_G0217	MC_08-0532.scaffold_scaffold57_orf00001	Tail spike protein	Phage	-	467	-	1001		0	0	0	0	0	0	0	0	0	0	0	0	0	0	0	0	0	0	0	1	0	0	0	0	0	0	0	0	0	0	0	0	0	0	0	0	0	0	0	0
GI4	SAPA_G0218	MC_08-0532.scaffold_scaffold57_orf00002	O-polysaccharide acetyltransferase protein	Phage	-	641	-	1002		0	0	0	0	0	0	0	0	0	0	0	0	0	0	0	0	0	0	0	1	0	0	0	0	0	0	0	0	0	0	0	0	0	0	0	0	0	0	0	0
GI4	SAPA_G0219	MC_08-0532.scaffold_scaffold57_orf00003	Bactoprenol-linked glucose translocase	Phage	-	67	-	1003		0	0	0	0	0	0	0	0	0	0	0	0	0	0	0	0	0	0	0	1	0	0	0	0	0	0	0	0	0	0	0	0	0	0	0	0	0	0	0	0
GI5	SAPA_G0220	MC_05-0811.scaffold_scaffold41_orf00044	Site-specific recombinase, phage integrase family	Phage	-	377	-	1086		0	0	0	0	0	0	0	0	0	0	0	0	0	0	0	0	0	0	0	0	0	0	0	0	0	0	0	0	0	0	0	0	0	0	0	0	0	0	0	0
GI5	SAPA_G0221	t3402	repressor protein	Phage	-	189	cI	1087		0	0	0	0	0	0	0	0	0	0	0	0	0	0	0	0	0	0	0	0	0	0	0	0	0	0	0	0	0	0	0	0	0	0	0	0	0	0	0	0
GI5	SAPA_G0222	MC_05-0811.scaffold_scaffold41_orf00041	Predicted regulatory protein	Phage	-	74	-	1088		0	0	0	0	0	0	0	0	0	0	0	0	0	0	0	0	0	0	0	0	0	0	0	0	0	0	0	0	0	0	0	0	0	0	0	0	0	0	0	0
GI5	SAPA_G0223	SeAg_B2879	conserved hypothetical protein	Phage	-	113	-	1089		1	1	1	1	1	1	1	1	1	1	1	1	1	1	0	1	1	1	1	0	1	1	1	1	1	1	1	1	1	1	0	0	0	0	0	1	1	1	0	1
GI5	SAPA_G0224	SeAg_B2877	C4-type zinc finger protein, DksA/TraR family	Phage	-	75	-	1090		0	0	0	0	0	0	0	0	0	0	0	0	0	0	0	1	1	1	1	0	1	1	1	1	1	1	1	1	1	1	0	0	0	0	0	1	1	1	0	0
GI5	SAPA_G0225	SeAg_B2876	retron EC67 DNA adenine methylase	Phage	-	285	-	1091		0	0	0	0	0	0	0	0	0	0	0	0	0	0	0	1	1	1	1	0	1	1	1	1	1	1	1	1	1	1	0	0	0	0	0	1	1	1	0	0
GI5	SAPA_G0226	SeAg_B2875	bacteriophage replication gene A	Phage	-	746	-	1092		1	1	1	1	1	1	1	1	1	1	1	1	1	1	0	1	1	1	1	0	1	1	1	1	1	1	1	1	1	1	0	0	0	0	0	1	1	1	0	1
GI5	SAPA_G0227	SeAg_B2874	hypothetical protein	Phage	-	42	-	1093		1	1	1	1	1	1	1	1	1	1	1	1	1	1	0	1	1	1	1	0	1	1	1	1	1	1	1	1	1	1	0	0	0	0	0	1	1	1	0	1
GI5	SAPA_G0228	SeAg_B2873	conserved hypothetical protein	Phage	-	62	-	1094		1	1	1	1	1	1	1	1	1	1	1	1	1	1	0	1	1	1	1	0	1	1	1	1	1	1	1	1	1	1	0	0	0	0	0	1	1	1	0	1
GI5	SAPA_G0229	SeAg_B2872	conserved domain protein	Phage	-	78	-	1095		0	0	0	0	0	0	0	0	0	0	0	0	0	0	0	1	1	1	1	0	0	1	1	1	1	1	1	1	1	1	0	0	0	0	0	1	1	1	0	0
GI5	SAPA_G0230	MC_05-0811.scaffold_scaffold41_orf00029	Putative uncharacterized protein	Phage	-	434	-	1096		0	0	0	0	0	0	0	0	0	0	0	0	0	0	0	0	0	0	0	0	0	0	0	0	0	0	0	0	0	0	0	0	0	0	0	0	0	0	0	0
GI5	SAPA_G0231	MC_05-0811.scaffold_scaffold41_orf00027	RNA-directed DNA polymerase (Reverse transcriptase)	Phage	-	586	-	1097		0	0	0	0	0	0	0	0	0	0	0	0	0	0	0	0	0	0	0	0	0	0	0	0	0	0	0	0	0	0	0	0	0	0	0	0	0	0	0	0
GI5	SAPA_G0232	SeAg_B2869	phage portal protein, pbsx family	Phage	-	342	-	1098		1	1	1	1	1	1	1	1	1	1	1	1	1	1	0	1	1	1	1	0	0	1	1	1	1	1	1	1	1	1	0	0	0	0	0	1	1	1	0	1
GI5	SAPA_G0233	SeAg_B2868	terminase, ATPase subunit	Phage	-	588	-	1099		1	1	1	1	1	1	1	1	1	1	1	1	1	1	0	1	1	1	1	0	1	1	1	1	1	1	1	1	1	1	0	0	0	0	0	1	1	1	0	1
GI5	SAPA_G0234	SeAg_B2867	phage capsid scaffolding protein	Phage	-	277	-	1100		1	1	1	1	1	1	1	1	1	1	1	1	1	1	0	1	1	1	1	0	0	1	1	1	1	1	1	1	1	1	0	0	0	0	0	1	1	1	0	1
GI5	SAPA_G0235	SeAg_B2866	phage major capsid protein, P2 family	Phage	-	353	-	1101		1	1	1	1	1	1	1	1	1	1	1	1	1	1	0	1	1	1	1	0	0	1	1	1	1	1	1	1	1	1	0	0	0	0	0	1	1	1	0	1
GI5	SAPA_G0236	SeAg_B2865	terminase, endonuclease subunit	Phage	-	216	-	1102		1	1	1	1	1	1	1	1	1	1	1	1	1	1	0	1	1	1	1	0	0	1	1	1	1	1	1	1	1	1	0	0	0	0	0	1	1	1	0	1
GI5	SAPA_G0237	SeAg_B2864	phage head completion protein	Phage	-	154	-	1103		1	1	1	1	1	1	1	1	1	1	1	1	1	1	0	1	1	1	1	0	0	1	1	1	1	1	1	1	1	1	0	0	0	0	0	1	1	1	0	1
GI5	SAPA_G0238	SeAg_B2863	phage Tail Protein X	Phage	-	67	-	1104		1	1	1	1	1	1	1	1	1	1	1	1	1	1	0	1	1	1	1	0	1	1	1	1	1	1	1	1	1	1	0	0	0	0	0	1	1	1	0	1
GI5	SAPA_G0239	SeAg_B2862	holin family protein	Phage	-	71	-	1105		1	1	1	1	1	1	1	1	1	1	1	1	1	1	0	1	1	1	1	0	1	1	1	1	1	1	1	1	1	1	0	0	0	0	0	1	1	1	0	1
GI5	SAPA_G0240	SeAg_B2861	phage lysozyme	Phage	-	169	-	1106		1	1	1	1	1	1	1	1	1	1	1	1	1	1	0	1	1	1	1	0	1	1	1	1	1	1	1	1	1	1	0	0	0	0	0	1	1	1	0	1
GI5	SAPA_G0241	SeAg_B2859	putative regulatory protein	Phage	-	141	-	1107		1	1	1	1	1	1	1	1	1	1	1	1	1	1	0	1	1	1	1	0	1	1	1	1	1	1	1	1	1	1	0	0	0	0	0	1	1	1	0	1
GI5	SAPA_G0242	SeAg_B2858	conserved phage protein	Phage	-	57	-	1108		1	1	1	1	1	1	1	1	1	1	1	1	1	1	0	1	1	1	1	0	1	1	1	1	1	1	1	1	1	1	0	0	0	0	0	1	1	1	0	1
GI5	SAPA_G0243	SeAg_B2857	P2 phage tail completion protein R	Phage	-	143	-	1109		1	1	1	1	1	1	1	1	1	1	1	1	1	1	0	1	1	1	1	0	1	1	1	1	1	1	1	1	1	1	0	0	0	0	0	1	1	1	0	1
GI5	SAPA_G0244	SeAg_B2856	phage virion morphogenesis protein	Phage	-	149	-	1110		1	1	1	1	1	1	1	1	1	1	1	1	1	1	0	1	1	1	1	0	1	1	1	1	1	1	1	1	1	1	0	0	0	0	0	1	1	1	0	1
GI5	SAPA_G0245	SeAg_B2854	phage baseplate assembly protein V	Phage	-	192	-	1111		1	1	1	1	1	1	1	1	1	1	1	1	1	1	0	1	1	1	1	0	1	1	1	1	1	1	1	1	1	1	0	0	0	0	0	1	1	1	0	1
GI5	SAPA_G0246	SeAg_B2853	baseplate assembly protein W	Phage	-	119	-	1112		1	1	1	1	1	1	1	1	1	1	1	1	1	1	0	1	1	1	1	0	1	1	1	1	1	1	1	1	1	1	0	0	0	0	0	1	1	1	0	1
GI5	SAPA_G0247	SeAg_B2852	baseplate assembly protein J	Phage	-	302	-	1113		1	1	1	1	1	1	1	1	1	1	1	1	1	1	0	1	1	1	1	0	1	1	1	1	1	1	1	1	1	1	0	0	0	0	0	1	1	1	0	1
GI5	SAPA_G0248	SeAg_B2851	phage tail protein I	Phage	-	201	-	1114		1	1	1	1	1	1	1	1	1	1	1	1	1	1	0	1	1	1	1	0	1	1	1	1	1	1	1	1	1	1	0	0	0	0	0	1	1	1	0	1
GI5	SAPA_G0249	STM2705	Fels-2 prophage protein	Phage	-	205	-	1115		1	1	1	1	1	1	1	1	1	1	1	1	1	1	0	0	0	0	0	0	0	0	0	0	0	0	0	0	0	0	0	0	0	0	1	0	0	0	0	1
GI5	SAPA_G0250	MC_05-0811.scaffold_scaffold12_orf00003	Tail protein	Phage	-	116	-	1116		1	1	1	1	1	1	1	1	1	1	1	1	1	1	0	0	0	0	0	0	0	0	0	0	0	0	0	0	0	0	0	0	0	0	1	0	0	0	0	1
GI5	SAPA_G0251	SeAg_B2849	putative phage tail fiber assembly protein	Phage	-	175	-	1117		1	1	1	1	1	1	1	1	1	1	1	1	1	1	0	0	0	0	0	0	0	0	0	0	0	0	0	0	0	0	0	0	0	0	1	0	0	0	0	1
GI5	SAPA_G0252	SeAg_B2848	major tail sheath protein	Phage	-	390	-	1118		1	1	1	1	1	1	1	1	1	1	1	1	1	1	0	1	1	1	1	0	1	1	1	1	1	1	1	1	1	1	0	0	0	0	0	1	1	1	0	1
GI5	SAPA_G0253	SeAg_B2847	phage major tail tube protein FII	Phage	-	171	-	1119		1	1	1	1	1	1	1	1	1	1	1	1	1	1	0	1	1	1	1	0	1	1	1	1	1	1	1	1	1	1	0	0	0	0	0	1	1	1	0	1
GI5	SAPA_G0254	SeAg_B2846	phage tail protein E	Phage	-	100	-	1120		1	1	1	1	1	1	1	1	1	1	1	1	1	1	0	1	1	1	1	0	1	1	1	1	1	1	1	1	1	1	0	0	0	0	0	1	1	1	0	1
GI5	SAPA_G0255	SeAg_B2845	phage tail protein, P2 GpE family	Phage	-	40	-	1121		1	1	1	1	1	1	1	1	1	1	1	1	1	1	0	1	1	1	1	0	1	1	1	1	1	1	1	1	1	1	0	0	0	0	0	1	1	1	0	1
GI5	SAPA_G0256	SeAg_B2844	phage tail tape measure protein	Phage	-	935	-	1122		1	1	1	1	1	1	1	1	1	1	1	1	1	1	0	0	0	0	0	0	1	1	1	1	1	1	1	1	1	1	0	0	0	0	0	0	0	0	0	1
GI5	SAPA_G0257	SeAg_B2843	phage P2 GpU family protein	Phage	-	161	-	1123		1	1	1	1	1	1	1	1	1	1	1	1	1	1	0	0	0	0	0	0	1	1	1	1	1	1	1	1	1	1	0	0	0	0	0	0	0	0	0	1
GI5	SAPA_G0258	SeAg_B2842	phage late control D family protein	Phage	-	366	-	1124		1	1	1	1	1	1	1	1	1	1	1	1	1	1	0	0	0	0	0	0	1	1	1	1	1	1	1	1	1	1	0	0	0	0	0	0	0	0	0	1
GI5	SAPA_G0259	SeAg_B2841	hypothetical protein	Phage	-	47	-	1125		1	1	1	1	1	1	1	1	1	1	1	1	1	1	0	0	0	0	0	0	1	1	1	1	1	1	1	1	1	1	0	0	0	0	0	0	0	0	0	1
GI5	SAPA_G0260	MC_05-0811.scaffold_scaffold3_orf00012	Prophage P2 OGR-like protein	Phage	-	73	-	1126		0	0	0	0	0	0	0	0	0	0	0	0	0	0	0	0	0	0	0	0	0	0	0	0	0	0	0	0	0	0	0	0	0	0	0	0	0	0	0	0
GI6	SAPA_G0261	t1929	integrase	Phage	-	446	int	1233		0	0	0	0	0	0	0	0	0	0	0	0	0	0	0	0	0	0	0	0	0	0	0	0	0	0	0	0	0	0	0	0	0	0	0	0	0	0	0	0
GI6	SAPA_G0262	DBS_20062828_111212_2.remap_scaffold15_orf00066	Putative excisionase (DUF1233)	Phage	-	83	-	1234		0	0	0	0	0	0	0	0	0	0	0	0	0	0	0	0	0	0	0	0	0	0	0	0	0	0	0	0	0	0	0	0	0	0	0	0	0	0	0	0
GI6	SAPA_G0263	DBS_20062828_111212_2.remap_scaffold15_orf00068	Predicted bacteriophage protein	Phage	-	80	-	1235		0	0	0	0	0	0	0	0	0	0	0	0	0	0	0	0	0	0	0	0	0	0	0	0	0	0	0	0	0	0	0	0	0	0	0	0	0	0	0	0
GI6	SAPA_G0264	STM1008	Gifsy-2 prophage protein	Phage	-	385	-	1236		0	0	0	0	0	0	0	0	0	0	0	0	0	0	0	0	0	0	0	0	0	0	0	0	0	0	0	0	0	0	0	0	0	0	0	0	0	0	0	0
GI6	SAPA_G0265	DBS_20062828_111212_2.remap_scaffold15_orf00070	Exodeoxyribonuclease VIII-like protein	Phage	-	976	-	1237		0	0	0	0	0	0	0	0	0	0	0	0	0	0	0	0	0	0	0	0	0	0	0	0	0	0	0	0	0	0	0	0	0	0	0	0	0	0	0	0
GI6	SAPA_G0266	STM2631	Gifsy-1 prophage protein	Phage	-	116	-	1238		0	0	0	0	0	0	0	0	0	0	0	0	0	0	0	0	0	0	0	0	0	0	0	0	0	0	0	0	0	0	0	0	0	0	0	0	0	0	0	0
GI6	SAPA_G0267	DBS_20062828_111212_2.remap_scaffold15_orf00073	Predicted bacteriophage protein	Phage	-	39	-	1239		0	0	0	0	0	0	0	0	0	0	0	0	0	0	0	0	0	0	0	0	0	0	0	0	0	0	0	0	0	0	0	0	0	0	0	0	0	0	0	0
GI6	SAPA_G0268	DBS_20062828_111212_2.remap_scaffold15_orf00074	Predicted bacteriophage protein	Phage	-	69	-	1240		0	0	0	0	0	0	0	0	0	0	0	0	0	0	0	0	0	0	0	0	0	0	0	0	0	0	0	0	0	0	0	0	0	0	0	0	0	0	0	0
GI6	SAPA_G0269	DBS_20062828_111212_2.remap_scaffold15_orf00075	Putative uncharacterized protein	Phage	-	314	-	1241		0	0	0	0	0	0	0	0	0	0	0	0	0	0	0	0	0	0	0	0	0	0	0	0	0	0	0	0	0	0	0	0	0	0	0	0	0	0	0	0
GI6	SAPA_G0270	DBS_20062828_111212_2.remap_scaffold15_orf00077	Helix-turn-helix domain protein	Phage	-	45	-	1242		0	0	0	0	0	0	0	0	0	0	0	0	0	0	0	0	0	0	0	0	0	0	0	0	0	0	0	0	0	0	0	0	0	0	0	0	0	0	0	0
GI6	SAPA_G0271	STM2627	Gifsy-1 prophage protein	Phage	-	124	-	1243		0	0	0	0	0	0	0	0	0	0	0	0	0	0	0	0	0	0	0	0	0	0	0	0	0	0	0	0	0	0	0	0	0	0	0	0	0	0	0	0
GI6	SAPA_G0272	STM2626	Gifsy-1 prophage protein	Phage	-	327	-	1244		0	0	0	0	0	0	0	0	0	0	0	0	0	0	0	0	0	0	0	0	0	0	0	0	0	0	0	0	0	0	0	0	0	0	0	0	0	0	0	0
GI6	SAPA_G0273	DBS_20062828_111212_2.remap_scaffold15_orf00081	DNA replication protein DnaC	Phage	-	250	-	1245		0	0	0	0	0	0	0	0	0	0	0	0	0	0	0	0	0	0	0	0	0	0	0	0	0	0	0	0	0	0	0	0	0	0	0	0	0	0	0	0
GI6	SAPA_G0274	STM1016	Gifsy-2 prophage protein	Phage	-	115	-	1246		0	0	0	0	0	0	0	0	0	0	0	0	0	0	0	0	0	0	0	0	0	0	0	0	0	0	0	0	0	0	0	0	0	0	0	0	0	0	0	0
GI6	SAPA_G0275	DBS_20062828_111212_2.remap_scaffold15_orf00083	Putative uncharacterized protein	Phage	-	107	-	1247		0	0	0	0	0	0	0	0	0	0	0	0	0	0	0	0	0	0	0	0	0	0	0	0	0	0	0	0	0	0	0	0	0	0	0	0	0	0	0	0
GI6	SAPA_G0276	DBS_20062828_111212_2.remap_scaffold15_orf00084	Gp40	Phage	-	82	-	1248		0	0	0	0	0	0	0	0	0	0	0	0	0	0	0	0	0	0	0	0	0	0	0	0	0	0	0	0	0	0	0	0	0	0	0	0	0	0	0	0
GI6	SAPA_G0277	DBS_20062828_111212_2.remap_scaffold15_orf00085	Putative uncharacterized protein	Phage	-	406	-	1249		0	0	0	0	0	0	0	0	0	0	0	0	0	0	0	0	0	0	0	0	0	0	0	0	0	0	0	0	0	0	0	0	0	0	0	0	0	0	0	0
GI6	SAPA_G0278	DBS_20062828_111212_2.remap_scaffold15_orf00090	Predicted bacteriophage protein	Phage	-	39	-	1250		0	0	0	0	0	0	0	0	0	0	0	0	0	0	0	0	0	0	0	0	0	0	0	0	0	0	0	0	0	0	0	0	0	0	0	0	0	0	0	0
GI6	SAPA_G0279	DBS_20062828_111212_2.remap_scaffold15_orf00091	Gifsy-2 prophage protein	Phage	-	201	-	1251		0	0	0	0	0	0	0	0	0	0	0	0	0	0	0	0	0	0	0	0	0	0	0	0	0	0	0	0	0	0	0	0	0	0	0	0	0	0	0	0
GI6	SAPA_G0280	DBS_20062828_111212_2.remap_scaffold15_orf00092	ORF3	Phage	-	69	-	1252		0	0	0	0	0	0	0	0	0	0	0	0	0	0	0	0	0	0	0	0	0	0	0	0	0	0	0	0	0	0	0	0	0	0	0	0	0	0	0	0
GI6	SAPA_G0281	STM1021	Gifsy-2 prophage protein	Phage	-	203	-	1253		0	0	0	0	0	0	0	0	0	0	0	0	0	0	0	0	0	0	0	0	0	0	0	0	0	0	0	0	0	0	0	0	0	0	0	0	0	0	0	0
GI6	SAPA_G0282	DBS_20062828_111212_2.remap_scaffold15_orf00095	Antitermination protein Q	Phage	-	266	-	1254		0	0	0	0	0	0	0	0	0	0	0	0	0	0	0	0	0	0	0	0	0	0	0	0	0	0	0	0	0	0	0	0	0	0	0	0	0	0	0	0
GI6	SAPA_G0283	STM1024	Gifsy-2 prophage protein	Phage	-	41	-	1255		0	0	0	0	0	0	0	0	0	0	0	0	0	0	0	0	0	0	0	0	0	0	0	0	0	0	0	0	0	0	0	0	0	0	0	0	0	0	0	0
GI6	SAPA_G0284	t1902	putative lipoprotein	Phage	-	149	-	1256		0	0	0	0	0	0	0	0	0	0	0	0	0	0	0	0	0	0	0	0	0	0	0	0	0	0	0	0	0	0	0	0	0	0	0	0	0	0	0	0
GI6	SAPA_G0285	STM2614	Gifsy-1 prophage protein	Phage	-	228	-	1257		0	0	0	0	0	0	0	0	0	0	0	0	0	0	0	0	0	0	0	0	0	0	0	0	0	0	0	0	0	0	0	0	0	0	0	0	0	0	0	0
GI6	SAPA_G0286	STM2613	Gifsy-1 prophage protein	Phage	-	109	-	1258		0	0	0	0	0	0	0	0	0	0	0	0	0	0	0	0	0	0	0	0	0	0	0	0	0	0	0	0	0	0	0	0	0	0	0	0	0	0	0	0
GI6	SAPA_G0287	STM1028	Gifsy-2 prophage lysozyme	Phage	-	150	-	1259		0	0	0	0	0	0	0	0	0	0	0	0	0	0	0	0	0	0	0	0	0	0	0	0	0	0	0	0	0	0	0	0	0	0	0	0	0	0	0	0
GI6	SAPA_G0288	DBS_20001356.scaffold_scaffold31_orf00137	Bacteriophage lysis protein	Phage	-	156	-	1260		0	0	0	0	0	0	0	0	0	0	0	0	0	0	0	0	0	0	0	0	0	0	0	0	0	0	0	0	0	0	0	0	0	0	0	0	0	0	0	0
GI6	SAPA_G0289	DBS_20001356.scaffold_scaffold31_orf00138	Putative uncharacterized protein	Phage	-	168	-	1261		0	0	0	0	0	0	0	0	0	0	0	0	0	0	0	0	0	0	0	0	0	0	1	0	0	0	0	0	0	0	0	0	0	0	0	1	0	0	0	0
GI6	SAPA_G0290	STM2610	Gifsy-1 prophage protein	Phage	-	133	-	1262		0	0	0	0	0	0	0	0	0	0	0	0	0	0	0	0	0	0	0	0	0	0	0	0	0	0	0	0	0	0	0	0	0	0	0	0	0	0	0	0
GI6	SAPA_G0291	DBS_20005023.scaffold_scaffold34_orf00034	Predicted terminase small subunit	Phage	-	182	-	1263		0	0	0	0	0	0	0	0	0	0	0	0	0	0	0	0	0	0	0	0	0	0	1	0	0	0	0	0	0	0	0	0	0	0	0	1	0	0	0	0
GI6	SAPA_G0292	DBS_20005023.scaffold_scaffold34_orf00032	Phage terminase large subunit	Phage	-	644	-	1264		0	0	0	0	0	0	0	0	0	0	0	0	0	0	0	0	0	0	0	0	0	0	1	0	0	0	0	0	0	0	0	0	0	0	0	1	0	0	0	0
GI6	SAPA_G0293	DBS_20005023.scaffold_scaffold34_orf00031	GpW	Phage	-	68	-	1265		0	0	0	0	0	0	0	0	0	0	0	0	0	0	0	0	0	0	0	0	0	0	1	0	0	0	0	0	0	0	0	0	0	0	0	1	0	0	0	0
GI6	SAPA_G0294	DBS_20062828_111212_2.remap_scaffold15_orf00109	Phage portal protein, lambda family	Phage	-	540	-	1266		0	0	0	0	0	0	0	0	0	0	0	0	0	0	0	0	0	0	0	0	0	0	1	0	0	0	0	0	0	0	0	0	0	0	0	1	0	0	0	0
GI6	SAPA_G0295	DBS_20005023.scaffold_scaffold34_orf00027	Head-tail preconnector-like protein	Phage	-	499	-	1267		0	0	0	0	0	0	0	0	0	0	0	0	0	0	0	0	0	0	0	0	0	0	1	0	0	0	0	0	0	0	0	0	0	0	0	1	0	0	0	0
GI6	SAPA_G0296	DBS_20005023.scaffold_scaffold34_orf00025	Bacteriophage lambda head decoration protein D	Phage	-	116	-	1268		0	0	0	0	0	0	0	0	0	0	0	0	0	0	0	0	0	0	0	0	0	0	1	0	0	0	0	0	0	0	0	0	0	0	0	1	0	0	0	0
GI6	SAPA_G0297	DBS_20005023.scaffold_scaffold34_orf00024	Phage major capsid protein E	Phage	-	343	-	1269		0	0	0	0	0	0	0	0	0	0	0	0	0	0	0	0	0	0	0	0	0	0	1	0	0	0	0	0	0	0	0	0	0	0	0	1	0	0	0	0
GI6	SAPA_G0298	DBS_20005023.scaffold_scaffold34_orf00023	Gifsy-1 prophage DNA packaging protein gp9	Phage	-	120	-	1270		0	0	0	0	0	0	0	0	0	0	0	0	0	0	0	0	0	0	0	0	0	0	1	0	0	0	0	0	0	0	0	0	0	0	0	1	0	0	0	0
GI6	SAPA_G0299	STM2601	Gifsy-1 prophage protein	Phage	-	127	-	1271		0	0	0	0	0	0	0	0	0	0	0	0	0	0	0	0	0	0	0	0	0	0	1	0	0	0	0	0	0	0	0	0	0	0	0	1	0	0	0	0
GI6	SAPA_G0300	STM2600	Gifsy-1 prophage	Phage	-	192	-	1272		0	0	0	0	0	0	0	0	0	0	0	0	0	0	0	0	0	0	0	0	0	0	1	0	0	0	0	0	0	0	0	0	0	0	0	1	0	0	0	0
GI6	SAPA_G0301	STM2598	Gifsy-1 prophage protein	Phage	-	133	-	1273		0	0	0	0	0	0	0	0	0	0	0	0	0	0	0	0	0	0	0	0	0	0	1	0	0	0	0	0	0	0	0	0	0	0	0	1	0	0	0	0
GI6	SAPA_G0302	STM2597	Gifsy-1 prophage protein	Phage	-	248	-	1274		0	0	0	0	0	0	0	0	0	0	0	0	0	0	0	0	0	0	0	0	0	0	1	0	0	0	0	0	0	0	0	0	0	0	0	1	0	0	0	0
GI6	SAPA_G0303	DBS_20005023.scaffold_scaffold34_orf00017	Phage minor tail protein G	Phage	-	132	-	1275		0	0	0	0	0	0	0	0	0	0	0	0	0	0	0	0	0	0	0	0	0	0	1	0	0	0	0	0	0	0	0	0	0	0	0	1	0	0	0	0
GI6	SAPA_G0304	STM2595	Gifsy-1 prophage protein	Phage	-	112	-	1276		0	0	0	0	0	0	0	0	0	0	0	0	0	0	0	0	0	0	0	0	0	0	1	0	0	0	0	0	0	0	0	0	0	0	0	1	0	0	0	0
GI6	SAPA_G0305	DBS_20062828_111212_2.remap_scaffold15_orf00122	Gifsy-1 prophage VmtH	Phage	-	1032	-	1277		0	0	0	0	0	0	0	0	0	0	0	0	0	0	0	0	0	0	0	0	0	0	1	0	0	0	0	0	0	0	0	0	0	0	0	1	0	0	0	0
GI6	SAPA_G0306	DBS_20005023.scaffold_scaffold34_orf00013	Phage minor tail protein	Phage	-	110	-	1278		0	0	0	0	0	0	0	0	0	0	0	0	0	0	0	0	0	0	0	0	0	0	1	0	0	0	0	0	0	0	0	0	0	0	0	1	0	0	0	0
GI6	SAPA_G0307	DBS_20005023.scaffold_scaffold34_orf00012	Phage minor tail protein L	Phage	-	233	-	1279		0	0	0	0	0	0	0	0	0	0	0	0	0	0	0	0	0	0	0	0	0	0	1	0	0	0	0	0	0	0	0	0	0	0	0	1	0	0	0	0
GI6	SAPA_G0308	DBS_20005023.scaffold_scaffold34_orf00011	Prophage tail assembly protein	Phage	-	212	-	1280		0	0	0	0	0	0	0	0	0	0	0	0	0	0	0	0	0	0	0	0	0	0	1	0	0	0	0	0	0	0	0	0	0	0	0	1	0	0	0	0
GI6	SAPA_G0309	STM2590	Gifsy-1 prophage protein	Phage	-	215	-	1281		0	0	0	0	0	0	0	0	0	0	0	0	0	0	0	0	0	0	0	0	0	0	1	0	0	0	0	0	0	0	0	0	0	0	0	1	0	0	0	0
GI6	SAPA_G0310	DBS_20005023.scaffold_scaffold34_orf00006	Phage tail protein, host specificity factor	Phage	-	1121	-	1282		0	0	0	0	0	0	0	0	0	0	0	0	0	0	0	0	0	0	0	0	0	0	1	0	0	0	0	0	0	0	0	0	0	0	0	1	0	0	0	0
GI6	SAPA_G0311	DBS_20005023.scaffold_scaffold34_orf00003	Predicted phage protein	Phage	-	81	-	1283		0	0	0	0	0	0	0	0	0	0	0	0	0	0	0	0	0	0	0	0	0	0	1	0	0	0	0	0	0	0	0	0	0	0	0	1	0	0	0	0
GI6	SAPA_G0312	DBS_20090461.scaffold_C2888_orf00044	Gp19	Phage	-	581	-	1284		0	0	0	0	0	0	0	0	0	0	0	0	0	0	0	0	0	0	0	0	0	0	0	0	0	0	0	0	0	0	0	0	0	0	0	0	0	0	0	0
GI6	SAPA_G0313	DBS_20090461.scaffold_C2888_orf00045	Tail fiber assembly protein	Phage	-	190	-	1285		0	0	0	0	0	0	0	0	0	0	0	0	0	0	0	0	0	0	0	0	0	0	0	0	0	0	0	0	0	0	0	0	0	0	0	0	0	0	0	0
GI6	SAPA_G0314	STM2584	Gifsy-1 prophage leucine-rich repeat protein	Phage	-	497	gogB	1286		0	0	0	0	0	0	0	0	0	0	0	0	0	0	0	0	0	0	0	0	0	0	0	0	0	0	0	0	0	0	0	0	0	0	0	0	0	0	0	0
GI6	SAPA_G0315	DBS_20062828_111212_2.remap_scaffold15_orf00139	Putative uncharacterized protein	Phage	-	267	-	1287		0	0	0	0	0	0	0	0	0	0	0	0	0	0	0	0	0	0	0	0	0	0	0	0	0	0	0	0	0	0	0	0	0	0	0	0	0	0	0	0
GI7	SAPA_G0316	DBS_20001356.scaffold_scaffold31_orf00106	NdpA protein	Phage	-	362	-	1319		0	0	0	0	0	0	0	0	0	0	0	0	0	0	0	0	0	0	0	0	0	0	0	0	0	0	0	0	0	0	0	0	0	0	0	0	0	0	0	0
GI7	SAPA_G0317	DBS_20001356.scaffold_scaffold31_orf00108	Putative uncharacterized protein	Phage	-	429	-	1320		0	0	0	0	0	0	0	0	0	0	0	0	0	0	0	0	0	0	0	0	0	0	0	0	0	0	0	0	0	0	0	0	0	0	0	0	0	0	0	0
GI7	SAPA_G0318	DBS_20001356.scaffold_scaffold31_orf00109	Site-specific recombinase, phage integrase family	Phage	-	341	-	1321		0	0	0	0	0	0	0	0	0	0	0	0	0	0	0	0	0	0	0	0	0	0	0	0	0	0	0	0	0	0	0	0	0	0	0	0	0	0	0	0
GI7	SAPA_G0319	DBS_20001356.scaffold_scaffold31_orf00112	Putative uncharacterized protein	Phage	-	185	-	1322		0	0	0	0	0	0	0	0	0	0	0	0	0	0	0	0	0	0	0	0	0	0	0	0	0	0	0	0	0	0	0	0	0	0	0	0	0	0	0	0
GI7	SAPA_G0320	DBS_20001356.scaffold_scaffold31_orf00113	Putative uncharacterized protein	Phage	-	758	-	1323		0	0	0	0	0	0	0	0	0	0	0	0	0	0	0	0	0	0	0	0	0	0	0	0	0	0	0	0	0	0	0	0	0	0	0	0	0	0	0	0
GI7	SAPA_G0321	DBS_20001356.scaffold_scaffold31_orf00114	Putative uncharacterized protein	Phage	-	108	-	1324		0	0	0	0	0	0	0	0	0	0	0	0	0	0	0	0	0	0	0	0	0	0	0	0	0	0	0	0	0	0	0	0	0	0	0	0	0	0	0	0
GI7	SAPA_G0322	DBS_20001356.scaffold_scaffold31_orf00116	Putative transcriptional regulator DicA	Phage	-	71	-	1325		0	0	0	0	0	0	0	0	0	0	0	0	0	0	0	0	0	0	0	0	0	0	0	0	0	0	0	0	0	0	0	0	0	0	0	0	0	0	0	0
GI7	SAPA_G0323	DBS_20001356.scaffold_scaffold31_orf00117	Putative uncharacterized protein	Phage	-	187	-	1326		0	0	0	0	0	0	0	0	0	0	0	0	0	0	0	0	0	0	0	0	0	0	0	0	0	0	0	0	0	0	0	0	0	0	0	0	0	0	0	0
GI7	SAPA_G0324	DBS_20001356.scaffold_scaffold31_orf00120	Replication protein	Phage	-	327	-	1327		0	0	0	0	0	0	0	0	0	0	0	0	0	0	0	0	0	0	0	0	0	0	0	0	0	0	0	0	0	0	0	0	0	0	0	0	0	0	0	0
GI7	SAPA_G0325	DBS_20001356.scaffold_scaffold31_orf00122	Helicase, DnaB family	Phage	-	463	-	1328		0	0	0	0	0	0	0	0	0	0	0	0	0	0	0	0	0	0	0	0	0	0	0	0	0	0	0	0	0	0	0	0	0	0	0	0	0	0	0	0
GI7	SAPA_G0326	DBS_20001356.scaffold_scaffold31_orf00123	Putative uncharacterized protein	Phage	-	227	-	1329		0	0	0	0	0	0	0	0	0	0	0	0	0	0	0	0	0	0	0	0	0	0	0	0	0	0	0	0	0	0	0	0	0	0	0	0	0	0	0	0
GI7	SAPA_G0327	DBS_20001356.scaffold_scaffold31_orf00126	Putative modification methylase, similar to MunI which recognises CAATTG	Phage	-	201	-	1330		0	0	0	0	0	0	0	0	0	0	0	0	0	0	0	0	0	0	0	0	0	0	0	0	0	0	0	0	0	0	0	0	0	0	0	0	0	0	0	0
GI7	SAPA_G0328	DBS_20001356.scaffold_scaffold31_orf00128	Hypothetical phage protein	Phage	-	113	-	1331		0	0	0	0	0	0	0	0	0	0	0	0	0	0	0	0	0	0	0	0	0	0	0	0	0	0	0	0	0	0	0	0	0	0	0	0	0	0	0	0
GI7	SAPA_G0329	DBS_20001356.scaffold_scaffold31_orf00130	Hypothetical phage-related protein	Phage	-	64	-	1332		0	0	0	0	0	0	0	0	0	0	0	0	0	0	0	0	0	0	0	0	0	0	0	0	0	0	0	0	0	0	0	0	0	0	0	0	0	0	0	0
GI7	SAPA_G0330	DBS_20001356.scaffold_scaffold31_orf00131	Gifsy-2 prophage protein	Phage	-	199	-	1333		0	0	0	0	0	0	0	0	0	0	0	0	0	0	0	0	0	0	0	0	0	0	0	0	0	0	0	0	0	0	0	0	0	0	0	0	0	0	0	0
GI7	SAPA_G0331	DBS_20001356.scaffold_scaffold31_orf00132	Putative uncharacterized protein	Phage	-	149	-	1334		0	0	0	0	0	0	0	0	0	0	0	0	0	0	0	0	0	0	0	0	0	0	0	0	0	0	0	0	0	0	0	0	0	0	0	0	0	0	0	0
GI7	SAPA_G0332	DBS_20001356.scaffold_scaffold31_orf00134	Phage-holin analog protein	Phage	-	101	-	1335		0	0	0	0	0	0	0	0	0	0	0	0	0	0	0	0	0	0	0	0	0	0	0	0	0	0	0	0	0	0	0	0	0	0	0	0	0	0	0	0
GI7	SAPA_G0333	DBS_20001356.scaffold_scaffold31_orf00136	Lysozyme	Phage	-	146	ybcS	1336		0	0	0	0	0	0	0	0	0	0	0	0	0	0	0	0	0	0	0	0	0	0	0	0	0	0	0	0	0	0	0	0	0	0	0	0	0	0	0	0
GI7	SAPA_G0334	DBS_20001356.scaffold_scaffold31_orf00137	Bacteriophage lysis protein	Phage	-	156	-	1337		0	0	0	0	0	0	0	0	0	0	0	0	0	0	0	0	0	0	0	0	0	0	0	0	0	0	0	0	0	0	0	0	0	0	0	0	0	0	0	0
GI7	SAPA_G0335	DBS_20001356.scaffold_scaffold31_orf00138	Putative uncharacterized protein	Phage	-	168	-	1338		0	0	0	0	0	0	0	0	0	0	0	0	0	0	0	0	0	0	0	0	0	0	1	0	0	0	0	0	0	0	0	0	0	0	0	1	0	0	0	0
GI7	SAPA_G0336	DBS_20001356.scaffold_scaffold31_orf00141	ORF10	Phage	-	324	-	1339		0	0	0	0	0	0	0	0	0	0	0	0	0	0	0	0	0	0	0	0	0	0	0	0	0	0	0	0	0	0	0	0	0	0	0	0	0	0	0	0
GI7	SAPA_G0337	DBS_20001356.scaffold_scaffold31_orf00142	ORF11	Phage	-	424	-	1340		0	0	0	0	0	0	0	0	0	0	0	0	0	0	0	0	0	0	0	0	0	0	0	0	0	0	0	0	0	0	0	0	0	0	0	0	0	0	0	0
GI7	SAPA_G0338	DBS_20001356.scaffold_scaffold31_orf00143	ORF12	Phage	-	477	-	1341		0	0	0	0	0	0	0	0	0	0	0	0	0	0	0	0	0	0	0	0	0	0	0	0	0	0	0	0	0	0	0	0	0	0	0	0	0	0	0	0
GI7	SAPA_G0339	DBS_20001356.scaffold_scaffold31_orf00145	ORF13	Phage	-	292	-	1342		0	0	0	0	0	0	0	0	0	0	0	0	0	0	0	0	0	0	0	0	0	0	0	0	0	0	0	0	0	0	0	0	0	0	0	0	0	0	0	0
GI7	SAPA_G0340	DBS_20001356.scaffold_scaffold31_orf00146	Nudix hydrolase	Phage	-	525	-	1343		0	0	0	0	0	0	0	0	0	0	0	0	0	0	0	0	0	0	0	0	0	0	0	0	0	0	0	0	0	0	0	0	0	0	0	0	0	0	0	0
GI7	SAPA_G0341	DBS_20001356.scaffold_scaffold31_orf00148	ORF15	Phage	-	282	-	1344		0	0	0	0	0	0	0	0	0	0	0	0	0	0	0	0	0	0	0	0	0	0	0	0	0	0	0	0	0	0	0	0	0	0	0	0	0	0	0	0
GI7	SAPA_G0342	DBS_20001356.scaffold_scaffold31_orf00149	ORF16	Phage	-	344	-	1345		0	0	0	0	0	0	0	0	0	0	0	0	0	0	0	0	0	0	0	0	0	0	0	0	0	0	0	0	0	0	0	0	0	0	0	0	0	0	0	0
GI7	SAPA_G0343	DBS_20001356.scaffold_scaffold31_orf00150	ORF17	Phage	-	162	-	1346		0	0	0	0	0	0	0	0	0	0	0	0	0	0	0	0	0	0	0	0	0	0	0	0	0	0	0	0	0	0	0	0	0	0	0	0	0	0	0	0
GI7	SAPA_G0344	DBS_20001356.scaffold_scaffold31_orf00153	ORF18	Phage	-	142	-	1347		0	0	0	0	0	0	0	0	0	0	0	0	0	0	0	0	0	0	0	0	0	0	0	0	0	0	0	0	0	0	0	0	0	0	0	0	0	0	0	0
GI7	SAPA_G0345	DBS_20001356.scaffold_scaffold31_orf00154	ORF19	Phage	-	144	-	1348		0	0	0	0	0	0	0	0	0	0	0	0	0	0	0	0	0	0	0	0	0	0	0	0	0	0	0	0	0	0	0	0	0	0	0	0	0	0	0	0
GI7	SAPA_G0346	DBS_20001356.scaffold_scaffold31_orf00155	ORF20	Phage	-	313	-	1349		0	0	0	0	0	0	0	0	0	0	0	0	0	0	0	0	0	0	0	0	0	0	0	0	0	0	0	0	0	0	0	0	0	0	0	0	0	0	0	0
GI7	SAPA_G0347	DBS_20001356.scaffold_scaffold31_orf00157	ORF21	Phage	-	465	-	1350		0	0	0	0	0	0	0	0	0	0	0	0	0	0	0	0	0	0	0	0	0	0	0	0	0	0	0	0	0	0	0	0	0	0	0	0	0	0	0	0
GI7	SAPA_G0348	DBS_20001356.scaffold_scaffold31_orf00158	ORF23	Phage	-	287	-	1351		0	0	0	0	0	0	0	0	0	0	0	0	0	0	0	0	0	0	0	0	0	0	0	0	0	0	0	0	0	0	0	0	0	0	0	0	0	0	0	0
GI7	SAPA_G0349	DBS_20001356.scaffold_scaffold31_orf00160	ORF24	Phage	-	685	-	1352		0	0	0	0	0	0	0	0	0	0	0	0	0	0	0	0	0	0	0	0	0	0	0	0	0	0	0	0	0	0	0	0	0	0	0	0	0	0	0	0
GI7	SAPA_G0350	DBS_20001356.scaffold_scaffold31_orf00161	Putative uncharacterized protein	Phage	-	239	-	1353		0	0	0	0	0	0	0	0	0	0	0	0	0	0	0	0	0	0	0	0	0	0	0	0	0	0	0	0	0	0	0	0	0	0	0	0	0	0	0	0
GI7	SAPA_G0351	DBS_20001356.scaffold_scaffold31_orf00162	ORF26	Phage	-	92	-	1354		0	0	0	0	0	0	0	0	0	0	0	0	0	0	0	0	0	0	0	0	0	0	0	0	0	0	0	0	0	0	0	0	0	0	0	0	0	0	0	0
GI7	SAPA_G0352	DBS_20001356.scaffold_scaffold31_orf00163	ORF27	Phage	-	348	-	1355		0	0	0	0	0	0	0	0	0	0	0	0	0	0	0	0	0	0	0	0	0	0	0	0	0	0	0	0	0	0	0	0	0	0	0	0	0	0	0	0
GI7	SAPA_G0353	DBS_20001356.scaffold_scaffold31_orf00164	ORF28	Phage	-	239	-	1356		0	0	0	0	0	0	0	0	0	0	0	0	0	0	0	0	0	0	0	0	0	0	0	0	0	0	0	0	0	0	0	0	0	0	0	0	0	0	0	0
GI7	SAPA_G0354	DBS_20001356.scaffold_scaffold31_orf00165	ORF29	Phage	-	111	-	1357		0	0	0	0	0	0	0	0	0	0	0	0	0	0	0	0	0	0	0	0	0	0	0	0	0	0	0	0	0	0	0	0	0	0	0	0	0	0	0	0
GI7	SAPA_G0355	DBS_20001356.scaffold_scaffold31_orf00166	ORF30	Phage	-	409	-	1358		0	0	0	0	0	0	0	0	0	0	0	0	0	0	0	0	0	0	0	0	0	0	0	0	0	0	0	0	0	0	0	0	0	0	0	0	0	0	0	0
GI7	SAPA_G0356	DBS_20001356.scaffold_scaffold31_orf00167	ORF31	Phage	-	209	-	1359		0	0	0	0	0	0	0	0	0	0	0	0	0	0	0	0	0	0	0	0	0	0	0	0	0	0	0	0	0	0	0	0	0	0	0	0	0	0	0	0
GI7	SAPA_G0357	DBS_20001356.scaffold_scaffold31_orf00168	Chimeric prophage tail protein (The product of a deletion event)	Phage	-	570	-	1360		0	0	0	0	0	0	0	0	0	0	0	0	0	0	0	0	0	0	0	0	0	0	0	0	0	0	0	0	0	0	0	0	0	0	0	0	0	0	0	0
GI7	SAPA_G0358	STM2587	Gifsy-1 prophage protein	Phage	-	274	-	1361		0	0	0	0	0	0	0	0	0	0	0	0	0	0	0	0	0	0	0	0	0	0	0	0	0	0	0	0	0	0	0	0	0	0	0	0	0	0	0	0
GI7	SAPA_G0359	DBS_20090461.scaffold_C2888_orf00045	Tail fiber assembly protein	Phage	-	190	-	1362		0	0	0	0	0	0	0	0	0	0	0	0	0	0	0	0	0	0	0	0	0	0	0	0	0	0	0	0	0	0	0	0	0	0	0	0	0	0	0	0
GI7	SAPA_G0360	DBS_20001356.scaffold_C2493_orf00002	Putative uncharacterized protein	Phage	-	145	-	1363		0	0	0	0	0	0	0	0	0	0	0	0	0	0	0	0	0	0	0	0	0	0	0	0	0	0	0	0	0	0	0	0	0	0	0	0	0	0	0	0
GI8	SAPA_G0361	SeAg_B1096	conserved hypothetical protein	Genomic	-	280	-	1412		1	1	1	1	1	1	1	1	1	1	1	1	1	1	1	1	1	1	1	0	1	1	1	0	1	1	1	1	1	1	1	1	1	1	1	1	1	1	1	1
GI8	SAPA_G0362	SeAg_B1097	type VI secretion system effector, Hcp1 family	Genomic	-	159	-	1413		1	1	1	1	1	1	1	1	1	1	1	1	1	1	1	1	1	1	1	0	1	1	1	0	1	1	1	1	1	1	1	1	1	1	1	1	1	1	1	1
GI9	SAPA_G0363	MC_08-0742.scaffold_scaffold20_orf00001	Type VI secretion system Vgr family protein	Genomic	-	219	-	1429		0	0	0	0	0	0	0	0	0	0	0	0	0	0	1	0	1	1	1	0	1	1	1	0	0	0	0	0	0	1	0	0	0	0	0	0	0	0	0	0
GI9	SAPA_G0364	MC_04-0873.scaffold_scaffold23_orf00003	Putative uncharacterized protein	Genomic	-	396	-	1430		0	0	0	0	0	0	0	0	0	0	0	0	0	0	1	0	1	1	1	0	1	1	1	0	0	0	0	0	0	1	0	0	0	0	0	0	0	0	0	0
GI9	SAPA_G0365	WS1033.scaffold_scaffold14_orf00005	Putative Rhs protein	Genomic	-	1488	-	1431		0	0	0	0	0	0	0	0	0	0	0	0	0	0	1	0	1	1	1	0	1	1	1	0	0	0	0	0	0	1	0	0	0	0	0	0	0	0	0	0
GI9	SAPA_G0366	WS1033.scaffold_C3218_orf00001	Putative uncharacterized protein	Genomic	-	119	-	1432		0	0	0	0	0	0	0	0	0	0	0	0	0	0	1	0	1	1	1	0	1	1	1	0	0	0	0	0	0	1	0	0	0	0	0	0	0	0	0	0
GI10	SAPA_G0367	DBS_20090461.scaffold_scaffold15_orf00069	Integrase family protein	Phage	-	336	-	1493		0	0	0	0	0	0	0	0	0	0	0	0	0	0	0	0	0	0	0	0	0	0	0	0	0	0	0	0	0	0	0	0	0	0	0	0	0	0	0	0
GI10	SAPA_G0368	DBS_20090461.scaffold_scaffold15_orf00078	Exodeoxyribonuclease VIII from bacteriophage origin	Phage	-	180	-	1494		0	0	0	0	0	0	0	0	0	0	0	0	0	0	0	0	0	0	0	0	0	0	0	0	0	0	0	0	0	0	0	0	0	0	0	0	0	0	0	0
GI10	SAPA_G0369	DBS_20090461.scaffold_scaffold15_orf00081	DNA adenine methylase from prophage	Phage	-	322	dam	1495		0	0	0	0	0	0	0	0	0	0	0	0	0	0	0	0	0	0	0	0	0	0	0	0	0	0	0	0	0	0	0	0	0	0	0	0	0	0	0	0
GI10	SAPA_G0370	DBS_20090461.scaffold_scaffold15_orf00086	Methyltransferase, putative	Phage	-	336	-	1496		0	0	0	0	0	0	0	0	0	0	0	0	0	0	0	0	0	0	0	0	0	0	0	0	0	0	0	0	0	0	0	0	0	0	0	0	0	0	0	0
GI10	SAPA_G0371	DBS_20090461.scaffold_scaffold15_orf00087	Phage replication protein	Phage	-	880	gpa	1497		0	0	0	0	0	0	0	0	0	0	0	0	0	0	0	0	0	0	0	0	0	0	0	0	0	0	0	0	0	0	0	0	0	0	0	0	0	0	0	0
GI10	SAPA_G0372	DBS_20090461.scaffold_scaffold15_orf00089	Putative dna-methyltransferase protein	Phage	-	232	-	1498		0	0	0	0	0	0	0	0	0	0	0	0	0	0	0	0	0	0	0	0	0	0	0	0	0	0	0	0	0	0	0	0	0	0	0	0	0	0	0	0
GI10	SAPA_G0373	DBS_20090461.scaffold_scaffold15_orf00092	Phage capsid portal protein Q	Phage	-	302	-	1499		0	0	0	0	0	0	0	0	0	0	0	0	0	0	0	0	0	0	0	0	0	0	0	0	0	0	0	0	0	0	0	0	0	0	0	0	0	0	0	0
GI10	SAPA_G0374	DBS_20090461.scaffold_scaffold15_orf00094	Phage terminase, ATPase subunit P	Phage	-	574	-	1500		0	0	0	0	0	0	0	0	0	0	0	0	0	0	0	0	0	0	0	0	0	0	0	0	0	0	0	0	0	0	0	0	0	0	0	0	0	0	0	0
GI10	SAPA_G0375	DBS_20090461.scaffold_scaffold15_orf00095	Capsid scaffolding protein O	Phage	-	278	-	1501		0	0	0	0	0	0	0	0	0	0	0	0	0	0	0	0	0	0	0	0	0	0	0	0	0	0	0	0	0	0	0	0	0	0	0	0	0	0	0	0
GI10	SAPA_G0376	DBS_20090461.scaffold_scaffold15_orf00096	Major phage capsid protein N	Phage	-	350	-	1502		0	0	0	0	0	0	0	0	0	0	0	0	0	0	0	0	0	0	0	0	0	0	0	0	0	0	0	0	0	0	0	0	0	0	0	0	0	0	0	0
GI10	SAPA_G0377	DBS_20090461.scaffold_scaffold15_orf00098	Phage terminase, endonuclease small subunit M	Phage	-	288	-	1503		0	0	0	0	0	0	0	0	0	0	0	0	0	0	0	0	0	0	0	0	0	0	0	0	0	0	0	0	0	0	0	0	0	0	0	0	0	0	0	0
GI10	SAPA_G0378	DBS_20090461.scaffold_scaffold15_orf00100	Head completion protein	Phage	-	148	-	1504		0	0	0	0	0	0	0	0	0	0	0	0	0	0	0	0	0	0	0	0	0	0	0	0	0	0	0	0	0	0	0	0	0	0	0	0	0	0	0	0
GI10	SAPA_G0379	DBS_20090461.scaffold_scaffold15_orf00102	Tail protein X from prophage	Phage	-	67	-	1505		0	0	0	0	0	0	0	0	0	0	0	0	0	0	0	0	0	0	0	0	0	0	0	0	0	0	0	0	0	0	0	0	0	0	0	0	0	0	0	0
GI10	SAPA_G0380	DBS_20090461.scaffold_scaffold15_orf00105	Lysozyme	Phage	-	184	-	1506		0	0	0	0	0	0	0	0	0	0	0	0	0	0	0	0	0	0	0	0	0	0	0	0	0	0	0	0	0	0	0	0	0	0	0	0	0	0	0	0
GI10	SAPA_G0381	DBS_20090461.scaffold_scaffold15_orf00106	Probable phage tail protein	Phage	-	132	-	1507		0	0	0	0	0	0	0	0	0	0	0	0	0	0	0	0	0	0	0	0	0	0	0	0	0	0	0	0	0	0	0	0	0	0	0	0	0	0	0	0
GI10	SAPA_G0382	DBS_20090461.scaffold_scaffold15_orf00108	Phage tail completion protein R	Phage	-	150	-	1508		0	0	0	0	0	0	0	0	0	0	0	0	0	0	0	0	0	0	0	0	0	0	0	0	0	0	0	0	0	0	0	0	0	0	0	0	0	0	0	0
GI10	SAPA_G0383	DBS_20090461.scaffold_scaffold15_orf00109	Putative phage tail protein S	Phage	-	214	-	1509		0	0	0	0	0	0	0	0	0	0	0	0	0	0	0	0	0	0	0	0	0	0	0	0	0	0	0	0	0	0	0	0	0	0	0	0	0	0	0	0
GI10	SAPA_G0384	DBS_20090461.scaffold_scaffold15_orf00110	Baseplate assembly protein V	Phage	-	195	-	1510		0	0	0	0	0	0	0	0	0	0	0	0	0	0	0	0	0	0	0	0	0	0	0	0	0	0	0	0	0	0	0	0	0	0	0	0	0	0	0	0
GI10	SAPA_G0385	DBS_20090461.scaffold_scaffold15_orf00111	Protein 25-like lysozyme	Phage	-	123	-	1511		0	0	0	0	0	0	0	0	0	0	0	0	0	0	0	0	0	0	0	0	0	0	0	0	0	0	0	0	0	0	0	0	0	0	0	0	0	0	0	0
GI10	SAPA_G0386	DBS_20090461.scaffold_scaffold15_orf00112	Baseplate J family protein	Phage	-	299	-	1512		0	0	0	0	0	0	0	0	0	0	0	0	0	0	0	0	0	0	0	0	0	0	0	0	0	0	0	0	0	0	0	0	0	0	0	0	0	0	0	0
GI10	SAPA_G0387	DBS_20090461.scaffold_scaffold15_orf00113	Phage tail protein I	Phage	-	164	-	1513		0	0	0	0	0	0	0	0	0	0	0	0	0	0	0	0	0	0	0	0	0	0	0	0	0	0	0	0	0	0	0	0	0	0	0	0	0	0	0	0
GI10	SAPA_G0388	MC_08-0770.scaffold_scaffold21_orf00317	Putative phage tail fiber assembly protein	Phage	-	139	-	1514		0	0	0	0	0	0	0	0	0	0	0	0	0	0	0	0	0	0	0	0	0	0	0	0	0	0	0	0	0	0	0	0	0	0	0	0	0	0	0	0
GI10	SAPA_G0389	MC_08-0770.scaffold_scaffold21_orf00318	Phage tail fiber repeat	Phage	-	721	-	1515		0	0	0	0	0	0	0	0	0	0	0	0	0	0	0	0	0	0	0	0	0	0	0	0	0	0	0	0	0	0	0	0	0	0	0	0	0	0	0	0
GI10	SAPA_G0390	DBS_20090461.scaffold_scaffold15_orf00116	Hypothetical protein	Phage	-	103	-	1516		0	0	0	0	0	0	0	0	0	0	0	0	0	0	0	0	0	0	0	0	0	0	0	0	0	0	0	0	0	0	0	0	0	0	0	0	0	0	0	0
GI10	SAPA_G0391	DBS_20090461.scaffold_scaffold15_orf00119	Phage tail protein	Phage	-	157	-	1517		0	0	0	0	0	0	0	0	0	0	0	0	0	0	0	0	0	0	0	0	0	0	0	0	0	0	0	0	0	0	0	0	0	0	0	0	0	0	0	0
GI10	SAPA_G0392	DBS_20090461.scaffold_scaffold15_orf00123	Putative bacteriophage tail fiber protein T (Tape measure)	Phage	-	908	-	1518		0	0	0	0	0	0	0	0	0	0	0	0	0	0	0	0	0	0	0	0	0	0	0	0	0	0	0	0	0	0	0	0	0	0	0	0	0	0	0	0
GI10	SAPA_G0393	DBS_20090461.scaffold_scaffold15_orf00125	Phage tail protein, P2 GpE family protein	Phage	-	42	-	1519		0	0	0	0	0	0	0	0	0	0	0	0	0	0	0	0	0	0	0	0	0	0	0	0	0	0	0	0	0	0	0	0	0	0	0	0	0	0	0	0
GI10	SAPA_G0394	DBS_20090461.scaffold_scaffold15_orf00126	GpE-like protein	Phage	-	100	-	1520		0	0	0	0	0	0	0	0	0	0	0	0	0	0	0	0	0	0	0	0	0	0	0	0	0	0	0	0	0	0	0	0	0	0	0	0	0	0	0	0
GI10	SAPA_G0395	DBS_20090461.scaffold_scaffold15_orf00128	Major tail tube protein	Phage	-	172	-	1521		0	0	0	0	0	0	0	0	0	0	0	0	0	0	0	0	0	0	0	0	0	0	0	0	0	0	0	0	0	0	0	0	0	0	0	0	0	0	0	0
GI10	SAPA_G0396	DBS_20090461.scaffold_scaffold15_orf00129	Major tail sheath protein	Phage	-	394	-	1522		0	0	0	0	0	0	0	0	0	0	0	0	0	0	0	0	0	0	0	0	0	0	0	0	0	0	0	0	0	0	0	0	0	0	0	0	0	0	0	0
GI10	SAPA_G0397	DBS_20090461.scaffold_scaffold15_orf00130	Bacteriophage late gene control protein D	Phage	-	385	-	1523		0	0	0	0	0	0	0	0	0	0	0	0	0	0	0	0	0	0	0	0	0	0	0	0	0	0	0	0	0	0	0	0	0	0	0	0	0	0	0	0
GI11	SAPA_G0398	DBS_20005023.scaffold_scaffold34_orf00072	Site-specific recombinase, phage integrase family	Phage	-	438	-	1566		0	0	0	0	0	0	0	0	0	0	0	0	0	0	0	0	0	0	0	0	0	0	1	0	0	0	0	0	0	0	0	0	0	0	0	1	0	0	0	0
GI11	SAPA_G0399	DBS_20005023.scaffold_scaffold34_orf00070	Putative excisionase (DUF1233)	Phage	-	79	-	1567		0	0	0	0	0	0	0	0	0	0	0	0	0	0	0	0	0	0	0	0	0	0	1	0	0	0	0	0	0	0	0	0	0	0	0	1	0	0	0	0
GI11	SAPA_G0400	DBS_20005023.scaffold_scaffold34_orf00068	Phage protein	Phage	-	190	-	1568		0	0	0	0	0	0	0	0	0	0	0	0	0	0	0	0	0	0	0	0	0	0	1	0	0	0	0	0	0	0	0	0	0	0	0	1	0	0	0	0
GI11	SAPA_G0401	DBS_20005023.scaffold_scaffold34_orf00067	Putative DnaJ-class molecular chaperone with C-terminal Zn finger domain	Phage	-	320	-	1569		0	0	0	0	0	0	0	0	0	0	0	0	0	0	0	0	0	0	0	0	0	0	1	0	0	0	0	0	0	0	0	0	0	0	0	1	0	0	0	0
GI11	SAPA_G0402	DBS_20005023.scaffold_scaffold34_orf00065	Putative uncharacterized protein	Phage	-	180	-	1570		0	0	0	0	0	0	0	0	0	0	0	0	0	0	0	0	0	0	0	0	0	0	1	0	0	0	0	0	0	0	0	0	0	0	0	1	0	0	0	0
GI11	SAPA_G0403	DBS_20005023.scaffold_scaffold34_orf00063	Phage protein	Phage	-	180	-	1571		0	0	0	0	0	0	0	0	0	0	0	0	0	0	0	0	0	0	0	0	0	0	1	0	0	0	0	0	0	0	0	0	0	0	0	1	0	0	0	0
GI11	SAPA_G0404	DBS_20005023.scaffold_scaffold34_orf00062	Hypothetical prophage protein	Phage	-	276	yfdQ	1572		0	0	0	0	0	0	0	0	0	0	0	0	0	0	0	0	0	0	0	0	0	0	1	0	0	0	0	0	0	0	0	0	0	0	0	1	0	0	0	0
GI11	SAPA_G0405	DBS_20005023.scaffold_scaffold34_orf00060	Predicted bacteriophage protein	Phage	-	124	-	1573		0	0	0	0	0	0	0	0	0	0	0	0	0	0	0	0	0	0	0	0	0	0	1	0	0	0	0	0	0	0	0	0	0	0	0	1	0	0	0	0
GI11	SAPA_G0406	DBS_20005023.scaffold_scaffold34_orf00058	Peptidase S24-like domain protein	Phage	-	148	-	1574		0	0	0	0	0	0	0	0	0	0	0	0	0	0	0	0	0	0	0	0	0	0	1	0	0	0	0	0	0	0	0	0	0	0	0	1	0	0	0	0
GI11	SAPA_G0407	DBS_20005023.scaffold_scaffold34_orf00057	Putative lambda repressor-like DNA-binding domains	Phage	-	75	-	1575		0	0	0	0	0	0	0	0	0	0	0	0	0	0	0	0	0	0	0	0	0	0	1	0	0	0	0	0	0	0	0	0	0	0	0	1	0	0	0	0
GI11	SAPA_G0408	DBS_20005023.scaffold_scaffold34_orf00056	Predicted bacteriophage protein	Phage	-	185	-	1576		0	0	0	0	0	0	0	0	0	0	0	0	0	0	0	0	0	0	0	0	0	0	1	0	0	0	0	0	0	0	0	0	0	0	0	1	0	0	0	0
GI11	SAPA_G0409	DBS_20005023.scaffold_scaffold34_orf00055	Predicted bacteriophage protein	Phage	-	386	-	1577		0	0	0	0	0	0	0	0	0	0	0	0	0	0	0	0	0	0	0	0	0	0	1	0	0	0	0	0	0	0	0	0	0	0	0	1	0	0	0	0
GI11	SAPA_G0410	DBS_20005023.scaffold_scaffold34_orf00051	Phage protein	Phage	-	325	-	1578		0	0	0	0	0	0	0	0	0	0	0	0	0	0	0	0	0	0	0	0	0	0	0	0	0	0	0	0	0	0	0	0	0	0	0	1	0	0	0	0
GI11	SAPA_G0411	DBS_20005023.scaffold_scaffold34_orf00050	Phage protein	Phage	-	158	-	1579		0	0	0	0	0	0	0	0	0	0	0	0	0	0	0	0	0	0	0	0	0	0	0	0	0	0	0	0	0	0	0	0	0	0	0	1	0	0	0	0
GI11	SAPA_G0412	DBS_20005023.scaffold_scaffold34_orf00048	Cytosine-specific methyltransferase	Phage	-	294	-	1580		0	0	0	0	0	0	0	0	0	0	0	0	0	0	0	0	0	0	0	0	0	0	0	0	0	0	0	0	0	0	0	0	0	0	0	1	0	0	0	0
GI11	SAPA_G0413	WR-01-11238_111212_5.remap_scaffold44_orf00149	Phage O protein	Phage	-	320	-	1581		0	0	0	0	0	0	0	0	0	0	0	0	0	0	0	0	0	0	0	0	0	0	1	0	0	0	0	0	0	0	0	0	0	0	0	0	0	0	0	0
GI11	SAPA_G0414	WR-01-11238_111212_5.remap_scaffold44_orf00151	Putative DNA methyltransferase	Phage	-	293	-	1582		0	0	0	0	0	0	0	0	0	0	0	0	0	0	0	0	0	0	0	0	0	0	1	0	0	0	0	0	0	0	0	0	0	0	0	0	0	0	0	0
GI11	SAPA_G0415	WR-01-11238_111212_5.remap_scaffold44_orf00152	DNA (Cytosine-5-)-methyltransferase	Phage	-	577	dcm	1583		0	0	0	0	0	0	0	0	0	0	0	0	0	0	0	0	0	0	0	0	0	0	1	0	0	0	0	0	0	0	0	0	0	0	0	0	0	0	0	0
GI11	SAPA_G0416	DBS_20005023.scaffold_scaffold34_orf00047	Crossover junction endodeoxyribonuclease rusA	Phage	-	103	rusA	1584		0	0	0	0	0	0	0	0	0	0	0	0	0	0	0	0	0	0	0	0	0	0	1	0	0	0	0	0	0	0	0	0	0	0	0	1	0	0	0	0
GI11	SAPA_G0417	DBS_20005023.scaffold_scaffold34_orf00046	Phage protein	Phage	-	287	-	1585		0	0	0	0	0	0	0	0	0	0	0	0	0	0	0	0	0	0	0	0	0	0	1	0	0	0	0	0	0	0	0	0	0	0	0	1	0	0	0	0
GI11	SAPA_G0418	STM2240	putative cytoplasmic protein	Phage	-	329	-	1586		0	0	0	0	0	0	0	0	0	0	0	0	0	0	0	0	0	0	0	0	0	0	1	0	0	0	0	0	0	0	0	0	0	0	0	1	0	0	0	0
GI11	SAPA_G0419	DBS_20005023.scaffold_scaffold34_orf00044	Putative uncharacterized protein	Phage	-	164	-	1587		0	0	0	0	0	0	0	0	0	0	0	0	0	0	0	0	0	0	0	0	0	0	1	0	0	0	0	0	0	0	0	0	0	0	0	1	0	0	0	0
GI11	SAPA_G0420	DBS_20005023.scaffold_scaffold34_orf00041	Putative DNA adenine methyltransferase encoded by prophage	Phage	-	61	-	1588		0	0	0	0	0	0	0	0	0	0	0	0	0	0	0	0	0	0	0	0	0	0	1	0	0	0	0	0	0	0	0	0	0	0	0	1	0	0	0	0
GI11	SAPA_G0421	t1901	putative prophage membrane protein	Phage	-	129	-	1589		0	0	0	0	0	0	0	0	0	0	0	0	0	0	0	0	0	0	0	0	0	0	1	0	0	0	0	0	0	0	0	0	0	0	0	1	0	0	0	0
GI11	SAPA_G0422	t1900	putative prophage membrane protein	Phage	-	93	-	1590		0	0	0	0	0	0	0	0	0	0	0	0	0	0	0	0	0	0	0	0	0	0	1	0	0	0	0	0	0	0	0	0	0	0	0	1	0	0	0	0
GI11	SAPA_G0423	DBS_20005023.scaffold_scaffold34_orf00037	Lytic enzyme	Phage	-	205	-	1591		0	0	0	0	0	0	0	0	0	0	0	0	0	0	0	0	0	0	0	0	0	0	1	0	0	0	0	0	0	0	0	0	0	0	0	1	0	0	0	0
GI11	SAPA_G0424	DBS_20005023.scaffold_scaffold34_orf00036	Protein gp55	Phage	-	181	-	1592		0	0	0	0	0	0	0	0	0	0	0	0	0	0	0	0	0	0	0	0	0	0	1	0	0	0	0	0	0	0	0	0	0	0	0	1	0	0	0	0
GI11	SAPA_G0425	DBS_20001356.scaffold_scaffold31_orf00138	Putative uncharacterized protein	Phage	-	168	-	1593		0	0	0	0	0	0	0	0	0	0	0	0	0	0	0	0	0	0	0	0	0	0	1	0	0	0	0	0	0	0	0	0	0	0	0	1	0	0	0	0
GI11	SAPA_G0426	DBS_20005023.scaffold_scaffold34_orf00034	Predicted terminase small subunit	Phage	-	182	-	1594		0	0	0	0	0	0	0	0	0	0	0	0	0	0	0	0	0	0	0	0	0	0	1	0	0	0	0	0	0	0	0	0	0	0	0	1	0	0	0	0
GI11	SAPA_G0427	DBS_20005023.scaffold_scaffold34_orf00032	Phage terminase large subunit	Phage	-	644	-	1595		0	0	0	0	0	0	0	0	0	0	0	0	0	0	0	0	0	0	0	0	0	0	1	0	0	0	0	0	0	0	0	0	0	0	0	1	0	0	0	0
GI11	SAPA_G0428	DBS_20005023.scaffold_scaffold34_orf00031	GpW	Phage	-	68	-	1596		0	0	0	0	0	0	0	0	0	0	0	0	0	0	0	0	0	0	0	0	0	0	1	0	0	0	0	0	0	0	0	0	0	0	0	1	0	0	0	0
GI11	SAPA_G0429	DBS_20062828_111212_2.remap_scaffold15_orf00109	Phage portal protein, lambda family	Phage	-	540	-	1597		0	0	0	0	0	0	0	0	0	0	0	0	0	0	0	0	0	0	0	0	0	0	1	0	0	0	0	0	0	0	0	0	0	0	0	1	0	0	0	0
GI11	SAPA_G0430	DBS_20005023.scaffold_scaffold34_orf00027	Head-tail preconnector-like protein	Phage	-	499	-	1598		0	0	0	0	0	0	0	0	0	0	0	0	0	0	0	0	0	0	0	0	0	0	1	0	0	0	0	0	0	0	0	0	0	0	0	1	0	0	0	0
GI11	SAPA_G0431	DBS_20005023.scaffold_scaffold34_orf00025	Bacteriophage lambda head decoration protein D	Phage	-	116	-	1599		0	0	0	0	0	0	0	0	0	0	0	0	0	0	0	0	0	0	0	0	0	0	1	0	0	0	0	0	0	0	0	0	0	0	0	1	0	0	0	0
GI11	SAPA_G0432	DBS_20005023.scaffold_scaffold34_orf00024	Phage major capsid protein E	Phage	-	343	-	1600		0	0	0	0	0	0	0	0	0	0	0	0	0	0	0	0	0	0	0	0	0	0	1	0	0	0	0	0	0	0	0	0	0	0	0	1	0	0	0	0
GI11	SAPA_G0433	DBS_20005023.scaffold_scaffold34_orf00023	Gifsy-1 prophage DNA packaging protein gp9	Phage	-	120	-	1601		0	0	0	0	0	0	0	0	0	0	0	0	0	0	0	0	0	0	0	0	0	0	1	0	0	0	0	0	0	0	0	0	0	0	0	1	0	0	0	0
GI11	SAPA_G0434	STM2601	Gifsy-1 prophage protein	Phage	-	127	-	1602		0	0	0	0	0	0	0	0	0	0	0	0	0	0	0	0	0	0	0	0	0	0	1	0	0	0	0	0	0	0	0	0	0	0	0	1	0	0	0	0
GI11	SAPA_G0435	STM2600	Gifsy-1 prophage	Phage	-	192	-	1603		0	0	0	0	0	0	0	0	0	0	0	0	0	0	0	0	0	0	0	0	0	0	1	0	0	0	0	0	0	0	0	0	0	0	0	1	0	0	0	0
GI11	SAPA_G0436	STM2598	Gifsy-1 prophage protein	Phage	-	133	-	1604		0	0	0	0	0	0	0	0	0	0	0	0	0	0	0	0	0	0	0	0	0	0	1	0	0	0	0	0	0	0	0	0	0	0	0	1	0	0	0	0
GI11	SAPA_G0437	STM2597	Gifsy-1 prophage protein	Phage	-	248	-	1605		0	0	0	0	0	0	0	0	0	0	0	0	0	0	0	0	0	0	0	0	0	0	1	0	0	0	0	0	0	0	0	0	0	0	0	1	0	0	0	0
GI11	SAPA_G0438	DBS_20005023.scaffold_scaffold34_orf00017	Phage minor tail protein G	Phage	-	132	-	1606		0	0	0	0	0	0	0	0	0	0	0	0	0	0	0	0	0	0	0	0	0	0	1	0	0	0	0	0	0	0	0	0	0	0	0	1	0	0	0	0
GI11	SAPA_G0439	STM2595	Gifsy-1 prophage protein	Phage	-	112	-	1607		0	0	0	0	0	0	0	0	0	0	0	0	0	0	0	0	0	0	0	0	0	0	1	0	0	0	0	0	0	0	0	0	0	0	0	1	0	0	0	0
GI11	SAPA_G0440	DBS_20062828_111212_2.remap_scaffold15_orf00122	Gifsy-1 prophage VmtH	Phage	-	1032	-	1608		0	0	0	0	0	0	0	0	0	0	0	0	0	0	0	0	0	0	0	0	0	0	1	0	0	0	0	0	0	0	0	0	0	0	0	1	0	0	0	0
GI11	SAPA_G0441	DBS_20005023.scaffold_scaffold34_orf00013	Phage minor tail protein	Phage	-	110	-	1609		0	0	0	0	0	0	0	0	0	0	0	0	0	0	0	0	0	0	0	0	0	0	1	0	0	0	0	0	0	0	0	0	0	0	0	1	0	0	0	0
GI11	SAPA_G0442	DBS_20005023.scaffold_scaffold34_orf00012	Phage minor tail protein L	Phage	-	233	-	1610		0	0	0	0	0	0	0	0	0	0	0	0	0	0	0	0	0	0	0	0	0	0	1	0	0	0	0	0	0	0	0	0	0	0	0	1	0	0	0	0
GI11	SAPA_G0443	DBS_20005023.scaffold_scaffold34_orf00011	Prophage tail assembly protein	Phage	-	212	-	1611		0	0	0	0	0	0	0	0	0	0	0	0	0	0	0	0	0	0	0	0	0	0	1	0	0	0	0	0	0	0	0	0	0	0	0	1	0	0	0	0
GI11	SAPA_G0444	STM2590	Gifsy-1 prophage protein	Phage	-	215	-	1612		0	0	0	0	0	0	0	0	0	0	0	0	0	0	0	0	0	0	0	0	0	0	1	0	0	0	0	0	0	0	0	0	0	0	0	1	0	0	0	0
GI11	SAPA_G0445	DBS_20005023.scaffold_scaffold34_orf00006	Phage tail protein, host specificity factor	Phage	-	1121	-	1613		0	0	0	0	0	0	0	0	0	0	0	0	0	0	0	0	0	0	0	0	0	0	1	0	0	0	0	0	0	0	0	0	0	0	0	1	0	0	0	0
GI11	SAPA_G0446	DBS_20005023.scaffold_scaffold34_orf00003	Predicted phage protein	Phage	-	81	-	1614		0	0	0	0	0	0	0	0	0	0	0	0	0	0	0	0	0	0	0	0	0	0	1	0	0	0	0	0	0	0	0	0	0	0	0	1	0	0	0	0
GI11	SAPA_G0447	STM1049	Gifsy-2 prophage probable tail fiber protein	Phage	-	812	-	1615		0	0	0	0	0	0	0	0	0	0	0	0	0	0	0	0	0	0	0	0	0	0	1	0	0	0	0	0	0	0	0	0	0	0	0	1	0	0	0	0
GI11	SAPA_G0448	WR-01-11238_111212_5.remap_C2417_orf00006	Side tail fiber protein	Phage	-	161	stf	1616		0	0	0	0	0	0	0	0	0	0	0	0	0	0	0	0	0	0	0	0	0	0	1	0	0	0	0	0	0	0	0	0	0	0	0	1	0	0	0	0
GI11	SAPA_G0449	DBS_20005023.scaffold_C2235_orf00004	Hypothetical prophage protein	Phage	-	173	-	1617		0	0	0	0	0	0	0	0	0	0	0	0	0	0	0	0	0	0	0	0	0	0	1	0	0	0	0	0	0	0	0	0	0	0	0	1	0	0	0	0
GI11	SAPA_G0450	DBS_20005023.scaffold_C2235_orf00003	Tail fiber assembly protein	Phage	-	184	gpg	1618		0	0	0	0	0	0	0	0	0	0	0	0	0	0	0	0	0	0	0	0	0	0	1	0	0	0	0	0	0	0	0	0	0	0	0	1	0	0	0	0
GI11	SAPA_G0451	DBS_20005023.scaffold_C2235_orf00002	Tail fiber repeat 2 protein	Phage	-	111	-	1619		0	0	0	0	0	0	0	0	0	0	0	0	0	0	0	0	0	0	0	0	0	0	1	0	0	0	0	0	0	0	0	0	0	0	0	1	0	0	0	0
GI11	SAPA_G0453	t0880	UmuD protein	Phage	-	139	umuD	1621		0	0	0	0	0	0	0	0	0	0	0	0	0	0	0	0	0	0	0	0	0	0	1	0	0	0	0	0	0	0	0	0	0	0	0	1	0	0	0	0
GI11	SAPA_G0454	DBS_20005023.scaffold_C2281_orf00004	DNA polymerase V subunit UmuC	Phage	-	423	umuC	1622		0	0	0	0	0	0	0	0	0	0	0	0	0	0	0	0	0	0	0	0	0	0	1	0	0	0	0	0	0	0	0	0	0	0	0	1	0	0	0	0
GI11	SAPA_G0455	STM1053	Gifsy-2 prophage protein	Phage	-	208	-	1623		0	0	0	0	0	0	0	0	0	0	0	0	0	0	0	0	0	0	0	0	0	0	1	0	0	0	0	0	0	0	0	0	0	0	0	1	0	0	0	0
GI12	SAPA_G0456	MC_08-0770.scaffold_scaffold11_orf00172	Lambda integrase	Phage	-	362	-	1655		0	0	0	0	0	0	0	0	0	0	0	0	0	0	0	0	0	0	0	0	0	0	0	0	0	0	0	0	0	0	0	0	0	0	0	0	0	0	0	1
GI12	SAPA_G0457	MC_08-0770.scaffold_scaffold11_orf00173	Excisionase domain protein	Phage	-	91	-	1656		0	0	0	0	0	0	0	0	0	0	0	0	0	0	0	0	0	0	0	0	0	0	0	0	0	0	0	0	0	0	0	0	0	0	0	0	0	0	0	1
GI12	SAPA_G0458	MC_08-0770.scaffold_scaffold11_orf00176	C4-type zinc finger protein, DksA/TraR family	Phage	-	74	-	1657		0	0	0	0	0	0	0	0	0	0	0	0	0	0	0	0	0	0	0	0	0	0	0	0	0	0	0	0	0	0	0	0	0	0	0	0	0	0	0	1
GI12	SAPA_G0459	MC_08-0770.scaffold_scaffold11_orf00178	Cytosine-specific methyltransferase	Phage	-	590	-	1658		0	0	0	0	0	0	0	0	0	0	0	0	0	0	0	0	0	0	0	0	0	0	0	0	0	0	0	0	0	0	0	0	0	0	0	0	0	0	0	1
GI12	SAPA_G0460	MC_08-0770.scaffold_scaffold11_orf00180	Probable regulatory protein	Phage	-	144	-	1659		0	0	0	0	0	0	0	0	0	0	0	0	0	0	0	0	0	0	0	0	0	0	0	0	0	0	0	0	0	0	0	0	0	0	0	0	0	0	0	1
GI12	SAPA_G0461	MC_08-0770.scaffold_scaffold11_orf00181	Exonuclease (Fragment)	Phage	-	207	-	1660		0	0	0	0	0	0	0	0	0	0	0	0	0	0	0	0	0	0	0	0	0	0	0	0	0	0	0	0	0	0	0	0	0	0	0	0	0	0	0	1
GI12	SAPA_G0462	MC_08-0770.scaffold_scaffold11_orf00182	Recombination protein bet	Phage	-	242	-	1661		0	0	0	0	0	0	0	0	0	0	0	0	0	0	0	0	0	0	0	0	0	0	0	0	0	0	0	0	0	0	0	0	0	0	0	0	0	0	0	1
GI12	SAPA_G0463	MC_08-0770.scaffold_scaffold11_orf00184	Host-nuclease inhibitor protein Gam	Phage	-	99	-	1662		0	0	0	0	0	0	0	0	0	0	0	0	0	0	0	0	0	0	0	0	0	0	0	0	0	0	0	0	0	0	0	0	0	0	0	0	0	0	0	1
GI12	SAPA_G0464	MC_08-0770.scaffold_scaffold11_orf00185	hypothetical protein	Phage	-	313	-	1663		0	0	0	0	0	0	0	0	0	0	0	0	0	0	0	0	0	0	0	0	0	0	0	0	0	0	0	0	0	0	0	0	0	0	0	0	0	0	0	1
GI12	SAPA_G0465	MC_08-0770.scaffold_scaffold11_orf00186	Pathogenesis-related transcriptional factor and ERF protein	Phage	-	67	-	1664		0	0	0	0	0	0	0	0	0	0	0	0	0	0	0	0	0	0	0	0	0	0	0	0	0	0	0	0	0	0	0	0	0	0	0	0	0	0	0	1
GI12	SAPA_G0466	MC_08-0770.scaffold_scaffold11_orf00187	Prophage Kil protein	Phage	-	61	kil	1665		0	0	0	0	0	0	0	0	0	0	0	0	0	0	0	0	0	0	0	0	0	0	0	0	0	0	0	0	0	0	0	0	0	0	0	0	0	0	0	1
GI12	SAPA_G0467	MC_08-0770.scaffold_scaffold11_orf00190	Peptidase S24-like domain protein	Phage	-	117	-	1666		0	0	0	0	0	0	0	0	0	0	0	0	0	0	0	0	0	0	0	0	0	0	0	0	0	0	0	0	0	0	0	0	0	0	0	0	0	0	0	1
GI12	SAPA_G0468	MC_08-0770.scaffold_scaffold11_orf00192	Phage transcriptional regulatory protein	Phage	-	76	-	1667		0	0	0	0	0	0	0	0	0	0	0	0	0	0	0	0	0	0	0	0	0	0	0	0	0	0	0	0	0	0	0	0	0	0	0	0	0	0	0	1
GI12	SAPA_G0469	MC_08-0770.scaffold_scaffold11_orf00193	Bacteriophage CII family protein	Phage	-	74	-	1668		0	0	0	0	0	0	0	0	0	0	0	0	0	0	0	0	0	0	0	0	0	0	0	0	0	0	0	0	0	0	0	0	0	0	0	0	0	0	0	1
GI12	SAPA_G0470	MC_08-0770.scaffold_scaffold11_orf00194	Phage-related DNA-binding protein	Phage	-	273	-	1669		0	0	0	0	0	0	0	0	0	0	0	0	0	0	0	0	0	0	0	0	0	0	0	0	0	0	0	0	0	0	0	0	0	0	0	0	0	0	0	1
GI12	SAPA_G0471	MC_08-0770.scaffold_scaffold11_orf00195	Gene O protein	Phage	-	299	-	1670		0	0	0	0	0	0	0	0	0	0	0	0	0	0	0	0	0	0	0	0	0	0	0	0	0	0	0	0	0	0	0	0	0	0	0	0	0	0	0	1
GI12	SAPA_G0472	MC_08-0770.scaffold_scaffold11_orf00196	Phage replicative helicase, DnaB family	Phage	-	479	-	1671		0	0	0	0	0	0	0	0	0	0	0	0	0	0	0	0	0	0	0	0	0	0	0	0	0	0	0	0	0	0	0	0	0	0	0	0	0	0	0	1
GI12	SAPA_G0473	MC_08-0770.scaffold_scaffold11_orf00200	Flagellin FlaG	Phage	-	120	-	1672		0	0	0	0	0	0	0	0	0	0	0	0	0	0	0	0	0	0	0	0	0	0	0	0	0	0	0	0	0	0	0	0	0	0	0	0	0	0	0	1
GI12	SAPA_G0474	MC_08-0770.scaffold_scaffold11_orf00203	Hypothetical protein	Phage	-	175	-	1673		0	0	0	0	0	0	0	0	0	0	0	0	0	0	0	0	0	0	0	0	0	0	0	0	0	0	0	0	0	0	0	0	0	0	0	0	0	0	0	1
GI12	SAPA_G0475	MC_08-0770.scaffold_scaffold11_orf00205	Conserved predicted protein	Phage	-	177	-	1674		0	0	0	0	0	0	0	0	0	0	0	0	0	0	0	0	0	0	0	0	0	0	0	0	0	0	0	0	0	0	0	0	0	0	0	0	0	0	0	1
GI12	SAPA_G0476	MC_08-0770.scaffold_scaffold11_orf00207	Putative uncharacterized protein	Phage	-	206	-	1675		0	0	0	0	0	0	0	0	0	0	0	0	0	0	0	0	0	0	0	0	0	0	0	0	0	0	0	0	0	0	0	0	0	0	0	0	0	0	0	1
GI12	SAPA_G0477	MC_08-0770.scaffold_scaffold11_orf00209	YbcN in lambdoid DLP12 prophage region	Phage	-	152	-	1676		0	0	0	0	0	0	0	0	0	0	0	0	0	0	0	0	0	0	0	0	0	0	0	0	0	0	0	0	0	0	0	0	0	0	0	0	0	0	0	1
GI12	SAPA_G0478	MC_08-0770.scaffold_scaffold11_orf00212	Bacteriophage Lambda NinG	Phage	-	200	-	1677		0	0	0	0	0	0	0	0	0	0	0	0	0	0	0	0	0	0	0	0	0	0	0	0	0	0	0	0	0	0	0	0	0	0	0	0	0	0	0	1
GI12	SAPA_G0479	MC_08-0770.scaffold_scaffold11_orf00214	Gifsy-1 prophage RegQ	Phage	-	235	-	1678		0	0	0	0	0	0	0	0	0	0	0	0	0	0	0	0	0	0	0	0	0	0	0	0	0	0	0	0	0	0	0	0	0	0	0	0	0	0	0	1
GI12	SAPA_G0480	MC_08-0770.scaffold_scaffold11_orf00216	Lysozyme	Phage	-	164	-	1679		0	0	0	0	0	0	0	0	0	0	0	0	0	0	0	0	0	0	0	0	0	0	0	0	0	0	0	0	0	0	0	0	0	0	0	0	0	0	0	1
GI12	SAPA_G0481	MC_08-0770.scaffold_scaffold11_orf00217	Putative Rz1 lytic protein	Phage	-	38	-	1680		0	0	0	0	0	0	0	0	0	0	0	0	0	0	0	0	0	0	0	0	0	0	0	0	0	0	0	0	0	0	0	0	0	0	0	0	0	0	0	1
GI12	SAPA_G0482	MC_08-0770.scaffold_scaffold11_orf00219	Putative bacteriophage protein	Phage	-	261	-	1681		0	0	0	0	0	0	0	0	0	0	0	0	0	0	0	0	0	0	0	0	0	0	0	0	0	0	0	0	0	0	0	0	0	0	0	0	0	0	0	1
GI12	SAPA_G0483	MC_08-0770.scaffold_scaffold11_orf00221	Phage terminase, large subunit, PBSX family	Phage	-	443	-	1682		0	0	0	0	0	0	0	0	0	0	0	0	0	0	0	0	0	0	0	0	0	0	0	0	0	0	0	0	0	0	0	0	0	0	0	0	0	0	0	1
GI12	SAPA_G0484	MC_08-0770.scaffold_scaffold11_orf00223	Predicted portal protein	Phage	-	483	-	1683		0	0	0	0	0	0	0	0	0	0	0	0	0	0	0	0	0	0	0	0	0	0	0	0	0	0	0	0	0	0	0	0	0	0	0	0	0	0	0	1
GI12	SAPA_G0485	MC_08-0770.scaffold_scaffold11_orf00224	Phage Mu protein F like protein	Phage	-	214	-	1684		0	0	0	0	0	0	0	0	0	0	0	0	0	0	0	0	0	0	0	0	0	0	0	0	0	0	0	0	0	0	0	0	0	0	0	0	0	0	0	1
GI12	SAPA_G0486	MC_08-0770.scaffold_scaffold11_orf00226	hypothetical protein	Phage	-	401	-	1685		0	0	0	0	0	0	0	0	0	0	0	0	0	0	0	0	0	0	0	0	0	0	0	0	0	0	0	0	0	0	0	0	0	0	0	0	0	0	0	1
GI12	SAPA_G0487	MC_08-0770.scaffold_scaffold11_orf00227	bacteriophage protein	Phage	-	165	-	1686		0	0	0	0	0	0	0	0	0	0	0	0	0	0	0	0	0	0	0	0	0	0	0	0	0	0	0	0	0	0	0	0	0	0	0	0	0	0	0	1
GI12	SAPA_G0488	MC_08-0770.scaffold_scaffold11_orf00228	Putative bacteriophage protein	Phage	-	313	-	1687		0	0	0	0	0	0	0	0	0	0	0	0	0	0	0	0	0	0	0	0	0	0	0	0	0	0	0	0	0	0	0	0	0	0	0	0	0	0	0	1
GI12	SAPA_G0489	MC_08-0770.scaffold_scaffold11_orf00229	Conserved domain protein	Phage	-	113	-	1688		0	0	0	0	0	0	0	0	0	0	0	0	0	0	0	0	0	0	0	0	0	0	0	0	0	0	0	0	0	0	0	0	0	0	0	0	0	0	0	1
GI12	SAPA_G0490	MC_08-0770.scaffold_scaffold11_orf00230	Hypothetical phage protein	Phage	-	139	-	1689		0	0	0	0	0	0	0	0	0	0	0	0	0	0	0	0	0	0	0	0	0	0	0	0	0	0	0	0	0	0	0	0	0	0	0	0	0	0	0	1
GI12	SAPA_G0491	MC_08-0770.scaffold_scaffold11_orf00231	Putative bacteriophage protein	Phage	-	170	-	1690		0	0	0	0	0	0	0	0	0	0	0	0	0	0	0	0	0	0	0	0	0	0	0	0	0	0	0	0	0	0	0	0	0	0	0	0	0	0	0	1
GI12	SAPA_G0492	MC_08-0770.scaffold_scaffold11_orf00232	Hypothetical phage protein	Phage	-	135	-	1691		0	0	0	0	0	0	0	0	0	0	0	0	0	0	0	0	0	0	0	0	0	0	0	0	0	0	0	0	0	0	0	0	0	0	0	0	0	0	0	1
GI12	SAPA_G0493	MC_08-0770.scaffold_scaffold11_orf00233	bacteriophage protein	Phage	-	184	-	1692		0	0	0	0	0	0	0	0	0	0	0	0	0	0	0	0	0	0	0	0	0	0	0	0	0	0	0	0	0	0	0	0	0	0	0	0	0	0	0	1
GI12	SAPA_G0494	MC_08-0770.scaffold_scaffold11_orf00234	Hypothetical prophage protein	Phage	-	385	-	1693		0	0	0	0	0	0	0	0	0	0	0	0	0	0	0	0	0	0	0	0	0	0	0	0	0	0	0	0	0	0	0	0	0	0	0	0	0	0	0	1
GI12	SAPA_G0495	MC_08-0770.scaffold_scaffold11_orf00236	Putative bacteriophage protein	Phage	-	147	-	1694		0	0	0	0	0	0	0	0	0	0	0	0	0	0	0	0	0	0	0	0	0	0	0	0	0	0	0	0	0	0	0	0	0	0	0	0	0	0	0	1
GI12	SAPA_G0496	MC_08-0770.scaffold_scaffold11_orf00237	Putative bacteriophage protein	Phage	-	149	-	1695		0	0	0	0	0	0	0	0	0	0	0	0	0	0	0	0	0	0	0	0	0	0	0	0	0	0	0	0	0	0	0	0	0	0	0	0	0	0	0	1
GI12	SAPA_G0497	MC_08-0770.scaffold_scaffold11_orf00239	Lytic transglycosylase catalytic	Phage	-	654	-	1696		0	0	0	0	0	0	0	0	0	0	0	0	0	0	0	0	0	0	0	0	0	0	0	0	0	0	0	0	0	0	0	0	0	0	0	0	0	0	0	1
GI12	SAPA_G0498	MC_08-0770.scaffold_scaffold11_orf00240	bacteriophage protein	Phage	-	197	-	1697		0	0	0	0	0	0	0	0	0	0	0	0	0	0	0	0	0	0	0	0	0	0	0	0	0	0	0	0	0	0	0	0	0	0	0	0	0	0	0	1
GI12	SAPA_G0499	MC_08-0770.scaffold_scaffold11_orf00242	bacteriophage protein	Phage	-	101	-	1698		0	0	0	0	0	0	0	0	0	0	0	0	0	0	0	0	0	0	0	0	0	0	0	0	0	0	0	0	0	0	0	0	0	0	0	0	0	0	0	1
GI12	SAPA_G0500	MC_08-0770.scaffold_scaffold11_orf00243	Putative bacteriophage protein	Phage	-	357	-	1699		0	0	0	0	0	0	0	0	0	0	0	0	0	0	0	0	0	0	0	0	0	0	0	0	0	0	0	0	0	0	0	0	0	0	0	0	0	0	0	1
GI12	SAPA_G0501	MC_08-0770.scaffold_scaffold11_orf00245	Similar to unknown bacteriophage protein	Phage	-	252	-	1700		0	0	0	0	0	0	0	0	0	0	0	0	0	0	0	0	0	0	0	0	0	0	0	0	0	0	0	0	0	0	0	0	0	0	0	0	0	0	0	1
GI12	SAPA_G0502	MC_08-0770.scaffold_scaffold11_orf00246	bacteriophage protein	Phage	-	118	-	1701		0	0	0	0	0	0	0	0	0	0	0	0	0	0	0	0	0	0	0	0	0	0	0	0	0	0	0	0	0	0	0	0	0	0	0	0	0	0	0	1
GI12	SAPA_G0503	MC_08-0770.scaffold_scaffold11_orf00247	Phage Mu protein gp 47	Phage	-	397	-	1702		0	0	0	0	0	0	0	0	0	0	0	0	0	0	0	0	0	0	0	0	0	0	0	0	0	0	0	0	0	0	0	0	0	0	0	0	0	0	0	1
GI12	SAPA_G0504	MC_08-0770.scaffold_scaffold11_orf00249	Putative bacteriophage protein	Phage	-	227	-	1703		0	0	0	0	0	0	0	0	0	0	0	0	0	0	0	0	0	0	0	0	0	0	0	0	0	0	0	0	0	0	0	0	0	0	0	0	0	0	0	1
GI12	SAPA_G0505	MC_08-0770.scaffold_scaffold11_orf00250	Fels-2 prophage Pin	Phage	-	256	pin	1704		0	0	0	0	0	0	0	0	0	0	0	0	0	0	0	0	0	0	0	0	0	0	0	0	0	0	0	0	0	0	0	0	0	0	0	0	0	0	0	1
GI12	SAPA_G0506	MC_08-0770.scaffold_scaffold11_orf00252	Tail spike protein	Phage	-	413	-	1705		0	0	0	0	0	0	0	0	0	0	0	0	0	0	0	0	0	0	0	0	0	0	0	0	0	0	0	0	0	0	0	0	0	0	0	0	0	0	0	1
GI12	SAPA_G0507	MC_08-0770.scaffold_scaffold11_orf00254	Hypothetical protein	Phage	-	378	-	1706		0	0	0	0	0	0	0	0	0	0	0	0	0	0	0	0	0	0	0	0	0	0	0	0	0	0	0	0	0	0	0	0	0	0	0	0	0	0	0	1
GI13	SAPA_G0508	SeAg_B1495	methyl-accepting chemotaxis sensory transducer	Genomic	-	370	-	1937		1	1	1	1	1	1	1	1	1	1	1	1	1	1	1	1	1	1	1	1	1	1	1	1	1	1	1	1	1	1	1	1	1	1	1	1	1	1	1	1
GI13	SAPA_G0509	SeAg_B1496	zinc transport protein ZntB	Genomic	-	327	zntB	1938		1	1	1	1	1	1	1	1	1	1	1	1	1	1	1	1	1	1	1	1	1	1	1	1	1	1	1	1	1	1	1	1	1	1	1	1	1	1	1	1
GI13	SAPA_G0510	SeAg_B1498	ATP-independent RNA helicase DbpA	Genomic	-	457	-	1939		1	1	1	1	1	1	1	1	1	1	1	1	1	1	1	1	1	1	1	1	1	1	1	1	1	1	1	1	1	1	1	1	1	1	1	1	1	1	1	1
GI14	SAPA_G0511	MC_05-0209.scaffold_scaffold25_orf00166	CDP-alcohol phosphatidyltransferase family protein	Genomic	-	199	-	1952		0	0	0	0	0	0	0	0	0	0	0	0	0	0	0	0	0	0	0	0	0	0	0	0	0	0	0	0	0	0	0	0	0	0	0	0	0	0	0	0
GI14	SAPA_G0512	WS0243.scaffold_scaffold27_orf00165	Cytidylyltransferase	Genomic	-	306	-	1953		0	0	0	0	0	0	0	0	0	0	0	0	0	0	0	0	0	0	0	0	0	0	0	0	0	0	0	0	0	0	0	0	0	0	0	0	0	0	0	0
GI14	SAPA_G0513	WS0243.scaffold_scaffold27_orf00166	Acyltransferase	Genomic	-	172	-	1954		0	0	0	0	0	0	0	0	0	0	0	0	0	0	0	0	0	0	0	0	0	0	0	0	0	0	0	0	0	0	0	0	0	0	0	0	0	0	0	0
GI14	SAPA_G0514	MC_05-0209.scaffold_scaffold25_orf00170	Alpha/beta hydrolase fold family protein	Genomic	-	560	ynbC	1955		0	0	0	0	0	0	0	0	0	0	0	0	0	0	0	0	0	0	0	0	0	0	0	0	0	0	0	0	0	0	0	0	0	0	0	0	0	0	0	0
GI14	SAPA_G0515	WS0243.scaffold_scaffold27_orf00170	Dual specificity phosphatase, catalytic domain protein	Genomic	-	437	ynbD	1956		0	0	0	0	0	0	0	0	0	0	0	0	0	0	0	0	0	0	0	0	0	0	0	0	0	0	0	0	0	0	0	0	0	0	0	0	0	0	0	0
GI14	SAPA_G0516	WS0243.scaffold_scaffold27_orf00172	Putative membrane protein	Genomic	-	96	-	1957		0	0	0	0	0	0	0	0	0	0	0	0	0	0	0	0	0	0	0	0	0	0	0	0	0	0	0	0	0	0	0	0	0	0	0	0	0	0	0	0
GI14	SAPA_G0517	SeAg_B1513	glutathione-dependent formaldehyde-activating, GFA	Genomic	-	149	-	1958		1	1	1	1	1	1	1	1	1	1	1	1	1	1	1	1	1	1	1	1	1	1	1	1	1	1	1	1	1	1	1	1	1	1	1	1	1	1	1	1
GI15	SAPA_G0518	SeAg_B1613	LysR substrate binding domain protein	Genomic	-	302	-	2056		1	1	1	1	1	1	1	1	1	1	1	1	1	1	1	1	1	1	1	1	1	1	1	1	1	1	1	1	1	1	1	1	1	1	1	1	1	1	1	1
GI15	SAPA_G0519	0309W51997_111212_1.remap_C2808_orf00002	Putative uncharacterized protein	Genomic	-	103	-	2057		0	0	0	0	0	0	0	0	0	0	0	0	0	0	1	0	0	0	0	0	0	0	0	0	0	0	0	0	0	0	0	0	0	0	0	0	0	0	0	0
GI15	SAPA_G0520	0309W51997_111212_1.remap_C2808_orf00003	general secretion pathway protein D	Genomic	-	422	-	2058		0	0	0	0	0	0	0	0	0	0	0	0	0	0	1	0	0	0	0	0	0	0	0	0	0	0	0	0	0	0	0	0	0	0	0	0	0	0	0	0
GI15	SAPA_G0521	0309W51997_111212_1.remap_C2808_orf00004	gene 1 protein	Genomic	-	321	-	2059		0	0	0	0	0	0	0	0	0	0	0	0	0	0	1	0	0	0	0	0	0	0	0	0	0	0	0	0	0	0	0	0	0	0	0	0	0	0	0	0
GI15	SAPA_G0522	0309W51997_111212_1.remap_C2808_orf00005	Coat protein D	Genomic	-	114	-	2060		0	0	0	0	0	0	0	0	0	0	0	0	0	0	1	0	0	0	0	0	0	0	0	0	0	0	0	0	0	0	0	0	0	0	0	0	0	0	0	0
GI15	SAPA_G0523	0309W51997_111212_1.remap_C2808_orf00008	Coat protein A	Genomic	-	411	-	2061		0	0	0	0	0	0	0	0	0	0	0	0	0	0	1	0	0	0	0	0	0	0	0	0	0	0	0	0	0	0	0	0	0	0	0	0	0	0	0	0
GI15	SAPA_G0524	0309W51997_111212_1.remap_C2808_orf00009	Coat protein B	Genomic	-	81	-	2062		0	0	0	0	0	0	0	0	0	0	0	0	0	0	1	0	0	0	0	0	0	0	0	0	0	0	0	0	0	0	0	0	0	0	0	0	0	0	0	0
GI15	SAPA_G0525	0309W51997_111212_1.remap_C2808_orf00010	Helix-destabilizing protein	Genomic	-	106	-	2063		0	0	0	0	0	0	0	0	0	0	0	0	0	0	1	0	0	0	0	0	0	0	0	0	0	0	0	0	0	0	0	0	0	0	0	0	0	0	0	0
GI15	SAPA_G0526	0309W51997_111212_1.remap_C2808_orf00012	Phage/plasmid replication protein, gene II/X family	Genomic	-	252	-	2064		0	0	0	0	0	0	0	0	0	0	0	0	0	0	1	0	0	0	0	0	0	0	0	0	0	0	0	0	0	0	0	0	0	0	0	0	0	0	0	0
GI16	SAPA_G0527	STM1332	O-antigen polymerase	Genomic	-	407	rfc	2291		1	1	1	1	1	1	1	1	1	1	1	1	1	1	1	1	1	1	1	1	1	1	1	1	0	1	1	1	1	1	1	1	1	1	1	1	1	1	1	0
GI17	SAPA_G0529	DBS_20091706.scaffold_C2463_orf00002	Predicted tail fiber assembly protein	Phage	-	100	-	2718		0	0	0	0	0	0	0	0	0	0	0	0	0	0	0	0	0	0	0	0	0	0	0	0	0	0	0	0	0	0	0	0	0	1	0	0	0	0	0	0
GI17	SAPA_G0530	DBS_20091706.scaffold_C2463_orf00003	Caudovirales tail fibre assembly protein	Phage	-	154	-	2719		0	0	0	0	0	0	0	0	0	0	0	0	0	0	0	0	0	0	0	0	0	0	0	0	0	0	0	0	0	0	0	0	0	1	0	0	0	0	0	0
GI17	SAPA_G0531	DBS_20091706.scaffold_scaffold50_orf00194	Similar to tail fiber protein	Phage	-	193	-	2720		0	0	0	0	0	0	0	0	0	0	0	0	0	0	0	0	0	0	0	0	0	0	0	0	0	0	0	0	0	0	0	0	0	1	0	0	0	0	0	0
GI17	SAPA_G0532	DBS_20091706.scaffold_scaffold50_orf00193	Similar to phage-related baseplate assembly protein	Phage	-	368	-	2721		0	0	0	0	0	0	0	0	0	0	0	0	0	0	0	0	0	0	0	0	0	0	0	0	0	0	0	0	0	0	0	0	0	1	0	0	0	0	0	0
GI17	SAPA_G0533	DBS_20091706.scaffold_scaffold50_orf00192	Similar to baseplate protein	Phage	-	116	-	2722		0	0	0	0	0	0	0	0	0	0	0	0	0	0	0	0	0	0	0	0	0	0	0	0	0	0	0	0	0	0	0	0	0	1	0	0	0	0	0	0
GI17	SAPA_G0534	DBS_20091706.scaffold_scaffold50_orf00191	Baseplate	Phage	-	171	-	2723		0	0	0	0	0	0	0	0	0	0	0	0	0	0	0	0	0	0	0	0	0	0	0	0	0	0	0	0	0	0	0	0	0	1	0	0	0	0	0	0
GI17	SAPA_G0535	DBS_20091706.scaffold_scaffold50_orf00190	Phage protein	Phage	-	390	-	2724		0	0	0	0	0	0	0	0	0	0	0	0	0	0	0	0	0	0	0	0	0	0	0	0	0	0	0	0	0	0	0	0	0	1	0	0	0	0	0	0
GI17	SAPA_G0536	t1357	putative bacteriophage tail fiber protein	Phage	-	71	-	2725		0	0	0	0	0	0	0	0	0	0	0	0	0	0	0	0	0	0	0	0	0	0	0	0	0	0	0	0	0	0	0	0	0	1	0	0	0	0	0	0
GI17	SAPA_G0537	DBS_20091706.scaffold_scaffold50_orf00186	Uncharacterized conserved protein	Phage	-	295	-	2726		0	0	0	0	0	0	0	0	0	0	0	0	0	0	0	0	0	0	0	0	0	0	0	0	0	0	0	0	0	0	0	0	0	1	0	0	0	0	0	0
GI17	SAPA_G0538	DBS_20091706.scaffold_scaffold50_orf00185	Hypothetical phage protein	Phage	-	822	-	2727		0	0	0	0	0	0	0	0	0	0	0	0	0	0	0	0	0	0	0	0	0	0	0	0	0	0	0	0	0	0	0	0	0	1	0	0	0	0	0	0
GI17	SAPA_G0539	DBS_20091706.scaffold_scaffold50_orf00183	Conserved hypothetical prophage protein	Phage	-	105	-	2728		0	0	0	0	0	0	0	0	0	0	0	0	0	0	0	0	0	0	0	0	0	0	0	0	0	0	0	0	0	0	0	0	0	1	0	0	0	0	0	0
GI17	SAPA_G0540	DBS_20091706.scaffold_scaffold50_orf00182	Phage-related protein	Phage	-	64	-	2729		0	0	0	0	0	0	0	0	0	0	0	0	0	0	0	0	0	0	0	0	0	0	0	0	0	0	0	0	0	0	0	0	0	1	0	0	0	0	0	0
GI17	SAPA_G0541	DBS_20091706.scaffold_scaffold50_orf00181	Similar to tail core protein	Phage	-	174	-	2730		0	0	0	0	0	0	0	0	0	0	0	0	0	0	0	0	0	0	0	0	0	0	0	0	0	0	0	0	0	0	0	0	0	1	0	0	0	0	0	0
GI17	SAPA_G0542	DBS_20091706.scaffold_scaffold50_orf00180	Phage tail sheath protein	Phage	-	476	-	2731		0	0	0	0	0	0	0	0	0	0	0	0	0	0	0	0	0	0	0	0	0	0	0	0	0	0	0	0	0	0	0	0	0	1	0	0	0	0	0	0
GI17	SAPA_G0543	DBS_20091706.scaffold_scaffold50_orf00177	Uncharacterized conserved protein	Phage	-	155	-	2732		0	0	0	0	0	0	0	0	0	0	0	0	0	0	0	0	0	0	0	0	0	0	0	0	0	0	0	0	0	0	0	0	0	1	0	0	0	0	0	0
GI17	SAPA_G0544	DBS_20091706.scaffold_scaffold50_orf00176	Similar to mu-like prophage protein	Phage	-	149	-	2733		0	0	0	0	0	0	0	0	0	0	0	0	0	0	0	0	0	0	0	0	0	0	0	0	0	0	0	0	0	0	0	0	0	1	0	0	0	0	0	0
GI17	SAPA_G0545	DBS_20091706.scaffold_scaffold50_orf00175	Conserved hypothetical prophage protein	Phage	-	119	-	2734		0	0	0	0	0	0	0	0	0	0	0	0	0	0	0	0	0	0	0	0	0	0	0	0	0	0	0	0	0	0	0	0	0	1	0	0	0	0	0	0
GI17	SAPA_G0546	DBS_20091706.scaffold_scaffold50_orf00173	Conserved hypothetical prophage protein	Phage	-	318	-	2735		0	0	0	0	0	0	0	0	0	0	0	0	0	0	0	0	0	0	0	0	0	0	0	0	0	0	0	0	0	0	0	0	0	1	0	0	0	0	0	0
GI17	SAPA_G0547	DBS_20091706.scaffold_scaffold50_orf00172	Uncharacterized conserved protein	Phage	-	352	-	2736		0	0	0	0	0	0	0	0	0	0	0	0	0	0	0	0	0	0	0	0	0	0	0	0	0	0	0	0	0	0	0	0	0	1	0	0	0	0	0	0
GI17	SAPA_G0548	DBS_20091706.scaffold_scaffold50_orf00170	Hypothetical phage protein	Phage	-	153	-	2737		0	0	0	0	0	0	0	0	0	0	0	0	0	0	0	0	0	0	0	0	0	0	0	0	0	0	0	0	0	0	0	0	0	1	0	0	0	0	0	0
GI17	SAPA_G0549	t1371	hypothetical protein	Phage	-	273	-	2738		0	0	0	0	0	0	0	0	0	0	0	0	0	0	0	0	0	0	0	0	0	0	0	0	0	0	0	0	0	0	0	0	0	1	0	0	0	0	0	0
GI17	SAPA_G0550	DBS_20091706.scaffold_scaffold50_orf00167	Similar to protein gp29 of Enterobacteria phage Mu	Phage	-	499	-	2739		0	0	0	0	0	0	0	0	0	0	0	0	0	0	0	0	0	0	0	0	0	0	0	0	0	0	0	0	0	0	0	0	0	1	0	0	0	0	0	0
GI17	SAPA_G0551	DBS_20091706.scaffold_scaffold50_orf00166	Portal family protein	Phage	-	508	-	2740		0	0	0	0	0	0	0	0	0	0	0	0	0	0	0	0	0	0	0	0	0	0	0	0	0	0	0	0	0	0	0	0	0	1	0	0	0	0	0	0
GI17	SAPA_G0552	DBS_20091706.scaffold_scaffold50_orf00164	Similar to gp27 protein of Enterobacteria phage Mu	Phage	-	182	-	2741		0	0	0	0	0	0	0	0	0	0	0	0	0	0	0	0	0	0	0	0	0	0	0	0	0	0	0	0	0	0	0	0	0	1	0	0	0	0	0	0
GI17	SAPA_G0553	DBS_20091706.scaffold_scaffold50_orf00163	Uncharacterized conserved protein	Phage	-	104	-	2742		0	0	0	0	0	0	0	0	0	0	0	0	0	0	0	0	0	0	0	0	0	0	0	0	0	0	0	0	0	0	0	0	0	1	0	0	0	0	0	0
GI17	SAPA_G0554	DBS_20091706.scaffold_scaffold50_orf00162	Similar to putative membrane protein	Phage	-	111	-	2743		0	0	0	0	0	0	0	0	0	0	0	0	0	0	0	0	0	0	0	0	0	0	0	0	0	0	0	0	0	0	0	0	0	1	0	0	0	0	0	0
GI17	SAPA_G0555	DBS_20091706.scaffold_scaffold50_orf00160	Putative lipoprotein	Phage	-	218	-	2744		0	0	0	0	0	0	0	0	0	0	0	0	0	0	0	0	0	0	0	0	0	0	0	0	0	0	0	0	0	0	0	0	0	1	0	0	0	0	0	0
GI17	SAPA_G0556	DBS_20091706.scaffold_scaffold50_orf00159	Transglycosylase SLT domain protein	Phage	-	246	-	2745		0	0	0	0	0	0	0	0	0	0	0	0	0	0	0	0	0	0	0	0	0	0	0	0	0	0	0	0	0	0	0	0	0	1	0	0	0	0	0	0
GI17	SAPA_G0557	DBS_20091706.scaffold_scaffold50_orf00158	Uncharacterized conserved protein	Phage	-	117	-	2746		0	0	0	0	0	0	0	0	0	0	0	0	0	0	0	0	0	0	0	0	0	0	0	0	0	0	0	0	0	0	0	0	0	1	0	0	0	0	0	0
GI17	SAPA_G0558	DBS_20091706.scaffold_scaffold50_orf00156	Similar to probable DNA adenine methylase of a bacteriophage	Phage	-	257	-	2747		0	0	0	0	0	0	0	0	0	0	0	0	0	0	0	0	0	0	0	0	0	0	0	0	0	0	0	0	0	0	0	0	0	1	0	0	0	0	0	0
GI17	SAPA_G0559	DBS_20091706.scaffold_scaffold50_orf00155	Putative prophage lipoprotein	Phage	-	176	-	2748		0	0	0	0	0	0	0	0	0	0	0	0	0	0	0	0	0	0	0	0	0	0	0	0	0	0	0	0	0	0	0	0	0	1	0	0	0	0	0	0
GI17	SAPA_G0560	DBS_20091706.scaffold_scaffold50_orf00154	Putative phage repressor protein	Phage	-	47	-	2749		0	0	0	0	0	0	0	0	0	0	0	0	0	0	0	0	0	0	0	0	0	0	0	0	0	0	0	0	0	0	0	0	0	1	0	0	0	0	0	0
GI17	SAPA_G0561	DBS_20091706.scaffold_scaffold50_orf00153	Hypothetical prophage protein	Phage	-	75	-	2750		0	0	0	0	0	0	0	0	0	0	0	0	0	0	0	0	0	0	0	0	0	0	0	0	0	0	0	0	0	0	0	0	0	1	0	0	0	0	0	0
GI17	SAPA_G0562	DBS_20091706.scaffold_scaffold50_orf00152	Uncharacterized conserved protein	Phage	-	102	-	2751		0	0	0	0	0	0	0	0	0	0	0	0	0	0	0	0	0	0	0	0	0	0	0	0	0	0	0	0	0	0	0	0	0	1	0	0	0	0	0	0
GI17	SAPA_G0563	DBS_20091706.scaffold_scaffold50_orf00151	Gp41 family protein	Phage	-	303	-	2752		0	0	0	0	0	0	0	0	0	0	0	0	0	0	0	0	0	0	0	0	0	0	0	0	0	0	0	0	0	0	0	0	0	1	0	0	0	0	0	0
GI17	SAPA_G0564	DBS_20091706.scaffold_scaffold50_orf00150	Integrase core domain protein (Fragment)	Phage	-	590	-	2753		0	0	0	0	0	0	0	0	0	0	0	0	0	0	0	0	0	0	0	0	0	0	0	0	0	0	0	0	0	0	0	0	0	1	0	0	0	0	0	0
GI17	SAPA_G0565	DBS_20091706.scaffold_scaffold50_orf00148	ExeA protein	Phage	-	389	-	2754		0	0	0	0	0	0	0	0	0	0	0	0	0	0	0	0	0	0	0	0	0	0	0	0	0	0	0	0	0	0	0	0	0	1	0	0	0	0	0	0
GI17	SAPA_G0566	DBS_20091706.scaffold_scaffold50_orf00146	Putative prophage exported protein	Phage	-	90	-	2755		0	0	0	0	0	0	0	0	0	0	0	0	0	0	0	0	0	0	0	0	0	0	0	0	0	0	0	0	0	0	0	0	0	1	0	0	0	0	0	0
GI17	SAPA_G0567	DBS_20091706.scaffold_scaffold50_orf00145	Conserved hypothetical prophage protein	Phage	-	204	-	2756		0	0	0	0	0	0	0	0	0	0	0	0	0	0	0	0	0	0	0	0	0	0	0	0	0	0	0	0	0	0	0	0	0	1	0	0	0	0	0	0
GI17	SAPA_G0568	DBS_20091706.scaffold_scaffold50_orf00141	Conserved hypothetical prophage protein	Phage	-	99	-	2757		0	0	0	0	0	0	0	0	0	0	0	0	0	0	0	0	0	0	0	0	0	0	0	0	0	0	0	0	0	0	0	0	0	1	0	0	0	0	0	0
GI17	SAPA_G0569	DBS_20091706.scaffold_scaffold50_orf00140	Conserved hypothetical prophage protein	Phage	-	230	-	2758		0	0	0	0	0	0	0	0	0	0	0	0	0	0	0	0	0	0	0	0	0	0	0	0	0	0	0	0	0	0	0	0	0	1	0	0	0	0	0	0
GI17	SAPA_G0570	DBS_20091706.scaffold_scaffold50_orf00139	Putative prophage membrane protein	Phage	-	72	-	2759		0	0	0	0	0	0	0	0	0	0	0	0	0	0	0	0	0	0	0	0	0	0	0	0	0	0	0	0	0	0	0	0	0	1	0	0	0	0	0	0
GI17	SAPA_G0571	DBS_20091706.scaffold_scaffold50_orf00138	Phage regluatory protein	Phage	-	142	-	2760		0	0	0	0	0	0	0	0	0	0	0	0	0	0	0	0	0	0	0	0	0	0	0	0	0	0	0	0	0	0	0	0	0	1	0	0	0	0	0	0
GI17	SAPA_G0572	DBS_20091706.scaffold_scaffold50_orf00136	Putative phage transcriptional regulator	Phage	-	130	-	2761		0	0	0	0	0	0	0	0	0	0	0	0	0	0	0	0	0	0	0	0	0	0	0	0	0	0	0	0	0	0	0	0	0	1	0	0	0	0	0	0
GI18	SAPA_G0573	MC_08-0770.scaffold_scaffold21_orf00307	Putative membrane protein	Phage	-	170	-	2833		0	0	0	0	0	0	0	0	0	0	0	0	0	0	0	0	0	0	0	0	0	0	0	0	0	0	0	0	0	0	0	0	0	0	0	0	0	0	0	1
GI18	SAPA_G0574	MC_08-0770.scaffold_scaffold21_orf00313	Phage protein	Phage	-	575	-	2834		0	0	0	0	0	0	0	0	0	0	0	0	0	0	0	0	0	0	0	0	0	0	0	0	0	0	0	0	0	0	0	0	0	0	0	0	0	0	0	1
GI18	SAPA_G0575	MC_08-0770.scaffold_scaffold21_orf00314	Phage protein	Phage	-	181	-	2835		0	0	0	0	0	0	0	0	0	0	0	0	0	0	0	0	0	0	0	0	0	0	0	0	0	0	0	0	0	0	0	0	0	0	0	0	0	0	0	1
GI18	SAPA_G0576	MC_08-0770.scaffold_scaffold21_orf00316	Putative phage protein	Phage	-	243	-	2836		0	0	0	0	0	0	0	0	0	0	0	0	0	0	0	0	0	0	0	0	0	0	0	0	0	0	0	0	0	0	0	0	0	0	0	0	0	0	0	1
GI18	SAPA_G0577	MC_08-0770.scaffold_scaffold21_orf00317	Putative phage tail fiber assembly protein	Phage	-	139	-	2837		0	0	0	0	0	0	0	0	0	0	0	0	0	0	0	0	0	0	0	0	0	0	0	0	0	0	0	0	0	0	0	0	0	0	0	0	0	0	0	1
GI18	SAPA_G0578	MC_08-0770.scaffold_scaffold21_orf00318	Phage tail fiber repeat	Phage	-	721	-	2838		0	0	0	0	0	0	0	0	0	0	0	0	0	0	0	0	0	0	0	0	0	0	0	0	0	0	0	0	0	0	0	0	0	0	0	0	0	0	0	1
GI18	SAPA_G0579	MC_08-0770.scaffold_scaffold21_orf00319	Putative phage gene	Phage	-	198	-	2839		0	0	0	0	0	0	0	0	0	0	0	0	0	0	0	0	0	0	0	0	0	0	0	0	0	0	0	0	0	0	0	0	0	0	0	0	0	0	0	1
GI18	SAPA_G0580	MC_08-0770.scaffold_scaffold21_orf00320	Phage protein	Phage	-	395	-	2840		0	0	0	0	0	0	0	0	0	0	0	0	0	0	0	0	0	0	0	0	0	0	0	0	0	0	0	0	0	0	0	0	0	0	0	0	0	0	0	1
GI18	SAPA_G0581	MC_08-0770.scaffold_scaffold21_orf00321	Phage protein	Phage	-	112	-	2841		0	0	0	0	0	0	0	0	0	0	0	0	0	0	0	0	0	0	0	0	0	0	0	0	0	0	0	0	0	0	0	0	0	0	0	0	0	0	0	1
GI18	SAPA_G0582	MC_08-0770.scaffold_scaffold21_orf00322	Phage tail tape measure protein, TP901 family	Phage	-	705	-	2842		0	0	0	0	0	0	0	0	0	0	0	0	0	0	0	0	0	0	0	0	0	0	0	0	0	0	0	0	0	0	0	0	0	0	0	0	0	0	0	1
GI18	SAPA_G0583	MC_08-0770.scaffold_scaffold21_orf00325	Phage protein	Phage	-	90	-	2843		0	0	0	0	0	0	0	0	0	0	0	0	0	0	0	0	0	0	0	0	0	0	0	0	0	0	0	0	0	0	0	0	0	0	0	0	0	0	0	1
GI18	SAPA_G0584	MC_08-0770.scaffold_scaffold21_orf00329	Hypothetical phage-related protein	Phage	-	113	-	2844		0	0	0	0	0	0	0	0	0	0	0	0	0	0	0	0	0	0	0	0	0	0	0	0	0	0	0	0	0	0	0	0	0	0	0	0	0	0	0	1
GI18	SAPA_G0585	MC_08-0770.scaffold_scaffold21_orf00330	Holin	Phage	-	104	-	2845		0	0	0	0	0	0	0	0	0	0	0	0	0	0	0	0	0	0	0	0	0	0	0	0	0	0	0	0	0	0	0	0	0	0	0	0	0	0	0	1
GI18	SAPA_G0586	MC_08-0770.scaffold_scaffold21_orf00331	Phage protein	Phage	-	152	-	2846		0	0	0	0	0	0	0	0	0	0	0	0	0	0	0	0	0	0	0	0	0	0	0	0	0	0	0	0	0	0	0	0	0	0	0	0	0	0	0	1
GI18	SAPA_G0587	MC_08-0770.scaffold_scaffold21_orf00332	Tail sheath	Phage	-	381	-	2847		0	0	0	0	0	0	0	0	0	0	0	0	0	0	0	0	0	0	0	0	0	0	0	0	0	0	0	0	0	0	0	0	0	0	0	0	0	0	0	1
GI18	SAPA_G0588	MC_08-0770.scaffold_scaffold21_orf00333	Phage protein	Phage	-	232	-	2848		0	0	0	0	0	0	0	0	0	0	0	0	0	0	0	0	0	0	0	0	0	0	0	0	0	0	0	0	0	0	0	0	0	0	0	0	0	0	0	1
GI18	SAPA_G0589	MC_08-0770.scaffold_scaffold21_orf00334	Putative uncharacterized protein	Phage	-	159	-	2849		0	0	0	0	0	0	0	0	0	0	0	0	0	0	0	0	0	0	0	0	0	0	0	0	0	0	0	0	0	0	0	0	0	0	0	0	0	0	0	1
GI18	SAPA_G0590	MC_08-0770.scaffold_scaffold21_orf00335	Phage head completion protein	Phage	-	158	-	2850		0	0	0	0	0	0	0	0	0	0	0	0	0	0	0	0	0	0	0	0	0	0	0	0	0	0	0	0	0	0	0	0	0	0	0	0	0	0	0	1
GI18	SAPA_G0591	MC_08-0770.scaffold_scaffold21_orf00336	Phage terminase subunit	Phage	-	234	-	2851		0	0	0	0	0	0	0	0	0	0	0	0	0	0	0	0	0	0	0	0	0	0	0	0	0	0	0	0	0	0	0	0	0	0	0	0	0	0	0	1
GI18	SAPA_G0592	MC_08-0770.scaffold_scaffold21_orf00338	Phage major capsid protein, P2 family	Phage	-	341	-	2852		0	0	0	0	0	0	0	0	0	0	0	0	0	0	0	0	0	0	0	0	0	0	0	0	0	0	0	0	0	0	0	0	0	0	0	0	0	0	0	1
GI18	SAPA_G0593	MC_08-0770.scaffold_scaffold21_orf00339	Phage capsid scaffolding	Phage	-	335	-	2853		0	0	0	0	0	0	0	0	0	0	0	0	0	0	0	0	0	0	0	0	0	0	0	0	0	0	0	0	0	0	0	0	0	0	0	0	0	0	0	1
GI18	SAPA_G0594	MC_08-0770.scaffold_scaffold21_orf00342	Possible [Haemophilus phage HP1] orf16-like phage protein	Phage	-	604	-	2854		0	0	0	0	0	0	0	0	0	0	0	0	0	0	0	0	0	0	0	0	0	0	0	0	0	0	0	0	0	0	0	0	0	0	0	0	0	0	0	1
GI18	SAPA_G0595	MC_08-0770.scaffold_scaffold21_orf00345	Phage portal protein, pbsx family	Phage	-	354	-	2855		0	0	0	0	0	0	0	0	0	0	0	0	0	0	0	0	0	0	0	0	0	0	0	0	0	0	0	0	0	0	0	0	0	0	0	0	0	0	0	1
GI18	SAPA_G0596	MC_08-0770.scaffold_scaffold21_orf00346	Phage transcriptional activator, Ogr/delta	Phage	-	92	-	2856		0	0	0	0	0	0	0	0	0	0	0	0	0	0	0	0	0	0	0	0	0	0	0	0	0	0	0	0	0	0	0	0	0	0	0	0	0	0	0	1
GI18	SAPA_G0597	MC_08-0770.scaffold_scaffold21_orf00347	Putative dna-methyltransferase protein	Phage	-	231	-	2857		0	0	0	0	0	0	0	0	0	0	0	0	0	0	0	0	0	0	0	0	0	0	0	0	0	0	0	0	0	0	0	0	0	0	0	0	0	0	0	1
GI18	SAPA_G0598	MC_08-0770.scaffold_scaffold21_orf00350	Replication gene A protein	Phage	-	877	-	2858		0	0	0	0	0	0	0	0	0	0	0	0	0	0	0	0	0	0	0	0	0	0	0	0	0	0	0	0	0	0	0	0	0	0	0	0	0	0	0	1
GI18	SAPA_G0599	MC_08-0770.scaffold_scaffold21_orf00352	Predicted prophage protein	Phage	-	77	-	2859		0	0	0	0	0	0	0	0	0	0	0	0	0	0	0	0	0	0	0	0	0	0	0	0	0	0	0	0	0	0	0	0	0	0	0	0	0	0	0	1
GI18	SAPA_G0600	MC_08-0770.scaffold_scaffold21_orf00355	Retron EC67 DNA adenine methylase	Phage	-	328	dam	2860		0	0	0	0	0	0	0	0	0	0	0	0	0	0	0	0	0	0	0	0	0	0	0	0	0	0	0	0	0	0	0	0	0	0	0	0	0	0	0	1
GI18	SAPA_G0601	MC_08-0770.scaffold_scaffold21_orf00356	Putative uncharacterized protein	Phage	-	128	-	2861		0	0	0	0	0	0	0	0	0	0	0	0	0	0	0	0	0	0	0	0	0	0	0	0	0	0	0	0	0	0	0	0	0	0	0	0	0	0	0	1
GI18	SAPA_G0602	MC_08-0770.scaffold_scaffold21_orf00358	Hypothetical phage-related protein	Phage	-	74	-	2862		0	0	0	0	0	0	0	0	0	0	0	0	0	0	0	0	0	0	0	0	0	0	0	0	0	0	0	0	0	0	0	0	0	0	0	0	0	0	0	1
GI18	SAPA_G0603	MC_08-0770.scaffold_scaffold21_orf00361	Predicted repressor protein	Phage	-	101	-	2863		0	0	0	0	0	0	0	0	0	0	0	0	0	0	0	0	0	0	0	0	0	0	0	0	0	0	0	0	0	0	0	0	0	0	0	0	0	0	0	1
GI18	SAPA_G0604	MC_08-0770.scaffold_scaffold21_orf00362	Integrase family protein	Phage	-	329	-	2864		0	0	0	0	0	0	0	0	0	0	0	0	0	0	0	0	0	0	0	0	0	0	0	0	0	0	0	0	0	0	0	0	0	0	0	0	0	0	0	1
GI19	SAPA_G0605	WR-05-02138_111212_5.remap_scaffold37_orf00039	Integrase family protein	Phage	-	410	-	3038		0	0	0	0	0	0	0	0	0	0	0	0	0	0	0	0	0	0	0	0	0	0	0	0	0	0	0	0	0	0	0	1	1	0	0	0	0	0	0	0
GI19	SAPA_G0606	WR-05-02138_111212_5.remap_scaffold37_orf00038	Putative uncharacterized protein	Phage	-	574	-	3039		0	0	0	0	0	0	0	0	0	0	0	0	0	0	0	0	0	0	0	0	0	0	0	0	0	0	0	0	0	0	0	1	1	0	0	0	0	0	0	0
GI19	SAPA_G0607	WR-00-06755_111212_4.remap_scaffold48_orf00119	Putative uncharacterized protein	Phage	-	477	-	3040		0	0	0	0	0	0	0	0	0	0	0	0	0	0	0	0	0	0	0	0	0	0	0	0	0	0	0	0	0	0	0	1	1	0	0	0	0	0	0	0
GI19	SAPA_G0608	WR-05-02138_111212_5.remap_scaffold37_orf00034	Zinc-binding domain of primase-helicase family	Phage	-	896	-	3041		0	0	0	0	0	0	0	0	0	0	0	0	0	0	0	0	0	0	0	0	0	0	1	0	0	0	0	0	0	0	0	1	1	0	0	0	0	0	0	0
GI19	SAPA_G0609	WR-01-11238_111212_5.remap_scaffold52_orf00065	Putative uncharacterized protein	Phage	-	137	-	3042		0	0	0	0	0	0	0	0	0	0	0	0	0	0	0	0	0	0	0	0	0	0	1	0	0	0	0	0	0	0	0	1	1	0	0	0	0	0	0	0
GI19	SAPA_G0610	WR-01-11238_111212_5.remap_scaffold52_orf00063	Phage immunity repressor protein	Phage	-	68	-	3043		0	0	0	0	0	0	0	0	0	0	0	0	0	0	0	0	0	0	0	0	0	0	1	0	0	0	0	0	0	0	0	1	1	0	0	0	0	0	0	0
GI19	SAPA_G0611	WR-00-06755_111212_4.remap_scaffold48_orf00124	Major capsid protein	Phage	-	335	-	3044		0	0	0	0	0	0	0	0	0	0	0	0	0	0	0	0	0	0	0	0	0	0	1	0	0	0	0	0	0	0	0	1	1	0	0	0	0	0	0	0
GI19	SAPA_G0612	WR-05-02138_111212_5.remap_scaffold37_orf00030	Putative uncharacterized protein	Phage	-	287	-	3045		0	0	0	0	0	0	0	0	0	0	0	0	0	0	0	0	0	0	0	0	0	0	1	0	0	0	0	0	0	0	0	1	1	0	0	0	0	0	0	0
GI20	SAPA_G0613	SeAg_B2777	hypothetical protein	Phage	-	57	-	3272		0	0	0	0	0	0	0	0	0	0	0	0	0	0	1	1	1	0	0	1	1	1	1	1	1	1	1	1	1	1	1	1	1	0	1	1	1	1	1	1
GI20	SAPA_G0614	SeAg_B2778	hypothetical protein	Phage	-	490	-	3273		0	0	0	0	0	0	0	0	0	0	0	0	0	0	1	1	1	0	0	1	1	1	1	1	1	1	1	1	1	1	1	1	1	0	1	1	1	1	1	1
GI20	SAPA_G0615	SeAg_B2779	phage protein	Phage	-	567	-	3274		0	0	0	0	0	0	0	0	0	0	0	0	0	0	1	1	1	0	0	1	1	1	1	1	1	1	1	1	1	1	1	1	1	0	1	1	1	1	1	1
GI20	SAPA_G0616	SeAg_B2780	phage protein	Phage	-	181	-	3275		0	0	0	0	0	0	0	0	0	0	0	0	0	0	1	1	1	0	0	1	1	1	1	1	1	1	1	1	1	1	1	1	1	0	1	1	1	1	1	1
GI20	SAPA_G0617	SeAg_B2781	hypothetical protein	Phage	-	241	-	3276		0	0	0	0	0	0	0	0	0	0	0	0	0	0	1	1	1	0	0	1	1	1	1	1	1	1	1	1	1	1	1	1	1	0	1	1	1	1	1	1
GI20	SAPA_G0618	SeAg_B2782	putative phage tail fiber assembly protein	Phage	-	176	-	3277		0	0	0	0	0	0	0	0	0	0	0	0	0	0	1	1	1	0	0	1	1	1	1	1	1	1	1	1	1	1	1	1	1	0	1	1	1	1	1	1
GI20	SAPA_G0619	SeAg_B2783	phage tail fiber repeat-containing protein	Phage	-	670	-	3278		0	0	0	0	0	0	0	0	0	0	0	0	0	0	1	1	1	0	0	1	1	1	1	1	1	1	1	1	1	1	1	1	1	0	1	1	1	1	1	1
GI20	SAPA_G0620	SeAg_B2850	tail fiber domain protein	Phage	-	588	-	3279		0	0	0	0	0	0	0	0	0	0	0	0	0	0	1	1	1	0	0	1	1	1	1	1	1	1	1	1	1	1	1	1	1	0	1	1	1	1	1	1
GI20	SAPA_G0621	SeAg_B2784	phage protein	Phage	-	195	-	3280		0	0	0	0	0	0	0	0	0	0	0	0	0	0	1	1	1	0	0	1	1	1	1	1	1	1	1	1	1	1	1	1	1	0	1	1	1	1	1	1
GI20	SAPA_G0622	SeAg_B2785	phage protein	Phage	-	394	-	3281		0	0	0	0	0	0	0	0	0	0	0	0	0	0	1	1	1	0	0	1	1	1	1	1	1	1	1	1	1	1	1	1	1	0	1	1	1	1	1	1
GI20	SAPA_G0623	SeAg_B2786	phage protein	Phage	-	109	-	3282		0	0	0	0	0	0	0	0	0	0	0	0	0	0	1	1	1	0	0	1	1	1	1	1	1	1	1	1	1	1	1	1	1	0	1	1	1	1	1	1
GI20	SAPA_G0624	SeAg_B2787	phage tail tape measure protein, TP901 family, core region	Phage	-	655	-	3283		0	0	0	0	0	0	0	0	0	0	0	0	0	0	1	1	1	0	0	1	1	1	1	1	1	1	1	1	1	1	1	1	1	0	1	1	1	1	1	1
GI20	SAPA_G0625	SeAg_B2788	phage protein	Phage	-	85	-	3284		0	0	0	0	0	0	0	0	0	0	0	0	0	0	1	1	1	0	0	1	1	1	1	1	1	1	1	1	1	1	1	1	1	0	1	1	1	1	1	1
GI20	SAPA_G0626	SeAg_B2789	hypothetical phage-related protein	Phage	-	110	-	3285		0	0	0	0	0	0	0	0	0	0	0	0	0	0	1	1	1	0	0	1	1	1	1	1	1	1	1	1	1	1	1	1	1	0	1	1	1	1	1	1
GI20	SAPA_G0627	SeAg_B2790	hypothetical phage-related protein	Phage	-	113	-	3286		0	0	0	0	0	0	0	0	0	0	0	0	0	0	1	1	1	0	0	1	1	1	1	1	1	1	1	1	1	1	1	1	1	0	1	1	1	1	1	1
GI20	SAPA_G0628	SeAg_B2791	phage holin family 2	Phage	-	98	-	3287		0	0	0	0	0	0	0	0	0	0	0	0	0	0	1	1	1	0	0	1	1	1	1	1	1	1	1	1	1	1	1	1	1	0	1	1	1	1	1	1
GI20	SAPA_G0629	SeAg_B2792	phage protein	Phage	-	151	-	3288		0	0	0	0	0	0	0	0	0	0	0	0	0	0	1	1	1	0	0	1	1	1	1	1	1	1	1	1	1	1	1	1	1	0	1	1	1	1	1	1
GI20	SAPA_G0630	SeAg_B2793	tail sheath	Phage	-	375	-	3289		0	0	0	0	0	0	0	0	0	0	0	0	0	0	1	1	1	0	0	1	1	1	1	1	1	1	1	1	1	1	1	1	1	0	1	1	1	1	1	1
GI20	SAPA_G0631	SeAg_B2794	phage protein	Phage	-	234	-	3290		0	0	0	0	0	0	0	0	0	0	0	0	0	0	1	1	1	0	0	1	1	1	1	1	1	1	1	1	1	1	1	1	1	0	1	1	1	1	1	1
GI20	SAPA_G0632	SeAg_B2795	hypothetical protein	Phage	-	160	-	3291		0	0	0	0	0	0	0	0	0	0	0	0	0	0	1	1	1	0	0	1	1	1	1	1	1	1	1	1	1	1	1	1	1	0	1	1	1	1	1	1
GI20	SAPA_G0633	SeAg_B2796	phage head completion protein	Phage	-	150	-	3292		0	0	0	0	0	0	0	0	0	0	0	0	0	0	1	1	1	0	0	1	1	1	1	1	1	1	1	1	1	1	1	1	1	0	1	1	1	1	1	1
GI20	SAPA_G0634	SeAg_B2797	phage terminase subunit	Phage	-	232	-	3293		0	0	0	0	0	0	0	0	0	0	0	0	0	0	1	1	1	0	0	1	1	1	1	1	1	1	1	1	1	1	1	1	1	0	1	1	1	1	1	1
GI20	SAPA_G0635	SeAg_B2798	phage major capsid protein, P2 family	Phage	-	342	-	3294		0	0	0	0	0	0	0	0	0	0	0	0	0	0	1	1	1	0	0	1	1	1	1	1	1	1	1	1	1	1	1	1	1	0	1	1	1	1	1	1
GI20	SAPA_G0636	SeAg_B2799	scaffold protein	Phage	-	329	-	3295		0	0	0	0	0	0	0	0	0	0	0	0	0	0	1	1	1	0	0	1	1	1	1	1	1	1	1	1	1	1	1	1	1	0	1	1	1	1	1	1
GI20	SAPA_G0637	SeAg_B2800	putative conserved hypothetical protein	Phage	-	594	-	3296		0	0	0	0	0	0	0	0	0	0	0	0	0	0	1	1	1	0	0	1	1	1	1	1	1	1	1	1	1	1	1	1	1	0	1	1	1	1	1	1
GI20	SAPA_G0638	SeAg_B2801	phage portal protein, pbsx family	Phage	-	339	-	3297		0	0	0	0	0	0	0	0	0	0	0	0	0	0	1	1	1	0	0	1	1	1	1	1	1	1	1	1	1	1	1	1	1	0	1	1	1	1	1	1
GI20	SAPA_G0639	SeAg_B2802	zinc-finger protein	Phage	-	89	-	3298		0	0	0	0	0	0	0	0	0	0	0	0	0	0	1	1	1	0	0	1	1	1	1	1	1	1	1	1	1	1	1	1	1	0	1	1	1	1	1	1
GI20	SAPA_G0640	SeAg_B2803	putative phage-related protein	Phage	-	885	-	3299		0	0	0	0	0	0	0	0	0	0	0	0	0	0	1	1	1	0	0	1	1	1	1	1	1	1	1	1	1	1	1	1	1	0	1	1	1	1	1	1
GI20	SAPA_G0641	SeAg_B2805	conserved hypothetical protein	Phage	-	72	-	3300		0	0	0	0	0	0	0	0	0	0	0	0	0	0	1	1	1	0	0	1	1	1	1	1	1	1	1	1	1	1	1	1	1	0	1	1	1	1	1	1
GI20	SAPA_G0642	SeAg_B2806	endodeoxyribonuclease	Phage	-	189	-	3301		0	0	0	0	0	0	0	0	0	0	0	0	0	0	1	1	1	0	0	1	1	1	1	1	1	1	1	1	1	1	1	1	1	0	1	1	1	1	1	1
GI20	SAPA_G0643	SeAg_B2807	hypothetical protein	Phage	-	110	-	3302		0	0	0	0	0	0	0	0	0	0	0	0	0	0	1	1	1	0	0	1	1	1	1	1	1	1	1	1	1	1	1	1	1	0	1	1	1	1	1	1
GI20	SAPA_G0644	SeAg_B2808	bacteriophage regulatory protein	Phage	-	112	-	3303		0	0	0	0	0	0	0	0	0	0	0	0	0	0	1	1	1	0	0	1	1	1	1	1	1	1	1	1	1	1	1	1	1	0	1	1	1	1	1	1
GI20	SAPA_G0645	SeAg_B2809	hypothetical protein	Phage	-	39	-	3304		0	0	0	0	0	0	0	0	0	0	0	0	0	0	1	1	1	0	0	1	1	1	1	1	1	1	1	1	1	1	1	1	1	0	1	1	1	1	1	1
GI20	SAPA_G0646	SeAg_B2810	integrase	Phage	-	336	-	3305		0	0	0	0	0	0	0	0	0	0	0	0	0	0	1	1	1	0	0	1	1	1	1	1	1	1	1	1	1	1	1	1	1	0	1	1	1	1	1	1
GI21	SAPA_G0647	t4294	putative positive regulator of late gene transcription	Phage	-	72	-	3334		0	0	0	0	0	0	0	0	0	0	0	0	0	0	0	1	1	1	1	0	0	0	0	0	0	0	0	0	0	0	0	0	0	0	0	0	0	0	0	0
GI21	SAPA_G0648	MC_08-0742.scaffold_C2547_orf00003	Bacteriophage tail protein GpU	Phage	-	162	-	3335		0	0	0	0	0	0	0	0	0	0	0	0	0	0	0	1	1	1	1	0	0	0	0	0	0	0	0	0	0	0	0	0	0	0	0	1	1	1	0	0
GI21	SAPA_G0649	DBS_20005023.scaffold_C2389_orf00009	Phage tail tape measure protein, TP901 family, core region	Phage	-	1026	-	3336		0	0	0	0	0	0	0	0	0	0	0	0	0	0	0	1	1	1	1	0	0	0	0	0	0	0	0	0	0	0	0	0	0	0	0	1	1	1	0	0
GI21	SAPA_G0650	SeAg_B2841	hypothetical protein	Phage	-	47	-	3337		1	1	1	1	1	1	1	1	1	1	1	1	1	1	0	0	0	0	0	0	1	1	1	1	1	1	1	1	1	1	0	0	0	0	0	0	0	0	0	1
GI21	SAPA_G0651	SeAg_B2842	phage late control D family protein	Phage	-	366	-	3338		1	1	1	1	1	1	1	1	1	1	1	1	1	1	0	0	0	0	0	0	1	1	1	1	1	1	1	1	1	1	0	0	0	0	0	0	0	0	0	1
GI21	SAPA_G0652	SeAg_B2843	phage P2 GpU family protein	Phage	-	161	-	3339		1	1	1	1	1	1	1	1	1	1	1	1	1	1	0	0	0	0	0	0	1	1	1	1	1	1	1	1	1	1	0	0	0	0	0	0	0	0	0	1
GI21	SAPA_G0653	SeAg_B2844	phage tail tape measure protein	Phage	-	935	-	3340		1	1	1	1	1	1	1	1	1	1	1	1	1	1	0	0	0	0	0	0	1	1	1	1	1	1	1	1	1	1	0	0	0	0	0	0	0	0	0	1
GI21	SAPA_G0654	SeAg_B2845	phage tail protein, P2 GpE family	Phage	-	40	-	3341		1	1	1	1	1	1	1	1	1	1	1	1	1	1	0	1	1	1	1	0	1	1	1	1	1	1	1	1	1	1	0	0	0	0	0	1	1	1	0	1
GI21	SAPA_G0655	SeAg_B2846	phage tail protein E	Phage	-	100	-	3342		1	1	1	1	1	1	1	1	1	1	1	1	1	1	0	1	1	1	1	0	1	1	1	1	1	1	1	1	1	1	0	0	0	0	0	1	1	1	0	1
GI21	SAPA_G0656	SeAg_B2847	phage major tail tube protein FII	Phage	-	171	-	3343		1	1	1	1	1	1	1	1	1	1	1	1	1	1	0	1	1	1	1	0	1	1	1	1	1	1	1	1	1	1	0	0	0	0	0	1	1	1	0	1
GI21	SAPA_G0657	SeAg_B2848	major tail sheath protein	Phage	-	390	-	3344		1	1	1	1	1	1	1	1	1	1	1	1	1	1	0	1	1	1	1	0	1	1	1	1	1	1	1	1	1	1	0	0	0	0	0	1	1	1	0	1
GI21	SAPA_G0658	SeAg_B2849	putative phage tail fiber assembly protein	Phage	-	175	-	3345		1	1	1	1	1	1	1	1	1	1	1	1	1	1	0	0	0	0	0	0	0	0	0	0	0	0	0	0	0	0	0	0	0	0	0	0	0	0	0	1
GI21	SAPA_G0661	SeAg_B2782	putative phage tail fiber assembly protein	Phage	-	176	-	3348		0	0	0	0	0	0	0	0	0	0	0	0	0	0	0	0	0	0	0	0	0	0	0	0	0	0	0	0	0	0	0	0	0	0	0	0	0	0	0	0
GI21	SAPA_G0662	t1351	bacteriophage tail fiber protein	Phage	-	341	-	3349		0	0	0	0	0	0	0	0	0	0	0	0	0	0	0	0	1	1	1	0	0	0	0	0	0	0	0	0	0	0	0	0	0	0	0	1	0	0	0	0
GI21	SAPA_G0663	DBS_20005023.scaffold_C2223_orf00001	Caudovirales tail fibre assembly protein	Phage	-	201	tfaE	3350		0	0	0	0	0	0	0	0	0	0	0	0	0	0	0	0	1	1	1	0	0	0	0	0	0	0	0	0	0	0	0	0	0	0	0	1	0	0	0	0
GI21	SAPA_G0664	WR-10-02783_111212_5.remap_C2430_orf00001	Tail fiber assembly protein homolog	Phage	-	198	-	3351		0	0	0	0	0	0	0	0	0	0	0	0	0	0	0	1	0	0	0	0	0	0	0	0	0	0	0	0	0	0	0	0	0	0	0	0	0	0	0	0
GI21	SAPA_G0665	MC_08-0742.scaffold_C2389_orf00001	Phage tail assembly chaperone gp38	Phage	-	147	-	3352		0	0	0	0	0	0	0	0	0	0	0	0	0	0	0	1	1	1	1	0	0	0	0	0	0	0	0	0	0	0	0	0	0	0	0	1	1	1	0	0
GI21	SAPA_G0666	MC_05-0811.scaffold_scaffold12_orf00003	Tail protein	Phage	-	116	-	3353		1	1	1	1	1	1	1	1	1	1	1	1	1	1	0	0	0	0	0	0	0	0	0	0	0	0	0	0	0	0	0	0	0	0	0	0	0	0	0	1
GI21	SAPA_G0667	STM2705	Fels-2 prophage protein	Phage	-	205	-	3354		1	1	1	1	1	1	1	1	1	1	1	1	1	1	0	0	0	0	0	0	0	0	0	0	0	0	0	0	0	0	0	0	0	0	0	0	0	0	0	1
GI21	SAPA_G0668	t4304	putative phage tail fiber protein	Phage	-	135	-	3355		1	1	1	1	1	1	1	1	1	1	1	1	1	1	0	0	0	0	0	0	0	0	0	0	0	0	0	0	0	0	0	0	0	0	0	0	0	0	0	1
GI21	SAPA_G0669	DBS_20080935_111212_2.remap_C2466_orf00002	Fels-2 prophage protein	Phage	-	243	pin	3356		1	1	1	1	1	1	1	1	1	1	1	1	1	1	0	0	0	0	0	0	0	0	0	0	0	0	0	0	0	0	0	0	0	0	0	0	0	0	0	1
GI21	SAPA_G0670	DBS_20080506_111212_2.remap_C2313_orf00003	Phage Tail Collar Domain protein	Phage	-	122	-	3357		0	0	0	0	0	0	0	0	0	0	0	0	0	0	0	1	0	0	0	0	0	0	0	0	0	0	0	0	0	0	0	0	0	0	0	0	0	0	0	0
GI21	SAPA_G0671	WR-02-00958_111212_5.remap_scaffold6_orf00118	Phage-related tail fibre protein-like protein	Phage	-	469	-	3358		0	0	0	0	0	0	0	0	0	0	0	0	0	0	0	1	1	1	1	0	1	0	0	0	0	0	0	0	0	0	0	0	0	0	0	1	1	1	0	0
GI21	SAPA_G0672	SeAg_B2851	phage tail protein I	Phage	-	201	-	3359		1	1	1	1	1	1	1	1	1	1	1	1	1	1	0	1	1	1	1	0	1	1	1	1	1	1	1	1	1	1	0	0	0	0	0	1	1	1	0	1
GI21	SAPA_G0673	SeAg_B2852	baseplate assembly protein J	Phage	-	302	-	3360		1	1	1	1	1	1	1	1	1	1	1	1	1	1	0	1	1	1	1	0	1	1	1	1	1	1	1	1	1	1	0	0	0	0	0	1	1	1	0	1
GI21	SAPA_G0674	SeAg_B2853	baseplate assembly protein W	Phage	-	119	-	3361		1	1	1	1	1	1	1	1	1	1	1	1	1	1	0	1	1	1	1	0	1	1	1	1	1	1	1	1	1	1	0	0	0	0	0	1	1	1	0	1
GI21	SAPA_G0675	SeAg_B2854	phage baseplate assembly protein V	Phage	-	192	-	3362		1	1	1	1	1	1	1	1	1	1	1	1	1	1	0	1	1	1	1	0	1	1	1	1	1	1	1	1	1	1	0	0	0	0	0	1	1	1	0	1
GI21	SAPA_G0676	MC_05-0209.scaffold_C2650_orf00036	Putative uncharacterized protein	Phage	-	287	-	3363		0	0	0	0	0	0	0	0	0	0	0	0	0	0	0	0	0	0	0	0	0	0	0	0	0	0	0	0	0	0	0	0	0	0	0	0	0	0	0	0
GI21	SAPA_G0677	DBS_20080506_111212_2.remap_scaffold2_orf00005	hypothetical protein	Phage	-	272	-	3364		0	0	0	0	0	0	0	0	0	0	0	0	0	0	0	1	0	0	0	0	0	0	0	0	0	0	0	0	0	0	0	0	0	0	0	0	0	0	0	0
GI21	SAPA_G0678	DBS_20005023.scaffold_scaffold1_orf00109	LF_82	Phage	-	121	-	3365		0	0	0	0	0	0	0	0	0	0	0	0	0	0	0	0	0	0	0	0	0	0	0	0	0	0	0	0	0	0	0	0	0	0	0	1	1	1	0	0
GI21	SAPA_G0679	SeAg_B2855	hypothetical protein	Phage	-	481	-	3366		0	0	0	0	0	0	0	0	0	0	0	0	0	0	0	0	0	0	0	0	0	1	1	1	1	1	1	1	1	1	0	0	0	0	0	0	0	0	0	0
GI21	SAPA_G0680	SeAg_B2856	phage virion morphogenesis protein	Phage	-	149	-	3367		1	1	1	1	1	1	1	1	1	1	1	1	1	1	0	1	1	1	1	0	1	1	1	1	1	1	1	1	1	1	0	0	0	0	0	1	1	1	0	1
GI21	SAPA_G0681	SeAg_B2857	P2 phage tail completion protein R	Phage	-	143	-	3368		1	1	1	1	1	1	1	1	1	1	1	1	1	1	0	1	1	1	1	0	1	1	1	1	1	1	1	1	1	1	0	0	0	0	0	1	1	1	0	1
GI21	SAPA_G0682	SeAg_B2858	conserved phage protein	Phage	-	57	-	3369		1	1	1	1	1	1	1	1	1	1	1	1	1	1	0	1	1	1	1	0	1	1	1	1	1	1	1	1	1	1	0	0	0	0	0	1	1	1	0	1
GI21	SAPA_G0683	SeAg_B2859	putative regulatory protein	Phage	-	141	-	3370		1	1	1	1	1	1	1	1	1	1	1	1	1	1	0	1	1	1	1	0	1	1	1	1	1	1	1	1	1	1	0	0	0	0	0	1	1	1	0	1
GI21	SAPA_G0684	MC_08-0742.scaffold_C2673_orf00011	Predicted membrane protein	Phage	-	126	-	3371		0	0	0	0	0	0	0	0	0	0	0	0	0	0	0	1	1	1	1	0	0	0	0	0	0	0	0	0	0	0	0	0	0	0	0	0	0	0	0	0
GI21	SAPA_G0685	MC_05-0784.scaffold_scaffold1_orf00106	Predicted bacteriophage protein	Phage	-	125	-	3372		1	1	1	1	1	1	1	1	1	1	1	1	1	1	0	0	0	0	0	0	0	0	0	0	0	0	0	0	0	0	0	0	0	0	0	0	0	0	0	1
GI21	SAPA_G0686	SeAg_B2860	conserved hypothetical protein	Phage	-	125	-	3373		0	0	0	0	0	0	0	0	0	0	0	0	0	0	0	0	0	0	0	0	1	1	1	1	1	1	1	1	1	1	0	0	0	0	0	0	0	0	0	0
GI21	SAPA_G0687	SeAg_B2861	phage lysozyme	Phage	-	169	-	3374		1	1	1	1	1	1	1	1	1	1	1	1	1	1	0	1	1	1	1	0	1	1	1	1	1	1	1	1	1	1	0	0	0	0	0	1	1	1	0	1
GI21	SAPA_G0688	SeAg_B2862	holin family protein	Phage	-	71	-	3375		1	1	1	1	1	1	1	1	1	1	1	1	1	1	0	1	1	1	1	0	1	1	1	1	1	1	1	1	1	1	0	0	0	0	0	1	1	1	0	1
GI21	SAPA_G0689	SeAg_B2863	phage Tail Protein X	Phage	-	67	-	3376		1	1	1	1	1	1	1	1	1	1	1	1	1	1	0	1	1	1	1	0	1	1	1	1	1	1	1	1	1	1	0	0	0	0	0	1	1	1	0	1
GI21	SAPA_G0690	WR-10-02783_111212_5.remap_scaffold7_orf00017	Head completion/stabilization protein (GpL)	Phage	-	156	-	3377		0	0	0	0	0	0	0	0	0	0	0	0	0	0	0	0	0	0	0	0	1	0	0	0	0	0	0	0	0	0	0	0	0	0	0	0	0	0	0	0
GI21	SAPA_G0691	WR-10-02783_111212_5.remap_scaffold7_orf00018	Small terminase subunit	Phage	-	218	-	3378		0	0	0	0	0	0	0	0	0	0	0	0	0	0	0	0	0	0	0	0	1	0	0	0	0	0	0	0	0	0	0	0	0	0	0	0	0	0	0	0
GI21	SAPA_G0692	WR-10-02783_111212_5.remap_scaffold7_orf00020	N protein	Phage	-	383	-	3379		0	0	0	0	0	0	0	0	0	0	0	0	0	0	0	0	0	0	0	0	1	0	0	0	0	0	0	0	0	0	0	0	0	0	0	0	0	0	0	0
GI21	SAPA_G0693	WR-10-02783_111212_5.remap_scaffold7_orf00021	O protein	Phage	-	276	-	3380		0	0	0	0	0	0	0	0	0	0	0	0	0	0	0	0	0	0	0	0	1	0	0	0	0	0	0	0	0	0	0	0	0	0	0	0	0	0	0	0
GI21	SAPA_G0694	SeAg_B2864	phage head completion protein	Phage	-	154	-	3381		1	1	1	1	1	1	1	1	1	1	1	1	1	1	0	1	1	1	1	0	0	1	1	1	1	1	1	1	1	1	0	0	0	0	0	1	1	1	0	1
GI21	SAPA_G0695	SeAg_B2865	terminase, endonuclease subunit	Phage	-	216	-	3382		1	1	1	1	1	1	1	1	1	1	1	1	1	1	0	1	1	1	1	0	0	1	1	1	1	1	1	1	1	1	0	0	0	0	0	1	1	1	0	1
GI21	SAPA_G0696	SeAg_B2866	phage major capsid protein, P2 family	Phage	-	353	-	3383		1	1	1	1	1	1	1	1	1	1	1	1	1	1	0	1	1	1	1	0	0	1	1	1	1	1	1	1	1	1	0	0	0	0	0	1	1	1	0	1
GI21	SAPA_G0697	SeAg_B2867	phage capsid scaffolding protein	Phage	-	277	-	3384		1	1	1	1	1	1	1	1	1	1	1	1	1	1	0	1	1	1	1	0	0	1	1	1	1	1	1	1	1	1	0	0	0	0	0	1	1	1	0	1
GI21	SAPA_G0698	SeAg_B2868	terminase, ATPase subunit	Phage	-	588	-	3385		1	1	1	1	1	1	1	1	1	1	1	1	1	1	0	1	1	1	1	0	1	1	1	1	1	1	1	1	1	1	0	0	0	0	0	1	1	1	0	1
GI21	SAPA_G0699	WR-10-02783_111212_5.remap_scaffold7_orf00023	Fels-2 prophage protein	Phage	-	350	-	3386		0	0	0	0	0	0	0	0	0	0	0	0	0	0	0	0	0	0	0	0	1	0	0	0	0	0	0	0	0	0	0	0	0	0	0	0	0	0	0	0
GI21	SAPA_G0700	WR-10-02783_111212_5.remap_scaffold7_orf00025	RloA protein	Phage	-	422	rloA	3387		0	0	0	0	0	0	0	0	0	0	0	0	0	0	0	0	0	0	0	0	1	0	0	0	0	0	0	0	0	0	0	0	0	0	0	0	0	0	0	0
GI21	SAPA_G0701	WR-10-02783_111212_5.remap_scaffold7_orf00026	Putative lipoprotein	Phage	-	293	-	3388		0	0	0	0	0	0	0	0	0	0	0	0	0	0	0	0	0	0	0	0	1	0	0	0	0	0	0	0	0	0	0	0	0	0	0	0	0	0	0	0
GI21	SAPA_G0702	t3412	possible lipoprotein	Phage	-	99	-	3389		0	0	0	0	0	0	0	0	0	0	0	0	0	0	0	0	0	0	0	0	1	0	0	0	0	0	0	0	0	0	0	0	0	0	0	0	0	0	0	0
GI21	SAPA_G0703	SeAg_B2869	phage portal protein, pbsx family	Phage	-	342	-	3390		1	1	1	1	1	1	1	1	1	1	1	1	1	1	0	1	1	1	1	0	0	1	1	1	1	1	1	1	1	1	0	0	0	0	0	1	1	1	0	1
GI21	SAPA_G0704	WS0243.scaffold_scaffold24_orf00087	Protein-transmembrane prediction, putative	Phage	-	478	-	3391		0	0	0	0	0	0	0	0	0	0	0	0	0	0	0	0	0	0	0	0	0	0	0	0	0	0	0	0	0	0	0	0	0	0	0	0	0	0	0	0
GI21	SAPA_G0705	DBS_20080506_111212_2.remap_scaffold2_orf00030	Putative uncharacterized protein	Phage	-	581	-	3392		0	0	0	0	0	0	0	0	0	0	0	0	0	0	0	1	0	0	0	0	0	0	0	0	0	0	0	0	0	0	0	0	0	0	0	0	0	0	0	0
GI21	SAPA_G0706	STM2726	Fels-2 prophage protein	Phage	-	243	-	3393		0	0	0	0	0	0	0	0	0	0	0	0	0	0	0	1	0	0	0	0	0	0	0	0	0	0	0	0	0	0	0	0	0	0	0	0	0	0	0	0
GI21	SAPA_G0707	SF_080024249.scaffold_scaffold1_orf00090	EagI restriction endonuclease	Phage	-	306	-	3394		1	1	1	1	1	1	1	1	1	1	1	1	1	1	0	0	0	0	0	0	0	0	0	0	0	0	0	0	0	0	0	0	0	0	0	0	0	0	0	1
GI21	SAPA_G0708	MC_08-1117.scaffold_scaffold1_orf00089	Cytosine-specific methyltransferase	Phage	-	401	pliMCI	3395		1	1	1	1	1	1	1	1	1	1	1	1	1	1	0	0	0	0	0	0	0	0	0	0	0	0	0	0	0	0	0	0	0	0	0	0	0	0	0	1
GI21	SAPA_G0709	DBS_20005023.scaffold_scaffold1_orf00085	LF_82	Phage	-	87	-	3396		0	0	0	0	0	0	0	0	0	0	0	0	0	0	0	0	0	0	0	0	0	0	0	0	0	0	0	0	0	0	0	0	0	0	0	1	0	0	0	0
GI21	SAPA_G0710	SeAg_B2870	conserved hypothetical protein	Phage	-	554	-	3397		0	0	0	0	0	0	0	0	0	0	0	0	0	0	0	0	0	0	0	0	0	1	1	1	1	1	1	1	1	1	0	0	0	0	0	0	0	0	0	0
GI21	SAPA_G0711	SeAg_B2871	conserved hypothetical protein	Phage	-	351	-	3398		0	0	0	0	0	0	0	0	0	0	0	0	0	0	0	0	0	0	0	0	0	1	1	1	1	1	1	1	1	1	0	0	0	0	0	0	0	0	0	0
GI21	SAPA_G0712	SeAg_B2872	conserved domain protein	Phage	-	78	-	3399		0	0	0	0	0	0	0	0	0	0	0	0	0	0	0	1	1	1	1	0	0	1	1	1	1	1	1	1	1	1	0	0	0	0	0	1	1	1	0	0
GI21	SAPA_G0713	SeAg_B2873	conserved hypothetical protein	Phage	-	62	-	3400		1	1	1	1	1	1	1	1	1	1	1	1	1	1	0	1	1	1	1	0	1	1	1	1	1	1	1	1	1	1	0	0	0	0	0	1	1	1	0	1
GI21	SAPA_G0714	SeAg_B2874	hypothetical protein	Phage	-	42	-	3401		1	1	1	1	1	1	1	1	1	1	1	1	1	1	0	1	1	1	1	0	1	1	1	1	1	1	1	1	1	1	0	0	0	0	0	1	1	1	0	1
GI21	SAPA_G0715	SeAg_B2875	bacteriophage replication gene A	Phage	-	746	-	3402		1	1	1	1	1	1	1	1	1	1	1	1	1	1	0	1	1	1	1	0	1	1	1	1	1	1	1	1	1	1	0	0	0	0	0	1	1	1	0	1
GI21	SAPA_G0716	MC_05-0209.scaffold_C2650_orf00012	Methyltransferase, putative	Phage	-	333	-	3403		0	0	0	0	0	0	0	0	0	0	0	0	0	0	0	0	0	0	0	0	0	0	0	0	0	0	0	0	0	0	0	0	0	0	0	0	0	0	0	0
GI21	SAPA_G0717	MC_08-0771.scaffold_scaffold1_orf00086	Site-specific DNA-methyltransferase (Adenine-specific)	Phage	-	286	-	3404		1	1	1	1	1	1	1	1	1	1	1	1	1	1	0	0	0	0	0	0	0	0	0	0	0	0	0	0	0	0	0	0	0	0	0	0	0	0	0	1
GI21	SAPA_G0718	SeAg_B2876	retron EC67 DNA adenine methylase	Phage	-	285	-	3405		0	0	0	0	0	0	0	0	0	0	0	0	0	0	0	1	1	1	1	0	1	1	1	1	1	1	1	1	1	1	0	0	0	0	0	1	1	1	0	0
GI21	SAPA_G0719	SeAg_B2877	C4-type zinc finger protein, DksA/TraR family	Phage	-	75	-	3406		0	0	0	0	0	0	0	0	0	0	0	0	0	0	0	1	1	1	1	0	1	1	1	1	1	1	1	1	1	1	0	0	0	0	0	1	1	1	0	0
GI21	SAPA_G0720	SeAg_B2878	conserved hypothetical protein	Phage	-	77	-	3407		0	0	0	0	0	0	0	0	0	0	0	0	0	0	0	1	0	0	0	0	1	1	1	1	1	1	1	1	1	1	0	0	0	0	0	0	0	0	0	0
GI21	SAPA_G0721	DBS_20062828_111212_2.remap_scaffold59_orf00044	hypothetical protein	Phage	-	415	-	3408		0	0	0	0	0	0	0	0	0	0	0	0	0	0	0	0	0	0	0	0	0	0	0	0	0	0	0	0	0	0	0	0	0	0	0	0	0	0	0	0
GI21	SAPA_G0722	SeAg_B2879	conserved hypothetical protein	Phage	-	113	-	3409		1	1	1	1	1	1	1	1	1	1	1	1	1	1	0	1	1	1	1	0	1	1	1	1	1	1	1	1	1	1	0	0	0	0	0	1	1	1	0	1
GI21	SAPA_G0723	SeAg_B2880	phage regulatory protein	Phage	-	169	-	3410		1	1	1	1	1	1	1	1	1	1	1	1	1	1	0	1	1	1	1	0	1	1	1	1	1	1	1	1	1	1	0	0	0	0	0	1	1	1	0	1
GI21	SAPA_G0724	SeAg_B2881	phage regulatory protein	Phage	-	79	-	3411		1	1	1	1	1	1	1	1	1	1	1	1	1	1	0	1	0	0	0	0	1	1	1	1	1	1	1	1	1	1	0	0	0	0	0	0	0	0	0	1
GI21	SAPA_G0725	t4337	phage repressor protein cI	Phage	-	210	-	3412		0	0	0	0	0	0	0	0	0	0	0	0	0	0	0	1	0	0	0	0	0	1	1	1	1	1	1	1	1	1	0	0	0	0	0	0	0	0	0	0
GI21	SAPA_G0726	SeAg_B2882	phage integrase	Phage	-	341	-	3413		1	1	1	1	1	1	1	1	1	1	1	1	1	1	0	1	1	1	1	0	1	1	1	1	1	1	1	1	1	1	0	0	0	0	0	1	1	1	0	1
GI21	SAPA_G0727	MC_06-0623.scaffold_scaffold1_orf00074	Putative uncharacterized protein	Phage	-	409	-	3414		1	1	1	1	1	1	1	1	1	1	1	1	1	1	0	0	0	0	0	0	0	0	0	0	0	0	0	0	0	0	0	0	0	0	0	0	0	0	0	1
GI21	SAPA_G0728	DBS_20080506_111212_2.remap_scaffold2_orf00043	hypothetical protein	Phage	-	367	-	3415		0	0	0	0	0	0	0	0	0	0	0	0	0	0	0	1	0	0	0	0	0	0	0	0	0	0	0	0	0	0	0	0	0	0	0	0	0	0	0	0
GI21	SAPA_G0729	DBS_20005023.scaffold_scaffold1_orf00072	Uncharacterized conserved protein	Phage	-	507	-	3416		0	0	0	0	0	0	0	0	0	0	0	0	0	0	0	0	0	0	0	0	0	0	0	0	0	0	0	0	0	0	0	0	0	0	0	1	0	0	0	0
GI21	SAPA_G0730	SF_R0374_09.scaffold_scaffold8_orf00016	Phage integrase family protein	Phage	-	399	-	3417		0	0	0	0	0	0	0	0	0	0	0	0	0	0	0	0	0	0	0	0	0	0	0	0	0	0	0	0	0	0	0	0	0	0	0	0	0	0	0	0
GI21	SAPA_G0731	DBS_20001356.scaffold_scaffold21_orf00048	DEAD/DEAH box helicase domain protein	Phage	-	860	-	3418		0	0	0	0	0	0	0	0	0	0	0	0	0	0	0	0	0	0	0	0	0	0	0	0	0	0	0	0	0	0	0	0	0	0	0	0	0	0	0	0
GI21	SAPA_G0732	DBS_20001356.scaffold_scaffold21_orf00049	Bll2187 protein	Phage	-	315	-	3419		0	0	0	0	0	0	0	0	0	0	0	0	0	0	0	0	0	0	0	0	0	0	0	0	0	0	0	0	0	0	0	0	0	0	0	0	0	0	0	0
GI21	SAPA_G0733	CS_CC08.043_111212_1.remap_scaffold44_orf00083	P4 psu-like protein	Phage	-	191	-	3420		0	0	0	0	0	0	0	0	0	0	0	0	0	0	0	0	0	0	0	0	0	0	0	0	0	0	0	0	0	0	0	0	0	0	1	0	0	0	0	0
GI21	SAPA_G0734	DBS_20001356.scaffold_C2449_orf00003	Glycoprotein 3, capsid size determination protein Sid	Phage	-	245	-	3421		0	0	0	0	0	0	0	0	0	0	0	0	0	0	0	0	0	0	0	0	0	0	0	0	0	0	0	0	0	0	0	0	0	0	1	0	0	0	0	0
GI21	SAPA_G0735	DBS_20001356.scaffold_C2401_orf00001	Phage transcriptional regulator, AlpA	Phage	-	89	-	3422		0	0	0	0	0	0	0	0	0	0	0	0	0	0	0	0	0	0	0	0	0	0	0	0	0	0	0	0	0	0	0	0	0	0	1	0	0	0	0	0
GI21	SAPA_G0736	CS_CC08.043_111212_1.remap_scaffold44_orf00090	Phage protein	Phage	-	197	-	3423		0	0	0	0	0	0	0	0	0	0	0	0	0	0	0	0	0	0	0	0	0	0	0	0	0	0	0	0	0	0	0	0	0	0	1	0	0	0	0	0
GI21	SAPA_G0737	CS_CC08.043_111212_1.remap_scaffold44_orf00091	Derepression protein,COG2213	Phage	-	96	-	3424		0	0	0	0	0	0	0	0	0	0	0	0	0	0	0	0	0	0	0	0	0	0	0	0	0	0	0	0	0	0	0	0	0	0	1	0	0	0	0	0
GI21	SAPA_G0738	DBS_20001356.scaffold_C2453_orf00001	P4 prophage-derived protein	Phage	-	152	-	3425		0	0	0	0	0	0	0	0	0	0	0	0	0	0	0	0	0	0	0	0	0	0	0	0	0	0	0	0	0	0	0	0	0	0	1	0	0	0	0	0
GI21	SAPA_G0739	DBS_20001356.scaffold_C2453_orf00002	Cnr-like protein	Phage	-	107	-	3426		0	0	0	0	0	0	0	0	0	0	0	0	0	0	0	0	0	0	0	0	0	0	0	0	0	0	0	0	0	0	0	0	0	0	1	0	0	0	0	0
GI21	SAPA_G0740	CS_CC08.043_111212_1.remap_scaffold44_orf00095	Phage/plasmid primase, P4 family	Phage	-	778	-	3427		0	0	0	0	0	0	0	0	0	0	0	0	0	0	0	0	0	0	0	0	0	0	0	0	0	0	0	0	0	0	0	0	0	0	1	0	0	0	0	0
GI22	SAPA_G0742	SeAg_B2996	type III secretion apparatus protein PrgH/EprH	Genomic	-	354	eprH	3535		1	1	1	1	1	1	1	1	1	1	1	1	1	1	1	1	1	1	1	1	1	1	1	1	1	1	1	1	1	1	1	1	1	1	1	1	1	1	0	1
GI22	SAPA_G0743	SeAg_B2997	transcriptional regulator HilD	Genomic	-	309	-	3536		1	1	1	1	1	1	1	1	1	1	1	1	1	1	1	1	1	1	1	1	1	1	1	1	1	1	1	1	1	1	1	1	1	1	1	1	1	1	0	1
GI22	SAPA_G0744	SeAg_B2998	transcriptional regulator HilA	Genomic	-	553	-	3537		1	1	1	1	1	1	1	1	1	1	1	1	1	1	1	1	1	1	1	1	1	1	1	1	1	1	1	1	1	1	1	1	1	1	1	1	1	1	0	1
GI22	SAPA_G0745	SeAg_B2999	invasion protein IagB	Genomic	-	160	lagB	3538		1	1	1	1	1	1	1	1	1	1	1	1	1	1	1	1	1	1	1	1	1	1	1	1	1	1	1	1	1	1	1	1	1	1	1	1	1	1	0	1
GI22	SAPA_G0746	SeAg_B3000	effector protein SptP	Genomic	-	535	-	3539		1	1	1	1	1	1	1	1	1	1	1	1	1	1	1	1	1	1	1	1	1	1	1	1	1	1	1	1	1	1	1	1	1	1	1	1	1	1	0	1
GI22	SAPA_G0747	SeAg_B3001	secretion chaparone	Genomic	-	130	-	3540		1	1	1	1	1	1	1	1	1	1	1	1	1	1	1	1	1	1	1	1	1	1	1	1	1	1	1	1	1	1	1	1	1	1	1	1	1	1	0	1
GI22	SAPA_G0748	SeAg_B3002	hypothetical protein	Genomic	-	74	-	3541		1	1	1	1	1	1	1	1	1	1	1	1	1	1	1	1	1	1	1	1	1	1	1	1	1	1	1	1	1	1	1	1	1	1	1	1	1	1	0	1
GI22	SAPA_G0749	SeAg_B3003	acyl carrier protein	Genomic	-	82	-	3542		1	1	1	1	1	1	1	1	1	1	1	1	1	1	1	1	1	1	1	1	1	1	1	1	1	1	1	1	1	1	1	1	1	1	1	1	1	1	0	1
GI22	SAPA_G0750	SeAg_B3004	cell invasion protein SipA	Genomic	-	670	-	3543		1	1	1	1	1	1	1	1	1	1	1	1	1	1	1	1	1	1	1	1	1	1	1	1	1	1	1	1	1	1	1	1	1	1	1	1	1	1	0	1
GI22	SAPA_G0751	SeAg_B3005	type III effector protein IpaD/SipD/SspD	Genomic	-	343	-	3544		1	1	1	1	1	1	1	1	1	1	1	1	1	1	1	1	1	1	1	1	1	1	1	1	1	1	1	1	1	1	1	1	1	1	1	1	1	1	0	1
GI22	SAPA_G0752	SeAg_B3006	cell invasion protein SipC (Effector protein sipC)	Genomic	-	410	-	3545		1	1	1	1	1	1	1	1	1	1	1	1	1	1	1	1	1	1	1	1	1	1	1	1	1	1	1	1	1	1	1	1	1	1	1	1	1	1	0	1
GI22	SAPA_G0753	SeAg_B3007	cell invasion protein SipB	Genomic	-	593	-	3546		1	1	1	1	1	1	1	1	1	1	1	1	1	1	1	1	1	1	1	1	1	1	1	1	1	1	1	1	1	1	1	1	1	1	1	1	1	1	0	1
GI22	SAPA_G0754	SeAg_B3008	type III secretion low calcium response chaperone LcrH/SycD	Genomic	-	165	-	3547		1	1	1	1	1	1	1	1	1	1	1	1	1	1	1	1	1	1	1	1	1	1	1	1	1	1	1	1	1	1	1	1	1	1	1	1	1	1	0	1
GI22	SAPA_G0755	SeAg_B3009	type III secretion protein	Genomic	-	356	-	3548		1	1	1	1	1	1	1	1	1	1	1	1	1	1	1	1	1	1	1	1	1	1	1	1	1	1	1	1	1	1	1	1	1	1	1	1	1	1	0	1
GI22	SAPA_G0756	SeAg_B3010	type III secretion apparatus protein SpaR/YscT/HrcT	Genomic	-	263	epaR	3549		1	1	1	1	1	1	1	1	1	1	1	1	1	1	1	1	1	1	1	1	1	1	1	1	1	1	1	1	1	1	1	1	1	1	1	1	1	1	0	1
GI22	SAPA_G0757	SeAg_B3011	EpaQ	Genomic	-	86	-	3550		1	1	1	1	1	1	1	1	1	1	1	1	1	1	1	1	1	1	1	1	1	1	1	1	1	1	1	1	1	1	1	1	1	1	1	1	1	1	0	1
GI22	SAPA_G0758	SeAg_B3012	type III secretion apparatus protein, YscR/HrcR family	Genomic	-	224	epaP	3551		1	1	1	1	1	1	1	1	1	1	1	1	1	1	1	1	1	1	1	1	1	1	1	1	1	1	1	1	1	1	1	1	1	1	1	1	1	1	0	1
GI22	SAPA_G0759	SeAg_B3013	type III secretion apparatus protein, YscQ/HrcQ family	Genomic	-	303	epaO	3552		1	1	1	1	1	1	1	1	1	1	1	1	1	1	1	1	1	1	1	1	1	1	1	1	1	1	1	1	1	1	1	1	1	1	1	1	1	1	0	1
GI22	SAPA_G0760	SeAg_B3014	antigen presentation protein SpaN	Genomic	-	336	invJ	3553		1	1	1	1	1	1	1	1	1	1	1	1	1	1	1	1	1	1	1	1	1	1	1	1	1	1	1	1	1	1	1	1	1	1	1	1	1	1	0	1
GI22	SAPA_G0761	SeAg_B3015	surface presentation of antigens protein spaM	Genomic	-	147	invI	3554		1	1	1	1	1	1	1	1	1	1	1	1	1	1	1	1	1	1	1	1	1	1	1	1	1	1	1	1	1	1	1	1	1	1	1	1	1	1	0	1
GI22	SAPA_G0762	SeAg_B3016	flagellum-specific ATP synthase	Genomic	-	431	invC	3555		1	1	1	1	1	1	1	1	1	1	1	1	1	1	1	1	1	1	1	1	1	1	1	1	1	1	1	1	1	1	1	1	1	1	1	1	1	1	0	1
GI22	SAPA_G0763	SeAg_B3017	surface presentation of antigens protein SpaK	Genomic	-	135	invB	3556		1	1	1	1	1	1	1	1	1	1	1	1	1	1	1	1	1	1	1	1	1	1	1	1	1	1	1	1	1	1	1	1	1	1	1	1	1	1	0	1
GI22	SAPA_G0764	SeAg_B3018	invasion protein InvA	Genomic	-	685	invA	3557		1	1	1	1	1	1	1	1	1	1	1	1	1	1	1	1	1	1	1	1	1	1	1	1	1	1	1	1	1	1	1	1	1	1	1	1	1	1	0	1
GI22	SAPA_G0765	SeAg_B3019	invasion protein InvE	Genomic	-	372	invE	3558		1	1	1	1	1	1	1	1	1	1	1	1	1	1	1	1	1	1	1	1	1	1	1	1	1	1	1	1	1	1	1	1	1	1	1	1	1	1	0	1
GI22	SAPA_G0766	SeAg_B3020	type III secretion outer membrane pore, YscC/HrcC family	Genomic	-	514	invG	3559		1	1	1	1	1	1	1	1	1	1	1	1	1	1	1	1	1	1	1	1	1	1	1	1	1	1	1	1	1	1	1	1	1	1	1	1	1	1	0	1
GI22	SAPA_G0767	SeAg_B3021	invasion protein	Genomic	-	249	invF	3560		1	1	1	1	1	1	1	1	1	1	1	1	1	1	1	1	1	1	1	1	1	1	1	1	1	1	1	1	1	1	1	1	1	1	1	1	1	1	0	1
GI22	SAPA_G0768	SeAg_B3022	cell adherance/invasion protein	Genomic	-	147	invH	3561		1	1	1	1	1	1	1	1	1	1	1	1	1	1	1	1	1	1	1	1	1	1	1	1	1	1	1	1	1	1	1	1	1	1	1	1	1	1	0	1
GI22	SAPA_G0769	SeAg_B3023	putative cytoplasmic protein	Genomic	-	108	-	3562		1	1	1	1	1	1	1	1	1	1	1	1	1	1	1	1	1	1	1	1	1	1	1	1	1	1	1	1	1	1	1	1	1	1	1	1	1	1	0	1
GI22	SAPA_G0770	SeAg_B3024	putative ABC-type transport system	Genomic	-	93	-	3563		1	1	1	1	1	1	1	1	1	1	1	1	1	1	1	1	1	1	1	1	1	1	1	1	1	1	1	1	1	1	1	1	1	1	1	1	1	1	0	1
GI22	SAPA_G0771	SeAg_B3025	acetyltransferase, gnat family	Genomic	-	175	-	3564		1	1	1	1	1	1	1	1	1	1	1	1	1	1	1	1	1	1	1	1	1	1	1	1	1	1	1	1	1	1	1	1	1	1	1	1	1	1	0	1
GI22	SAPA_G0773	SeAg_B3027	serine/threonine-protein phosphatase 2	Genomic	-	218	-	3566		1	1	1	1	1	1	1	1	1	1	1	1	1	1	1	1	1	1	1	1	1	1	1	1	1	1	1	1	1	1	1	1	1	1	1	1	1	1	0	1
GI22	SAPA_G0774	SeAg_B3028	conserved hypothetical protein	Genomic	-	164	-	3567		1	1	1	1	1	1	1	1	1	1	1	1	1	1	1	1	1	1	1	1	1	1	1	1	1	1	1	1	1	1	1	1	1	1	1	1	1	1	0	1
GI22	SAPA_G0775	SeAg_B3029	conserved hypothetical protein	Genomic	-	222	-	3568		1	1	1	1	1	1	1	1	1	1	1	1	1	1	1	1	1	1	1	1	1	1	1	1	1	1	1	1	1	1	1	1	1	1	1	1	1	1	0	1
GI22	SAPA_G0776	SeAg_B3030	DNA mismatch repair protein MutS	Genomic	-	855	mutS	3569		1	1	1	1	1	1	1	1	1	1	1	1	1	1	1	1	1	1	1	1	1	1	1	1	1	1	1	1	1	1	1	1	1	1	1	1	1	1	0	1
GI22	SAPA_G0777	SeAg_B3031	putative cytoplasmic protein	Genomic	-	126	-	3570		1	1	1	1	1	1	1	1	1	1	1	1	1	1	1	1	1	1	1	1	1	1	1	1	1	1	1	1	1	1	1	1	1	1	1	1	1	1	0	1
GI22	SAPA_G0778	SeAg_B3032	major facilitator family transporter	Genomic	-	402	-	3571		1	1	1	1	1	1	1	1	1	1	1	1	1	1	1	1	1	1	1	1	1	1	1	1	1	1	1	1	1	1	1	1	1	1	1	1	1	1	0	1
GI22	SAPA_G0779	SeAg_B3033	transcriptional regulator, LysR family	Genomic	-	303	-	3572		1	1	1	1	1	1	1	1	1	1	1	1	1	1	1	1	1	1	1	1	1	1	1	1	1	1	1	1	1	1	1	1	1	1	1	1	1	1	0	1
GI22	SAPA_G0780	SeAg_B3034	GntP	Genomic	-	498	-	3573		1	1	1	1	1	1	1	1	1	1	1	1	1	1	1	1	1	1	1	1	1	1	1	1	1	1	1	1	1	1	1	1	1	1	1	1	1	1	0	1
GI22	SAPA_G0781	SeAg_B3035	NAD dependent epimerase/dehydratase family protein	Genomic	-	316	-	3574		1	1	1	1	1	1	1	1	1	1	1	1	1	1	1	1	1	1	1	1	1	1	1	1	1	1	1	1	1	1	1	1	1	1	1	1	1	1	0	1
GI22	SAPA_G0782	SeAg_B3036	hydroxypyruvate isomerase	Genomic	-	258	-	3575		1	1	1	1	1	1	1	1	1	1	1	1	1	1	1	1	1	1	1	1	1	1	1	1	1	1	1	1	1	1	1	1	1	1	1	1	1	1	0	1
GI22	SAPA_G0783	SeAg_B3037	aldolase class II protein YgbL	Genomic	-	212	-	3576		1	1	1	1	1	1	1	1	1	1	1	1	1	1	1	1	1	1	1	1	1	1	1	1	1	1	1	1	1	1	1	1	1	1	1	1	1	1	0	1
GI22	SAPA_G0784	SeAg_B3038	YgbK domain protein	Genomic	-	420	Ipx53	3577		1	1	1	1	1	1	1	1	1	1	1	1	1	1	1	1	1	1	1	1	1	1	1	1	1	1	1	1	1	1	1	1	1	1	1	1	1	1	0	1
GI22	SAPA_G0785	SeAg_B3039	MmsB protein	Genomic	-	307	-	3578		1	1	1	1	1	1	1	1	1	1	1	1	1	1	1	1	1	1	1	1	1	1	1	1	1	1	1	1	1	1	1	1	1	1	1	1	1	1	0	1
GI22	SAPA_G0786	SeAg_B3040	transcriptional regulator, DeoR family	Genomic	-	254	-	3579		1	1	1	1	1	1	1	1	1	1	1	1	1	1	1	1	1	1	1	1	1	1	1	1	1	1	1	1	1	1	1	1	1	1	1	1	1	1	0	1
GI22	SAPA_G0787	SeAg_B3041	transcriptional regulator HosA	Genomic	-	134	-	3580		1	1	1	1	1	1	1	1	1	1	1	1	1	1	1	1	1	1	1	1	1	1	1	1	1	1	1	1	1	1	1	1	1	1	1	1	1	1	0	1
GI22	SAPA_G0788	SeAg_B3042	4-hydroxybenzoate decarboxylase, subunit B	Genomic	-	197	kpdB	3581		1	1	1	1	1	1	1	1	1	1	1	1	1	1	1	1	1	1	1	1	1	1	1	1	1	1	1	1	1	1	1	1	1	1	1	1	1	1	0	1
GI22	SAPA_G0789	SeAg_B3043	4-hydroxybenzoate decarboxylase, subunit C	Genomic	-	475	kpdC	3582		1	1	1	1	1	1	1	1	1	1	1	1	1	1	1	1	1	1	1	1	1	1	1	1	1	1	1	1	1	1	1	1	1	1	1	1	1	1	0	1
GI22	SAPA_G0790	SeAg_B3044	4-hydroxybenzoate decarboxylase, subunit D	Genomic	-	78	kpdD	3583		1	1	1	1	1	1	1	1	1	1	1	1	1	1	1	1	1	1	1	1	1	1	1	1	1	1	1	1	1	1	1	1	1	1	1	1	1	1	0	1
GI22	SAPA_G0791	SeAg_B3045	RNA polymerase sigma factor RpoS	Genomic	-	68	-	3584		1	1	1	1	1	1	1	1	1	1	1	1	1	1	1	1	1	1	1	1	1	1	1	1	1	1	1	1	1	1	1	1	1	1	1	1	1	1	0	1
GI22	SAPA_G0792	SeAg_B3048	RNA polymerase sigma factor RpoS	Genomic	-	269	-	3585		1	1	1	1	1	1	1	1	1	1	1	1	1	1	1	1	1	1	1	1	1	1	1	1	1	1	1	1	1	1	1	1	1	1	1	1	1	1	0	1
GI22	SAPA_G0793	SeAg_B3049	conserved hypothetical protein	Genomic	-	49	-	3586		1	1	1	1	1	1	1	1	1	1	1	1	1	1	1	1	1	1	1	1	1	1	1	1	1	1	1	1	1	1	1	1	1	1	1	1	1	1	0	1
GI23	SAPA_G0794	SeAg_B3097	GTP diphosphokinase	Genomic	-	744	relA	3633		1	1	1	1	1	1	1	1	1	1	1	1	1	1	1	1	1	1	1	1	1	1	1	1	1	1	1	1	1	1	1	1	1	1	1	1	1	1	1	1
GI23	SAPA_G0795	SeAg_B3098	23S rRNA (uracil-5-)-methyltransferase RumA	Genomic	-	431	rumA	3634		1	1	1	1	1	1	1	1	1	1	1	1	1	1	1	1	1	1	1	1	1	1	1	1	1	1	1	1	1	1	1	1	1	1	1	1	1	1	1	1
GI24	SAPA_G0796	MC_06-0567_111212_3.remap_scaffold1_orf00453	Putative phage integrase	ICE	-	330	-	3806		1	1	1	1	1	1	1	0	0	0	0	0	0	0	0	0	0	0	0	0	0	0	0	0	0	0	0	0	0	0	0	0	0	0	0	0	0	0	0	0
GI24	SAPA_G0797	MC_05-0587_111212_2.remap_scaffold1_orf00453	Putative helicase	ICE	-	430	-	3807		1	1	1	1	1	1	1	0	0	0	0	0	0	0	0	0	0	0	0	0	0	0	0	0	0	0	0	0	0	0	0	0	0	0	0	0	0	0	0	0
GI24	SAPA_G0798	MC_05-0750_111212_3.remap_scaffold1_orf00453	Putative UvrD protein	ICE	MOBH	503	-	3808		1	1	1	1	1	1	1	0	0	0	0	0	0	0	0	0	0	0	0	0	0	0	0	0	0	0	0	0	0	0	0	0	0	0	0	0	0	0	0	0
GI24	SAPA_G0799	MC_05-0750_111212_3.remap_scaffold1_orf00457	type IV pilus biogenesis outer membrane protein precursor PilL	ICE	-	147	-	3809		1	1	1	1	1	1	1	0	0	0	0	0	0	0	0	0	0	0	0	0	0	0	0	0	0	0	0	0	0	0	0	0	0	0	0	0	0	0	0	0
GI24	SAPA_G0800	MC_05-0582_111212_2.remap_C2678_orf00012	Putative PilM protein	ICE	-	146	-	3810		1	1	1	1	1	1	1	0	0	0	0	0	0	0	0	0	0	0	0	0	0	0	0	0	0	0	0	0	0	0	0	0	0	0	0	0	0	0	0	0
GI24	SAPA_G0801	MC_05-0602_111212_2.remap_C2825_orf00011	PilN	ICE	-	542	-	3811		1	1	1	1	1	1	1	0	0	0	0	0	0	0	0	0	0	0	0	0	0	0	0	0	0	0	0	0	0	0	0	0	0	0	0	0	0	0	0	0
GI24	SAPA_G0802	MC_05-0587_111212_2.remap_scaffold1_orf00464	Putative Pilin accessory protein pilO	ICE	-	432	-	3812		1	1	1	1	1	1	1	0	0	0	0	0	0	0	0	0	0	0	0	0	0	0	0	0	0	0	0	0	0	0	0	0	0	0	0	0	0	0	0	0
GI24	SAPA_G0803	MC_05-0750_111212_3.remap_C3228_orf00004	Pilus type IV assembly protein	ICE	-	154	pilP	3813		1	1	1	1	1	1	1	0	0	0	0	0	0	0	0	0	0	0	0	0	0	0	0	0	0	0	0	0	0	0	0	0	0	0	0	0	0	0	0	0
GI24	SAPA_G0804	MC_05-0632_batch3.remap_scaffold56_orf00302	Type IV pilus	ICE	-	507	pilQ	3814		1	1	1	1	1	1	1	0	0	0	0	0	0	0	0	0	0	0	0	0	0	0	0	0	0	0	0	0	0	0	0	0	0	0	0	0	0	0	0	0
GI24	SAPA_G0805	MC_05-0601_111212_2.remap_scaffold1_orf00469	Type IV pilus integral inner membrane protein	ICE	-	367	-	3815		1	1	1	1	1	1	1	0	0	0	0	0	0	0	0	0	0	0	0	0	0	0	0	0	0	0	0	0	0	0	0	0	0	0	0	0	0	0	0	0
GI24	SAPA_G0806	MC_06-0567_111212_3.remap_C2641_orf00004	Major pillin subunit	ICE	-	179	pilS	3816		1	1	1	1	1	1	1	0	0	0	0	0	0	0	0	0	0	0	0	0	0	0	0	0	0	0	0	0	0	0	0	0	0	0	0	0	0	0	0	0
GI24	SAPA_G0807	MC_05-0750_111212_3.remap_C3228_orf00009	Peptidoglycan-binding-like protein	ICE	-	159	-	3817		1	1	1	1	1	1	1	0	0	0	0	0	0	0	0	0	0	0	0	0	0	0	0	0	0	0	0	0	0	0	0	0	0	0	0	0	0	0	0	0
GI24	SAPA_G0808	MC_06-0567_111212_3.remap_C2641_orf00002	Prepilin peptidase	ICE	-	139	pilU	3818		1	1	1	1	1	1	1	0	0	0	0	0	0	0	0	0	0	0	0	0	0	0	0	0	0	0	0	0	0	0	0	0	0	0	0	0	0	0	0	0
GI24	SAPA_G0809	MC_05-0632_batch3.remap_scaffold56_orf00309	Minor pilin subunit	ICE	-	332	pilV	3819		1	1	1	1	1	1	1	0	0	0	0	0	0	0	0	0	0	0	0	0	0	0	0	0	0	0	0	0	0	0	0	0	0	0	0	0	0	0	0	0
GI24	SAPA_G0810	MC_05-0632_batch3.remap_scaffold56_orf00311	Site-specific recombinase, phage integrase family (Fragment)	ICE	-	461	rci	3820		1	1	1	1	1	1	1	0	0	0	0	0	0	0	0	0	0	0	0	0	0	0	0	0	0	0	0	0	0	0	0	0	0	0	0	0	0	0	0	0
GI24	SAPA_G0811	MC_05-0750_111212_3.remap_C3310_orf00002	Conjugal transfer protein	ICE	-	274	-	3821		1	1	1	1	1	1	1	0	0	0	0	0	0	0	0	0	0	0	0	0	0	0	0	0	0	0	0	0	0	0	0	0	0	0	0	0	0	0	0	0
GI24	SAPA_G0812	MC_05-0587_111212_2.remap_scaffold56_orf00003	Conjugal transfer protein	ICE	-	401	TraF	3822		1	1	1	1	1	1	1	0	0	0	0	0	0	0	0	0	0	0	0	0	0	0	0	0	0	0	0	0	0	0	0	0	0	0	0	0	0	0	0	0
GI24	SAPA_G0813	MC_05-0750_111212_3.remap_C3310_orf00005	Putative uncharacterized protein	ICE	-	392	-	3823		1	1	1	1	1	1	1	0	0	0	0	0	0	0	0	0	0	0	0	0	0	0	0	0	0	0	0	0	0	0	0	0	0	0	0	0	0	0	0	0
GI24	SAPA_G0814	MC_05-0602_111212_2.remap_scaffold62_orf00006	Putative uncharacterized protein	ICE	-	109	-	3824		1	1	1	1	1	1	1	0	0	0	0	0	0	0	0	0	0	0	0	0	0	0	0	0	0	0	0	0	0	0	0	0	0	0	0	0	0	0	0	0
GI24	SAPA_G0815	MC_05-0602_111212_2.remap_scaffold62_orf00007	Putative uncharacterized protein	ICE	-	157	-	3825		1	1	1	1	1	1	1	0	0	0	0	0	0	0	0	0	0	0	0	0	0	0	0	0	0	0	0	0	0	0	0	0	0	0	0	0	0	0	0	0
GI24	SAPA_G0816	MC_05-0750_111212_3.remap_C3310_orf00009	Putative uncharacterized protein	ICE	-	321	-	3826		1	1	1	1	1	1	1	0	0	0	0	0	0	0	0	0	0	0	0	0	0	0	0	0	0	0	0	0	0	0	0	0	0	0	0	0	0	0	0	0
GI24	SAPA_G0817	MC_05-0750_111212_3.remap_C3310_orf00010	Putative uncharacterized protein	ICE	-	146	-	3827		1	1	1	1	1	1	1	0	0	0	0	0	0	0	0	0	0	0	0	0	0	0	0	0	0	0	0	0	0	0	0	0	0	0	0	0	0	0	0	0
GI24	SAPA_G0818	MC_05-0750_111212_3.remap_C3310_orf00011	Putative uncharacterized protein	ICE	-	113	-	3828		1	1	1	1	1	1	1	0	0	0	0	0	0	0	0	0	0	0	0	0	0	0	0	0	0	0	0	0	0	0	0	0	0	0	0	0	0	0	0	0
GI24	SAPA_G0819	MC_05-0582_111212_2.remap_C2636_orf00013	Putative uncharacterized protein	ICE	-	120	-	3829		1	1	1	1	1	1	1	0	0	0	0	0	0	0	0	0	0	0	0	0	0	0	0	0	0	0	0	0	0	0	0	0	0	0	0	0	0	0	0	0
GI24	SAPA_G0820	MC_05-0587_111212_2.remap_scaffold56_orf00012	Anti-restriction protein	ICE	-	170	ard	3830		1	1	1	1	1	1	1	0	0	0	0	0	0	0	0	0	0	0	0	0	0	0	0	0	0	0	0	0	0	0	0	0	0	0	0	0	0	0	0	0
GI24	SAPA_G0821	MC_05-0750_111212_3.remap_C3310_orf00016	Putative uncharacterized protein	ICE	-	129	-	3831		1	1	1	1	1	1	1	0	0	0	0	0	0	0	0	0	0	0	0	0	0	0	0	0	0	0	0	0	0	0	0	0	0	0	0	0	0	0	0	0
GI24	SAPA_G0822	MC_05-0582_111212_2.remap_C2636_orf00018	Putative uncharacterized protein	ICE	-	134	-	3832		1	1	1	1	1	1	1	0	0	0	0	0	0	0	0	0	0	0	0	0	0	0	0	0	0	0	0	0	0	0	0	0	0	0	0	0	0	0	0	0
GI24	SAPA_G0823	MC_05-0582_111212_2.remap_scaffold29_orf00002	Putative integrase/DNA breaking-rejoining enzyme	ICE	-	306	-	3833		1	1	1	1	1	1	1	0	0	0	0	0	0	0	0	0	0	0	0	0	0	0	0	0	0	0	0	0	0	0	0	0	0	0	0	0	0	0	0	0
GI24	SAPA_G0824	MC_05-0602_111212_2.remap_scaffold34_orf00003	Replication protein	ICE	-	325	-	3834		1	1	1	1	1	1	1	0	0	0	0	0	0	0	0	0	0	0	0	0	0	0	0	0	0	0	0	0	0	0	0	0	0	0	0	0	0	0	0	0
GI24	SAPA_G0825	MC_05-0602_111212_2.remap_scaffold43_orf00051	Putative membrane protein	ICE	-	218	-	3835		1	1	1	1	1	1	1	0	0	0	0	0	0	0	0	0	0	0	0	0	0	0	0	0	0	0	0	0	0	0	0	0	0	0	0	0	0	0	0	0
GI24	SAPA_G0826	MC_05-0582_111212_2.remap_scaffold26_orf00051	Putative uncharacterized protein	ICE	-	106	-	3836		1	1	1	1	1	1	1	0	0	0	0	0	0	0	0	0	0	0	0	0	0	0	0	0	0	0	0	0	0	0	0	0	0	0	0	0	0	0	0	0
GI24	SAPA_G0827	MC_05-0582_111212_2.remap_scaffold26_orf00048	50S ribosomal protein L31 type B 2	ICE	-	88	rpmE2	3837		1	1	1	1	1	1	1	0	0	0	0	0	0	0	0	0	0	0	0	0	0	0	0	0	0	0	0	0	0	0	0	0	0	0	0	0	0	0	0	0
GI24	SAPA_G0828	MC_05-0632_batch3.remap_scaffold50_orf00039	Putative uncharacterized protein	ICE	-	191	-	3838		1	1	1	1	1	1	1	0	0	0	0	0	0	0	0	0	0	0	0	0	0	0	0	0	0	0	0	0	0	0	0	0	0	0	0	0	0	0	0	0
GI24	SAPA_G0829	MC_06-0567_111212_3.remap_scaffold35_orf00045	Putative TraG-like protein	ICE	-	503	-	3839		1	1	1	1	1	1	1	0	0	0	0	0	0	0	0	0	0	0	0	0	0	0	0	0	0	0	0	0	0	0	0	0	0	0	0	0	0	0	0	0
GI24	SAPA_G0830	MC_05-0601_111212_2.remap_scaffold36_orf00042	Putative membrane protein	ICE	-	120	-	3840		1	1	1	1	1	1	1	0	0	0	0	0	0	0	0	0	0	0	0	0	0	0	0	0	0	0	0	0	0	0	0	0	0	0	0	0	0	0	0	0
GI24	SAPA_G0831	MC_06-0567_111212_3.remap_scaffold35_orf00043	Putative exported protein	ICE	G_ICEHIN1056_000510	473	-	3841		1	1	1	1	1	1	1	0	0	0	0	0	0	0	0	0	0	0	0	0	0	0	0	0	0	0	0	0	0	0	0	0	0	0	0	0	0	0	0	0
GI24	SAPA_G0832	MC_05-0601_111212_2.remap_scaffold36_orf00039	Putative exported protein	ICE	G_ICEHIN1056_000520	325	-	3842		1	1	1	1	1	1	1	0	0	0	0	0	0	0	0	0	0	0	0	0	0	0	0	0	0	0	0	0	0	0	0	0	0	0	0	0	0	0	0	0
GI24	SAPA_G0833	MC_05-0587_111212_2.remap_scaffold25_orf00041	Putative uncharacterized protein	ICE	-	132	-	3843		1	1	1	1	1	1	1	0	0	0	0	0	0	0	0	0	0	0	0	0	0	0	0	0	0	0	0	0	0	0	0	0	0	0	0	0	0	0	0	0
GI24	SAPA_G0834	MC_05-0582_111212_2.remap_scaffold26_orf00038	Putative exported protein	ICE	-	696	-	3844		1	1	1	1	1	1	1	0	0	0	0	0	0	0	0	0	0	0	0	0	0	0	0	0	0	0	0	0	0	0	0	0	0	0	0	0	0	0	0	0
GI24	SAPA_G0835	MC_05-0587_111212_2.remap_scaffold25_orf00038	Putative uncharacterized protein	ICE	-	129	-	3845		1	1	1	1	1	1	1	0	0	0	0	0	0	0	0	0	0	0	0	0	0	0	0	0	0	0	0	0	0	0	0	0	0	0	0	0	0	0	0	0
GI24	SAPA_G0836	MC_05-0582_111212_2.remap_scaffold26_orf00035	Putative TraC plasmid-related ATPase	ICE	virb4	902	-	3846		1	1	1	1	1	1	1	0	0	0	0	0	0	0	0	0	0	0	0	0	0	0	0	0	0	0	0	0	0	0	0	0	0	0	0	0	0	0	0	0
GI24	SAPA_G0837	MC_05-0632_batch3.remap_scaffold50_orf00025	Putative lipoprotein	ICE	G_ICEHIN1056_000440	135	-	3847		1	1	1	1	1	1	1	0	0	0	0	0	0	0	0	0	0	0	0	0	0	0	0	0	0	0	0	0	0	0	0	0	0	0	0	0	0	0	0	0
GI24	SAPA_G0838	MC_05-0601_111212_2.remap_scaffold36_orf00029	Putative bacterial conjugation TrbI-like protein	ICE	-	493	-	3848		1	1	1	1	1	1	1	0	0	0	0	0	0	0	0	0	0	0	0	0	0	0	0	0	0	0	0	0	0	0	0	0	0	0	0	0	0	0	0	0
GI24	SAPA_G0839	MC_05-0602_111212_2.remap_scaffold43_orf00028	Putative exported protein	ICE	-	307	-	3849		1	1	1	1	1	1	1	0	0	0	0	0	0	0	0	0	0	0	0	0	0	0	0	0	0	0	0	0	0	0	0	0	0	0	0	0	0	0	0	0
GI24	SAPA_G0840	MC_05-0601_111212_2.remap_scaffold36_orf00026	Putative uncharacterized protein	ICE	G_ICEHIN1056_000410	216	-	3850		1	1	1	1	1	1	1	0	0	0	0	0	0	0	0	0	0	0	0	0	0	0	0	0	0	0	0	0	0	0	0	0	0	0	0	0	0	0	0	0
GI24	SAPA_G0841	MC_05-0632_batch3.remap_scaffold50_orf00018	Putative uncharacterized protein	ICE	-	122	-	3851		1	1	1	1	1	1	1	0	0	0	0	0	0	0	0	0	0	0	0	0	0	0	0	0	0	0	0	0	0	0	0	0	0	0	0	0	0	0	0	0
GI24	SAPA_G0842	MC_05-0582_111212_2.remap_scaffold26_orf00025	Putative membrane protein	ICE	-	122	-	3852		1	1	1	1	1	1	1	0	0	0	0	0	0	0	0	0	0	0	0	0	0	0	0	0	0	0	0	0	0	0	0	0	0	0	0	0	0	0	0	0
GI24	SAPA_G0843	MC_05-0750_111212_3.remap_scaffold25_orf00023	Putative exported protein with RAQPRD domain	ICE	-	114	-	3853		1	1	1	1	1	1	1	0	0	0	0	0	0	0	0	0	0	0	0	0	0	0	0	0	0	0	0	0	0	0	0	0	0	0	0	0	0	0	0	0
GI24	SAPA_G0844	MC_05-0601_111212_2.remap_scaffold36_orf00018	Putative transmembrane protein	ICE	-	254	-	3854		1	1	1	1	1	1	1	0	0	0	0	0	0	0	0	0	0	0	0	0	0	0	0	0	0	0	0	0	0	0	0	0	0	0	0	0	0	0	0	0
GI24	SAPA_G0845	MC_05-0601_111212_2.remap_scaffold36_orf00017	Putative TraD plasmid transfer protein	ICE	t4cp	706	-	3855		1	1	1	1	1	1	1	0	0	0	0	0	0	0	0	0	0	0	0	0	0	0	0	0	0	0	0	0	0	0	0	0	0	0	0	0	0	0	0	0
GI24	SAPA_G0846	MC_05-0602_111212_2.remap_scaffold43_orf00016	Putative uncharacterized protein	ICE	-	250	-	3856		1	1	1	1	1	1	1	0	0	0	0	0	0	0	0	0	0	0	0	0	0	0	0	0	0	0	0	0	0	0	0	0	0	0	0	0	0	0	0	0
GI24	SAPA_G0847	MC_05-0602_111212_2.remap_scaffold43_orf00015	Putative uncharacterized protein	ICE	-	171	-	3857		1	1	1	1	1	1	1	0	0	0	0	0	0	0	0	0	0	0	0	0	0	0	0	0	0	0	0	0	0	0	0	0	0	0	0	0	0	0	0	0
GI24	SAPA_G0848	MC_05-0750_111212_3.remap_scaffold25_orf00015	Putative restriction endonuclease	ICE	-	197	-	3858		1	1	1	1	1	1	1	0	0	0	0	0	0	0	0	0	0	0	0	0	0	0	0	0	0	0	0	0	0	0	0	0	0	0	0	0	0	0	0	0
GI24	SAPA_G0849	MC_05-0750_111212_3.remap_scaffold25_orf00014	Putative uncharacterized protein	ICE	-	176	-	3859		1	1	1	1	1	1	1	0	0	0	0	0	0	0	0	0	0	0	0	0	0	0	0	0	0	0	0	0	0	0	0	0	0	0	0	0	0	0	0	0
GI24	SAPA_G0850	MC_06-0567_111212_3.remap_scaffold35_orf00013	Putative Lytic transglycosylase, catalytic	ICE	-	219	-	3860		1	1	1	1	1	1	1	0	0	0	0	0	0	0	0	0	0	0	0	0	0	0	0	0	0	0	0	0	0	0	0	0	0	0	0	0	0	0	0	0
GI24	SAPA_G0851	MC_05-0750_111212_3.remap_scaffold25_orf00011	Putative exported protein	ICE	-	240	-	3861		1	1	1	1	1	1	1	0	0	0	0	0	0	0	0	0	0	0	0	0	0	0	0	0	0	0	0	0	0	0	0	0	0	0	0	0	0	0	0	0
GI24	SAPA_G0852	MC_05-0582_111212_2.remap_scaffold26_orf00010	Putative uncharacterized protein	ICE	-	260	-	3862		1	1	1	1	1	1	1	0	0	0	0	0	0	0	0	0	0	0	0	0	0	0	0	0	0	0	0	0	0	0	0	0	0	0	0	0	0	0	0	0
GI24	SAPA_G0853	MC_05-0587_111212_2.remap_scaffold25_orf00011	Putative PilL protein	ICE	G_ICEHIN1056_000310	193	-	3863		1	1	1	1	1	1	1	0	0	0	0	0	0	0	0	0	0	0	0	0	0	0	0	0	0	0	0	0	0	0	0	0	0	0	0	0	0	0	0	0
GI24	SAPA_G0854	MC_06-0567_111212_3.remap_scaffold35_orf00008	Putative transposase, YhgA-like protein	ICE	-	83	-	3864		1	1	1	1	1	1	1	0	0	0	0	0	0	0	0	0	0	0	0	0	0	0	0	0	0	0	0	0	0	0	0	0	0	0	0	0	0	0	0	0
GI24	SAPA_G0855	MC_05-0750_111212_3.remap_scaffold25_orf00006	Putative transposase, YhgA-like protein	ICE	-	195	-	3865		1	1	1	1	1	1	1	0	0	0	0	0	0	0	0	0	0	0	0	0	0	0	0	0	0	0	0	0	0	0	0	0	0	0	0	0	0	0	0	0
GI24	SAPA_G0856	MC_06-0567_111212_3.remap_scaffold35_orf00003	Single-stranded DNA-binding protein	ICE	-	186	ssb	3866		1	1	1	1	1	1	1	0	0	0	0	0	0	0	0	0	0	0	0	0	0	0	0	0	0	0	0	0	0	0	0	0	0	0	0	0	0	0	0	0
GI24	SAPA_G0857	MC_06-0567_111212_3.remap_scaffold35_orf00001	Putative uncharacterized protein	ICE	-	155	-	3867		1	1	1	1	1	1	1	0	0	0	0	0	0	0	0	0	0	0	0	0	0	0	0	0	0	0	0	0	0	0	0	0	0	0	0	0	0	0	0	0
GI24	SAPA_G0858	MC_05-0632_batch3.remap_scaffold31_orf00001	DNA topoisomerase 3	ICE	-	673	-	3868		1	1	1	1	1	1	1	0	0	0	0	0	0	0	0	0	0	0	0	0	0	0	0	0	0	0	0	0	0	0	0	0	0	0	0	0	0	0	0	0
GI24	SAPA_G0859	MC_06-0567_111212_3.remap_C2461_orf00002	Putative uncharacterized protein	ICE	-	189	-	3869		1	1	1	1	1	1	1	0	0	0	0	0	0	0	0	0	0	0	0	0	0	0	0	0	0	0	0	0	0	0	0	0	0	0	0	0	0	0	0	0
GI24	SAPA_G0860	MC_06-0567_111212_3.remap_scaffold51_orf00001	Putative uncharacterized protein	ICE	-	422	-	3870		1	1	1	1	1	1	1	0	0	0	0	0	0	0	0	0	0	0	0	0	0	0	0	0	0	0	0	0	0	0	0	0	0	0	0	0	0	0	0	0
GI24	SAPA_G0861	MC_05-0582_111212_2.remap_scaffold49_orf00004	Putative uncharacterized protein	ICE	-	138	-	3871		1	1	1	1	1	1	1	0	0	0	0	0	0	0	0	0	0	0	0	0	0	0	0	0	0	0	0	0	0	0	0	0	0	0	0	0	0	0	0	0
GI24	SAPA_G0862	MC_05-0582_111212_2.remap_scaffold49_orf00007	Putative uncharacterized protein	ICE	-	133	-	3872		1	1	1	1	1	1	1	0	0	0	0	0	0	0	0	0	0	0	0	0	0	0	0	0	0	0	0	0	0	0	0	0	0	0	0	0	0	0	0	0
GI24	SAPA_G0863	MC_05-0632_batch3.remap_scaffold65_orf00127	Putative ea22-like protein	ICE	-	124	-	3873		1	1	1	1	1	1	1	0	0	0	0	0	0	0	0	0	0	0	0	0	0	0	0	0	0	0	0	0	0	0	0	0	0	0	0	0	0	0	0	0
GI24	SAPA_G0864	MC_06-0567_111212_3.remap_scaffold51_orf00010	Putative ea22-like protein	ICE	-	71	-	3874		1	1	1	1	1	1	1	0	0	0	0	0	0	0	0	0	0	0	0	0	0	0	0	0	0	0	0	0	0	0	0	0	0	0	0	0	0	0	0	0
GI24	SAPA_G0865	MC_05-0582_111212_2.remap_scaffold49_orf00012	YheA protein	ICE	-	59	-	3875		1	1	1	1	1	1	1	0	0	0	0	0	0	0	0	0	0	0	0	0	0	0	0	0	0	0	0	0	0	0	0	0	0	0	0	0	0	0	0	0
GI24	SAPA_G0866	MC_05-0601_111212_2.remap_scaffold48_orf00013	Putative uncharacterized protein	ICE	-	193	-	3876		1	1	1	1	1	1	1	0	0	0	0	0	0	0	0	0	0	0	0	0	0	0	0	0	0	0	0	0	0	0	0	0	0	0	0	0	0	0	0	0
GI24	SAPA_G0867	MC_05-0587_111212_2.remap_scaffold49_orf00014	Putative uncharacterized protein	ICE	-	244	-	3877		1	1	1	1	1	1	1	0	0	0	0	0	0	0	0	0	0	0	0	0	0	0	0	0	0	0	0	0	0	0	0	0	0	0	0	0	0	0	0	0
GI24	SAPA_G0868	MC_05-0601_111212_2.remap_scaffold48_orf00015	Putative uncharacterized protein	ICE	-	550	-	3878		1	1	1	1	1	1	1	0	0	0	0	0	0	0	0	0	0	0	0	0	0	0	0	0	0	0	0	0	0	0	0	0	0	0	0	0	0	0	0	0
GI24	SAPA_G0869	MC_05-0587_111212_2.remap_scaffold49_orf00016	Helicase, DnaB family	ICE	-	463	-	3879		1	1	1	1	1	1	1	0	0	0	0	0	0	0	0	0	0	0	0	0	0	0	0	0	0	0	0	0	0	0	0	0	0	0	0	0	0	0	0	0
GI24	SAPA_G0870	MC_05-0582_111212_2.remap_scaffold49_orf00017	Putative uncharacterized protein	ICE	-	159	-	3880		1	1	1	1	1	1	1	0	0	0	0	0	0	0	0	0	0	0	0	0	0	0	0	0	0	0	0	0	0	0	0	0	0	0	0	0	0	0	0	0
GI24	SAPA_G0871	MC_05-0601_111212_2.remap_scaffold48_orf00020	Chromosome partitioning protein homolog	ICE	-	293	-	3881		1	1	1	1	1	1	1	0	0	0	0	0	0	0	0	0	0	0	0	0	0	0	0	0	0	0	0	0	0	0	0	0	0	0	0	0	0	0	0	0
GI24	SAPA_G0872	WS1033.scaffold_scaffold3_orf00291	Integrase family protein	ICE	-	320	-	3882		0	0	0	0	0	0	0	0	0	0	0	0	0	0	0	0	0	0	0	0	0	0	0	0	0	0	0	0	0	0	0	0	0	0	0	0	0	0	0	0
GI24	SAPA_G0873	WS1033.scaffold_scaffold3_orf00292	Putative helicase/relaxase	ICE	MOBH	515	-	3883		0	0	0	0	0	0	0	0	0	0	0	0	0	0	0	0	0	0	0	0	0	0	0	0	0	0	0	0	0	0	0	0	0	0	0	0	0	0	0	0
GI24	SAPA_G0874	WS1033.scaffold_scaffold3_orf00294	Putative membrane protein	ICE	-	186	-	3884		0	0	0	0	0	0	0	0	0	0	0	0	0	0	0	0	0	0	0	0	0	0	0	0	0	0	0	0	0	0	0	0	0	0	0	0	0	0	0	0
GI24	SAPA_G0875	WS1033.scaffold_scaffold3_orf00295	Putative uncharacterized protein	ICE	-	291	-	3885		0	0	0	0	0	0	0	0	0	0	0	0	0	0	0	0	0	0	0	0	0	0	0	0	0	0	0	0	0	0	0	0	0	0	0	0	0	0	0	0
GI24	SAPA_G0876	WS1033.scaffold_scaffold3_orf00297	Conjugal transfer protein	ICE	-	401	-	3886		0	0	0	0	0	0	0	0	0	0	0	0	0	0	0	0	0	0	0	0	0	0	0	0	0	0	0	0	0	0	0	0	0	0	0	0	0	0	0	0
GI24	SAPA_G0877	WS1033.scaffold_scaffold3_orf00299	Lipoprotein	ICE	G_ICEHIN1056_000440	105	-	3887		0	0	0	0	0	0	0	0	0	0	0	0	0	0	0	0	0	0	0	0	0	0	0	0	0	0	0	0	0	0	0	0	0	0	0	0	0	0	0	0
GI24	SAPA_G0878	WS1033.scaffold_scaffold3_orf00301	Putative uncharacterized protein	ICE	-	220	-	3888		0	0	0	0	0	0	0	0	0	0	0	0	0	0	0	0	0	0	0	0	0	0	0	0	0	0	0	0	0	0	0	0	0	0	0	0	0	0	0	0
GI24	SAPA_G0879	WS1033.scaffold_scaffold3_orf00303	Upf89.0	ICE	-	73	-	3889		0	0	0	0	0	0	0	0	0	0	0	0	0	0	0	0	0	0	0	0	0	0	0	0	0	0	0	0	0	0	0	0	0	0	0	0	0	0	0	0
GI24	SAPA_G0880	WS1033.scaffold_scaffold3_orf00313	Methyl-accepting chemotaxis sensory transducer	ICE	-	547	-	3890		0	0	0	0	0	0	0	0	0	0	0	0	0	0	0	0	0	0	0	0	0	0	0	0	0	0	0	0	0	0	0	0	0	0	0	0	0	0	0	0
GI24	SAPA_G0881	WS1033.scaffold_scaffold3_orf00316	Conserved domain protein	ICE	-	223	-	3891		0	0	0	0	0	0	0	0	0	0	0	0	0	0	0	0	0	0	0	0	0	0	0	0	0	0	0	0	0	0	0	0	0	0	0	0	0	0	0	0
GI24	SAPA_G0882	WS1033.scaffold_scaffold3_orf00320	Putative uncharacterized protein	ICE	-	592	-	3892		0	0	0	0	0	0	0	0	0	0	0	0	0	0	0	0	0	0	0	0	0	0	0	0	0	0	0	0	0	0	0	0	0	0	0	0	0	0	0	0
GI24	SAPA_G0885	WS1033.scaffold_scaffold3_orf00325	Conserved uncharacterized protein	ICE	-	141	-	3895		0	0	0	0	0	0	0	0	0	0	0	0	0	0	0	0	0	0	0	0	0	0	0	0	0	0	0	0	0	0	0	0	0	0	0	0	0	0	0	0
GI24	SAPA_G0886	WS1033.scaffold_scaffold3_orf00326	Conserved uncharacterized protein	ICE	-	316	-	3896		0	0	0	0	0	0	0	0	0	0	0	0	0	0	0	0	0	0	0	0	0	0	0	0	0	0	0	0	0	0	0	0	0	0	0	0	0	0	0	0
GI24	SAPA_G0887	WS1033.scaffold_scaffold3_orf00327	Antirestriction protein	ICE	-	328	-	3897		0	0	0	0	0	0	0	0	0	0	0	0	0	0	0	0	0	0	0	0	0	0	0	0	0	0	0	0	0	0	0	0	0	0	0	0	0	0	0	0
GI24	SAPA_G0888	WS1033.scaffold_scaffold3_orf00332	Conserved uncharacterized protein	ICE	-	103	-	3898		0	0	0	0	0	0	0	0	0	0	0	0	0	0	0	0	0	0	0	0	0	0	0	0	0	0	0	0	0	0	0	0	0	0	0	0	0	0	0	0
GI24	SAPA_G0889	WS1033.scaffold_scaffold3_orf00333	Uncharacterized protein	ICE	-	120	-	3899		0	0	0	0	0	0	0	0	0	0	0	0	0	0	0	0	0	0	0	0	0	0	0	0	0	0	0	0	0	0	0	0	0	0	0	0	0	0	0	0
GI24	SAPA_G0890	WS1033.scaffold_scaffold3_orf00334	Putative uncharacterized protein	ICE	-	130	-	3900		0	0	0	0	0	0	0	0	0	0	0	0	0	0	0	0	0	0	0	0	0	0	0	0	0	0	0	0	0	0	0	0	0	0	0	0	0	0	0	0
GI24	SAPA_G0891	WS1033.scaffold_scaffold3_orf00335	Hypothetical protein	ICE	-	113	-	3901		0	0	0	0	0	0	0	0	0	0	0	0	0	0	0	0	0	0	0	0	0	0	0	0	0	0	0	0	0	0	0	0	0	0	0	0	0	0	0	0
GI24	SAPA_G0892	WS1033.scaffold_scaffold3_orf00337	Integrase	ICE	-	297	-	3902		0	0	0	0	0	0	0	0	0	0	0	0	0	0	0	0	0	0	0	0	0	0	0	0	0	0	0	0	0	0	0	0	0	0	0	0	0	0	0	0
GI24	SAPA_G0893	WS1033.scaffold_scaffold3_orf00341	Ion channel family	ICE	-	439	-	3903		0	0	0	0	0	0	0	0	0	0	0	0	0	0	0	0	0	0	0	0	0	0	0	0	0	0	0	0	0	0	0	0	0	0	0	0	0	0	0	0
GI24	SAPA_G0894	WS1033.scaffold_scaffold3_orf00342	Hypothetical protein	ICE	-	114	-	3904		0	0	0	0	0	0	0	0	0	0	0	0	0	0	0	0	0	0	0	0	0	0	0	0	0	0	0	0	0	0	0	0	0	0	0	0	0	0	0	0
GI24	SAPA_G0895	WS1033.scaffold_scaffold3_orf00347	Contact-dependent inhibitor A	ICE	-	3456	-	3905		0	0	0	0	0	0	0	0	0	0	0	0	0	0	0	0	0	0	0	0	0	0	0	0	0	0	0	0	0	0	0	0	0	0	0	0	0	0	0	0
GI24	SAPA_G0896	WS1033.scaffold_scaffold3_orf00350	Polypeptide-transport-associated domain protein	ICE	-	564	-	3906		0	0	0	0	0	0	0	0	0	0	0	0	0	0	0	0	0	0	0	0	0	0	0	0	0	0	0	0	0	0	0	0	0	0	0	0	0	0	0	0
GI24	SAPA_G0897	WS1033.scaffold_scaffold3_orf00352	Transcriptional regulator, LacI family	ICE	-	340	-	3907		0	0	0	0	0	0	0	0	0	0	0	0	0	0	0	0	0	0	0	0	0	0	0	0	0	0	0	0	0	0	0	0	0	0	0	0	0	0	0	0
GI24	SAPA_G0898	WS1033.scaffold_scaffold3_orf00353	Sucrose-6-phosphate hydrolase (Sucrase) (Invertase)	ICE	-	470	-	3908		0	0	0	0	0	0	0	0	0	0	0	0	0	0	0	0	0	0	0	0	0	0	0	0	0	0	0	0	0	0	0	0	0	0	0	0	0	0	0	0
GI24	SAPA_G0899	WS1033.scaffold_scaffold3_orf00354	Protein-N(Pi)-phosphohistidine--sugar phosphotransferase	ICE	-	457	-	3909		0	0	0	0	0	0	0	0	0	0	0	0	0	0	0	0	0	0	0	0	0	0	0	0	0	0	0	0	0	0	0	0	0	0	0	0	0	0	0	0
GI24	SAPA_G0900	WS1033.scaffold_scaffold3_orf00357	Porin LamB type	ICE	-	506	-	3910		0	0	0	0	0	0	0	0	0	0	0	0	0	0	0	0	0	0	0	0	0	0	0	0	0	0	0	0	0	0	0	0	0	0	0	0	0	0	0	0
GI24	SAPA_G0901	WS1033.scaffold_scaffold3_orf00359	PfkB domain protein	ICE	-	286	-	3911		0	0	0	0	0	0	0	0	0	0	0	0	0	0	0	0	0	0	0	0	0	0	0	0	0	0	0	0	0	0	0	0	0	0	0	0	0	0	0	0
GI24	SAPA_G0902	WS1033.scaffold_scaffold3_orf00361	Putative Restriction enzyme beta subunit	ICE	-	321	-	3912		0	0	0	0	0	0	0	0	0	0	0	0	0	0	0	0	0	0	0	0	0	0	0	0	0	0	0	0	0	0	0	0	0	0	0	0	0	0	0	0
GI24	SAPA_G0903	WS1033.scaffold_scaffold3_orf00363	Restriction enzyme alpha subunit	ICE	-	630	-	3913		0	0	0	0	0	0	0	0	0	0	0	0	0	0	0	0	0	0	0	0	0	0	0	0	0	0	0	0	0	0	0	0	0	0	0	0	0	0	0	0
GI24	SAPA_G0904	WS1033.scaffold_scaffold3_orf00365	Hypothetical protein	ICE	-	312	-	3914		0	0	0	0	0	0	0	0	0	0	0	0	0	0	0	0	0	0	0	0	0	0	0	0	0	0	0	0	0	0	0	0	0	0	0	0	0	0	0	0
GI24	SAPA_G0905	WS1033.scaffold_scaffold3_orf00367	Hypothetical protein	ICE	-	140	-	3915		0	0	0	0	0	0	0	0	0	0	0	0	0	0	0	0	0	0	0	0	0	0	0	0	0	0	0	0	0	0	0	0	0	0	0	0	0	0	0	0
GI24	SAPA_G0906	WS1033.scaffold_scaffold3_orf00369	Hypothetical protein	ICE	-	127	-	3916		0	0	0	0	0	0	0	0	0	0	0	0	0	0	0	0	0	0	0	0	0	0	0	0	0	0	0	0	0	0	0	0	0	0	0	0	0	0	0	0
GI24	SAPA_G0907	WS1033.scaffold_scaffold3_orf00372	Putative membrane protein	ICE	-	522	-	3917		0	0	0	0	0	0	0	0	0	0	0	0	0	0	0	0	0	0	0	0	0	0	0	0	0	0	0	0	0	0	0	0	0	0	0	0	0	0	0	0
GI24	SAPA_G0908	WS1033.scaffold_scaffold3_orf00373	Putative uncharacterized protein	ICE	-	123	-	3918		0	0	0	0	0	0	0	0	0	0	0	0	0	0	0	0	0	0	0	0	0	0	0	0	0	0	0	0	0	0	0	0	0	0	0	0	0	0	0	0
GI24	SAPA_G0909	WS1033.scaffold_scaffold3_orf00376	Putative exported protein	ICE	G_ICEHIN1056_000510	475	-	3919		0	0	0	0	0	0	0	0	0	0	0	0	0	0	0	0	0	0	0	0	0	0	0	0	0	0	0	0	0	0	0	0	0	0	0	0	0	0	0	0
GI24	SAPA_G0910	WS1033.scaffold_scaffold3_orf00377	integrating conjugative element protein	ICE	G_ICEHIN1056_000520	324	-	3920		0	0	0	0	0	0	0	0	0	0	0	0	0	0	0	0	0	0	0	0	0	0	0	0	0	0	0	0	0	0	0	0	0	0	0	0	0	0	0	0
GI24	SAPA_G0911	WS1033.scaffold_scaffold3_orf00378	Uncharacterized conserved protein	ICE	-	134	-	3921		0	0	0	0	0	0	0	0	0	0	0	0	0	0	0	0	0	0	0	0	0	0	0	0	0	0	0	0	0	0	0	0	0	0	0	0	0	0	0	0
GI24	SAPA_G0912	WS1033.scaffold_scaffold3_orf00385	Conserved uncharacterized protein	ICE	-	796	-	3922		0	0	0	0	0	0	0	0	0	0	0	0	0	0	0	0	0	0	0	0	0	0	0	0	0	0	0	0	0	0	0	0	0	0	0	0	0	0	0	0
GI24	SAPA_G0913	WS1033.scaffold_scaffold3_orf00387	PerC family transcriptional regulator	ICE	-	71	-	3923		0	0	0	0	0	0	0	0	0	0	0	0	0	0	0	0	0	0	0	0	0	0	0	0	0	0	0	0	0	0	0	0	0	0	0	0	0	0	0	0
GI24	SAPA_G0914	WS1033.scaffold_scaffold3_orf00392	Conserved uncharacterized protein	ICE	-	135	-	3924		0	0	0	0	0	0	0	0	0	0	0	0	0	0	0	0	0	0	0	0	0	0	0	0	0	0	0	0	0	0	0	0	0	0	0	0	0	0	0	0
GI24	SAPA_G0915	WS1033.scaffold_scaffold3_orf00394	Putative plasmid-like protein	ICE	virb4	944	-	3925		0	0	0	0	0	0	0	0	0	0	0	0	0	0	0	0	0	0	0	0	0	0	0	0	0	0	0	0	0	0	0	0	0	0	0	0	0	0	0	0
GI24	SAPA_G0916	WS1033.scaffold_scaffold3_orf00395	Putative lipoprotein	ICE	G_ICEHIN1056_000440	135	-	3926		0	0	0	0	0	0	0	0	0	0	0	0	0	0	0	0	0	0	0	0	0	0	0	0	0	0	0	0	0	0	0	0	0	0	0	0	0	0	0	0
GI24	SAPA_G0917	WS1033.scaffold_scaffold3_orf00397	Putative secreted protein	ICE	-	512	-	3927		0	0	0	0	0	0	0	0	0	0	0	0	0	0	0	0	0	0	0	0	0	0	0	0	0	0	0	0	0	0	0	0	0	0	0	0	0	0	0	0
GI24	SAPA_G0918	WS1033.scaffold_scaffold3_orf00398	Putative exported protein	ICE	-	293	-	3928		0	0	0	0	0	0	0	0	0	0	0	0	0	0	0	0	0	0	0	0	0	0	0	0	0	0	0	0	0	0	0	0	0	0	0	0	0	0	0	0
GI24	SAPA_G0919	WS1033.scaffold_scaffold3_orf00400	Putative exported protein	ICE	G_ICEHIN1056_000410	220	-	3929		0	0	0	0	0	0	0	0	0	0	0	0	0	0	0	0	0	0	0	0	0	0	0	0	0	0	0	0	0	0	0	0	0	0	0	0	0	0	0	0
GI24	SAPA_G0920	WS1033.scaffold_scaffold3_orf00402	Putative transmembrane protein	ICE	-	125	-	3930		0	0	0	0	0	0	0	0	0	0	0	0	0	0	0	0	0	0	0	0	0	0	0	0	0	0	0	0	0	0	0	0	0	0	0	0	0	0	0	0
GI24	SAPA_G0921	WS1033.scaffold_scaffold3_orf00403	Putative exported protein	ICE	-	125	-	3931		0	0	0	0	0	0	0	0	0	0	0	0	0	0	0	0	0	0	0	0	0	0	0	0	0	0	0	0	0	0	0	0	0	0	0	0	0	0	0	0
GI24	SAPA_G0922	WS1033.scaffold_scaffold3_orf00406	integrative conjugative element protein, RAQPRD family	ICE	-	105	-	3932		0	0	0	0	0	0	0	0	0	0	0	0	0	0	0	0	0	0	0	0	0	0	0	0	0	0	0	0	0	0	0	0	0	0	0	0	0	0	0	0
GI24	SAPA_G0923	WS1033.scaffold_scaffold3_orf00407	Putative uncharacterized protein	ICE	-	198	-	3933		0	0	0	0	0	0	0	0	0	0	0	0	0	0	0	0	0	0	0	0	0	0	0	0	0	0	0	0	0	0	0	0	0	0	0	0	0	0	0	0
GI24	SAPA_G0924	WS1033.scaffold_scaffold3_orf00409	Similar to transcriptional regulator	ICE	-	371	-	3934		0	0	0	0	0	0	0	0	0	0	0	0	0	0	0	0	0	0	0	0	0	0	0	0	0	0	0	0	0	0	0	0	0	0	0	0	0	0	0	0
GI24	SAPA_G0925	WS1033.scaffold_scaffold3_orf00411	Putative inner membrane protein	ICE	-	253	-	3935		0	0	0	0	0	0	0	0	0	0	0	0	0	0	0	0	0	0	0	0	0	0	0	0	0	0	0	0	0	0	0	0	0	0	0	0	0	0	0	0
GI24	SAPA_G0926	WS1033.scaffold_scaffold3_orf00414	Putative plasmid transfer protein	ICE	t4cp	707	-	3936		0	0	0	0	0	0	0	0	0	0	0	0	0	0	0	0	0	0	0	0	0	0	0	0	0	0	0	0	0	0	0	0	0	0	0	0	0	0	0	0
GI24	SAPA_G0927	WS1033.scaffold_scaffold3_orf00415	Putative uncharacterized protein	ICE	-	255	-	3937		0	0	0	0	0	0	0	0	0	0	0	0	0	0	0	0	0	0	0	0	0	0	0	0	0	0	0	0	0	0	0	0	0	0	0	0	0	0	0	0
GI24	SAPA_G0928	WS1033.scaffold_scaffold3_orf00416	Putative uncharacterized protein	ICE	-	125	-	3938		0	0	0	0	0	0	0	0	0	0	0	0	0	0	0	0	0	0	0	0	0	0	0	0	0	0	0	0	0	0	0	0	0	0	0	0	0	0	0	0
GI24	SAPA_G0929	WS1033.scaffold_scaffold3_orf00417	Restriction endonuclease	ICE	-	222	-	3939		0	0	0	0	0	0	0	0	0	0	0	0	0	0	0	0	0	0	0	0	0	0	0	0	0	0	0	0	0	0	0	0	0	0	0	0	0	0	0	0
GI24	SAPA_G0930	WS1033.scaffold_scaffold3_orf00419	Putative uncharacterized protein	ICE	-	171	-	3940		0	0	0	0	0	0	0	0	0	0	0	0	0	0	0	0	0	0	0	0	0	0	0	0	0	0	0	0	0	0	0	0	0	0	0	0	0	0	0	0
GI24	SAPA_G0931	WS1033.scaffold_scaffold3_orf00420	Lytic transglycosylase catalytic	ICE	-	203	-	3941		0	0	0	0	0	0	0	0	0	0	0	0	0	0	0	0	0	0	0	0	0	0	0	0	0	0	0	0	0	0	0	0	0	0	0	0	0	0	0	0
GI24	SAPA_G0932	WS1033.scaffold_scaffold3_orf00421	Putative exported protein	ICE	-	242	-	3942		0	0	0	0	0	0	0	0	0	0	0	0	0	0	0	0	0	0	0	0	0	0	0	0	0	0	0	0	0	0	0	0	0	0	0	0	0	0	0	0
GI24	SAPA_G0933	WS1033.scaffold_scaffold3_orf00423	Putative uncharacterized protein	ICE	-	295	-	3943		0	0	0	0	0	0	0	0	0	0	0	0	0	0	0	0	0	0	0	0	0	0	0	0	0	0	0	0	0	0	0	0	0	0	0	0	0	0	0	0
GI24	SAPA_G0934	WS1033.scaffold_scaffold3_orf00424	Integrase family protein	ICE	-	372	-	3944		0	0	0	0	0	0	0	0	0	0	0	0	0	0	0	0	0	0	0	0	0	0	0	0	0	0	0	0	0	0	0	0	0	0	0	0	0	0	0	0
GI24	SAPA_G0935	WS1033.scaffold_C3476_orf00010	Type IV prepilin peptidase	ICE	-	217	-	3945		0	0	0	0	0	0	0	0	0	0	0	0	0	0	0	0	0	0	0	0	0	0	0	0	0	0	0	0	0	0	0	0	0	0	0	0	0	0	0	0
GI24	SAPA_G0936	WS1033.scaffold_C3476_orf00008	transglycosylase SLT domain-containing protein	ICE	-	159	-	3946		0	0	0	0	0	0	0	0	0	0	0	0	0	0	0	0	0	0	0	0	0	0	0	0	0	0	0	0	0	0	0	0	0	0	0	0	0	0	0	0
GI24	SAPA_G0937	WS1033.scaffold_C3476_orf00007	putative conjugative transfer outer membrane protein PilS	ICE	-	199	-	3947		0	0	0	0	0	0	0	0	0	0	0	0	0	0	0	0	0	0	0	0	0	0	0	0	0	0	0	0	0	0	0	0	0	0	0	0	0	0	0	0
GI24	SAPA_G0938	WS1033.scaffold_C3476_orf00006	Type IV pilus biogenesis protein PilR	ICE	-	360	-	3948		0	0	0	0	0	0	0	0	0	0	0	0	0	0	0	0	0	0	0	0	0	0	0	0	0	0	0	0	0	0	0	0	0	0	0	0	0	0	0	0
GI24	SAPA_G0939	WS1033.scaffold_C3476_orf00004	Type IV secretion system protein	ICE	-	514	-	3949		0	0	0	0	0	0	0	0	0	0	0	0	0	0	0	0	0	0	0	0	0	0	0	0	0	0	0	0	0	0	0	0	0	0	0	0	0	0	0	0
GI24	SAPA_G0940	WS1033.scaffold_C3476_orf00002	Type IV pilus biogenesis protein PilP	ICE	-	185	pilP1	3950		0	0	0	0	0	0	0	0	0	0	0	0	0	0	0	0	0	0	0	0	0	0	0	0	0	0	0	0	0	0	0	0	0	0	0	0	0	0	0	0
GI24	SAPA_G0941	WS1033.scaffold_C3476_orf00001	Pilin accessory protein PilO	ICE	-	194	-	3951		0	0	0	0	0	0	0	0	0	0	0	0	0	0	0	0	0	0	0	0	0	0	0	0	0	0	0	0	0	0	0	0	0	0	0	0	0	0	0	0
GI24	SAPA_G0942	WS1033.scaffold_scaffold48_orf00002	Type IV pilus formation outer membrane protein	ICE	-	533	-	3952		0	0	0	0	0	0	0	0	0	0	0	0	0	0	0	0	0	0	0	0	0	0	0	0	0	0	0	0	0	0	0	0	0	0	0	0	0	0	0	0
GI24	SAPA_G0943	WS1033.scaffold_scaffold48_orf00004	PilM protein	ICE	-	148	PilM	3953		0	0	0	0	0	0	0	0	0	0	0	0	0	0	0	0	0	0	0	0	0	0	0	0	0	0	0	0	0	0	0	0	0	0	0	0	0	0	0	0
GI24	SAPA_G0944	WS1033.scaffold_scaffold48_orf00008	Putative uncharacterized protein	ICE	G_ICEHIN1056_000310	438	-	3954		0	0	0	0	0	0	0	0	0	0	0	0	0	0	0	0	0	0	0	0	0	0	0	0	0	0	0	0	0	0	0	0	0	0	0	0	0	0	0	0
GI24	SAPA_G0945	WS1033.scaffold_scaffold48_orf00010	Putative cytoplasmic protein	ICE	-	70	-	3955		0	0	0	0	0	0	0	0	0	0	0	0	0	0	0	0	0	0	0	0	0	0	0	0	0	0	0	0	0	0	0	0	0	0	0	0	0	0	0	0
GI24	SAPA_G0946	WS1033.scaffold_scaffold48_orf00014	Uncharacterized conserved protein	ICE	-	144	-	3956		0	0	0	0	0	0	0	0	0	0	0	0	0	0	0	0	0	0	0	0	0	0	0	0	0	0	0	0	0	0	0	0	0	0	0	0	0	0	0	0
GI24	SAPA_G0947	WS1033.scaffold_scaffold48_orf00018	Conserved uncharacterized protein	ICE	-	166	-	3957		0	0	0	0	0	0	0	0	0	0	0	0	0	0	0	0	0	0	0	0	0	0	0	0	0	0	0	0	0	0	0	0	0	0	0	0	0	0	0	0
GI24	SAPA_G0948	WS1033.scaffold_scaffold48_orf00019	Similar to DNA topoisomerase III	ICE	-	672	-	3958		0	0	0	0	0	0	0	0	0	0	0	0	0	0	0	0	0	0	0	0	0	0	0	0	0	0	0	0	0	0	0	0	0	0	0	0	0	0	0	0
GI24	SAPA_G0949	WS1033.scaffold_scaffold48_orf00020	Putative uncharacterized protein	ICE	-	243	-	3959		0	0	0	0	0	0	0	0	0	0	0	0	0	0	0	0	0	0	0	0	0	0	0	0	0	0	0	0	0	0	0	0	0	0	0	0	0	0	0	0
GI24	SAPA_G0950	WS1033.scaffold_scaffold48_orf00022	Uncharacterized conserved protein	ICE	-	408	-	3960		0	0	0	0	0	0	0	0	0	0	0	0	0	0	0	0	0	0	0	0	0	0	0	0	0	0	0	0	0	0	0	0	0	0	0	0	0	0	0	0
GI24	SAPA_G0951	WS1033.scaffold_scaffold48_orf00025	Putative uncharacterized protein	ICE	-	200	-	3961		0	0	0	0	0	0	0	0	0	0	0	0	0	0	0	0	0	0	0	0	0	0	0	0	0	0	0	0	0	0	0	0	0	0	0	0	0	0	0	0
GI24	SAPA_G0952	WS1033.scaffold_scaffold48_orf00027	Putative uncharacterized protein	ICE	-	249	-	3962		0	0	0	0	0	0	0	0	0	0	0	0	0	0	0	0	0	0	0	0	0	0	0	0	0	0	0	0	0	0	0	0	0	0	0	0	0	0	0	0
GI24	SAPA_G0953	WS1033.scaffold_scaffold48_orf00030	Putative ATP/GTP binding protein	ICE	-	573	-	3963		0	0	0	0	0	0	0	0	0	0	0	0	0	0	0	0	0	0	0	0	0	0	0	0	0	0	0	0	0	0	0	0	0	0	0	0	0	0	0	0
GI24	SAPA_G0954	WS1033.scaffold_scaffold48_orf00031	Putative DNA binding protein with DNA-dependent ATPase activity	ICE	-	451	dnaB2	3964		0	0	0	0	0	0	0	0	0	0	0	0	0	0	0	0	0	0	0	0	0	0	0	0	0	0	0	0	0	0	0	0	0	0	0	0	0	0	0	0
GI24	SAPA_G0955	WS1033.scaffold_scaffold48_orf00033	Putative ATPase	ICE	-	326	-	3965		0	0	0	0	0	0	0	0	0	0	0	0	0	0	0	0	0	0	0	0	0	0	0	0	0	0	0	0	0	0	0	0	0	0	0	0	0	0	0	0
GI25	SAPA_G0956	SeAg_B2779	phage protein	Phage	-	567	-	4079		0	0	0	0	0	0	0	0	0	0	0	0	0	0	1	1	1	0	0	1	1	1	1	1	1	1	1	1	1	1	1	1	1	0	1	1	1	1	1	1
GI25	SAPA_G0957	SeAg_B2780	phage protein	Phage	-	181	-	4080		0	0	0	0	0	0	0	0	0	0	0	0	0	0	1	1	1	0	0	1	1	1	1	1	1	1	1	1	1	1	1	1	1	0	1	1	1	1	1	1
GI25	SAPA_G0958	SeAg_B2781	hypothetical protein	Phage	-	241	-	4081		0	0	0	0	0	0	0	0	0	0	0	0	0	0	1	1	1	0	0	1	1	1	1	1	1	1	1	1	1	1	1	1	1	0	1	1	1	1	1	1
GI25	SAPA_G0959	SeAg_B2782	putative phage tail fiber assembly protein	Phage	-	176	-	4082		0	0	0	0	0	0	0	0	0	0	0	0	0	0	1	1	1	0	0	1	1	1	1	1	1	1	1	1	1	1	1	1	1	0	1	1	1	1	1	1
GI25	SAPA_G0960	SeAg_B2850	tail fiber domain protein	Phage	-	588	-	4083		0	0	0	0	0	0	0	0	0	0	0	0	0	0	1	1	1	0	0	1	1	1	1	1	1	1	1	1	1	1	1	1	1	0	1	1	1	1	1	1
GI25	SAPA_G0961	SeAg_B2784	phage protein	Phage	-	195	-	4084		0	0	0	0	0	0	0	0	0	0	0	0	0	0	1	1	1	0	0	1	1	1	1	1	1	1	1	1	1	1	1	1	1	0	1	1	1	1	1	1
GI25	SAPA_G0962	SeAg_B2785	phage protein	Phage	-	394	-	4085		0	0	0	0	0	0	0	0	0	0	0	0	0	0	1	1	1	0	0	1	1	1	1	1	1	1	1	1	1	1	1	1	1	0	1	1	1	1	1	1
GI25	SAPA_G0963	SeAg_B2786	phage protein	Phage	-	109	-	4086		0	0	0	0	0	0	0	0	0	0	0	0	0	0	1	1	1	0	0	1	1	1	1	1	1	1	1	1	1	1	1	1	1	0	1	1	1	1	1	1
GI25	SAPA_G0964	SeAg_B2787	phage tail tape measure protein, TP901 family, core region	Phage	-	655	-	4087		0	0	0	0	0	0	0	0	0	0	0	0	0	0	1	1	1	0	0	1	1	1	1	1	1	1	1	1	1	1	1	1	1	0	1	1	1	1	1	1
GI25	SAPA_G0965	SF_R0102_09.scaffold_C2751_orf00039	Phage protein	Phage	-	86	-	4088		0	0	0	0	0	0	0	0	0	0	0	0	0	0	0	0	0	0	0	0	0	1	0	0	0	0	0	0	0	0	0	0	0	0	0	0	0	0	0	0
GI25	SAPA_G0966	SeAg_B2789	hypothetical phage-related protein	Phage	-	110	-	4089		0	0	0	0	0	0	0	0	0	0	0	0	0	0	1	1	1	0	0	1	1	1	1	1	1	1	1	1	1	1	1	1	1	0	1	1	1	1	1	1
GI25	SAPA_G0967	SeAg_B2790	hypothetical phage-related protein	Phage	-	113	-	4090		0	0	0	0	0	0	0	0	0	0	0	0	0	0	1	1	1	0	0	1	1	1	1	1	1	1	1	1	1	1	1	1	1	0	1	1	1	1	1	1
GI25	SAPA_G0968	MC_08-0771.scaffold_C2654_orf00035	Phage holin family 2	Phage	-	98	-	4091		0	0	0	0	0	0	0	0	0	0	0	0	0	0	0	0	0	0	0	0	0	1	0	0	0	0	0	0	0	0	0	0	0	0	0	0	0	0	0	0
GI25	SAPA_G0969	SeAg_B2792	phage protein	Phage	-	151	-	4092		0	0	0	0	0	0	0	0	0	0	0	0	0	0	1	1	1	0	0	1	1	1	1	1	1	1	1	1	1	1	1	1	1	0	1	1	1	1	1	1
GI25	SAPA_G0970	SeAg_B2793	tail sheath	Phage	-	375	-	4093		0	0	0	0	0	0	0	0	0	0	0	0	0	0	1	1	1	0	0	1	1	1	1	1	1	1	1	1	1	1	1	1	1	0	1	1	1	1	1	1
GI25	SAPA_G0971	SF_R0571_09.scaffold_C3049_orf00029	Putative phage protein	Phage	-	236	-	4094		0	0	0	0	0	0	0	0	0	0	0	0	0	0	0	0	0	0	0	0	0	1	0	0	0	0	0	0	0	0	0	0	0	0	0	0	0	0	0	0
GI25	SAPA_G0972	SF_R0571_09.scaffold_C3049_orf00030	Putative phage protein	Phage	-	169	-	4095		0	0	0	0	0	0	0	0	0	0	0	0	0	0	0	0	0	0	0	0	0	1	0	0	0	0	0	0	0	0	0	0	0	0	0	0	0	0	0	0
GI25	SAPA_G0973	MC_08-0771.scaffold_C2654_orf00029	Phage head completion protein	Phage	-	168	-	4096		0	0	0	0	0	0	0	0	0	0	0	0	0	0	0	0	0	0	0	0	0	1	0	0	0	0	0	0	0	0	0	0	0	0	0	0	0	0	0	0
GI25	SAPA_G0974	MC_08-0771.scaffold_C2654_orf00028	Phage terminase subunit	Phage	-	234	-	4097		0	0	0	0	0	0	0	0	0	0	0	0	0	0	0	0	0	0	0	0	0	1	0	0	0	0	0	0	0	0	0	0	0	0	0	0	0	0	0	0
GI25	SAPA_G0975	MC_09-0426.scaffold_scaffold13_orf00216	Phage major capsid protein, P2 family	Phage	-	341	-	4098		0	0	0	0	0	0	0	0	0	0	0	0	0	0	0	0	0	0	0	0	0	1	0	0	0	0	0	0	0	0	0	0	0	0	0	0	0	0	0	0
GI25	SAPA_G0976	MC_09-0426.scaffold_scaffold13_orf00215	Phage capsid scaffolding	Phage	-	268	-	4099		0	0	0	0	0	0	0	0	0	0	0	0	0	0	0	0	0	0	0	0	0	1	0	0	0	0	0	0	0	0	0	0	0	0	0	0	0	0	0	0
GI25	SAPA_G0977	MC_08-0771.scaffold_C2654_orf00024	Putative Terminase, ATPase subunit from bacteriophage origin	Phage	-	592	-	4100		0	0	0	0	0	0	0	0	0	0	0	0	0	0	0	0	0	0	0	0	0	1	0	0	0	0	0	0	0	0	0	0	0	0	0	0	0	0	0	0
GI25	SAPA_G0978	MC_09-0426.scaffold_scaffold13_orf00211	Phage portal protein, pbsx family	Phage	-	354	-	4101		0	0	0	0	0	0	0	0	0	0	0	0	0	0	0	0	0	0	0	0	0	1	0	0	0	0	0	0	0	0	0	0	0	0	0	0	0	0	0	0
GI25	SAPA_G0979	SF_R0102_09.scaffold_C2751_orf00020	Bacteriophage transcription regulator protein	Phage	-	90	-	4102		0	0	0	0	0	0	0	0	0	0	0	0	0	0	0	0	0	0	0	0	0	1	0	0	0	0	0	0	0	0	0	0	0	0	0	0	0	0	0	0
GI25	SAPA_G0980	MC_09-0426.scaffold_scaffold13_orf00208	Replication gene A protein	Phage	-	674	-	4103		0	0	0	0	0	0	0	0	0	0	0	0	0	0	0	0	0	0	0	0	0	1	0	0	0	0	0	0	0	0	0	0	0	0	0	0	0	0	0	0
GI25	SAPA_G0981	SF_R0571_09.scaffold_C3049_orf00044	Gp51 family protein	Phage	-	338	-	4104		0	0	0	0	0	0	0	0	0	0	0	0	0	0	0	0	0	0	0	0	0	0	0	0	0	0	0	0	0	0	0	0	0	0	0	0	0	0	0	0
GI25	SAPA_G0982	SF_R0102_09.scaffold_C2751_orf00015	Site-specific DNA-methyltransferase (Adenine-specific) from bacteriophage origin	Phage	-	274	-	4105		0	0	0	0	0	0	0	0	0	0	0	0	0	0	0	0	0	0	0	0	0	1	0	0	0	0	0	0	0	0	0	0	0	0	0	0	0	0	0	0
GI25	SAPA_G0983	DBS_20042479_111212_1.remap_scaffold9_orf00023	Gp91	Phage	-	110	-	4106		0	0	0	0	0	0	0	0	0	0	0	0	0	0	0	0	0	0	0	0	0	1	0	0	0	0	0	0	0	0	0	0	0	0	0	0	0	0	0	0
GI25	SAPA_G0984	DBS_20042479_111212_1.remap_scaffold9_orf00024	Eaa protein	Phage	-	136	eaa	4107		0	0	0	0	0	0	0	0	0	0	0	0	0	0	0	0	0	0	0	0	0	1	0	0	0	0	0	0	0	0	0	0	0	0	0	0	0	0	0	0
GI25	SAPA_G0985	SF_R0571_09.scaffold_C3049_orf00049	Putative uncharacterized protein	Phage	-	134	-	4108		0	0	0	0	0	0	0	0	0	0	0	0	0	0	0	0	0	0	0	0	0	1	0	0	0	0	0	0	0	0	0	0	0	0	0	0	0	0	0	0
GI25	SAPA_G0986	DBS_20042479_111212_1.remap_scaffold9_orf00027	Putative uncharacterized protein	Phage	-	142	-	4109		0	0	0	0	0	0	0	0	0	0	0	0	0	0	0	0	0	0	0	0	0	1	0	0	0	0	0	0	0	0	0	0	0	0	0	0	0	0	0	0
GI25	SAPA_G0987	MC_09-0426.scaffold_scaffold13_orf00197	Fels-2 prophage protein	Phage	-	154	-	4110		0	0	0	0	0	0	0	0	0	0	0	0	0	0	0	0	0	0	0	0	0	0	0	0	0	0	0	0	0	0	0	0	0	0	0	0	0	0	0	0
GI25	SAPA_G0988	MC_09-0426.scaffold_scaffold13_orf00196	Regulatory protein CII bacteriophage 186	Phage	-	168	-	4111		0	0	0	0	0	0	0	0	0	0	0	0	0	0	0	0	0	0	0	0	0	1	0	0	0	0	0	0	0	0	0	0	0	0	0	0	0	0	0	0
GI25	SAPA_G0989	SF_R0571_09.scaffold_C3049_orf00054	Regulator bacteriophage origin	Phage	-	74	-	4112		0	0	0	0	0	0	0	0	0	0	0	0	0	0	0	0	0	0	0	0	0	1	0	0	0	0	0	0	0	0	0	0	0	0	0	0	0	0	0	0
GI25	SAPA_G0990	MC_09-0426.scaffold_scaffold13_orf00194	Putative uncharacterized protein	Phage	-	163	-	4113		0	0	0	0	0	0	0	0	0	0	0	0	0	0	0	0	0	0	0	0	0	0	0	0	0	0	0	0	0	0	0	0	0	0	0	0	0	0	0	0
GI25	SAPA_G0991	SF_R0571_09.scaffold_C3049_orf00055	Repressor protein	Phage	-	90	-	4114		0	0	0	0	0	0	0	0	0	0	0	0	0	0	0	0	0	0	0	0	0	1	0	0	0	0	0	0	0	0	0	0	0	0	0	0	0	0	0	0
GI25	SAPA_G0992	SF_R0571_09.scaffold_C3049_orf00057	Phage protein	Phage	-	189	-	4115		0	0	0	0	0	0	0	0	0	0	0	0	0	0	0	0	0	0	0	0	0	1	0	0	0	0	0	0	0	0	0	0	0	0	0	0	0	0	0	0
GI25	SAPA_G0993	SF_R0571_09.scaffold_C3049_orf00058	Phage integrase family protein	Phage	-	346	-	4116		0	0	0	0	0	0	0	0	0	0	0	0	0	0	0	0	0	0	0	0	0	1	0	0	0	0	0	0	0	0	0	0	0	0	0	0	0	0	0	0
GI25	SAPA_G0994	SF_R0102_09.scaffold_C2751_orf00001	KAP family P-loop domain protein	Phage	-	594	-	4117		0	0	0	0	0	0	0	0	0	0	0	0	0	0	0	0	0	0	0	0	0	0	0	0	0	0	0	0	0	0	0	0	0	0	0	0	0	0	0	0
GI25	SAPA_G0995	DBS_20001356.scaffold_C2869_orf00053	Late control gene D protein	Phage	-	390	-	4118		0	0	0	0	0	0	0	0	0	0	0	0	0	0	0	0	0	0	0	0	0	0	0	0	0	0	0	0	0	0	0	0	0	0	0	0	0	0	0	0
GI25	SAPA_G0996	DBS_20001356.scaffold_C2869_orf00052	Phage tail protein	Phage	-	162	-	4119		0	0	0	0	0	0	0	0	0	0	0	0	0	0	0	0	0	0	0	0	0	0	0	0	0	0	0	0	0	0	0	0	0	0	0	0	0	0	0	0
GI25	SAPA_G0997	DBS_20090461.scaffold_C2888_orf00051	G protein	Phage	-	815	-	4120		0	0	0	0	0	0	0	0	0	0	0	0	0	0	0	0	0	0	0	0	0	0	0	0	0	0	0	0	0	0	0	0	0	0	0	0	0	0	0	0
GI25	SAPA_G0998	WS0301.scaffold_scaffold3_orf00037	Phage tail protein, P2 GpE family protein	Phage	-	46	-	4121		0	0	0	0	0	0	0	0	0	0	0	0	0	0	1	0	0	0	0	0	1	0	0	0	0	0	0	0	0	0	0	0	0	0	1	0	0	0	0	0
GI25	SAPA_G0999	DBS_20090461.scaffold_C2888_orf00048	Tail protein	Phage	-	112	-	4122		0	0	0	0	0	0	0	0	0	0	0	0	0	0	0	0	0	0	0	0	0	0	0	0	0	0	0	0	0	0	0	0	0	0	0	0	0	0	0	0
GI25	SAPA_G1000	DBS_20090461.scaffold_C2888_orf00047	Tail tube protein FII	Phage	-	173	-	4123		0	0	0	0	0	0	0	0	0	0	0	0	0	0	0	0	0	0	0	0	0	0	0	0	0	0	0	0	0	0	0	0	0	0	0	0	0	0	0	0
GI25	SAPA_G1001	DBS_20001356.scaffold_C2869_orf00044	Phage tail sheath protein	Phage	-	393	-	4124		0	0	0	0	0	0	0	0	0	0	0	0	0	0	1	0	0	0	0	0	1	0	0	0	0	0	0	0	0	0	0	0	0	0	1	0	0	0	0	0
GI25	SAPA_G1002	DBS_20090461.scaffold_C2888_orf00045	Tail fiber assembly protein	Phage	-	190	-	4125		0	0	0	0	0	0	0	0	0	0	0	0	0	0	0	0	0	0	0	0	0	0	0	0	0	0	0	0	0	0	0	0	0	0	0	0	0	0	0	0
GI25	SAPA_G1003	DBS_20090461.scaffold_C2888_orf00044	Gp19	Phage	-	581	-	4126		0	0	0	0	0	0	0	0	0	0	0	0	0	0	0	0	0	0	0	0	0	0	0	0	0	0	0	0	0	0	0	0	0	0	0	0	0	0	0	0
GI25	SAPA_G1004	t4304	putative phage tail fiber protein	Phage	-	135	-	4127		0	0	0	0	0	0	0	0	0	0	0	0	0	0	0	0	0	0	0	0	0	0	0	0	0	0	0	0	0	0	0	0	0	0	1	0	0	0	0	0
GI25	SAPA_G1005	DBS_20001356.scaffold_C2869_orf00042	Phage tail fiber repeat-containing protein	Phage	-	705	-	4128		0	0	0	0	0	0	0	0	0	0	0	0	0	0	0	0	0	0	0	0	0	0	0	0	0	0	0	0	0	0	0	0	0	0	0	0	0	0	0	0
GI25	SAPA_G1006	DBS_20001356.scaffold_C2869_orf00040	Phage tail protein I	Phage	-	177	-	4129		0	0	0	0	0	0	0	0	0	0	0	0	0	0	0	0	0	0	0	0	0	0	0	0	0	0	0	0	0	0	0	0	0	0	0	0	0	0	0	0
GI25	SAPA_G1007	DBS_20001356.scaffold_C2869_orf00039	Baseplate assembly protein	Phage	-	303	-	4130		0	0	0	0	0	0	0	0	0	0	0	0	0	0	0	0	0	0	0	0	0	0	0	0	0	0	0	0	0	0	0	0	0	0	0	0	0	0	0	0
GI25	SAPA_G1008	DBS_20001356.scaffold_C2869_orf00038	Baseplate assembly protein	Phage	-	116	-	4131		0	0	0	0	0	0	0	0	0	0	0	0	0	0	0	0	0	0	0	0	0	0	0	0	0	0	0	0	0	0	0	0	0	0	0	0	0	0	0	0
GI25	SAPA_G1009	DBS_20090461.scaffold_C2888_orf00038	Baseplate assembly protein V	Phage	-	214	-	4132		0	0	0	0	0	0	0	0	0	0	0	0	0	0	0	0	0	0	0	0	0	0	0	0	0	0	0	0	0	0	0	0	0	0	0	0	0	0	0	0
GI25	SAPA_G1010	DBS_20090461.scaffold_C2888_orf00037	Phage virion morphogenesis protein	Phage	-	150	-	4133		0	0	0	0	0	0	0	0	0	0	0	0	0	0	0	0	0	0	0	0	0	0	0	0	0	0	0	0	0	0	0	0	0	0	0	0	0	0	0	0
GI25	SAPA_G1011	DBS_20090461.scaffold_C2888_orf00035	P2 phage tail completion protein R	Phage	-	156	-	4134		0	0	0	0	0	0	0	0	0	0	0	0	0	0	0	0	0	0	0	0	0	0	0	0	0	0	0	0	0	0	0	0	0	0	0	0	0	0	0	0
GI25	SAPA_G1012	DBS_20001356.scaffold_C2869_orf00033	Phage lysis protein LysC	Phage	-	53	-	4135		0	0	0	0	0	0	0	0	0	0	0	0	0	0	0	0	0	0	0	0	0	0	0	0	0	0	0	0	0	0	0	0	0	0	0	0	0	0	0	0
GI25	SAPA_G1013	DBS_20001356.scaffold_C2869_orf00032	Protein LysB	Phage	-	138	-	4136		0	0	0	0	0	0	0	0	0	0	0	0	0	0	0	0	0	0	0	0	0	0	0	0	0	0	0	0	0	0	0	0	0	0	0	0	0	0	0	0
GI25	SAPA_G1014	MC_09-0426.scaffold_scaffold47_orf00059	Lysozyme	Phage	-	166	-	4137		0	0	0	0	0	0	0	0	0	0	0	0	0	0	1	0	0	0	0	0	1	0	0	0	0	0	0	0	0	0	0	0	0	0	1	0	0	0	0	0
GI25	SAPA_G1015	DBS_20090461.scaffold_C2888_orf00031	Phage holin GpY	Phage	-	99	-	4138		0	0	0	0	0	0	0	0	0	0	0	0	0	0	1	0	0	0	0	0	1	0	0	0	0	0	0	0	0	0	0	0	0	0	1	0	0	0	0	0
GI25	SAPA_G1016	WS0301.scaffold_scaffold3_orf00056	Phage Tail Protein X	Phage	-	68	-	4139		0	0	0	0	0	0	0	0	0	0	0	0	0	0	0	0	0	0	0	0	0	0	0	0	0	0	0	0	0	0	0	0	0	0	0	0	0	0	0	0
GI25	SAPA_G1017	DBS_20090461.scaffold_C2888_orf00028	Phage head completion protein	Phage	-	169	-	4140		0	0	0	0	0	0	0	0	0	0	0	0	0	0	0	0	0	0	0	0	0	0	0	0	0	0	0	0	0	0	0	0	0	0	0	0	0	0	0	0
GI25	SAPA_G1018	DBS_20090461.scaffold_C2888_orf00026	Terminase, endonuclease subunit	Phage	-	241	-	4141		0	0	0	0	0	0	0	0	0	0	0	0	0	0	0	0	0	0	0	0	0	0	0	0	0	0	0	0	0	0	0	0	0	0	0	0	0	0	0	0
GI25	SAPA_G1019	DBS_20001356.scaffold_C2869_orf00023	Phage major capsid protein, P2 family	Phage	-	356	-	4142		0	0	0	0	0	0	0	0	0	0	0	0	0	0	0	0	0	0	0	0	0	0	0	0	0	0	0	0	0	0	0	0	0	0	0	0	0	0	0	0
GI25	SAPA_G1020	DBS_20090461.scaffold_C2888_orf00024	V protein	Phage	-	285	-	4143		0	0	0	0	0	0	0	0	0	0	0	0	0	0	1	0	0	0	0	0	1	0	0	0	0	0	0	0	0	0	0	0	0	0	1	0	0	0	0	0
GI25	SAPA_G1021	MC_05-0811.scaffold_scaffold46_orf00050	Terminase, ATPase subunit	Phage	-	591	-	4144		0	0	0	0	0	0	0	0	0	0	0	0	0	0	1	0	0	0	0	0	1	0	0	0	0	0	0	0	0	0	0	0	0	0	1	0	0	0	0	0
GI25	SAPA_G1022	DBS_20090461.scaffold_C2888_orf00021	Phage portal protein, pbsx family	Phage	-	349	-	4145		0	0	0	0	0	0	0	0	0	0	0	0	0	0	0	0	0	0	0	0	0	0	0	0	0	0	0	0	0	0	0	0	0	0	0	0	0	0	0	0
GI25	SAPA_G1023	DBS_20090461.scaffold_C2888_orf00019	Gp98	Phage	-	360	-	4146		0	0	0	0	0	0	0	0	0	0	0	0	0	0	0	0	0	0	0	0	0	0	0	0	0	0	0	0	0	0	0	0	0	0	0	0	0	0	0	0
GI25	SAPA_G1024	DBS_20090461.scaffold_C2888_orf00017	Gp96	Phage	-	309	-	4147		0	0	0	0	0	0	0	0	0	0	0	0	0	0	0	0	0	0	0	0	0	0	0	0	0	0	0	0	0	0	0	0	0	0	0	0	0	0	0	0
GI25	SAPA_G1025	DBS_20090461.scaffold_C2888_orf00016	Cytosine-specific methyltransferase	Phage	-	312	-	4148		0	0	0	0	0	0	0	0	0	0	0	0	0	0	0	0	0	0	0	0	0	0	0	0	0	0	0	0	0	0	0	0	0	0	0	0	0	0	0	0
GI25	SAPA_G1026	DBS_20090461.scaffold_C2888_orf00015	SOS operon TUM protein	Phage	-	56	-	4149		0	0	0	0	0	0	0	0	0	0	0	0	0	0	0	0	0	0	0	0	0	0	0	0	0	0	0	0	0	0	0	0	0	0	0	0	0	0	0	0
GI25	SAPA_G1027	DBS_20001356.scaffold_C2869_orf00017	AAA ATPase	Phage	-	406	-	4150		0	0	0	0	0	0	0	0	0	0	0	0	0	0	0	0	0	0	0	0	0	0	0	0	0	0	0	0	0	0	0	0	0	0	0	0	0	0	0	0
GI25	SAPA_G1028	DBS_20001356.scaffold_C2869_orf00012	Bacteriophage sos operon Tum protein	Phage	-	63	-	4151		0	0	0	0	0	0	0	0	0	0	0	0	0	0	0	0	0	0	0	0	0	0	0	0	0	0	0	0	0	0	0	0	0	0	0	0	0	0	0	0
GI25	SAPA_G1029	DBS_20090461.scaffold_C2888_orf00014	Bacteriophage replication protein	Phage	-	708	-	4152		0	0	0	0	0	0	0	0	0	0	0	0	0	0	0	0	0	0	0	0	0	0	0	0	0	0	0	0	0	0	0	0	0	0	0	0	0	0	0	0
GI25	SAPA_G1030	DBS_20090461.scaffold_C2888_orf00012	Gp51 family protein	Phage	-	335	-	4153		0	0	0	0	0	0	0	0	0	0	0	0	0	0	0	0	0	0	0	0	0	0	0	0	0	0	0	0	0	0	0	0	0	0	0	0	0	0	0	0
GI25	SAPA_G1031	DBS_20090461.scaffold_C2888_orf00011	Predicted phage protein	Phage	-	93	-	4154		0	0	0	0	0	0	0	0	0	0	0	0	0	0	0	0	0	0	0	0	0	0	0	0	0	0	0	0	0	0	0	0	0	0	0	0	0	0	0	0
GI25	SAPA_G1032	DBS_20090461.scaffold_C2888_orf00010	Uncharacterized exonuclease CP81	Phage	-	195	-	4155		0	0	0	0	0	0	0	0	0	0	0	0	0	0	0	0	0	0	0	0	0	0	0	0	0	0	0	0	0	0	0	0	0	0	0	0	0	0	0	0
GI25	SAPA_G1033	WS0301.scaffold_scaffold3_orf00083	Repressor protein CI	Phage	-	90	-	4156		0	0	0	0	0	0	0	0	0	0	0	0	0	0	0	0	0	0	0	0	0	0	0	0	0	0	0	0	0	0	0	0	0	0	0	0	0	0	0	0
GI25	SAPA_G1034	DBS_20001356.scaffold_C2869_orf00003	Protein apl	Phage	-	88	apl	4157		0	0	0	0	0	0	0	0	0	0	0	0	0	0	0	0	0	0	0	0	0	0	0	0	0	0	0	0	0	0	0	0	0	0	0	0	0	0	0	0
GI25	SAPA_G1035	DBS_20001356.scaffold_C2869_orf00002	Phage integrase family protein	Phage	-	346	-	4158		0	0	0	0	0	0	0	0	0	0	0	0	0	0	0	0	0	0	0	0	0	0	0	0	0	0	0	0	0	0	0	0	0	0	0	0	0	0	0	0
GI25	SAPA_G1036	WS0301.scaffold_scaffold3_orf00087	Putative uncharacterized protein	Phage	-	359	-	4159		0	0	0	0	0	0	0	0	0	0	0	0	0	0	0	0	0	0	0	0	0	0	0	0	0	0	0	0	0	0	0	0	0	0	0	0	0	0	0	0
GI26	SAPA_G1041	WS1035.scaffold_scaffold3_orf00080	Flagellin	Genomic	-	593	fliC	4196		0	0	0	0	0	0	0	0	0	0	0	0	0	0	0	0	0	0	0	0	0	0	0	0	0	0	0	0	0	0	0	0	0	0	0	0	0	0	0	0
GI26	SAPA_G1042	WS1035.scaffold_scaffold3_orf00081	Putative uncharacterized protein	Genomic	-	193	-	4197		0	0	0	0	0	0	0	0	0	0	0	0	0	0	0	0	0	0	0	0	0	0	0	0	0	0	0	0	0	0	0	0	0	0	0	0	0	0	0	0
GI26	SAPA_G1043	WS1035.scaffold_scaffold3_orf00084	Putative uncharacterized protein	Genomic	-	576	-	4198		0	0	0	0	0	0	0	0	0	0	0	0	0	0	0	0	0	0	0	0	0	0	0	0	0	0	0	0	0	0	0	0	0	0	0	0	0	0	0	0
GI27	SAPA_G1044	SeAg_B3792	probable low-affinity inorganic phosphate transporter 2	Genomic	-	498	-	4536		1	1	1	1	1	1	1	1	1	1	1	1	1	1	1	1	1	1	1	1	1	1	1	1	1	1	1	1	1	1	1	1	1	1	1	1	1	1	1	1
GI27	SAPA_G1045	SeAg_B3793	universal stress protein B	Genomic	-	93	-	4537		1	1	1	1	1	1	1	1	1	1	1	1	1	1	1	1	1	1	1	1	1	1	1	1	1	1	1	1	1	1	1	1	1	1	1	1	1	1	1	1
GI27	SAPA_G1046	SeAg_B3794	universal stress protein A	Genomic	-	144	uspA	4538		1	1	1	1	1	1	1	1	1	1	1	1	1	1	1	1	1	1	1	1	1	1	1	1	1	1	1	1	1	1	1	1	1	1	1	1	1	1	1	1
GI27	SAPA_G1047	SeAg_B3795	tripeptide permease TppB	Genomic	-	490	-	4539		1	1	1	1	1	1	1	1	1	1	1	1	1	1	1	1	1	1	1	1	1	1	1	1	1	1	1	1	1	1	1	1	1	1	1	1	1	1	1	1
GI27	SAPA_G1048	SeAg_B3796	protein YhiQ	Genomic	-	252	-	4540		1	1	1	1	1	1	1	1	1	1	1	1	1	1	1	1	1	1	1	1	1	1	1	1	1	1	1	1	1	1	1	1	1	1	1	1	1	1	1	1
GI28	SAPA_G1049	SF_R0374_09.scaffold_scaffold12_orf00424	Integrase family protein	Phage	-	420	-	4695		0	0	0	0	0	0	0	0	0	0	0	0	0	0	0	0	0	0	0	0	0	0	0	0	0	0	0	0	0	0	0	0	0	0	0	0	0	0	0	0
GI28	SAPA_G1050	SF_R0374_09.scaffold_scaffold12_orf00425	Conserved domain protein	Phage	-	314	-	4696		0	0	0	0	0	0	0	0	0	0	0	0	0	0	0	0	0	0	0	0	0	0	0	0	0	0	0	0	0	0	0	0	0	0	0	0	0	0	0	0
GI28	SAPA_G1051	SF_R0374_09.scaffold_scaffold12_orf00426	Phage transcriptional regulator, AlpA	Phage	-	68	-	4697		0	0	0	0	0	0	0	0	0	0	0	0	0	0	0	0	0	0	0	0	0	0	0	0	0	0	0	0	0	0	0	0	0	0	0	0	0	0	0	0
GI28	SAPA_G1052	SF_R0374_09.scaffold_scaffold12_orf00427	Putative prophage protein	Phage	-	145	-	4698		0	0	0	0	0	0	0	0	0	0	0	0	0	0	0	0	0	0	0	0	0	0	0	0	0	0	0	0	0	0	0	0	0	0	0	0	0	0	0	0
GI28	SAPA_G1053	SF_R0374_09.scaffold_scaffold12_orf00429	Putative anti-repressor protein	Phage	-	270	-	4699		0	0	0	0	0	0	0	0	0	0	0	0	0	0	0	0	0	0	0	0	0	0	0	0	0	0	0	0	0	0	0	0	0	0	0	0	0	0	0	0
GI28	SAPA_G1054	SF_R0374_09.scaffold_scaffold12_orf00431	Putative uncharacterized protein	Phage	-	170	-	4700		0	0	0	0	0	0	0	0	0	0	0	0	0	0	0	0	0	0	0	0	0	0	0	0	0	0	0	0	0	0	0	0	0	0	0	0	0	0	0	0
GI28	SAPA_G1055	SF_R0374_09.scaffold_scaffold12_orf00432	Similar to phage immunity repressor protein	Phage	-	276	-	4701		0	0	0	0	0	0	0	0	0	0	0	0	0	0	0	0	0	0	0	0	0	0	0	0	0	0	0	0	0	0	0	0	0	0	0	0	0	0	0	0
GI28	SAPA_G1056	SF_R0374_09.scaffold_scaffold12_orf00436	2-polyprenyl phenol hydroxylase	Phage	-	209	-	4702		0	0	0	0	0	0	0	0	0	0	0	0	0	0	0	0	0	0	0	0	0	0	0	0	0	0	0	0	0	0	0	0	0	0	0	0	0	0	0	0
GI28	SAPA_G1057	SF_R0374_09.scaffold_scaffold12_orf00438	Conserved domain protein	Phage	-	116	-	4703		0	0	0	0	0	0	0	0	0	0	0	0	0	0	0	0	0	0	0	0	0	0	0	0	0	0	0	0	0	0	0	0	0	0	0	0	0	0	0	0
GI28	SAPA_G1058	SF_R0374_09.scaffold_scaffold12_orf00441	Zinc-binding domain of primase-helicase family protein	Phage	-	920	-	4704		0	0	0	0	0	0	0	0	0	0	0	0	0	0	0	0	0	0	0	0	0	0	0	0	0	0	0	0	0	0	0	0	0	0	0	0	0	0	0	0
GI28	SAPA_G1059	SF_R0374_09.scaffold_scaffold12_orf00443	Activator of ProP osmoprotectant transporter	Phage	-	163	-	4705		0	0	0	0	0	0	0	0	0	0	0	0	0	0	0	0	0	0	0	0	0	0	0	0	0	0	0	0	0	0	0	0	0	0	0	0	0	0	0	0
GI28	SAPA_G1060	SF_R0374_09.scaffold_scaffold12_orf00444	PerC transcriptional activator	Phage	-	92	-	4706		0	0	0	0	0	0	0	0	0	0	0	0	0	0	0	0	0	0	0	0	0	0	0	0	0	0	0	0	0	0	0	0	0	0	0	0	0	0	0	0
GI28	SAPA_G1061	SF_R0374_09.scaffold_scaffold12_orf00445	hypothetical protein	Phage	-	107	-	4707		0	0	0	0	0	0	0	0	0	0	0	0	0	0	0	0	0	0	0	0	0	0	0	0	0	0	0	0	0	0	0	0	0	0	0	0	0	0	0	0
GI28	SAPA_G1062	SF_R0374_09.scaffold_scaffold12_orf00446	hypothetical protein	Phage	-	990	-	4708		0	0	0	0	0	0	0	0	0	0	0	0	0	0	0	0	0	0	0	0	0	0	0	0	0	0	0	0	0	0	0	0	0	0	0	0	0	0	0	0
GI28	SAPA_G1063	SF_R0374_09.scaffold_scaffold12_orf00451	Prophage protein	Phage	-	92	-	4709		0	0	0	0	0	0	0	0	0	0	0	0	0	0	0	0	0	0	0	0	0	0	0	0	0	0	0	0	0	0	0	0	0	0	0	0	0	0	0	0
GI29	SAPA_G1064	DBS_20001356.scaffold_scaffold10_orf00002	Site-specific recombinase, phage integrase family	Phage	-	394	-	4725		0	0	0	0	0	0	0	0	0	0	0	0	0	0	0	0	0	0	0	0	0	0	0	0	0	0	0	0	0	0	0	0	0	0	0	0	0	0	0	0
GI29	SAPA_G1065	DBS_20001356.scaffold_scaffold10_orf00001	ATPase involved in DNA repair	Phage	-	891	-	4726		0	0	0	0	0	0	0	0	0	0	0	0	0	0	0	0	0	0	0	0	0	0	0	0	0	0	0	0	0	0	0	0	0	0	0	0	0	0	0	0
GI29	SAPA_G1066	CS_CC08.043_111212_1.remap_scaffold44_orf00080	Putative uncharacterized protein	Phage	-	624	-	4727		0	0	0	0	0	0	0	0	0	0	0	0	0	0	0	0	0	0	0	0	0	0	0	0	0	0	0	0	0	0	0	0	0	0	1	0	0	0	0	0
GI29	SAPA_G1067	CS_CC08.043_111212_1.remap_scaffold44_orf00081	Putative uncharacterized protein	Phage	-	116	-	4728		0	0	0	0	0	0	0	0	0	0	0	0	0	0	0	0	0	0	0	0	0	0	0	0	0	0	0	0	0	0	0	0	0	0	1	0	0	0	0	0
GI29	SAPA_G1068	CS_CC08.043_111212_1.remap_scaffold44_orf00083	P4 psu-like protein	Phage	-	191	-	4729		0	0	0	0	0	0	0	0	0	0	0	0	0	0	0	0	0	0	0	0	0	0	0	0	0	0	0	0	0	0	0	0	0	0	1	0	0	0	0	0
GI29	SAPA_G1069	DBS_20001356.scaffold_C2449_orf00003	Glycoprotein 3, capsid size determination protein Sid	Phage	-	245	-	4730		0	0	0	0	0	0	0	0	0	0	0	0	0	0	0	0	0	0	0	0	0	0	0	0	0	0	0	0	0	0	0	0	0	0	1	0	0	0	0	0
GI29	SAPA_G1070	DBS_20001356.scaffold_C2401_orf00001	Phage transcriptional regulator, AlpA	Phage	-	89	-	4731		0	0	0	0	0	0	0	0	0	0	0	0	0	0	0	0	0	0	0	0	0	0	0	0	0	0	0	0	0	0	0	0	0	0	1	0	0	0	0	0
GI29	SAPA_G1071	CS_CC08.043_111212_1.remap_scaffold44_orf00090	Phage protein	Phage	-	197	-	4732		0	0	0	0	0	0	0	0	0	0	0	0	0	0	0	0	0	0	0	0	0	0	0	0	0	0	0	0	0	0	0	0	0	0	1	0	0	0	0	0
GI29	SAPA_G1072	CS_CC08.043_111212_1.remap_scaffold44_orf00091	Derepression protein,COG2213	Phage	-	96	-	4733		0	0	0	0	0	0	0	0	0	0	0	0	0	0	0	0	0	0	0	0	0	0	0	0	0	0	0	0	0	0	0	0	0	0	1	0	0	0	0	0
GI29	SAPA_G1073	DBS_20001356.scaffold_C2453_orf00001	P4 prophage-derived protein	Phage	-	152	-	4734		0	0	0	0	0	0	0	0	0	0	0	0	0	0	0	0	0	0	0	0	0	0	0	0	0	0	0	0	0	0	0	0	0	0	1	0	0	0	0	0
GI29	SAPA_G1074	DBS_20001356.scaffold_C2453_orf00002	Cnr-like protein	Phage	-	107	-	4735		0	0	0	0	0	0	0	0	0	0	0	0	0	0	0	0	0	0	0	0	0	0	0	0	0	0	0	0	0	0	0	0	0	0	1	0	0	0	0	0
GI29	SAPA_G1075	CS_CC08.043_111212_1.remap_scaffold44_orf00095	Phage/plasmid primase, P4 family	Phage	-	778	-	4736		0	0	0	0	0	0	0	0	0	0	0	0	0	0	0	0	0	0	0	0	0	0	0	0	0	0	0	0	0	0	0	0	0	0	1	0	0	0	0	0
GI30	SAPA_G1076	0703S19930_111212_1.remap_scaffold47_orf00082	Phage integrase family protein	IME	-	390	-	4833		0	0	0	0	0	0	0	0	0	0	0	0	0	0	0	0	0	1	0	0	0	0	0	0	0	0	0	0	0	0	0	0	0	0	0	0	0	0	0	0
GI30	SAPA_G1077	0703S19930_111212_1.remap_scaffold47_orf00081	Putative uncharacterized protein	IME	-	559	-	4834		0	0	0	0	0	0	0	0	0	0	0	0	0	0	0	0	0	1	0	0	0	0	0	0	0	0	0	0	0	0	0	0	0	0	0	0	0	0	0	0
GI30	SAPA_G1079	0703S19930_111212_1.remap_scaffold47_orf00077	Putative uncharacterized protein	IME	-	216	-	4836		0	0	0	0	0	0	0	0	0	0	0	0	0	0	0	0	0	1	0	0	0	0	0	0	0	0	0	0	0	0	0	0	0	0	0	0	0	0	0	0
GI30	SAPA_G1080	0703S19930_111212_1.remap_scaffold47_orf00076	Death-on-curing family protein	IME	-	60	-	4837		0	0	0	0	0	0	0	0	0	0	0	0	0	0	0	0	0	1	0	0	0	0	0	0	0	0	0	0	0	0	0	0	0	0	0	0	0	0	0	0
GI30	SAPA_G1081	0703S19930_111212_1.remap_scaffold47_orf00075	CiaB protein	IME	-	338	CiaB	4838		0	0	0	0	0	0	0	0	0	0	0	0	0	0	0	0	0	1	0	0	0	0	0	0	0	0	0	0	0	0	0	0	0	0	0	0	0	0	0	0
GI30	SAPA_G1082	0703S19930_111212_1.remap_scaffold47_orf00074	Type I restriction-modification system endonuclease	IME	-	1077	-	4839		0	0	0	0	0	0	0	0	0	0	0	0	0	0	0	0	0	1	0	0	0	0	0	0	0	0	0	0	0	0	0	0	0	0	0	0	0	0	0	0
GI30	SAPA_G1083	0703S19930_111212_1.remap_scaffold47_orf00073	Type I restriction modification DNA specificity domain protein	IME	-	429	-	4840		0	0	0	0	0	0	0	0	0	0	0	0	0	0	0	0	0	1	0	0	0	0	0	0	0	0	0	0	0	0	0	0	0	0	0	0	0	0	0	0
GI30	SAPA_G1084	0703S19930_111212_1.remap_scaffold47_orf00071	Type I restriction-modification system DNA-methyltransferase subunit M	IME	-	661	-	4841		0	0	0	0	0	0	0	0	0	0	0	0	0	0	0	0	0	1	0	0	0	0	0	0	0	0	0	0	0	0	0	0	0	0	0	0	0	0	0	0
GI30	SAPA_G1085	0703S19930_111212_1.remap_scaffold47_orf00069	Resolvase domain-containing protein	IME	-	208	-	4842		0	0	0	0	0	0	0	0	0	0	0	0	0	0	0	0	0	1	0	0	0	0	0	0	0	0	0	0	0	0	0	0	0	0	0	0	0	0	0	0
GI30	SAPA_G1086	0703S19930_111212_1.remap_scaffold47_orf00066	Putative uncharacterized protein	IME	-	281	-	4843		0	0	0	0	0	0	0	0	0	0	0	0	0	0	0	0	0	1	0	0	0	0	0	0	0	0	0	0	0	0	0	0	0	0	0	0	0	0	0	0
GI30	SAPA_G1087	MC_09-0426.scaffold_scaffold51_orf00030	Phage integrase family protein	IME	-	421	-	4844		0	0	0	0	0	0	0	0	0	0	0	0	0	0	0	0	0	0	0	0	0	0	0	1	0	0	0	0	0	0	0	0	0	0	0	0	0	0	0	0
GI30	SAPA_G1088	MC_09-0426.scaffold_scaffold51_orf00032	Replication protein	IME	-	318	-	4845		0	0	0	0	0	0	0	0	0	0	0	0	0	0	0	0	0	0	0	0	0	0	0	1	0	0	0	0	0	0	0	0	0	0	0	0	0	0	0	0
GI30	SAPA_G1089	MC_09-0426.scaffold_scaffold51_orf00035	Type IV conjugative transfer system protein TraN	IME	F_traN	920	-	4846		0	0	0	0	0	0	0	0	0	0	0	0	0	0	0	0	0	0	0	0	0	0	0	1	0	0	0	0	0	0	0	0	0	0	0	0	0	0	0	0
GI30	SAPA_G1090	MC_09-0426.scaffold_scaffold51_orf00038	IncF plasmid conjugative transfer protein TraG	IME	-	1135	-	4847		0	0	0	0	0	0	0	0	0	0	0	0	0	0	0	0	0	0	0	0	0	0	0	1	0	0	0	0	0	0	0	0	0	0	0	0	0	0	0	0
GI30	SAPA_G1091	MC_09-0426.scaffold_scaffold51_orf00039	TraH family protein	IME	F_traH	475	-	4848		0	0	0	0	0	0	0	0	0	0	0	0	0	0	0	0	0	0	0	0	0	0	0	1	0	0	0	0	0	0	0	0	0	0	0	0	0	0	0	0
GI30	SAPA_G1092	MC_09-0426.scaffold_scaffold51_orf00041	Putative uncharacterized protein	IME	-	286	-	4849		0	0	0	0	0	0	0	0	0	0	0	0	0	0	0	0	0	0	0	0	0	0	0	1	0	0	0	0	0	0	0	0	0	0	0	0	0	0	0	0
GI30	SAPA_G1093	MC_09-0426.scaffold_scaffold51_orf00043	Putative uncharacterized protein	IME	-	146	-	4850		0	0	0	0	0	0	0	0	0	0	0	0	0	0	0	0	0	0	0	0	0	0	0	0	0	0	0	0	0	0	0	0	0	0	0	0	0	0	0	0
GI30	SAPA_G1094	MC_09-0426.scaffold_scaffold51_orf00045	Phage integrase family protein	IME	-	322	-	4851		0	0	0	0	0	0	0	0	0	0	0	0	0	0	0	0	0	0	0	0	0	0	0	1	0	0	0	0	0	0	0	0	0	0	0	0	0	0	0	0
GI30	SAPA_G1095	MC_09-0426.scaffold_scaffold51_orf00047	BsuBIPstI restriction endonuclease domain protein	IME	-	359	-	4852		0	0	0	0	0	0	0	0	0	0	0	0	0	0	0	0	0	0	0	0	0	0	0	1	0	0	0	0	0	0	0	0	0	0	0	0	0	0	0	0
GI30	SAPA_G1096	MC_09-0426.scaffold_scaffold51_orf00048	Eco57I restriction endonuclease	IME	-	610	-	4853		0	0	0	0	0	0	0	0	0	0	0	0	0	0	0	0	0	0	0	0	0	0	0	1	0	0	0	0	0	0	0	0	0	0	0	0	0	0	0	0
GI30	SAPA_G1098	MC_09-0426.scaffold_scaffold51_orf00051	Integrase/recombinase (E2 protein)	IME	-	338	intI1	4855		0	0	0	0	0	0	0	0	0	0	0	0	0	0	0	0	0	0	0	0	0	0	0	1	0	0	0	0	0	0	0	0	0	0	0	0	0	0	0	0
GI30	SAPA_G1099	MC_09-0426.scaffold_scaffold51_orf00052	Aminoglycoside adenyltransferase	IME	-	315	aadA2	4856		0	0	0	0	0	0	0	0	0	0	0	0	0	0	0	0	0	0	0	0	0	0	0	0	0	0	0	0	0	0	0	0	0	0	0	0	0	0	0	0
GI30	SAPA_G1100	CS_NB04.055_111212_1.remap_C2362_orf00001	Aminoglycoside adenyltransferase A2	IME	-	260	aadA2	4857		0	0	0	0	0	0	0	0	0	0	0	0	0	0	0	0	0	0	0	0	0	0	0	1	0	0	0	0	0	0	0	0	0	0	0	0	0	0	0	0
GI30	SAPA_G1101	CS_NB04.055_111212_1.remap_C2386_orf00001	Beta-lactamase PSE1	IME	-	305	-	4858		0	0	0	0	0	0	0	0	0	0	0	0	0	0	0	0	0	0	0	0	0	0	0	1	0	0	0	0	0	0	0	0	0	0	0	0	0	0	0	0
GI30	SAPA_G1102	MC_09-0426.scaffold_scaffold51_orf00053	Dihydropteroate synthase protein	IME	-	280	floR	4859		0	0	0	0	0	0	0	0	0	0	0	0	0	0	0	0	0	0	0	0	0	0	0	1	0	0	0	0	0	0	0	0	0	0	0	0	0	0	0	0
GI30	SAPA_G1105	MC_09-0426.scaffold_scaffold51_orf00057	Tn402-like TniB NTP-binding protein	IME	-	287	tniB	4862		0	0	0	0	0	0	0	0	0	0	0	0	0	0	0	0	0	0	0	0	0	0	0	0	0	0	0	0	0	0	0	0	0	0	0	0	0	0	0	0
GI30	SAPA_G1106	CS_NB04.055_111212_1.remap_C2598_orf00010	Resistance to sulphonamides protein	IME	-	124	sul1	4863		0	0	0	0	0	0	0	0	0	0	0	0	0	0	0	0	0	0	0	0	0	0	0	1	0	0	0	0	0	0	0	0	0	0	0	0	0	0	0	0
GI30	SAPA_G1107	CS_NB04.055_111212_1.remap_C2598_orf00009	Phenicol exporter	IME	-	405	-	4864		0	0	0	0	0	0	0	0	0	0	0	0	0	0	0	0	0	0	0	0	0	0	0	1	0	0	0	0	0	0	0	0	0	0	0	0	0	0	0	0
GI30	SAPA_G1108	CS_NB04.055_111212_1.remap_C2598_orf00008	Tetracycline repressor protein class G	IME	-	209	tetR	4865		0	0	0	0	0	0	0	0	0	0	0	0	0	0	0	0	0	0	0	0	0	0	0	1	0	0	0	0	0	0	0	0	0	0	0	0	0	0	0	0
GI30	SAPA_G1109	CS_NB04.055_111212_1.remap_C2598_orf00007	Tetracycline resistance protein, class G (TETA(G))	IME	-	392	tetA	4866		0	0	0	0	0	0	0	0	0	0	0	0	0	0	0	0	0	0	0	0	0	0	0	1	0	0	0	0	0	0	0	0	0	0	0	0	0	0	0	0
GI30	SAPA_G1110	CS_NB04.055_111212_1.remap_C2598_orf00006	Transcriptional regulator	IME	-	264	-	4867		0	0	0	0	0	0	0	0	0	0	0	0	0	0	0	0	0	0	0	0	0	0	0	1	0	0	0	0	0	0	0	0	0	0	0	0	0	0	0	0
GI30	SAPA_G1112	CS_NB04.055_111212_1.remap_C2598_orf00003	Hypothetical protein	IME	-	154	-	4869		0	0	0	0	0	0	0	0	0	0	0	0	0	0	0	0	0	0	0	0	0	0	0	1	0	0	0	0	0	0	0	0	0	0	0	0	0	0	0	0
GI30	SAPA_G1113	CS_NB04.055_111212_1.remap_C2598_orf00001	GroEL-like/integrase protein	IME	-	93	-	4870		0	0	0	0	0	0	0	0	0	0	0	0	0	0	0	0	0	0	0	0	0	0	0	1	0	0	0	0	0	0	0	0	0	0	0	0	0	0	0	0
GI30	SAPA_G1114	CS_NB04.055_111212_1.remap_scaffold44_orf00069	Putative transposase	IME	-	274	-	4871		0	0	0	0	0	0	0	0	0	0	0	0	0	0	0	0	0	0	0	0	0	0	0	1	0	0	0	0	0	0	0	0	0	0	0	0	0	0	0	0
GI30	SAPA_G1115	MC_04-0873.scaffold_C2523_orf00002	PecM-like protein	IME	-	287	-	4872		0	0	0	0	0	0	0	0	0	0	0	0	0	0	0	0	0	0	0	0	0	0	0	0	0	0	0	0	0	1	0	0	0	0	0	0	0	0	0	0
GI30	SAPA_G1116	MC_04-0873.scaffold_C2523_orf00004	Class A tetracycline resistance protein	IME	-	425	tetA	4873		0	0	0	0	0	0	0	0	0	0	0	0	0	0	0	0	0	0	0	0	0	0	0	0	0	0	0	0	0	1	0	0	0	0	0	0	0	0	0	0
GI30	SAPA_G1117	MC_09-0426.scaffold_C2561_orf00005	Tetracycline repressor protein class A from transposon 1721	IME	-	226	tetR	4874		0	0	0	0	0	0	0	0	0	0	0	0	0	0	0	0	0	0	0	0	0	0	0	0	0	0	0	0	0	1	0	0	0	0	0	0	0	0	0	0
GI30	SAPA_G1118	MC_04-0873.scaffold_scaffold27_orf00027	MerR transcriptional regular	IME	-	145	-	4875		0	0	0	0	0	0	0	0	0	0	0	0	0	0	0	0	0	0	0	0	0	0	0	0	0	0	0	0	0	1	0	0	0	0	0	0	0	0	0	0
GI30	SAPA_G1119	MC_04-0873.scaffold_scaffold27_orf00028	Mercuric transport protein	IME	-	117	-	4876		0	0	0	0	0	0	0	0	0	0	0	0	0	0	0	0	0	0	0	0	0	0	0	0	0	0	0	0	0	1	0	0	0	0	0	0	0	0	0	0
GI30	SAPA_G1120	MC_04-0873.scaffold_scaffold27_orf00029	Mercuric transport protein periplasmic component	IME	-	92	-	4877		0	0	0	0	0	0	0	0	0	0	0	0	0	0	0	0	0	0	0	0	0	0	0	0	0	0	0	0	0	1	0	0	0	0	0	0	0	0	0	0
GI30	SAPA_G1121	MC_04-0873.scaffold_scaffold27_orf00030	Mercuric transport protein	IME	-	141	-	4878		0	0	0	0	0	0	0	0	0	0	0	0	0	0	0	0	0	0	0	0	0	0	0	0	0	0	0	0	0	1	0	0	0	0	0	0	0	0	0	0
GI30	SAPA_G1122	WS1035.scaffold_scaffold4_orf00029	TniA; integrase core domain	IME	-	413	-	4879		0	0	0	0	0	0	0	0	0	0	0	0	0	0	0	0	0	0	0	0	0	0	0	0	0	0	0	0	0	1	0	1	0	0	0	0	0	0	0	0
GI30	SAPA_G1123	MC_09-0426.scaffold_scaffold42_orf00002	Putative uncharacterized protein	IME	-	345	-	4880		0	0	0	0	0	0	0	0	0	0	0	0	0	0	0	0	0	0	0	0	0	0	0	1	0	0	0	0	0	0	0	0	0	0	0	0	0	0	0	0
GI31	SAPA_G1124	MC_05-0811.scaffold_scaffold46_orf00033	Site-specific recombinase, phage integrase family	Phage	-	327	-	5098		0	0	0	0	0	0	0	0	0	0	0	0	0	0	1	0	0	0	0	0	1	0	0	0	0	0	0	0	0	0	0	0	0	0	1	0	0	0	0	0
GI31	SAPA_G1125	MC_09-0426.scaffold_scaffold47_orf00035	Cox protein	Phage	-	91	Cox	5099		0	0	0	0	0	0	0	0	0	0	0	0	0	0	1	0	0	0	0	0	1	0	0	0	0	0	0	0	0	0	0	0	0	0	1	0	0	0	0	0
GI31	SAPA_G1126	MC_05-0811.scaffold_scaffold46_orf00036	Gp78	Phage	-	57	-	5100		0	0	0	0	0	0	0	0	0	0	0	0	0	0	1	0	0	0	0	0	1	0	0	0	0	0	0	0	0	0	0	0	0	0	1	0	0	0	0	0
GI31	SAPA_G1127	MC_05-0811.scaffold_scaffold46_orf00038	Replication gene B protein (GpB)	Phage	-	164	-	5101		0	0	0	0	0	0	0	0	0	0	0	0	0	0	1	0	0	0	0	0	1	0	0	0	0	0	0	0	0	0	0	0	0	0	1	0	0	0	0	0
GI31	SAPA_G1128	MC_09-0426.scaffold_scaffold47_orf00039	Uncharacterized 8.3 kDa protein in GpA 5'region	Phage	-	75	-	5102		0	0	0	0	0	0	0	0	0	0	0	0	0	0	1	0	0	0	0	0	1	0	0	0	0	0	0	0	0	0	0	0	0	0	1	0	0	0	0	0
GI31	SAPA_G1129	MC_05-0811.scaffold_scaffold46_orf00040	Gp81	Phage	-	101	-	5103		0	0	0	0	0	0	0	0	0	0	0	0	0	0	1	0	0	0	0	0	1	0	0	0	0	0	0	0	0	0	0	0	0	0	1	0	0	0	0	0
GI31	SAPA_G1130	MC_05-0811.scaffold_scaffold46_orf00041	Phage/conjugal plasmid C-4 type zinc finger protein, TraR family	Phage	-	75	-	5104		0	0	0	0	0	0	0	0	0	0	0	0	0	0	1	0	0	0	0	0	1	0	0	0	0	0	0	0	0	0	0	0	0	0	1	0	0	0	0	0
GI31	SAPA_G1131	MC_09-0426.scaffold_scaffold47_orf00043	Gp83	Phage	-	92	-	5105		0	0	0	0	0	0	0	0	0	0	0	0	0	0	1	0	0	0	0	0	1	0	0	0	0	0	0	0	0	0	0	0	0	0	1	0	0	0	0	0
GI31	SAPA_G1132	0309W51997_111212_1.remap_scaffold38_orf00116	Replication gene A protein	Phage	-	759	gpa	5106		0	0	0	0	0	0	0	0	0	0	0	0	0	0	1	0	0	0	0	0	1	0	0	0	0	0	0	0	0	0	0	0	0	0	1	0	0	0	0	0
GI31	SAPA_G1037	DBS_20062828_111212_2.remap_C3131_orf00016	ASCH domain protein	Phage	-	152	-	5107		0	0	0	0	0	0	0	0	0	0	0	0	0	0	0	0	0	0	0	0	0	0	0	0	0	0	0	0	0	0	0	0	0	0	0	0	0	0	0	0
GI31	SAPA_G1038	DBS_20062828_111212_2.remap_C3131_orf00019	Putative uncharacterized protein	Phage	-	372	-	5108		0	0	0	0	0	0	0	0	0	0	0	0	0	0	0	0	0	0	0	0	0	0	0	0	0	0	0	0	0	0	0	0	0	0	0	0	0	0	0	0
GI31	SAPA_G1039	DBS_20062828_111212_2.remap_C3131_orf00020	Putative uncharacterized protein	Phage	-	340	-	5109		0	0	0	0	0	0	0	0	0	0	0	0	0	0	0	0	0	0	0	0	0	0	0	0	0	0	0	0	0	0	0	0	0	0	0	0	0	0	0	0
GI31	SAPA_G1040	DBS_20062828_111212_2.remap_C3131_orf00021	D12 class N6 adenine-specific DNA methyltransferase	Phage	-	336	-	5110		0	0	0	0	0	0	0	0	0	0	0	0	0	0	0	0	0	0	0	0	0	0	0	0	0	0	0	0	0	0	0	0	0	0	0	0	0	0	0	0
GI31	SAPA_G1133	CS_CC08.043_111212_1.remap_scaffold39_orf00119	RNA-directed DNA polymerase	Phage	-	317	-	5111		0	0	0	0	0	0	0	0	0	0	0	0	0	0	0	0	0	0	0	0	0	0	0	0	0	0	0	0	0	0	0	0	0	0	1	0	0	0	0	0
GI31	SAPA_G1134	CS_CC08.043_111212_1.remap_scaffold39_orf00120	Putative uncharacterized protein	Phage	-	146	-	5112		0	0	0	0	0	0	0	0	0	0	0	0	0	0	0	0	0	0	0	0	0	0	0	0	0	0	0	0	0	0	0	0	0	0	1	0	0	0	0	0
GI31	SAPA_G1135	MC_09-0426.scaffold_scaffold47_orf00047	Putative uncharacterized protein	Phage	-	736	-	5113		0	0	0	0	0	0	0	0	0	0	0	0	0	0	0	0	0	0	0	0	0	0	0	0	0	0	0	0	0	0	0	0	0	0	0	0	0	0	0	0
GI31	SAPA_G1136	WR-10-02783_111212_5.remap_scaffold27_orf00116	Helicase c2	Phage	-	828	-	5114		0	0	0	0	0	0	0	0	0	0	0	0	0	0	0	0	0	0	0	0	1	0	0	0	0	0	0	0	0	0	0	0	0	0	0	0	0	0	0	0
GI31	SAPA_G1137	MC_05-0811.scaffold_scaffold46_orf00049	Phage portal protein, pbsx family	Phage	-	345	-	5115		0	0	0	0	0	0	0	0	0	0	0	0	0	0	1	0	0	0	0	0	1	0	0	0	0	0	0	0	0	0	0	0	0	0	1	0	0	0	0	0
GI31	SAPA_G1138	MC_05-0811.scaffold_scaffold46_orf00050	Terminase, ATPase subunit	Phage	-	591	-	5116		0	0	0	0	0	0	0	0	0	0	0	0	0	0	1	0	0	0	0	0	1	0	0	0	0	0	0	0	0	0	0	0	0	0	1	0	0	0	0	0
GI31	SAPA_G1139	DBS_20090461.scaffold_C2888_orf00024	V protein	Phage	-	285	-	5117		0	0	0	0	0	0	0	0	0	0	0	0	0	0	1	0	0	0	0	0	1	0	0	0	0	0	0	0	0	0	0	0	0	0	1	0	0	0	0	0
GI31	SAPA_G1140	MC_09-0426.scaffold_scaffold47_orf00052	Major capsid protein	Phage	-	358	-	5118		0	0	0	0	0	0	0	0	0	0	0	0	0	0	1	0	0	0	0	0	1	0	0	0	0	0	0	0	0	0	0	0	0	0	1	0	0	0	0	0
GI31	SAPA_G1141	MC_09-0426.scaffold_scaffold47_orf00054	Phage small terminase subunit	Phage	-	233	-	5119		0	0	0	0	0	0	0	0	0	0	0	0	0	0	1	0	0	0	0	0	1	0	0	0	0	0	0	0	0	0	0	0	0	0	1	0	0	0	0	0
GI31	SAPA_G1142	0309W51997_111212_1.remap_scaffold38_orf00124	Head completion/stabilization protein (GpL)	Phage	-	169	-	5120		0	0	0	0	0	0	0	0	0	0	0	0	0	0	1	0	0	0	0	0	1	0	0	0	0	0	0	0	0	0	0	0	0	0	1	0	0	0	0	0
GI31	SAPA_G1143	MC_09-0426.scaffold_scaffold47_orf00056	phage tail protein GpX	Phage	-	68	-	5121		0	0	0	0	0	0	0	0	0	0	0	0	0	0	1	0	0	0	0	0	1	0	0	0	0	0	0	0	0	0	0	0	0	0	1	0	0	0	0	0
GI31	SAPA_G1144	DBS_20090461.scaffold_C2888_orf00031	Phage holin GpY	Phage	-	99	-	5122		0	0	0	0	0	0	0	0	0	0	0	0	0	0	1	0	0	0	0	0	1	0	0	0	0	0	0	0	0	0	0	0	0	0	1	0	0	0	0	0
GI31	SAPA_G1145	MC_09-0426.scaffold_scaffold47_orf00059	Lysozyme	Phage	-	166	-	5123		0	0	0	0	0	0	0	0	0	0	0	0	0	0	1	0	0	0	0	0	1	0	0	0	0	0	0	0	0	0	0	0	0	0	1	0	0	0	0	0
GI31	SAPA_G1146	MC_05-0811.scaffold_scaffold46_orf00060	Protein LysA	Phage	-	142	-	5124		0	0	0	0	0	0	0	0	0	0	0	0	0	0	1	0	0	0	0	0	1	0	0	0	0	0	0	0	0	0	0	0	0	0	1	0	0	0	0	0
GI31	SAPA_G1147	MC_05-0811.scaffold_scaffold46_orf00062	Phage lysis regulatory protein, LysB family	Phage	-	142	-	5125		0	0	0	0	0	0	0	0	0	0	0	0	0	0	1	0	0	0	0	0	1	0	0	0	0	0	0	0	0	0	0	0	0	0	1	0	0	0	0	0
GI31	SAPA_G1148	MC_09-0426.scaffold_scaffold47_orf00063	Phage lysis protein LysC	Phage	-	53	-	5126		0	0	0	0	0	0	0	0	0	0	0	0	0	0	1	0	0	0	0	0	1	0	0	0	0	0	0	0	0	0	0	0	0	0	1	0	0	0	0	0
GI31	SAPA_G1149	MC_05-0811.scaffold_scaffold46_orf00065	Phage tail completion protein GpR	Phage	-	156	-	5127		0	0	0	0	0	0	0	0	0	0	0	0	0	0	1	0	0	0	0	0	1	0	0	0	0	0	0	0	0	0	0	0	0	0	1	0	0	0	0	0
GI31	SAPA_G1150	MC_09-0426.scaffold_scaffold47_orf00066	Phage virion morphogenesis protein GpS	Phage	-	151	-	5128		0	0	0	0	0	0	0	0	0	0	0	0	0	0	1	0	0	0	0	0	1	0	0	0	0	0	0	0	0	0	0	0	0	0	1	0	0	0	0	0
GI31	SAPA_G1151	MC_05-0811.scaffold_scaffold46_orf00068	Phage baseplate assembly protein GpV	Phage	-	212	-	5129		0	0	0	0	0	0	0	0	0	0	0	0	0	0	1	0	0	0	0	0	1	0	0	0	0	0	0	0	0	0	0	0	0	0	1	0	0	0	0	0
GI31	SAPA_G1152	MC_05-0811.scaffold_scaffold46_orf00069	Protein 25-like lysozyme	Phage	-	116	-	5130		0	0	0	0	0	0	0	0	0	0	0	0	0	0	1	0	0	0	0	0	1	0	0	0	0	0	0	0	0	0	0	0	0	0	1	0	0	0	0	0
GI31	SAPA_G1153	MC_09-0426.scaffold_scaffold47_orf00070	Baseplate J-like protein	Phage	-	303	-	5131		0	0	0	0	0	0	0	0	0	0	0	0	0	0	1	0	0	0	0	0	1	0	0	0	0	0	0	0	0	0	0	0	0	0	1	0	0	0	0	0
GI31	SAPA_G1154	MC_05-0811.scaffold_scaffold46_orf00072	Phage P2 tail formation protein	Phage	-	204	-	5132		0	0	0	0	0	0	0	0	0	0	0	0	0	0	1	0	0	0	0	0	1	0	0	0	0	0	0	0	0	0	0	0	0	0	1	0	0	0	0	0
GI31	SAPA_G1155	t1868	putative bacteriophage tail protein	Phage	-	503	-	5133		0	0	0	0	0	0	0	0	0	0	0	0	0	0	0	0	0	0	0	0	0	0	0	0	0	0	0	0	0	0	0	0	0	0	0	0	0	0	0	0
GI31	SAPA_G1156	WR-10-02783_111212_5.remap_C2430_orf00001	Tail fiber assembly protein homolog	Phage	-	198	-	5134		0	0	0	0	0	0	0	0	0	0	0	0	0	0	1	0	0	0	0	0	1	0	0	0	0	0	0	0	0	0	0	0	0	0	0	0	0	0	0	0
GI31	SAPA_G1157	MC_08-0742.scaffold_C2389_orf00001	Phage tail assembly chaperone gp38	Phage	-	147	-	5135		0	0	0	0	0	0	0	0	0	0	0	0	0	0	1	0	0	0	0	0	1	0	0	0	0	0	0	0	0	0	0	0	0	0	0	0	0	0	0	0
GI31	SAPA_G1158	MC_05-0811.scaffold_scaffold11_orf00001	Tail fiber assembly protein	Phage	-	155	gpg	5136		0	0	0	0	0	0	0	0	0	0	0	0	0	0	0	0	0	0	0	0	0	0	0	0	0	0	0	0	0	0	0	0	0	0	0	0	0	0	0	0
GI31	SAPA_G1159	DBS_20080935_111212_2.remap_C2466_orf00002	Fels-2 prophage protein	Phage	-	243	pin	5137		0	0	0	0	0	0	0	0	0	0	0	0	0	0	0	0	0	0	0	0	0	0	0	0	0	0	0	0	0	0	0	0	0	0	1	0	0	0	0	0
GI31	SAPA_G1160	t4304	putative phage tail fiber protein	Phage	-	135	-	5138		0	0	0	0	0	0	0	0	0	0	0	0	0	0	0	0	0	0	0	0	0	0	0	0	0	0	0	0	0	0	0	0	0	0	1	0	0	0	0	0
GI31	SAPA_G1161	STM2705	Fels-2 prophage protein	Phage	-	205	-	5139		0	0	0	0	0	0	0	0	0	0	0	0	0	0	0	0	0	0	0	0	0	0	0	0	0	0	0	0	0	0	0	0	0	0	1	0	0	0	0	0
GI31	SAPA_G1162	MC_05-0811.scaffold_scaffold12_orf00003	Tail protein	Phage	-	116	-	5140		0	0	0	0	0	0	0	0	0	0	0	0	0	0	0	0	0	0	0	0	0	0	0	0	0	0	0	0	0	0	0	0	0	0	1	0	0	0	0	0
GI31	SAPA_G1163	MC_09-0426.scaffold_C2583_orf00001	Resolvase domain protein	Phage	-	198	pinH	5141		0	0	0	0	0	0	0	0	0	0	0	0	0	0	1	0	0	0	0	0	1	0	0	0	0	0	0	0	0	0	0	0	0	0	1	0	0	0	0	0
GI31	SAPA_G1164	DBS_20001356.scaffold_C2869_orf00044	Phage tail sheath protein	Phage	-	393	-	5142		0	0	0	0	0	0	0	0	0	0	0	0	0	0	1	0	0	0	0	0	1	0	0	0	0	0	0	0	0	0	0	0	0	0	1	0	0	0	0	0
GI31	SAPA_G1165	MC_09-0426.scaffold_C2583_orf00003	Major tail tube protein	Phage	-	173	-	5143		0	0	0	0	0	0	0	0	0	0	0	0	0	0	1	0	0	0	0	0	1	0	0	0	0	0	0	0	0	0	0	0	0	0	1	0	0	0	0	0
GI31	SAPA_G1166	MC_09-0426.scaffold_C2583_orf00004	Phage tail protein E	Phage	-	92	GpE	5144		0	0	0	0	0	0	0	0	0	0	0	0	0	0	1	0	0	0	0	0	1	0	0	0	0	0	0	0	0	0	0	0	0	0	1	0	0	0	0	0
GI31	SAPA_G1167	WS0301.scaffold_scaffold3_orf00037	Phage tail protein, P2 GpE family protein	Phage	-	46	-	5145		0	0	0	0	0	0	0	0	0	0	0	0	0	0	1	0	0	0	0	0	1	0	0	0	0	0	0	0	0	0	0	0	0	0	1	0	0	0	0	0
GI31	SAPA_G1168	MC_05-0811.scaffold_scaffold35_orf00012	Tail fiber protein T (Tape measure) (GpT)	Phage	-	816	GpT	5146		0	0	0	0	0	0	0	0	0	0	0	0	0	0	1	0	0	0	0	0	1	0	0	0	0	0	0	0	0	0	0	0	0	0	1	0	0	0	0	0
GI31	SAPA_G1169	MC_05-0811.scaffold_scaffold35_orf00011	GpU phage protein	Phage	-	160	gpu	5147		0	0	0	0	0	0	0	0	0	0	0	0	0	0	1	0	0	0	0	0	1	0	0	0	0	0	0	0	0	0	0	0	0	0	1	0	0	0	0	0
GI31	SAPA_G1170	MC_05-0811.scaffold_scaffold35_orf00008	Phage late control gene D protein	Phage	-	388	-	5148		0	0	0	0	0	0	0	0	0	0	0	0	0	0	1	0	0	0	0	0	1	0	0	0	0	0	0	0	0	0	0	0	0	0	1	0	0	0	0	0
GI31	SAPA_G1171	WR-10-02783_111212_5.remap_scaffold47_orf00012	Phage transcriptional activator, Ogr/Delta	Phage	-	100	ogr	5149		0	0	0	0	0	0	0	0	0	0	0	0	0	0	1	0	0	0	0	0	1	0	0	0	0	0	0	0	0	0	0	0	0	0	1	0	0	0	0	0
GI31	SAPA_G1172	0309W51997_111212_1.remap_scaffold42_orf00014	Predicted bacteriophage protein	Phage	-	144	-	5150		0	0	0	0	0	0	0	0	0	0	0	0	0	0	1	0	0	0	0	0	1	0	0	0	0	0	0	0	0	0	0	0	0	0	0	0	0	0	0	0
GI32	SAPA_G1173	WR-10-02783_111212_5.remap_scaffold5_orf00016	Putative enzyme	ICE	-	292	-	5416		0	0	0	0	0	0	0	0	0	0	0	0	0	0	0	0	0	0	0	0	1	0	0	0	0	0	0	0	0	0	0	0	0	0	0	0	0	0	0	0
GI32	SAPA_G1174	WR-10-02783_111212_5.remap_scaffold5_orf00017	Replicative DNA helicase, putative	ICE	-	457	-	5417		0	0	0	0	0	0	0	0	0	0	0	0	0	0	0	0	0	0	0	0	1	0	0	0	0	0	0	0	0	0	0	0	0	0	0	0	0	0	0	0
GI32	SAPA_G1175	WR-10-02783_111212_5.remap_scaffold5_orf00018	Putative ATP/GTP binding protein	ICE	-	565	-	5418		0	0	0	0	0	0	0	0	0	0	0	0	0	0	0	0	0	0	0	0	1	0	0	0	0	0	0	0	0	0	0	0	0	0	0	0	0	0	0	0
GI32	SAPA_G1176	WR-10-02783_111212_5.remap_scaffold5_orf00019	hypothetical protein	ICE	-	237	-	5419		0	0	0	0	0	0	0	0	0	0	0	0	0	0	0	0	0	0	0	0	1	0	0	0	0	0	0	0	0	0	0	0	0	0	0	0	0	0	0	0
GI32	SAPA_G1177	WR-10-02783_111212_5.remap_scaffold5_orf00020	hypothetical protein	ICE	-	197	-	5420		0	0	0	0	0	0	0	0	0	0	0	0	0	0	0	0	0	0	0	0	1	0	0	0	0	0	0	0	0	0	0	0	0	0	0	0	0	0	0	0
GI32	SAPA_G1178	WR-10-02783_111212_5.remap_scaffold5_orf00023	hypothetical protein	ICE	-	413	-	5421		0	0	0	0	0	0	0	0	0	0	0	0	0	0	0	0	0	0	0	0	1	0	0	0	0	0	0	0	0	0	0	0	0	0	0	0	0	0	0	0
GI32	SAPA_G1179	WR-10-02783_111212_5.remap_scaffold5_orf00026	Conserved uncharacterized protein	ICE	-	185	-	5422		0	0	0	0	0	0	0	0	0	0	0	0	0	0	0	0	0	0	0	0	1	0	0	0	0	0	0	0	0	0	0	0	0	0	0	0	0	0	0	0
GI32	SAPA_G1180	WR-10-02783_111212_5.remap_scaffold5_orf00028	Similar to DNA topoisomerase III	ICE	-	674	-	5423		0	0	0	0	0	0	0	0	0	0	0	0	0	0	0	0	0	0	0	0	1	0	0	0	0	0	0	0	0	0	0	0	0	0	0	0	0	0	0	0
GI32	SAPA_G1181	WR-10-02783_111212_5.remap_C2989_orf00001	Uncharacterized conserved protein	ICE	-	157	-	5424		0	0	0	0	0	0	0	0	0	0	0	0	0	0	0	0	0	0	0	0	1	0	0	0	0	0	0	0	0	0	0	0	0	0	0	0	0	0	0	0
GI32	SAPA_G1182	WR-10-02783_111212_5.remap_C2989_orf00002	Single-stranded DNA-binding protein	ICE	-	179	ssb	5425		0	0	0	0	0	0	0	0	0	0	0	0	0	0	0	0	0	0	0	0	1	0	0	0	0	0	0	0	0	0	0	0	0	0	0	0	0	0	0	0
GI32	SAPA_G1183	WR-10-02783_111212_5.remap_C2989_orf00003	Uncharacterized conserved protein	ICE	-	146	-	5426		0	0	0	0	0	0	0	0	0	0	0	0	0	0	0	0	0	0	0	0	1	0	0	0	0	0	0	0	0	0	0	0	0	0	0	0	0	0	0	0
GI32	SAPA_G1184	WR-10-02783_111212_5.remap_C2989_orf00004	Similar to type IV B pilus protein	ICE	G_ICEHIN1056_000310	222	-	5427		0	0	0	0	0	0	0	0	0	0	0	0	0	0	0	0	0	0	0	0	1	0	0	0	0	0	0	0	0	0	0	0	0	0	0	0	0	0	0	0
GI32	SAPA_G1185	WR-10-02783_111212_5.remap_C2989_orf00005	Putative uncharacterized protein	ICE	-	220	-	5428		0	0	0	0	0	0	0	0	0	0	0	0	0	0	0	0	0	0	0	0	1	0	0	0	0	0	0	0	0	0	0	0	0	0	0	0	0	0	0	0
GI32	SAPA_G1186	WR-10-02783_111212_5.remap_C2989_orf00006	Putative exported protein	ICE	-	241	-	5429		0	0	0	0	0	0	0	0	0	0	0	0	0	0	0	0	0	0	0	0	1	0	0	0	0	0	0	0	0	0	0	0	0	0	0	0	0	0	0	0
GI32	SAPA_G1187	WR-10-02783_111212_5.remap_C2989_orf00007	Putative lytic transglycosylase, catalytic	ICE	-	212	-	5430		0	0	0	0	0	0	0	0	0	0	0	0	0	0	0	0	0	0	0	0	1	0	0	0	0	0	0	0	0	0	0	0	0	0	0	0	0	0	0	0
GI32	SAPA_G1188	WR-10-02783_111212_5.remap_C2989_orf00008	Putative exported protein	ICE	-	178	-	5431		0	0	0	0	0	0	0	0	0	0	0	0	0	0	0	0	0	0	0	0	1	0	0	0	0	0	0	0	0	0	0	0	0	0	0	0	0	0	0	0
GI32	SAPA_G1189	WR-10-02783_111212_5.remap_C2989_orf00010	Restriction endonuclease	ICE	-	191	-	5432		0	0	0	0	0	0	0	0	0	0	0	0	0	0	0	0	0	0	0	0	1	0	0	0	0	0	0	0	0	0	0	0	0	0	0	0	0	0	0	0
GI32	SAPA_G1190	WR-10-02783_111212_5.remap_C2989_orf00011	Hypothetical protein	ICE	-	163	-	5433		0	0	0	0	0	0	0	0	0	0	0	0	0	0	0	0	0	0	0	0	1	0	0	0	0	0	0	0	0	0	0	0	0	0	0	0	0	0	0	0
GI32	SAPA_G1191	WR-10-02783_111212_5.remap_C2989_orf00012	putative plasmid transfer protein	ICE	t4cp	700	-	5434		0	0	0	0	0	0	0	0	0	0	0	0	0	0	0	0	0	0	0	0	1	0	0	0	0	0	0	0	0	0	0	0	0	0	0	0	0	0	0	0
GI32	SAPA_G1192	WR-10-02783_111212_5.remap_C2989_orf00013	Hypothetical transmembrane protein	ICE	-	253	-	5435		0	0	0	0	0	0	0	0	0	0	0	0	0	0	0	0	0	0	0	0	1	0	0	0	0	0	0	0	0	0	0	0	0	0	0	0	0	0	0	0
GI32	SAPA_G1193	WR-10-02783_111212_5.remap_C2989_orf00017	Plasmid conserved hypothetical family protein	ICE	-	116	-	5436		0	0	0	0	0	0	0	0	0	0	0	0	0	0	0	0	0	0	0	0	1	0	0	0	0	0	0	0	0	0	0	0	0	0	0	0	0	0	0	0
GI32	SAPA_G1194	WR-10-02783_111212_5.remap_C2989_orf00018	Similar to putative membrane protein	ICE	-	81	-	5437		0	0	0	0	0	0	0	0	0	0	0	0	0	0	0	0	0	0	0	0	1	0	0	0	0	0	0	0	0	0	0	0	0	0	0	0	0	0	0	0
GI32	SAPA_G1195	WR-10-02783_111212_5.remap_C2989_orf00019	Similar to putative membrane protein	ICE	-	129	-	5438		0	0	0	0	0	0	0	0	0	0	0	0	0	0	0	0	0	0	0	0	1	0	0	0	0	0	0	0	0	0	0	0	0	0	0	0	0	0	0	0
GI32	SAPA_G1196	WR-10-02783_111212_5.remap_C2989_orf00020	Putative membrane protein	ICE	-	119	-	5439		0	0	0	0	0	0	0	0	0	0	0	0	0	0	0	0	0	0	0	0	1	0	0	0	0	0	0	0	0	0	0	0	0	0	0	0	0	0	0	0
GI32	SAPA_G1197	WR-10-02783_111212_5.remap_C2989_orf00022	Putative membrane protein	ICE	G_ICEHIN1056_000410	220	-	5440		0	0	0	0	0	0	0	0	0	0	0	0	0	0	0	0	0	0	0	0	1	0	0	0	0	0	0	0	0	0	0	0	0	0	0	0	0	0	0	0
GI32	SAPA_G1198	WR-10-02783_111212_5.remap_C2989_orf00024	Putative exported protein	ICE	-	317	-	5441		0	0	0	0	0	0	0	0	0	0	0	0	0	0	0	0	0	0	0	0	1	0	0	0	0	0	0	0	0	0	0	0	0	0	0	0	0	0	0	0
GI32	SAPA_G1199	WR-10-02783_111212_5.remap_C2989_orf00025	Putative bacterial conjugation TrbI-like protein	ICE	-	500	-	5442		0	0	0	0	0	0	0	0	0	0	0	0	0	0	0	0	0	0	0	0	1	0	0	0	0	0	0	0	0	0	0	0	0	0	0	0	0	0	0	0
GI32	SAPA_G1200	WR-10-02783_111212_5.remap_C2989_orf00027	Hypothetical protein	ICE	-	108	-	5443		0	0	0	0	0	0	0	0	0	0	0	0	0	0	0	0	0	0	0	0	1	0	0	0	0	0	0	0	0	0	0	0	0	0	0	0	0	0	0	0
GI32	SAPA_G1201	WR-10-02783_111212_5.remap_C2989_orf00029	Putative lipoprotein	ICE	G_ICEHIN1056_000440	137	-	5444		0	0	0	0	0	0	0	0	0	0	0	0	0	0	0	0	0	0	0	0	1	0	0	0	0	0	0	0	0	0	0	0	0	0	0	0	0	0	0	0
GI32	SAPA_G1202	WR-10-02783_111212_5.remap_C2989_orf00030	Putative plasmid-related outer membrane ATPase	ICE	virb4	953	-	5445		0	0	0	0	0	0	0	0	0	0	0	0	0	0	0	0	0	0	0	0	1	0	0	0	0	0	0	0	0	0	0	0	0	0	0	0	0	0	0	0
GI32	SAPA_G1203	WR-10-02783_111212_5.remap_C2989_orf00032	Putative uncharacterized protein	ICE	-	126	-	5446		0	0	0	0	0	0	0	0	0	0	0	0	0	0	0	0	0	0	0	0	1	0	0	0	0	0	0	0	0	0	0	0	0	0	0	0	0	0	0	0
GI32	SAPA_G1204	WR-10-02783_111212_5.remap_C2989_orf00033	Putative exported protein	ICE	-	133	-	5447		0	0	0	0	0	0	0	0	0	0	0	0	0	0	0	0	0	0	0	0	1	0	0	0	0	0	0	0	0	0	0	0	0	0	0	0	0	0	0	0
GI32	SAPA_G1205	WR-10-02783_111212_5.remap_C2989_orf00034	Putative exported protein	ICE	G_ICEHIN1056_000520	320	-	5448		0	0	0	0	0	0	0	0	0	0	0	0	0	0	0	0	0	0	0	0	1	0	0	0	0	0	0	0	0	0	0	0	0	0	0	0	0	0	0	0
GI32	SAPA_G1206	WR-10-02783_111212_5.remap_C2989_orf00036	Putative exported protein	ICE	G_ICEHIN1056_000510	488	-	5449		0	0	0	0	0	0	0	0	0	0	0	0	0	0	0	0	0	0	0	0	1	0	0	0	0	0	0	0	0	0	0	0	0	0	0	0	0	0	0	0
GI32	SAPA_G1207	WR-10-02783_111212_5.remap_C2989_orf00038	Putative membrane protein	ICE	-	103	-	5450		0	0	0	0	0	0	0	0	0	0	0	0	0	0	0	0	0	0	0	0	1	0	0	0	0	0	0	0	0	0	0	0	0	0	0	0	0	0	0	0
GI32	SAPA_G1208	WR-10-02783_111212_5.remap_C2989_orf00040	Putative TraG-like protein	ICE	-	507	-	5451		0	0	0	0	0	0	0	0	0	0	0	0	0	0	0	0	0	0	0	0	1	0	0	0	0	0	0	0	0	0	0	0	0	0	0	0	0	0	0	0
GI32	SAPA_G1209	WR-10-02783_111212_5.remap_C2989_orf00042	DNA polymerase V subunit C	ICE	-	51	-	5452		0	0	0	0	0	0	0	0	0	0	0	0	0	0	0	0	0	0	0	0	1	0	0	0	0	0	0	0	0	0	0	0	0	0	0	0	0	0	0	0
GI32	SAPA_G1210	WR-10-02783_111212_5.remap_C2989_orf00043	Integrase/recombinase XerC, putative	ICE	-	330	xerC	5453		0	0	0	0	0	0	0	0	0	0	0	0	0	0	0	0	0	0	0	0	1	0	0	0	0	0	0	0	0	0	0	0	0	0	0	0	0	0	0	0
GI32	SAPA_G1211	WR-10-02783_111212_5.remap_C2989_orf00045	Site-specific recombinase, phage integrase family	ICE	-	709	-	5454		0	0	0	0	0	0	0	0	0	0	0	0	0	0	0	0	0	0	0	0	1	0	0	0	0	0	0	0	0	0	0	0	0	0	0	0	0	0	0	0
GI32	SAPA_G1212	WR-10-02783_111212_5.remap_C2989_orf00047	Putative exported protein	ICE	-	100	-	5455		0	0	0	0	0	0	0	0	0	0	0	0	0	0	0	0	0	0	0	0	1	0	0	0	0	0	0	0	0	0	0	0	0	0	0	0	0	0	0	0
GI32	SAPA_G1213	WR-10-02783_111212_5.remap_C2989_orf00051	Heavy metal translocating P-type ATPase	ICE	-	817	-	5456		0	0	0	0	0	0	0	0	0	0	0	0	0	0	0	0	0	0	0	0	1	0	0	0	0	0	0	0	0	0	0	0	0	0	0	0	0	0	0	0
GI32	SAPA_G1214	WR-10-02783_111212_5.remap_C2989_orf00052	Probable transcriptional regulator	ICE	-	153	-	5457		0	0	0	0	0	0	0	0	0	0	0	0	0	0	0	0	0	0	0	0	1	0	0	0	0	0	0	0	0	0	0	0	0	0	0	0	0	0	0	0
GI32	SAPA_G1215	WR-10-02783_111212_5.remap_C2989_orf00054	Arsenic resistance transcriptional regulator	ICE	-	118	arsR	5458		0	0	0	0	0	0	0	0	0	0	0	0	0	0	0	0	0	0	0	0	1	0	0	0	0	0	0	0	0	0	0	0	0	0	0	0	0	0	0	0
GI32	SAPA_G1216	WR-10-02783_111212_5.remap_C2989_orf00056	Arsenite/antimonite transporter	ICE	-	428	arsB	5459		0	0	0	0	0	0	0	0	0	0	0	0	0	0	0	0	0	0	0	0	1	0	0	0	0	0	0	0	0	0	0	0	0	0	0	0	0	0	0	0
GI32	SAPA_G1217	WR-10-02783_111212_5.remap_C2989_orf00058	PREDICTED: arsenate reductase-like	ICE	-	143	-	5460		0	0	0	0	0	0	0	0	0	0	0	0	0	0	0	0	0	0	0	0	1	0	0	0	0	0	0	0	0	0	0	0	0	0	0	0	0	0	0	0
GI32	SAPA_G1218	WR-10-02783_111212_5.remap_C2989_orf00059	Arsenical resistance protein ArsH	ICE	-	241	arsH	5461		0	0	0	0	0	0	0	0	0	0	0	0	0	0	0	0	0	0	0	0	1	0	0	0	0	0	0	0	0	0	0	0	0	0	0	0	0	0	0	0
GI32	SAPA_G1219	WR-10-02783_111212_5.remap_C2989_orf00060	ArsR family transcriptional regulator	ICE	-	112	-	5462		0	0	0	0	0	0	0	0	0	0	0	0	0	0	0	0	0	0	0	0	1	0	0	0	0	0	0	0	0	0	0	0	0	0	0	0	0	0	0	0
GI32	SAPA_G1220	WR-10-02783_111212_5.remap_C2989_orf00062	Putative membrane protein	ICE	-	411	-	5463		0	0	0	0	0	0	0	0	0	0	0	0	0	0	0	0	0	0	0	0	1	0	0	0	0	0	0	0	0	0	0	0	0	0	0	0	0	0	0	0
GI32	SAPA_G1221	WR-10-02783_111212_5.remap_C2989_orf00063	LysR-family transcriptional regulator	ICE	-	300	-	5464		0	0	0	0	0	0	0	0	0	0	0	0	0	0	0	0	0	0	0	0	1	0	0	0	0	0	0	0	0	0	0	0	0	0	0	0	0	0	0	0
GI32	SAPA_G1222	WR-10-02783_111212_5.remap_C2989_orf00064	DNA polymerase V subunit	ICE	-	147	-	5465		0	0	0	0	0	0	0	0	0	0	0	0	0	0	0	0	0	0	0	0	1	0	0	0	0	0	0	0	0	0	0	0	0	0	0	0	0	0	0	0
GI32	SAPA_G1223	WR-10-02783_111212_5.remap_C2989_orf00066	DNA polymerase V subunit UmuC	ICE	-	427	-	5466		0	0	0	0	0	0	0	0	0	0	0	0	0	0	0	0	0	0	0	0	1	0	0	0	0	0	0	0	0	0	0	0	0	0	0	0	0	0	0	0
GI32	SAPA_G1224	WR-10-02783_111212_5.remap_C2989_orf00068	DNA polymerase V subunit UmuC	ICE	-	345	-	5467		0	0	0	0	0	0	0	0	0	0	0	0	0	0	0	0	0	0	0	0	1	0	0	0	0	0	0	0	0	0	0	0	0	0	0	0	0	0	0	0
GI32	SAPA_G1225	WR-10-02783_111212_5.remap_C2989_orf00069	Similar to putative integrase	ICE	-	300	-	5468		0	0	0	0	0	0	0	0	0	0	0	0	0	0	0	0	0	0	0	0	1	0	0	0	0	0	0	0	0	0	0	0	0	0	0	0	0	0	0	0
GI32	SAPA_G1226	WR-10-02783_111212_5.remap_C2907_orf00004	Predicted ATP-dependent endonuclease of the OLD family	ICE	-	211	-	5469		0	0	0	0	0	0	0	0	0	0	0	0	0	0	0	0	0	0	0	0	1	0	0	0	0	0	0	0	0	0	0	0	0	0	0	0	0	0	0	0
GI32	SAPA_G1227	WR-10-02783_111212_5.remap_C2907_orf00007	Putative uncharacterized protein	ICE	-	117	-	5470		0	0	0	0	0	0	0	0	0	0	0	0	0	0	0	0	0	0	0	0	1	0	0	0	0	0	0	0	0	0	0	0	0	0	0	0	0	0	0	0
GI32	SAPA_G1228	WR-10-02783_111212_5.remap_C2907_orf00008	Silver-binding protein	ICE	-	144	-	5471		0	0	0	0	0	0	0	0	0	0	0	0	0	0	0	0	0	0	0	0	1	0	0	0	0	0	0	0	0	0	0	0	0	0	0	0	0	0	0	0
GI32	SAPA_G1229	WR-10-02783_111212_5.remap_C2907_orf00009	Sensor kinase CusS	ICE	-	492	-	5472		0	0	0	0	0	0	0	0	0	0	0	0	0	0	0	0	0	0	0	0	1	0	0	0	0	0	0	0	0	0	0	0	0	0	0	0	0	0	0	0
GI32	SAPA_G1230	WR-10-02783_111212_5.remap_C2907_orf00011	DNA-binding response regulator transcriptional regulator	ICE	-	227	cusR	5473		0	0	0	0	0	0	0	0	0	0	0	0	0	0	0	0	0	0	0	0	1	0	0	0	0	0	0	0	0	0	0	0	0	0	0	0	0	0	0	0
GI32	SAPA_G1231	WR-10-02783_111212_5.remap_C2907_orf00013	Efflux transporter, outer membrane factor (OMF) lipoprotein, NodT family	ICE	-	462	-	5474		0	0	0	0	0	0	0	0	0	0	0	0	0	0	0	0	0	0	0	0	1	0	0	0	0	0	0	0	0	0	0	0	0	0	0	0	0	0	0	0
GI32	SAPA_G1232	WR-10-02783_111212_5.remap_C2907_orf00014	Periplasmic copper-binding protein	ICE	-	118	-	5475		0	0	0	0	0	0	0	0	0	0	0	0	0	0	0	0	0	0	0	0	1	0	0	0	0	0	0	0	0	0	0	0	0	0	0	0	0	0	0	0
GI32	SAPA_G1233	WR-10-02783_111212_5.remap_C2907_orf00017	Efflux transporter, RND family, MFP subunit	ICE	-	377	-	5476		0	0	0	0	0	0	0	0	0	0	0	0	0	0	0	0	0	0	0	0	1	0	0	0	0	0	0	0	0	0	0	0	0	0	0	0	0	0	0	0
GI32	SAPA_G1234	WR-10-02783_111212_5.remap_C2907_orf00019	CzcA family heavy metal efflux protein	ICE	-	1049	-	5477		0	0	0	0	0	0	0	0	0	0	0	0	0	0	0	0	0	0	0	0	1	0	0	0	0	0	0	0	0	0	0	0	0	0	0	0	0	0	0	0
GI32	SAPA_G1235	WR-10-02783_111212_5.remap_C2907_orf00020	Exported protein (Silver resistance)	ICE	-	147	-	5478		0	0	0	0	0	0	0	0	0	0	0	0	0	0	0	0	0	0	0	0	1	0	0	0	0	0	0	0	0	0	0	0	0	0	0	0	0	0	0	0
GI32	SAPA_G1236	WR-10-02783_111212_5.remap_C2907_orf00021	Putative cation transporting P-type ATPase (Silver resistance)	ICE	-	814	-	5479		0	0	0	0	0	0	0	0	0	0	0	0	0	0	0	0	0	0	0	0	1	0	0	0	0	0	0	0	0	0	0	0	0	0	0	0	0	0	0	0
GI32	SAPA_G1237	WR-10-02783_111212_5.remap_C2907_orf00023	Peptidase M23B	ICE	-	246	-	5480		0	0	0	0	0	0	0	0	0	0	0	0	0	0	0	0	0	0	0	0	1	0	0	0	0	0	0	0	0	0	0	0	0	0	0	0	0	0	0	0
GI32	SAPA_G1238	WR-10-02783_111212_5.remap_C2907_orf00024	Copper resistant protein PcoE	ICE	-	86	pcoE	5481		0	0	0	0	0	0	0	0	0	0	0	0	0	0	0	0	0	0	0	0	1	0	0	0	0	0	0	0	0	0	0	0	0	0	0	0	0	0	0	0
GI32	SAPA_G1239	WR-10-02783_111212_5.remap_C2907_orf00025	twin-arginine translocation pathway signal:copper-resistance protein CopA	ICE	-	606	pcoA	5482		0	0	0	0	0	0	0	0	0	0	0	0	0	0	0	0	0	0	0	0	1	0	0	0	0	0	0	0	0	0	0	0	0	0	0	0	0	0	0	0
GI32	SAPA_G1240	WR-10-02783_111212_5.remap_C2907_orf00026	Copper resistance protein B precursor	ICE	-	297	pcoB	5483		0	0	0	0	0	0	0	0	0	0	0	0	0	0	0	0	0	0	0	0	1	0	0	0	0	0	0	0	0	0	0	0	0	0	0	0	0	0	0	0
GI32	SAPA_G1241	WR-10-02783_111212_5.remap_C2907_orf00027	Copper resistance protein C	ICE	-	113	pcoC	5484		0	0	0	0	0	0	0	0	0	0	0	0	0	0	0	0	0	0	0	0	1	0	0	0	0	0	0	0	0	0	0	0	0	0	0	0	0	0	0	0
GI32	SAPA_G1242	WR-10-02783_111212_5.remap_C2907_orf00029	Copper resistance protein D	ICE	-	310	pcoD	5485		0	0	0	0	0	0	0	0	0	0	0	0	0	0	0	0	0	0	0	0	1	0	0	0	0	0	0	0	0	0	0	0	0	0	0	0	0	0	0	0
GI32	SAPA_G1243	WR-10-02783_111212_5.remap_C2907_orf00031	Transcriptional regulatory protein pcoR	ICE	-	227	pcoR	5486		0	0	0	0	0	0	0	0	0	0	0	0	0	0	0	0	0	0	0	0	1	0	0	0	0	0	0	0	0	0	0	0	0	0	0	0	0	0	0	0
GI32	SAPA_G1244	WR-10-02783_111212_5.remap_C2907_orf00033	Probable two component-system sensor kinase involved in copper resistance	ICE	-	467	-	5487		0	0	0	0	0	0	0	0	0	0	0	0	0	0	0	0	0	0	0	0	1	0	0	0	0	0	0	0	0	0	0	0	0	0	0	0	0	0	0	0
GI32	SAPA_G1245	WR-10-02783_111212_5.remap_C2907_orf00034	Probable copper-binding protein pcoE	ICE	-	145	pcoE	5488		0	0	0	0	0	0	0	0	0	0	0	0	0	0	0	0	0	0	0	0	1	0	0	0	0	0	0	0	0	0	0	0	0	0	0	0	0	0	0	0
GI32	SAPA_G1246	WR-10-02783_111212_5.remap_scaffold71_orf00001	Hypothetical protein	ICE	-	111	-	5489		0	0	0	0	0	0	0	0	0	0	0	0	0	0	0	0	0	0	0	0	1	0	0	0	0	0	0	0	0	0	0	0	0	0	0	0	0	0	0	0
GI32	SAPA_G1247	WR-10-02783_111212_5.remap_scaffold71_orf00005	Putative uncharacterized protein	ICE	-	122	-	5490		0	0	0	0	0	0	0	0	0	0	0	0	0	0	0	0	0	0	0	0	1	0	0	0	0	0	0	0	0	0	0	0	0	0	0	0	0	0	0	0
GI32	SAPA_G1248	WR-10-02783_111212_5.remap_scaffold71_orf00006	Putative uncharacterized protein	ICE	-	216	-	5491		0	0	0	0	0	0	0	0	0	0	0	0	0	0	0	0	0	0	0	0	1	0	0	0	0	0	0	0	0	0	0	0	0	0	0	0	0	0	0	0
GI32	SAPA_G1249	WR-10-02783_111212_5.remap_scaffold71_orf00008	Putative uncharacterized protein	ICE	-	201	-	5492		0	0	0	0	0	0	0	0	0	0	0	0	0	0	0	0	0	0	0	0	1	0	0	0	0	0	0	0	0	0	0	0	0	0	0	0	0	0	0	0
GI32	SAPA_G1250	WR-10-02783_111212_5.remap_scaffold71_orf00009	Hypothetical protein	ICE	-	116	-	5493		0	0	0	0	0	0	0	0	0	0	0	0	0	0	0	0	0	0	0	0	1	0	0	0	0	0	0	0	0	0	0	0	0	0	0	0	0	0	0	0
GI32	SAPA_G1251	WR-10-02783_111212_5.remap_scaffold71_orf00010	DNA primase TraC	ICE	-	329	-	5494		0	0	0	0	0	0	0	0	0	0	0	0	0	0	0	0	0	0	0	0	1	0	0	0	0	0	0	0	0	0	0	0	0	0	0	0	0	0	0	0
GI32	SAPA_G1252	WR-10-02783_111212_5.remap_scaffold71_orf00011	Putative uncharacterized protein	ICE	-	311	-	5495		0	0	0	0	0	0	0	0	0	0	0	0	0	0	0	0	0	0	0	0	1	0	0	0	0	0	0	0	0	0	0	0	0	0	0	0	0	0	0	0
GI32	SAPA_G1253	WR-10-02783_111212_5.remap_scaffold71_orf00012	Conserved uncharacterized protein	ICE	-	228	-	5496		0	0	0	0	0	0	0	0	0	0	0	0	0	0	0	0	0	0	0	0	1	0	0	0	0	0	0	0	0	0	0	0	0	0	0	0	0	0	0	0
GI32	SAPA_G1254	WR-10-02783_111212_5.remap_scaffold71_orf00014	Helicase IV	ICE	-	503	-	5497		0	0	0	0	0	0	0	0	0	0	0	0	0	0	0	0	0	0	0	0	1	0	0	0	0	0	0	0	0	0	0	0	0	0	0	0	0	0	0	0
GI32	SAPA_G1255	WR-10-02783_111212_5.remap_scaffold71_orf00016	Helicase/Zfx / Zfy transcription activation region domain protein	ICE	MOBH	548	-	5498		0	0	0	0	0	0	0	0	0	0	0	0	0	0	0	0	0	0	0	0	1	0	0	0	0	0	0	0	0	0	0	0	0	0	0	0	0	0	0	0
GI32	SAPA_G1256	WR-10-02783_111212_5.remap_scaffold71_orf00017	Integrase family protein	ICE	-	334	-	5499		0	0	0	0	0	0	0	0	0	0	0	0	0	0	0	0	0	0	0	0	1	0	0	0	0	0	0	0	0	0	0	0	0	0	0	0	0	0	0	0
GI33	SAPA_G1257	t4518	integrase	Phage	-	421	-	5670		0	0	0	0	0	0	0	0	0	0	0	0	0	0	1	0	0	0	0	0	0	0	0	0	0	0	0	0	0	0	0	0	0	0	0	0	0	0	0	0
GI33	SAPA_G1258	0309W51997_111212_1.remap_scaffold58_orf00198	Putative uncharacterized protein	Phage	-	574	-	5671		0	0	0	0	0	0	0	0	0	0	0	0	0	0	1	0	0	0	0	0	0	0	0	0	0	0	0	0	0	0	0	0	0	0	0	0	0	0	0	0
GI33	SAPA_G1259	0309W51997_111212_1.remap_scaffold58_orf00199	Putative uncharacterized protein	Phage	-	431	-	5672		0	0	0	0	0	0	0	0	0	0	0	0	0	0	1	0	0	0	0	0	0	0	0	0	0	0	0	0	0	0	0	0	0	0	0	0	0	0	0	0
GI33	SAPA_G1260	SeAg_B4773	integrase	Phage	-	449	-	5673		1	1	1	1	1	1	1	1	1	1	1	1	1	1	0	1	1	1	1	1	1	1	1	1	1	1	1	1	1	1	1	1	1	1	1	1	1	1	1	1
GI33	SAPA_G1261	SeAg_B4775	hypothetical protein	Phage	-	212	-	5674		1	1	1	1	1	1	1	1	1	1	1	1	1	1	0	1	1	1	1	1	1	1	1	1	1	1	1	1	1	1	1	1	1	1	1	1	1	1	1	1
GI33	SAPA_G1262	SeAg_B4776	hypothetical protein	Phage	-	43	-	5675		1	1	1	1	1	1	1	1	1	1	1	1	1	1	0	1	1	1	1	1	1	1	1	1	1	1	1	1	1	1	1	1	1	1	1	1	1	1	1	1
GI33	SAPA_G1263	SeAg_B4777	conserved domain protein	Phage	-	76	-	5676		1	1	1	1	1	1	1	1	1	1	1	1	1	1	0	1	1	1	1	1	1	1	1	1	1	1	1	1	1	1	1	1	1	1	1	1	1	1	1	1
GI33	SAPA_G1264	SeAg_B4778	conserved hypothetical protein	Phage	-	61	-	5677		1	1	1	1	1	1	1	1	1	1	1	1	1	1	0	1	1	1	1	1	1	1	1	1	1	1	1	1	1	1	1	1	1	1	1	1	1	1	1	1
GI33	SAPA_G1265	SeAg_B4779	phage immunity repressor protein	Phage	-	58	-	5678		1	1	1	1	1	1	1	1	1	1	1	1	1	1	0	1	1	1	1	1	1	1	1	1	1	1	1	1	1	1	1	1	1	1	1	1	1	1	1	1
GI33	SAPA_G1266	SeAg_B4780	hypothetical protein	Phage	-	119	-	5679		1	1	1	1	1	1	1	1	1	1	1	1	1	1	0	1	1	1	1	1	1	1	1	1	1	1	1	1	1	1	1	1	1	1	1	1	1	1	1	1
GI33	SAPA_G1267	SeAg_B4781	hypothetical protein	Phage	-	50	-	5680		1	1	1	1	1	1	1	1	1	1	1	1	1	1	0	1	1	1	1	1	1	1	1	1	1	1	1	1	1	1	1	1	1	1	1	1	1	1	1	1
GI33	SAPA_G1268	SeAg_B4782	conserved hypothetical protein	Phage	-	127	-	5681		1	1	1	1	1	1	1	1	1	1	1	1	1	1	0	1	1	1	1	1	1	1	1	1	1	1	1	1	1	1	1	1	1	1	1	1	1	1	1	1
GI33	SAPA_G1269	SeAg_B4783	zinc-binding domain protein, primase-helicase family	Phage	-	890	-	5682		1	1	1	1	1	1	1	1	1	1	1	1	1	1	0	1	1	1	1	1	1	1	1	1	1	1	1	1	1	1	1	1	1	1	1	1	1	1	1	1
GI33	SAPA_G1270	SeAg_B4784	hypothetical protein	Phage	-	50	-	5683		1	1	1	1	1	1	1	1	1	1	1	1	1	1	0	1	1	1	1	1	1	1	1	1	1	1	1	1	1	1	1	1	1	1	1	1	1	1	1	1
GI33	SAPA_G1271	SeAg_B4785	putative capsid morphogenesis protein encoded in CP-933I	Phage	-	253	-	5684		1	1	1	1	1	1	1	1	1	1	1	1	1	1	0	1	1	1	1	1	1	1	1	1	1	1	1	1	1	1	1	1	1	1	1	1	1	1	1	1
GI33	SAPA_G1272	0309W51997_111212_1.remap_scaffold58_orf00210	Nucleoside triphosphatase, D5 family	Phage	-	778	-	5685		0	0	0	0	0	0	0	0	0	0	0	0	0	0	1	0	0	0	0	0	0	0	0	0	0	0	0	0	0	0	0	0	0	0	0	0	0	0	0	0
GI33	SAPA_G1273	0309W51997_111212_1.remap_scaffold58_orf00209	Putative uncharacterized protein	Phage	-	108	-	5686		0	0	0	0	0	0	0	0	0	0	0	0	0	0	1	0	0	0	0	0	0	0	0	0	0	0	0	0	0	0	0	0	0	0	0	0	0	0	0	0
GI33	SAPA_G1274	0309W51997_111212_1.remap_scaffold58_orf00207	Phage immunity repressor protein	Phage	-	64	-	5687		0	0	0	0	0	0	0	0	0	0	0	0	0	0	1	0	0	0	0	0	0	0	0	0	0	0	0	0	0	0	0	0	0	0	0	0	0	0	0	0
GI33	SAPA_G1275	0309W51997_111212_1.remap_scaffold58_orf00206	Phage transcriptional regulator, AlpA	Phage	-	56	-	5688		0	0	0	0	0	0	0	0	0	0	0	0	0	0	1	0	0	0	0	0	0	0	0	0	0	0	0	0	0	0	0	0	0	0	0	0	0	0	0	0
GI33	SAPA_G1276	0309W51997_111212_1.remap_scaffold58_orf00205	Predicted head size determination protein	Phage	-	251	-	5689		0	0	0	0	0	0	0	0	0	0	0	0	0	0	1	0	0	0	0	0	0	0	0	0	0	0	0	0	0	0	0	0	0	0	0	0	0	0	0	0
GI33	SAPA_G1277	0309W51997_111212_1.remap_scaffold58_orf00204	Phage polarity suppression protein	Phage	-	185	-	5690		0	0	0	0	0	0	0	0	0	0	0	0	0	0	1	0	0	0	0	0	0	0	0	0	0	0	0	0	0	0	0	0	0	0	0	0	0	0	0	0
GI33	SAPA_G1278	SeAg_B4786	putative activator encoded in prophage CP-933I	Phage	-	40	-	5691		1	1	1	1	1	1	1	1	1	1	1	1	1	1	1	1	1	1	1	1	1	1	1	1	1	1	1	1	1	1	1	1	1	1	1	1	1	1	1	1
GI33	SAPA_G1279	MC_09-0426.scaffold_scaffold44_orf00008	DNA processing chain A	Phage	-	327	-	5692		0	0	0	0	0	0	0	0	0	0	0	0	0	0	0	0	0	0	0	0	0	0	0	0	0	0	0	0	0	0	0	0	0	0	0	0	0	0	0	0
GI33	SAPA_G1280	MC_09-0426.scaffold_scaffold44_orf00006	Putative uncharacterized protein	Phage	-	410	-	5693		0	0	0	0	0	0	0	0	0	0	0	0	0	0	0	0	0	0	0	0	0	0	0	0	0	0	0	0	0	0	0	0	0	0	0	0	0	0	0	0
GI33	SAPA_G1281	SeAg_B4787	hypothetical protein	Phage	-	59	-	5694		1	1	1	1	1	1	1	1	1	1	1	1	1	1	0	1	1	1	1	1	1	1	1	1	1	1	1	1	1	1	1	1	1	1	1	1	1	1	1	1
GI33	SAPA_G1282	SeAg_B4788	phage tail protein E	Phage	-	103	-	5695		1	1	1	1	1	1	1	1	1	1	1	1	1	1	0	1	1	1	1	1	1	1	1	1	1	1	1	1	1	1	1	1	1	1	1	1	1	1	1	1
GI33	SAPA_G1283	SeAg_B4789	phage tail protein, P2 GpE family	Phage	-	45	-	5696		1	1	1	1	1	1	1	1	1	1	1	1	1	1	0	1	1	1	1	1	1	1	1	1	1	1	1	1	1	1	1	1	1	1	1	1	1	1	1	1
GI33	SAPA_G1284	SeAg_B4790	phage tail tape measure protein, family	Phage	-	877	-	5697		1	1	1	1	1	1	1	1	1	1	1	1	1	1	0	1	1	1	1	1	1	1	1	1	1	1	1	1	1	1	1	1	1	1	1	1	1	1	1	1
P_1	SAPA_P0001	SeAg_A0001	hypothetical protein	Plasmid	-	53	-	5826		0	1	0	0	0	0	0	0	0	0	0	0	0	0	0	0	0	0	0	0	0	0	0	0	1	0	0	0	0	0	0	0	0	0	0	0	0	0	0	0
P_1	SAPA_P0002	SeAg_A0002	hypothetical protein	Plasmid	-	78	-	5827		0	0	0	0	0	0	0	0	0	0	0	0	0	0	0	0	0	0	0	0	0	0	0	0	1	0	0	0	0	0	0	0	0	0	0	0	0	0	0	0
P_1	SAPA_P0003	SeAg_A0003	hypothetical protein	Plasmid	-	75	-	5828		0	0	0	0	0	0	0	0	0	0	0	0	0	0	0	0	0	0	0	0	0	0	0	0	1	0	0	0	0	0	0	0	0	0	0	0	0	0	0	0
P_1	SAPA_P0004	SeAg_A0004	hypothetical protein	Plasmid	-	83	-	5829		0	0	0	0	0	0	0	0	0	0	0	0	0	0	0	0	0	0	0	0	0	0	0	0	1	0	0	0	0	0	0	0	0	0	0	0	0	0	0	0
P_1	SAPA_P0005	SeAg_A0005	conserved domain protein	Plasmid	-	67	-	5830		0	0	0	0	0	0	0	0	0	0	0	0	0	0	0	0	0	0	0	0	0	0	0	0	1	0	0	0	0	0	0	0	0	0	0	0	0	0	0	0
P_1	SAPA_P0006	SeAg_A0006	hypothetical protein	Plasmid	-	131	-	5831		0	0	0	0	0	0	0	0	0	0	0	0	0	0	0	0	0	0	0	0	0	0	0	0	1	0	0	0	0	0	0	0	0	0	0	0	0	0	0	0
P_1	SAPA_P0007	SeAg_A0007	conserved hypothetical protein	Plasmid	-	147	-	5832		0	1	0	0	0	0	0	0	0	0	0	0	0	0	0	0	0	0	0	0	0	0	0	0	1	0	0	0	0	0	0	0	0	0	0	0	0	0	0	0
P_1	SAPA_P0008	SeAg_A0008	hypothetical protein	Plasmid	-	137	-	5833		0	0	0	0	0	0	0	0	0	0	0	0	0	0	0	0	0	0	0	0	0	0	0	0	1	0	0	0	0	0	0	0	0	0	0	0	0	0	0	0
P_1	SAPA_P0009	SeAg_A0009	conserved hypothetical protein	Plasmid	-	95	-	5834		0	1	0	0	0	0	0	0	0	0	0	0	0	0	0	0	0	0	0	0	0	0	0	0	1	0	0	0	0	0	0	0	0	0	0	0	0	0	0	0
P_1	SAPA_P0010	SeAg_A0010	conserved hypothetical protein	Plasmid	-	52	-	5835		0	1	0	0	0	0	0	0	0	0	0	0	0	0	0	0	0	0	0	0	0	0	0	0	1	0	0	0	0	0	0	0	0	0	0	0	0	0	0	0
P_1	SAPA_P0011	SeAg_A0011	protein ParB	Plasmid	-	166	-	5836		0	1	0	0	0	0	0	0	0	0	0	0	0	0	0	0	0	0	0	0	0	0	0	0	1	0	0	0	0	0	0	0	0	0	0	0	0	0	0	0
P_1	SAPA_P0012	SeAg_A0012	conserved hypothetical protein	Plasmid	-	71	-	5837		0	1	0	0	0	0	0	0	0	0	0	0	0	0	0	0	0	0	0	0	0	0	0	0	1	0	0	0	0	0	0	0	0	0	0	0	0	0	0	0
P_1	SAPA_P0013	SeAg_A0013	hypothetical protein	Plasmid	-	113	-	5838		0	1	0	0	0	0	0	0	0	0	0	0	0	0	0	0	0	0	0	0	0	0	0	0	1	0	0	0	0	0	0	0	0	0	0	0	0	0	0	0
P_1	SAPA_P0014	SeAg_A0014	conserved hypothetical protein	Plasmid	-	67	-	5839		0	0	0	0	0	0	0	0	0	0	0	0	0	0	0	0	0	0	0	0	0	0	0	0	1	0	0	0	0	0	0	0	0	0	0	0	0	0	0	0
P_1	SAPA_P0015	SeAg_A0015	hypothetical protein	Plasmid	-	189	-	5840		0	1	0	0	0	0	0	0	0	0	0	0	0	0	0	0	0	0	0	0	0	0	0	0	1	0	0	0	0	0	0	0	0	0	0	0	0	0	0	0
P_1	SAPA_P0016	SeAg_A0016	zinc metalloproteinase Mpr protein	Plasmid	-	273	-	5841		0	1	0	0	0	0	0	0	0	0	0	0	0	0	0	0	0	0	0	0	0	0	0	0	1	0	0	0	0	0	0	0	0	0	0	0	0	0	0	0
P_1	SAPA_P0017	MC_05-0632_batch3.remap_C4159_orf00001	Hypothetical protein	Plasmid	-	104	-	5842		0	1	0	0	0	0	0	0	0	0	0	0	0	0	0	0	0	0	0	0	0	0	0	0	0	0	0	0	0	0	0	0	0	0	0	0	0	0	0	0
P_1	SAPA_P0018	SeAg_A0017	conserved hypothetical protein	Plasmid	-	97	-	5843		0	0	0	0	0	0	0	0	0	0	0	0	0	0	0	0	0	0	0	0	0	0	0	0	1	0	0	0	0	0	0	0	0	0	0	0	0	0	0	0
P_1	SAPA_P0019	SeAg_A0018	conserved hypothetical protein	Plasmid	-	112	-	5844		0	1	0	0	0	0	0	0	0	0	0	0	0	0	0	0	0	0	0	0	0	0	0	0	1	0	0	0	0	0	0	0	0	0	0	0	0	0	0	0
P_1	SAPA_P0020	SeAg_A0019	H-NS histone family	Plasmid	-	141	-	5845		0	1	0	0	0	0	0	0	0	0	0	0	0	0	0	0	0	0	0	0	0	0	0	0	1	0	0	0	0	0	0	0	0	0	0	0	0	0	0	0
P_1	SAPA_P0021	SeAg_A0020	topoisomerase	Plasmid	-	726	-	5846		0	1	0	0	0	0	0	0	0	0	0	0	0	0	0	0	0	0	0	0	0	0	0	0	1	0	0	0	0	0	0	0	0	0	0	0	0	0	0	0
P_1	SAPA_P0022	SeAg_A0021	hypothetical protein	Plasmid	-	133	-	5847		0	1	0	0	0	0	0	0	0	0	0	0	0	0	0	0	0	0	0	0	0	0	0	0	1	0	0	0	0	0	0	0	0	0	0	0	0	0	0	0
P_1	SAPA_P0023	SeAg_A0022	YggA protein	Plasmid	-	121	-	5848		0	1	0	0	0	0	0	0	0	0	0	0	0	0	0	0	0	0	0	0	0	0	0	0	1	0	0	0	0	0	0	0	0	0	0	0	0	0	0	0
P_1	SAPA_P0024	SeAg_A0023	conjugal transfer protein	Plasmid	t4cp	673	-	5849		0	1	0	0	0	0	0	0	0	0	0	0	0	0	0	0	0	0	0	0	0	0	0	0	1	0	0	0	0	0	0	0	0	0	0	0	0	0	0	0
P_1	SAPA_P0025	SeAg_A0024	P-type DNA transfer ATPase VirB11	Plasmid	T_virB11	353	virB	5850		0	1	0	0	0	0	0	0	0	0	0	0	0	0	0	0	0	0	0	0	0	0	0	0	1	0	0	0	0	0	0	0	0	0	0	0	0	0	0	0
P_1	SAPA_P0026	SeAg_A0025	conjugal transfer protein	Plasmid	-	408	-	5851		0	1	0	0	0	0	0	0	0	0	0	0	0	0	0	0	0	0	0	0	0	0	0	0	1	0	0	0	0	0	0	0	0	0	0	0	0	0	0	0
P_1	SAPA_P0027	SeAg_A0026	conjugal transfer outer membrane protein	Plasmid	T_virB9	262	-	5852		0	1	0	0	0	0	0	0	0	0	0	0	0	0	0	0	0	0	0	0	0	0	0	0	1	0	0	0	0	0	0	0	0	0	0	0	0	0	0	0
P_1	SAPA_P0028	SeAg_A0027	conjugal transfer protein	Plasmid	T_virB8	263	-	5853		0	1	0	0	0	0	0	0	0	0	0	0	0	0	0	0	0	0	0	0	0	0	0	0	1	0	0	0	0	0	0	0	0	0	0	0	0	0	0	0
P_1	SAPA_P0029	SeAg_A0028	conserved domain protein	Plasmid	-	57	-	5854		0	1	0	0	0	0	0	0	0	0	0	0	0	0	0	0	0	0	0	0	0	0	0	0	1	0	0	0	0	0	0	0	0	0	0	0	0	0	0	0
P_1	SAPA_P0030	SeAg_A0029	putative conjugal transfer protein	Plasmid	-	217	-	5855		0	1	0	0	0	0	0	0	0	0	0	0	0	0	0	0	0	0	0	0	0	0	0	0	1	0	0	0	0	0	0	0	0	0	0	0	0	0	0	0
P_1	SAPA_P0031	SeAg_A0030	conjugal transfer protein	Plasmid	virb4	841	-	5856		0	1	0	0	0	0	0	0	0	0	0	0	0	0	0	0	0	0	0	0	0	0	0	0	1	0	0	0	0	0	0	0	0	0	0	0	0	0	0	0
P_1	SAPA_P0032	SeAg_A0031	hypothetical protein	Plasmid	T_virB3	132	-	5857		0	1	0	0	0	0	0	0	0	0	0	0	0	0	0	0	0	0	0	0	0	0	0	0	1	0	0	0	0	0	0	0	0	0	0	0	0	0	0	0
P_1	SAPA_P0033	SeAg_A0032	conserved hypothetical protein	Plasmid	-	105	-	5858		0	1	0	0	0	0	0	0	0	0	0	0	0	0	0	0	0	0	0	0	0	0	0	0	1	0	0	0	0	0	0	0	0	0	0	0	0	0	0	0
P_1	SAPA_P0034	SeAg_A0033	conjugal transfer protein	Plasmid	-	225	-	5859		0	1	0	0	0	0	0	0	0	0	0	0	0	0	0	0	0	0	0	0	0	0	0	0	1	0	0	0	0	0	0	0	0	0	0	0	0	0	0	0
P_1	SAPA_P0035	SeAg_A0034	hypothetical protein	Plasmid	-	136	-	5860		0	1	0	0	0	0	0	0	0	0	0	0	0	0	0	0	0	0	0	0	0	0	0	0	1	0	0	0	0	0	0	0	0	0	0	0	0	0	0	0
P_1	SAPA_P0036	SeAg_A0035	hypothetical protein	Plasmid	-	167	-	5861		0	1	0	0	0	0	0	0	0	0	0	0	0	0	0	0	0	0	0	0	0	0	0	0	1	0	0	0	0	0	0	0	0	0	0	0	0	0	0	0
P_1	SAPA_P0037	SeAg_A0036	plasmid replication protein	Plasmid	-	354	-	5862		0	1	0	0	0	0	0	0	0	0	0	0	0	0	0	0	0	0	0	0	0	0	0	0	1	0	0	0	0	0	0	0	0	0	0	0	0	0	0	0
P_1	SAPA_P0038	SeAg_A0037	conserved hypothetical protein	Plasmid	-	82	-	5863		0	1	0	0	0	0	0	0	0	0	0	0	0	0	0	0	0	0	0	0	0	0	0	0	1	0	0	0	0	0	0	0	0	0	0	0	0	0	0	0
P_1	SAPA_P0039	SeAg_A0038	putative conjugal transfer protein	Plasmid	T_virB6	350	-	5864		0	1	0	0	0	0	0	0	0	0	0	0	0	0	0	0	0	0	0	0	0	0	0	0	1	0	0	0	0	0	0	0	0	0	0	0	0	0	0	0
P_1	SAPA_P0040	SeAg_A0039	hypothetical protein	Plasmid	-	193	-	5865		0	1	0	0	0	0	0	0	0	0	0	0	0	0	0	0	0	0	0	0	0	0	0	0	1	0	0	0	0	0	0	0	0	0	0	0	0	0	0	0
P_1	SAPA_P0041	SeAg_A0040	hypothetical protein	Plasmid	-	85	-	5866		0	1	0	0	0	0	0	0	0	0	0	0	0	0	0	0	0	0	0	0	0	0	0	0	1	0	0	0	0	0	0	0	0	0	0	0	0	0	0	0
P_1	SAPA_P0042	SeAg_A0041	hypothetical protein	Plasmid	-	51	-	5867		0	1	0	0	0	0	0	0	0	0	0	0	0	0	0	0	0	0	0	0	0	0	0	0	1	0	0	0	0	0	0	0	0	0	0	0	0	0	0	0
P_1	SAPA_P0043	SeAg_A0042	conserved hypothetical protein	Plasmid	-	108	-	5868		0	1	0	0	0	0	0	0	0	0	0	0	0	0	0	0	0	0	0	0	0	0	0	0	1	0	0	0	0	0	0	0	0	0	0	0	0	0	0	0
P_1	SAPA_P0044	SeAg_A0043	conserved hypothetical protein	Plasmid	-	326	-	5869		0	1	0	0	0	0	0	0	0	0	0	0	0	0	0	0	0	0	0	0	0	0	0	0	1	0	0	0	0	0	0	0	0	0	0	0	0	0	0	0
P_1	SAPA_P0045	SeAg_A0044	hypothetical protein	Plasmid	-	232	-	5870		0	1	0	0	0	0	0	0	0	0	0	0	0	0	0	0	0	0	0	0	0	0	0	0	1	0	0	0	0	0	0	0	0	0	0	0	0	0	0	0
P_1	SAPA_P0046	SeAg_A0045	hypothetical protein	Plasmid	-	91	-	5871		0	1	0	0	0	0	0	0	0	0	0	0	0	0	0	0	0	0	0	0	0	0	0	0	1	0	0	0	0	0	0	0	0	0	0	0	0	0	0	0
P_1	SAPA_P0047	SeAg_A0046	hypothetical protein	Plasmid	-	117	-	5872		0	1	0	0	0	0	0	0	0	0	0	0	0	0	0	0	0	0	0	0	0	0	0	0	1	0	0	0	0	0	0	0	0	0	0	0	0	0	0	0
P_1	SAPA_P0048	SeAg_A0047	hypothetical protein	Plasmid	-	185	-	5873		0	1	0	0	0	0	0	0	0	0	0	0	0	0	0	0	0	0	0	0	0	0	0	0	1	0	0	0	0	0	0	0	0	0	0	0	0	0	0	0
P_1	SAPA_P0049	SeAg_A0048	TraL	Plasmid	-	268	-	5874		0	1	0	0	0	0	0	0	0	0	0	0	0	0	0	0	0	0	0	0	0	0	0	0	1	0	0	0	0	0	0	0	0	0	0	0	0	0	0	0
P_1	SAPA_P0050	SeAg_A0049	hypothetical protein	Plasmid	-	142	-	5875		0	0	0	0	0	0	0	0	0	0	0	0	0	0	0	0	0	0	0	0	0	0	0	0	1	0	0	0	0	0	0	0	0	0	0	0	0	0	0	0
P_1	SAPA_P0051	SeAg_A0050	conserved hypothetical protein	Plasmid	-	129	-	5876		0	1	0	0	0	0	0	0	0	0	0	0	0	0	0	0	0	0	0	0	0	0	0	0	1	0	0	0	0	0	0	0	0	0	0	0	0	0	0	0
P_1	SAPA_P0052	SeAg_A0051	relaxase	Plasmid	MOBP	1201	-	5877		0	1	0	0	0	0	0	0	0	0	0	0	0	0	0	0	0	0	0	0	0	0	0	0	1	0	0	0	0	0	0	0	0	0	0	0	0	0	0	0
P_1	SAPA_P0053	SeAg_A0052	hypothetical protein	Plasmid	-	70	-	5878		0	0	0	0	0	0	0	0	0	0	0	0	0	0	0	0	0	0	0	0	0	0	0	0	1	0	0	0	0	0	0	0	0	0	0	0	0	0	0	0
P_1	SAPA_P0054	SeAg_A0053	conserved hypothetical protein	Plasmid	-	70	-	5879		0	0	0	0	0	0	0	0	0	0	0	0	0	0	0	0	0	0	0	0	0	0	0	0	1	0	0	0	0	0	0	0	0	0	0	0	0	0	0	0
P_2	SAPA_P0055	MC_08-0532.scaffold_C3079_orf00001	Conserved domain protein	Plasmid	-	129	stbA	5881		0	0	0	0	0	0	0	0	0	0	0	0	0	0	0	0	0	0	0	1	0	0	0	0	0	0	0	0	0	0	0	0	0	0	0	0	0	0	0	0
P_2	SAPA_P0056	MC_08-0532.scaffold_scaffold3_orf00004	Sch_170	Plasmid	-	725	-	5882		0	0	0	0	0	0	0	0	0	0	0	0	0	0	0	0	0	0	0	1	0	0	0	0	0	0	0	0	0	0	0	0	0	0	0	0	0	0	0	0
P_2	SAPA_P0057	MC_08-0532.scaffold_scaffold3_orf00005	EstP	Plasmid	-	859	estP	5883		0	0	0	0	0	0	0	0	0	0	0	0	0	0	0	0	0	0	0	1	0	0	0	0	0	0	0	0	0	0	0	0	0	0	0	0	0	0	0	0
P_2	SAPA_P0059	MC_08-0532.scaffold_scaffold3_orf00008	Putative membrane protein	Plasmid	-	463	-	5885		0	0	0	0	0	0	0	0	0	0	0	0	0	0	0	0	0	0	0	1	0	0	0	0	0	0	0	0	0	0	0	0	0	0	0	0	0	0	0	0
P_2	SAPA_P0060	MC_08-0532.scaffold_scaffold3_orf00009	MarR family transcriptional regulator	Plasmid	-	118	-	5886		0	0	0	0	0	0	0	0	0	0	0	0	0	0	0	0	0	0	0	1	0	0	0	0	0	0	0	0	0	0	0	0	0	0	0	0	0	0	0	0
P_2	SAPA_P0061	MC_08-0532.scaffold_scaffold3_orf00010	Oxidoreductase, aldo/keto reductase family	Plasmid	-	337	-	5887		0	0	0	0	0	0	0	0	0	0	0	0	0	0	0	0	0	0	0	1	0	0	0	0	0	0	0	0	0	0	0	0	0	0	0	0	0	0	0	0
P_2	SAPA_P0062	MC_08-0532.scaffold_scaffold3_orf00012	Formamidase	Plasmid	-	168	amiF	5888		0	0	0	0	0	0	0	0	0	0	0	0	0	0	0	0	0	0	0	1	0	0	0	0	0	0	0	0	0	0	0	0	0	0	0	0	0	0	0	0
P_2	SAPA_P0063	MC_08-0532.scaffold_scaffold22_orf00036	Urocanate hydratase	Plasmid	-	61	-	5889		0	0	0	0	0	0	0	0	0	0	0	0	0	0	0	0	0	0	0	1	0	0	0	0	0	0	0	0	0	0	0	0	0	0	0	0	0	0	0	0
P_2	SAPA_P0064	MC_08-0532.scaffold_scaffold22_orf00032	Heme ABC exporter, ATP-binding protein CcmA	Plasmid	-	208	ccmA	5890		0	0	0	0	0	0	0	0	0	0	0	0	0	0	0	0	0	0	0	1	0	0	0	0	0	0	0	0	0	0	0	0	0	0	0	0	0	0	0	0
P_2	SAPA_P0065	MC_08-0532.scaffold_scaffold22_orf00031	Heme exporter protein CcmB	Plasmid	-	220	ccmB	5891		0	0	0	0	0	0	0	0	0	0	0	0	0	0	0	0	0	0	0	1	0	0	0	0	0	0	0	0	0	0	0	0	0	0	0	0	0	0	0	0
P_2	SAPA_P0066	MC_08-0532.scaffold_scaffold22_orf00030	Heme exporter protein	Plasmid	-	249	ccmC	5892		0	0	0	0	0	0	0	0	0	0	0	0	0	0	0	0	0	0	0	1	0	0	0	0	0	0	0	0	0	0	0	0	0	0	0	0	0	0	0	0
P_2	SAPA_P0067	MC_08-0532.scaffold_scaffold22_orf00029	Heme exporter protein CcmD	Plasmid	-	75	ccmD	5893		0	0	0	0	0	0	0	0	0	0	0	0	0	0	0	0	0	0	0	1	0	0	0	0	0	0	0	0	0	0	0	0	0	0	0	0	0	0	0	0
P_2	SAPA_P0068	MC_08-0532.scaffold_scaffold22_orf00028	Cytochrome c-type biogenesis protein CcmE	Plasmid	-	145	ccmE	5894		0	0	0	0	0	0	0	0	0	0	0	0	0	0	0	0	0	0	0	1	0	0	0	0	0	0	0	0	0	0	0	0	0	0	0	0	0	0	0	0
P_2	SAPA_P0069	MC_08-0532.scaffold_scaffold22_orf00025	Periplasmic protein thiol:disulfide oxidoreductase, DsbE family protein	Plasmid	-	186	dsbE	5895		0	0	0	0	0	0	0	0	0	0	0	0	0	0	0	0	0	0	0	1	0	0	0	0	0	0	0	0	0	0	0	0	0	0	0	0	0	0	0	0
P_2	SAPA_P0070	MC_08-0532.scaffold_scaffold22_orf00023	Cytochrome C-type biogenesis protein	Plasmid	-	289	ccmI	5896		0	0	0	0	0	0	0	0	0	0	0	0	0	0	0	0	0	0	0	1	0	0	0	0	0	0	0	0	0	0	0	0	0	0	0	0	0	0	0	0
P_2	SAPA_P0071	MC_08-0532.scaffold_scaffold22_orf00021	Trimethylamine-N-oxide reductase c-type cytochrome TorC	Plasmid	-	388	torY	5897		0	0	0	0	0	0	0	0	0	0	0	0	0	0	0	0	0	0	0	1	0	0	0	0	0	0	0	0	0	0	0	0	0	0	0	0	0	0	0	0
P_2	SAPA_P0072	MC_08-0532.scaffold_scaffold22_orf00019	Trimethylamine-N-oxide reductase 2	Plasmid	-	840	torZ	5898		0	0	0	0	0	0	0	0	0	0	0	0	0	0	0	0	0	0	0	1	0	0	0	0	0	0	0	0	0	0	0	0	0	0	0	0	0	0	0	0
P_2	SAPA_P0073	MC_08-0532.scaffold_scaffold22_orf00014	Pyridoxal phosphate-dependent enzyme, D-cysteine desulfhydrase family	Plasmid	-	332	yedO	5899		0	0	0	0	0	0	0	0	0	0	0	0	0	0	0	0	0	0	0	1	0	0	0	0	0	0	0	0	0	0	0	0	0	0	0	0	0	0	0	0
P_2	SAPA_P0076	MC_08-0532.scaffold_scaffold22_orf00011	Virulence-associated VagD-like protein	Plasmid	-	132	vagD	5902		0	0	0	0	0	0	0	0	0	0	0	0	0	0	0	0	0	0	0	1	0	0	0	0	0	0	0	0	0	0	0	0	0	0	0	0	0	0	0	0
P_2	SAPA_P0077	MC_08-0532.scaffold_scaffold22_orf00010	Virulence-associated protein vagC	Plasmid	-	77	vagC	5903		0	0	0	0	0	0	0	0	0	0	0	0	0	0	0	0	0	0	0	1	0	0	0	0	0	0	0	0	0	0	0	0	0	0	0	0	0	0	0	0
P_2	SAPA_P0078	MC_08-0532.scaffold_scaffold22_orf00005	DNA replication	Plasmid	-	276	repB	5904		0	0	0	0	0	0	0	0	0	0	0	0	0	0	0	0	0	0	0	1	0	0	0	0	0	0	0	0	0	0	0	0	0	0	0	0	0	0	0	0
P_2	SAPA_P0079	MC_08-0532.scaffold_scaffold22_orf00004	Plasmid partition protein A	Plasmid	-	402	parA	5905		0	0	0	0	0	0	0	0	0	0	0	0	0	0	0	0	0	0	0	1	0	0	0	0	0	0	0	0	0	0	0	0	0	0	0	0	0	0	0	0
P_2	SAPA_P0080	PSLT053	plasmid partition protein B	Plasmid	-	325	parB	5906		0	0	0	0	0	0	0	0	0	0	0	0	0	0	0	0	0	0	0	1	0	0	0	0	0	0	0	0	0	0	0	0	0	0	0	0	0	0	0	0
P_2	SAPA_P0081	MC_08-0532.scaffold_scaffold16_orf00003	Putative uncharacterized protein	Plasmid	-	309	-	5907		0	0	0	0	0	0	0	0	0	0	0	0	0	0	0	0	0	0	0	1	0	0	0	0	0	0	0	0	0	0	0	0	0	0	0	0	0	0	0	0
P_2	SAPA_P0082	MC_08-0532.scaffold_scaffold16_orf00004	Putative uncharacterized protein	Plasmid	-	200	-	5908		0	0	0	0	0	0	0	0	0	0	0	0	0	0	0	0	0	0	0	1	0	0	0	0	0	0	0	0	0	0	0	0	0	0	0	0	0	0	0	0
P_2	SAPA_P0083	MC_08-0532.scaffold_scaffold16_orf00005	Putative cytoplasmic protein	Plasmid	-	45	-	5909		0	0	0	0	0	0	0	0	0	0	0	0	0	0	0	0	0	0	0	1	0	0	0	0	0	0	0	0	0	0	0	0	0	0	0	0	0	0	0	0
P_2	SAPA_P0084	MC_08-0532.scaffold_scaffold16_orf00007	Putative ATPase (Modular protein)	Plasmid	-	1226	-	5910		0	0	0	0	0	0	0	0	0	0	0	0	0	0	0	0	0	0	0	1	0	0	0	0	0	0	0	0	0	0	0	0	0	0	0	0	0	0	0	0
P_2	SAPA_P0085	MC_08-0532.scaffold_scaffold16_orf00008	Putative uncharacterized protein	Plasmid	-	588	-	5911		0	0	0	0	0	0	0	0	0	0	0	0	0	0	0	0	0	0	0	1	0	0	0	0	0	0	0	0	0	0	0	0	0	0	0	0	0	0	0	0
P_2	SAPA_P0086	MC_08-0532.scaffold_scaffold16_orf00010	Type II restriction enzyme	Plasmid	-	1230	-	5912		0	0	0	0	0	0	0	0	0	0	0	0	0	0	0	0	0	0	0	1	0	0	0	0	0	0	0	0	0	0	0	0	0	0	0	0	0	0	0	0
P_2	SAPA_P0087	MC_08-0532.scaffold_scaffold16_orf00011	Putative uncharacterized protein	Plasmid	-	886	-	5913		0	0	0	0	0	0	0	0	0	0	0	0	0	0	0	0	0	0	0	1	0	0	0	0	0	0	0	0	0	0	0	0	0	0	0	0	0	0	0	0
P_2	SAPA_P0088	MC_08-0532.scaffold_scaffold16_orf00012	Putative ATP-dependent Lon protease	Plasmid	-	692	-	5914		0	0	0	0	0	0	0	0	0	0	0	0	0	0	0	0	0	0	0	1	0	0	0	0	0	0	0	0	0	0	0	0	0	0	0	0	0	0	0	0
P_2	SAPA_P0091	MC_08-0532.scaffold_scaffold16_orf00015	Integrase core domain protein	Plasmid	-	86	-	5917		0	0	0	0	0	0	0	0	0	0	0	0	0	0	0	0	0	0	0	1	0	0	0	0	0	0	0	0	0	0	0	0	0	0	0	0	0	0	0	0
P_2	SAPA_P0093	MC_08-0532.scaffold_scaffold16_orf00019	Virulence-associated VagD-like protein	Plasmid	-	139	vagD	5919		0	0	0	0	0	0	0	0	0	0	0	0	0	0	0	0	0	0	0	1	0	0	0	0	0	0	0	0	0	0	0	0	0	0	0	0	0	0	0	0
P_2	SAPA_P0094	MC_08-0532.scaffold_scaffold16_orf00020	Virulence-associated VagC-like protein	Plasmid	-	77	vagC	5920		0	0	0	0	0	0	0	0	0	0	0	0	0	0	0	0	0	0	0	1	0	0	0	0	0	0	0	0	0	0	0	0	0	0	0	0	0	0	0	0
P_2	SAPA_P0095	MC_08-0532.scaffold_scaffold16_orf00021	CcdA protein	Plasmid	-	73	ccdA	5921		0	0	0	0	0	0	0	0	0	0	0	0	0	0	0	0	0	0	0	1	0	0	0	0	0	0	0	0	0	0	0	0	0	0	0	0	0	0	0	0
P_2	SAPA_P0096	MC_08-0532.scaffold_scaffold16_orf00022	Gyrase inhibitor	Plasmid	-	102	letB	5922		0	0	0	0	0	0	0	0	0	0	0	0	0	0	0	0	0	0	0	1	0	0	0	0	0	0	0	0	0	0	0	0	0	0	0	0	0	0	0	0
P_2	SAPA_P0097	MC_08-0532.scaffold_scaffold16_orf00023	Putative uncharacterized protein	Plasmid	-	339	-	5923		0	0	0	0	0	0	0	0	0	0	0	0	0	0	0	0	0	0	0	1	0	0	0	0	0	0	0	0	0	0	0	0	0	0	0	0	0	0	0	0
P_2	SAPA_P0098	WS1035.scaffold_scaffold4_orf00017	Site-specific recombinase, phage integrase family	Plasmid	-	262	-	5924		0	0	0	0	0	0	0	0	0	0	0	0	0	0	0	0	0	0	0	1	0	0	0	0	0	0	0	0	0	0	0	0	0	0	0	0	0	0	0	0
P_2	SAPA_P0099	MC_08-0532.scaffold_scaffold16_orf00026	Par-like protein	Plasmid	-	60	-	5925		0	0	0	0	0	0	0	0	0	0	0	0	0	0	0	0	0	0	0	1	0	0	0	0	0	0	0	0	0	0	0	0	0	0	0	0	0	0	0	0
P_2	SAPA_P0100	MC_08-0532.scaffold_scaffold16_orf00027	Plasmid segregation oscillating ATPase ParF	Plasmid	-	46	-	5926		0	0	0	0	0	0	0	0	0	0	0	0	0	0	0	0	0	0	0	1	0	0	0	0	0	0	0	0	0	0	0	0	0	0	0	0	0	0	0	0
P_2	SAPA_P0101	MC_08-0532.scaffold_scaffold16_orf00028	RepA	Plasmid	-	292	repA	5927		0	0	0	0	0	0	0	0	0	0	0	0	0	0	0	0	0	0	0	1	0	0	0	0	0	0	0	0	0	0	0	0	0	0	0	0	0	0	0	0
P_2	SAPA_P0102	DBS_20060793_111212_1.remap_C2554_orf00001	ImpA-like protein; UV protection	Plasmid	-	144	impA	5928		0	0	0	0	0	0	0	0	0	0	0	0	0	0	0	0	0	0	0	1	0	0	0	0	0	0	0	0	0	0	0	0	0	0	0	0	0	0	0	0
P_2	SAPA_P0103	MC_08-0532.scaffold_C3153_orf00003	Putative reverse transcriptase	Plasmid	-	495	-	5929		0	0	0	0	0	0	0	0	0	0	0	0	0	0	0	0	0	0	0	1	0	0	0	0	0	0	0	0	0	0	0	0	0	0	0	0	0	0	0	0
P_2	SAPA_P0104	MC_08-0532.scaffold_scaffold48_orf00001	RepA	Plasmid	-	43	-	5930		0	0	0	0	0	0	0	0	0	0	0	0	0	0	0	0	0	0	0	1	0	0	0	0	0	0	0	0	0	0	0	0	0	0	0	0	0	0	0	0
P_3	SAPA_P0105	MC_04-0873.scaffold_scaffold27_orf00001	PilS type IV prepilin	Plasmid	-	111	-	5941		0	1	1	0	0	1	1	1	0	0	0	0	0	0	0	0	0	0	0	0	0	0	0	0	0	0	0	0	0	1	0	1	0	0	0	0	0	0	0	0
P_3	SAPA_P0106	MC_04-0873.scaffold_scaffold27_orf00002	Integral membrane protein	Plasmid	-	366	-	5942		0	1	1	0	0	1	1	1	0	0	0	0	0	0	0	0	0	0	0	0	0	0	0	0	0	0	0	0	0	1	0	1	0	0	0	0	0	0	0	0
P_3	SAPA_P0107	MC_04-0873.scaffold_scaffold27_orf00003	Nucleotide-binding protein	Plasmid	-	518	-	5943		0	1	1	0	0	1	1	1	0	0	0	0	0	0	0	0	0	0	0	0	0	0	0	0	0	0	0	0	0	1	0	1	0	0	0	0	0	0	0	0
P_3	SAPA_P0108	MC_05-0784.scaffold_scaffold21_orf00124	Type IV pilus biogenesis protein PilP	Plasmid	-	151	pilP	5944		0	1	1	0	0	1	1	1	0	0	0	0	0	0	0	0	0	0	0	0	0	0	0	0	0	0	0	0	0	1	0	1	0	0	0	0	0	0	0	0
P_3	SAPA_P0109	MC_05-0784.scaffold_scaffold21_orf00123	Pilin accessory family protein	Plasmid	-	432	PilO	5945		0	1	1	0	0	1	1	1	0	0	0	0	0	0	0	0	0	0	0	0	0	0	0	0	0	0	0	0	0	1	0	1	0	0	0	0	0	0	0	0
P_3	SAPA_P0110	MC_05-0784.scaffold_scaffold21_orf00121	Lipoprotein	Plasmid	-	561	-	5946		0	1	1	0	0	1	1	1	0	0	0	0	0	0	0	0	0	0	0	0	0	0	0	0	0	0	0	0	0	1	0	1	0	0	0	0	0	0	0	0
P_3	SAPA_P0111	MC_04-0873.scaffold_scaffold27_orf00011	Lipoprotein (PilL protein)	Plasmid	-	356	-	5947		0	1	1	0	0	1	1	1	0	0	0	0	0	0	0	0	0	0	0	0	0	0	0	0	0	0	0	0	0	1	0	1	0	0	0	0	0	0	0	0
P_3	SAPA_P0112	MC_04-0873.scaffold_scaffold27_orf00012	PilJ protein	Plasmid	-	151	PilJ	5948		0	0	0	0	0	0	0	0	0	0	0	0	0	0	0	0	0	0	0	0	0	0	0	0	0	0	0	0	0	1	0	1	0	0	0	0	0	0	0	0
P_3	SAPA_P0113	MC_04-0873.scaffold_scaffold27_orf00015	PilI protein	Plasmid	-	85	PilI	5949		0	1	1	0	0	1	1	1	0	0	0	0	0	0	0	0	0	0	0	0	0	0	0	0	0	0	0	0	0	1	0	1	0	0	0	0	0	0	0	0
P_3	SAPA_P0114	MC_04-0873.scaffold_scaffold27_orf00016	TraC protein	Plasmid	-	63	TraC	5950		0	1	1	0	0	1	1	1	0	0	0	0	0	0	0	0	0	0	0	0	0	0	0	0	0	0	0	0	0	1	0	1	0	0	0	0	0	0	0	0
P_3	SAPA_P0115	MC_05-0784.scaffold_scaffold21_orf00115	Transcription termination factor NusG	Plasmid	-	88	-	5951		0	1	1	0	0	1	1	1	0	0	0	0	0	0	0	0	0	0	0	0	0	0	0	0	0	0	0	0	0	1	0	1	0	0	0	0	0	0	0	0
P_3	SAPA_P0116	MC_04-0873.scaffold_scaffold27_orf00019	Sigma-70 region 4 type 2	Plasmid	-	79	TraA	5952		0	1	1	0	0	1	1	1	0	0	0	0	0	0	0	0	0	0	0	0	0	0	0	0	0	0	0	0	0	1	0	1	0	0	0	0	0	0	0	0
P_3	SAPA_P0117	MC_04-0873.scaffold_scaffold27_orf00020	Replication initiation protein	Plasmid	-	344	repZ	5953		0	1	1	0	0	1	1	1	0	0	0	0	0	0	0	0	0	0	0	0	0	0	0	0	0	0	0	0	0	1	0	1	0	0	0	0	0	0	0	0
P_3	SAPA_P0118	MC_04-0873.scaffold_scaffold27_orf00021	Conserved hypothetical plasmid protein	Plasmid	-	53	-	5954		0	1	1	0	0	1	1	1	0	0	0	0	0	0	0	0	0	0	0	0	0	0	0	0	0	0	0	0	0	1	0	1	0	0	0	0	0	0	0	0
P_3	SAPA_P0119	MC_04-0873.scaffold_scaffold27_orf00023	ATPase components of ABC transporters with duplicated ATPase domains	Plasmid	-	90	yacA	5955		0	0	0	0	0	0	0	0	0	0	0	0	0	0	0	0	0	0	0	0	0	0	0	0	0	0	0	0	0	1	0	1	0	0	0	0	0	0	0	0
P_3	SAPA_P0120	MC_04-0873.scaffold_scaffold27_orf00024	Plasmid stabilization system protein	Plasmid	-	94	-	5956		0	0	0	0	0	0	0	0	0	0	0	0	0	0	0	0	0	0	0	0	0	0	0	0	0	0	0	0	0	1	0	1	0	0	0	0	0	0	0	0
P_3	SAPA_P0121	MC_04-0873.scaffold_scaffold27_orf00025	DNA polymerase III, epsilon subunit and related 3'-5' exonucleases	Plasmid	-	283	yacC	5957		0	0	0	0	0	0	0	0	0	0	0	0	0	0	0	0	0	0	0	0	0	0	0	0	0	0	0	0	0	1	0	1	0	0	0	0	0	0	0	0
P_3	SAPA_P0122	MC_04-0873.scaffold_C2523_orf00002	PecM-like protein	Plasmid	-	287	-	5958		0	0	0	0	0	0	0	0	0	0	0	0	0	0	0	0	0	0	0	0	0	0	0	0	0	0	0	0	0	1	0	0	0	0	0	0	0	0	0	0
P_3	SAPA_P0123	MC_04-0873.scaffold_C2523_orf00004	Class A tetracycline resistance protein	Plasmid	-	425	tetA	5959		0	0	0	0	0	0	0	0	0	0	0	0	0	0	0	0	0	0	0	0	0	0	0	0	0	0	0	0	0	1	0	0	0	0	0	0	0	0	0	0
P_3	SAPA_P0124	MC_09-0426.scaffold_C2561_orf00005	Tetracycline repressor protein class A from transposon 1721	Plasmid	-	226	tetR	5960		0	0	0	0	0	0	0	0	0	0	0	0	0	0	0	0	0	0	0	0	0	0	0	0	0	0	0	0	0	1	0	0	0	0	0	0	0	0	0	0
P_3	SAPA_P0125	MC_04-0873.scaffold_scaffold27_orf00027	MerR transcriptional regular	Plasmid	-	145	-	5961		0	0	0	0	0	0	0	0	0	0	0	0	0	0	0	0	0	0	0	0	0	0	0	0	0	0	0	0	0	1	0	0	0	0	0	0	0	0	0	0
P_3	SAPA_P0126	MC_04-0873.scaffold_scaffold27_orf00028	Mercuric transport protein	Plasmid	-	117	-	5962		0	0	0	0	0	0	0	0	0	0	0	0	0	0	0	0	0	0	0	0	0	0	0	0	0	0	0	0	0	1	0	0	0	0	0	0	0	0	0	0
P_3	SAPA_P0127	MC_04-0873.scaffold_scaffold27_orf00029	Mercuric transport protein periplasmic component	Plasmid	-	92	-	5963		0	0	0	0	0	0	0	0	0	0	0	0	0	0	0	0	0	0	0	0	0	0	0	0	0	0	0	0	0	1	0	0	0	0	0	0	0	0	0	0
P_3	SAPA_P0128	MC_04-0873.scaffold_scaffold27_orf00030	Mercuric transport protein	Plasmid	-	141	-	5964		0	0	0	0	0	0	0	0	0	0	0	0	0	0	0	0	0	0	0	0	0	0	0	0	0	0	0	0	0	1	0	0	0	0	0	0	0	0	0	0
P_3	SAPA_P0129	MC_04-0873.scaffold_scaffold27_orf00032	Mercuric reductase MerA	Plasmid	-	420	-	5965		0	0	0	0	0	0	0	0	0	0	0	0	0	0	0	0	0	0	0	0	0	0	0	0	0	0	0	0	0	1	0	0	0	0	0	0	0	0	0	0
P_3	SAPA_P0130	MC_04-0873.scaffold_scaffold27_orf00033	Mercury resistance operon transcriptional regulator MerD	Plasmid	-	121	-	5966		0	0	0	0	0	0	0	0	0	0	0	0	0	0	0	0	0	0	0	0	0	0	0	0	0	0	0	0	0	1	0	0	0	0	0	0	0	0	0	0
P_3	SAPA_P0131	WS1035.scaffold_scaffold4_orf00029	TniA; integrase core domain	Plasmid	-	413	-	5967		0	0	0	0	0	0	0	0	0	0	0	0	0	0	0	0	0	0	0	0	0	0	0	0	0	0	0	0	0	1	0	1	0	0	0	0	0	0	0	0
P_3	SAPA_P0132	MC_05-0784.scaffold_scaffold21_orf00110	CopG family protein	Plasmid	-	95	-	5968		0	1	1	0	0	1	1	1	0	0	0	0	0	0	0	0	0	0	0	0	0	0	0	0	0	0	0	0	0	0	0	0	0	0	0	0	0	0	0	0
P_3	SAPA_P0133	MC_05-0784.scaffold_scaffold21_orf00109	Plasmid stabilization system protein, RelE/ParE family	Plasmid	-	92	-	5969		0	1	1	0	0	1	1	1	0	0	0	0	0	0	0	0	0	0	0	0	0	0	0	0	0	0	0	0	0	0	0	0	0	0	0	0	0	0	0	0
P_3	SAPA_P0134	MC_05-0784.scaffold_scaffold21_orf00108	IPF_100	Plasmid	-	94	-	5970		0	1	1	0	0	1	1	1	0	0	0	0	0	0	0	0	0	0	0	0	0	0	0	0	0	0	0	0	0	0	0	0	0	0	0	0	0	0	0	0
P_3	SAPA_P0135	MC_05-0784.scaffold_scaffold21_orf00107	Transposase of Tn5393-like transposon, C-terminal	Plasmid	-	362	-	5971		0	1	1	0	0	1	1	1	0	0	0	0	0	0	0	0	0	0	0	0	0	0	0	0	0	0	0	0	0	0	0	0	0	0	0	0	0	0	0	0
P_3	SAPA_P0139	MC_05-0784.scaffold_scaffold21_orf00100	Transposase TnpA for transposon Tn5393	Plasmid	-	523	-	5975		0	1	1	0	0	1	1	1	0	0	0	0	0	0	0	0	0	0	0	0	0	0	0	0	0	0	0	0	0	0	0	0	0	0	0	0	0	0	0	0
P_3	SAPA_P0141	MC_05-0784.scaffold_scaffold21_orf00096	Streptomycin 3''-kinase (Streptomycin 3''-phosphotransferase) (Streptomycin 6-phosphotransferase) (Streptomycin 6-kinase)	Plasmid	-	303	strA	5977		0	1	1	0	0	1	1	1	0	0	0	0	0	0	0	0	0	0	0	0	0	0	0	0	0	0	0	0	0	0	0	0	0	0	0	0	0	0	0	0
P_3	SAPA_P0142	MC_05-0784.scaffold_scaffold21_orf00094	Streptomycin 3''-kinase (Streptomycin 3''-phosphotransferase) (SPH)	Plasmid	-	277	strB	5978		0	1	1	0	0	1	1	1	0	0	0	0	0	0	0	0	0	0	0	0	0	0	0	0	0	0	0	0	0	0	0	0	0	0	0	0	0	0	0	0
P_3	SAPA_P0143	WR-00-06755_111212_4.remap_scaffold61_orf00005	Short chain dehydrogenase (Fragment)	Plasmid	-	288	-	5979		0	0	0	0	0	0	0	0	0	0	0	0	0	0	0	0	0	0	0	0	0	0	0	0	0	0	0	0	0	0	0	1	0	0	0	0	0	0	0	0
P_3	SAPA_P0144	WR-00-06755_111212_4.remap_scaffold61_orf00003	Sch_047	Plasmid	-	82	yqkA	5980		0	0	0	0	0	0	0	0	0	0	0	0	0	0	0	0	0	0	0	0	0	0	0	0	0	0	0	0	0	0	0	1	0	0	0	0	0	0	0	0
P_3	SAPA_P0145	WR-00-06755_111212_4.remap_scaffold61_orf00002	Dihydropteroate synthase (Fragment)	Plasmid	-	264	sulI	5981		0	0	0	0	0	0	0	0	0	0	0	0	0	0	0	0	0	0	0	0	0	0	0	0	0	0	0	0	0	0	0	1	0	0	0	0	0	0	0	0
P_3	SAPA_P0146	WR-00-06755_111212_4.remap_scaffold61_orf00001	Transposase, Mutator family	Plasmid	-	62	-	5982		0	0	0	0	0	0	0	0	0	0	0	0	0	0	0	0	0	0	0	0	0	0	0	0	0	0	0	0	0	0	0	1	0	0	0	0	0	0	0	0
P_3	SAPA_P0147	CS_NB04.055_111212_1.remap_C2362_orf00001	Aminoglycoside adenyltransferase A2	Plasmid	-	260	aadA	5983		0	0	0	0	0	0	0	0	0	0	0	0	0	0	0	0	0	0	0	0	0	0	0	0	0	0	0	0	0	0	0	1	0	0	0	0	0	0	0	0
P_3	SAPA_P0148	WR-00-06755_111212_4.remap_scaffold12_orf00001	Chloramphenicol transporter	Plasmid	-	420	cmlA	5984		0	0	0	0	0	0	0	0	0	0	0	0	0	0	0	0	0	0	0	0	0	0	0	0	0	0	0	0	0	0	0	1	0	0	0	0	0	0	0	0
P_3	SAPA_P0149	MC_09-0426.scaffold_scaffold51_orf00051	Integrase/recombinase (E2 protein)	Plasmid	-	338	intI1	5985		0	0	0	0	0	0	0	0	0	0	0	0	0	0	0	0	0	0	0	0	0	0	0	0	0	0	0	0	0	0	0	1	0	0	0	0	0	0	0	0
P_3	SAPA_P0150	WR-00-06755_111212_4.remap_scaffold11_orf00002	Streptothricin acetyl-transferase (Fragment)	Plasmid	-	360	sat	5986		0	0	0	0	0	0	0	0	0	0	0	0	0	0	0	0	0	0	0	0	0	0	0	0	0	0	0	0	0	0	0	1	0	0	0	0	0	0	0	0
P_3	SAPA_P0151	WR-00-06755_111212_4.remap_scaffold11_orf00001	Putative phosphoserine phosphatase (Fragment)	Plasmid	-	47	-	5987		0	0	0	0	0	0	0	0	0	0	0	0	0	0	0	0	0	0	0	0	0	0	0	0	0	0	0	0	0	0	0	1	0	0	0	0	0	0	0	0
P_3	SAPA_P0152	WR-00-06755_111212_4.remap_scaffold52_orf00039	Resolvase domain protein	Plasmid	-	187	-	5988		0	0	0	0	0	0	0	0	0	0	0	0	0	0	0	0	0	0	0	0	0	0	0	0	0	0	0	0	0	0	0	1	0	0	0	0	0	0	0	0
P_3	SAPA_P0154	MC_04-0873.scaffold_scaffold27_orf00036	conserved hypothetical plasmid protein	Plasmid	-	99	YadA	5990		0	0	0	0	0	0	0	0	0	0	0	0	0	0	0	0	0	0	0	0	0	0	0	0	0	0	0	0	0	1	0	1	0	0	0	0	0	0	0	0
P_3	SAPA_P0155	MC_05-0784.scaffold_scaffold21_orf00093	YafA	Plasmid	-	75	-	5991		0	1	1	0	0	1	1	1	0	0	0	0	0	0	0	0	0	0	0	0	0	0	0	0	0	0	0	0	0	1	0	1	0	0	0	0	0	0	0	0
P_3	SAPA_P0156	MC_04-0873.scaffold_scaffold27_orf00042	Conserved hypothetical plasmid protein	Plasmid	-	449	YagA	5992		0	0	0	0	0	0	0	0	0	0	0	0	0	0	0	0	0	0	0	0	0	0	0	0	0	0	0	0	0	1	0	1	0	0	0	0	0	0	0	0
P_3	SAPA_P0157	MC_05-0784.scaffold_scaffold21_orf00091	Putative uncharacterized protein	Plasmid	-	351	-	5993		0	1	1	0	0	1	1	1	0	0	0	0	0	0	0	0	0	0	0	0	0	0	0	0	0	0	0	0	0	0	0	0	0	0	0	0	0	0	0	0
P_3	SAPA_P0158	MC_04-0873.scaffold_scaffold27_orf00044	Putative uncharacterized protein	Plasmid	-	211	-	5994		0	0	0	0	0	0	0	0	0	0	0	0	0	0	0	0	0	0	0	0	0	0	0	0	0	0	0	0	0	1	0	1	0	0	0	0	0	0	0	0
P_3	SAPA_P0159	MC_04-0873.scaffold_scaffold27_orf00045	Colicin Ib	Plasmid	-	368	-	5995		0	0	0	0	0	0	0	0	0	0	0	0	0	0	0	0	0	0	0	0	0	0	0	0	0	0	0	0	0	1	0	1	0	0	0	0	0	0	0	0
P_3	SAPA_P0160	MC_04-0873.scaffold_scaffold27_orf00046	Uncharacterized protein	Plasmid	-	116	-	5996		0	0	0	0	0	0	0	0	0	0	0	0	0	0	0	0	0	0	0	0	0	0	0	0	0	0	0	0	0	1	0	1	0	0	0	0	0	0	0	0
P_3	SAPA_P0161	MC_04-0873.scaffold_scaffold27_orf00047	YdeA protein	Plasmid	-	184	-	5997		0	1	1	0	0	1	1	1	0	0	0	0	0	0	0	0	0	0	0	0	0	0	0	0	0	0	0	0	0	1	0	1	0	0	0	0	0	0	0	0
P_3	SAPA_P0162	MC_04-0873.scaffold_scaffold27_orf00049	YdfA protein	Plasmid	-	87	-	5998		0	0	0	0	0	0	0	0	0	0	0	0	0	0	0	0	0	0	0	0	0	0	0	0	0	0	0	0	0	1	0	1	0	0	0	0	0	0	0	0
P_3	SAPA_P0163	MC_08-0532.scaffold_scaffold16_orf00021	CcdA protein	Plasmid	-	73	ccdA	5999		0	0	0	0	0	0	0	0	0	0	0	0	0	0	0	0	0	0	0	0	0	0	0	0	0	0	0	0	0	1	0	0	0	0	0	0	0	0	0	0
P_3	SAPA_P0164	MC_08-0532.scaffold_scaffold16_orf00022	Gyrase inhibitor	Plasmid	-	102	letB	6000		0	0	0	0	0	0	0	0	0	0	0	0	0	0	0	0	0	0	0	0	0	0	0	0	0	0	0	0	0	1	0	0	0	0	0	0	0	0	0	0
P_3	SAPA_P0165	MC_05-0784.scaffold_scaffold21_orf00086	YedA protein	Plasmid	-	127	-	6001		0	1	1	0	0	1	1	1	0	0	0	0	0	0	0	0	0	0	0	0	0	0	0	0	0	0	0	0	0	0	0	1	0	0	0	0	0	0	0	0
P_3	SAPA_P0166	WS1035.scaffold_scaffold4_orf00017	Site-specific recombinase, phage integrase family	Plasmid	-	262	-	6002		0	1	1	0	0	1	1	1	0	0	0	0	0	0	0	0	0	0	0	0	0	0	0	0	0	0	0	0	0	1	0	1	0	0	0	0	0	0	0	0
P_3	SAPA_P0167	WS1035.scaffold_scaffold4_orf00015	Plasmid partition protein ParA-like protein	Plasmid	-	146	-	6003		0	0	0	0	0	0	0	0	0	0	0	0	0	0	0	0	0	0	0	0	0	0	0	0	0	0	0	0	0	0	0	0	0	0	0	0	0	0	0	0
P_3	SAPA_P0168	WS1035.scaffold_scaffold4_orf00013	StbA protein	Plasmid	-	325	parM	6004		0	0	0	0	0	0	0	0	0	0	0	0	0	0	0	0	0	0	0	0	0	0	0	0	0	0	0	0	0	0	0	0	0	0	0	0	0	0	0	0
P_3	SAPA_P0169	WS1035.scaffold_scaffold4_orf00012	Plasmid stability protein StbB	Plasmid	-	131	-	6005		0	0	0	0	0	0	0	0	0	0	0	0	0	0	0	0	0	0	0	0	0	0	0	0	0	0	0	0	0	0	0	0	0	0	0	0	0	0	0	0
P_3	SAPA_P0170	MC_05-0784.scaffold_scaffold21_orf00084	ParA protein homolog	Plasmid	-	215	-	6006		0	1	1	0	0	1	1	1	0	0	0	0	0	0	0	0	0	0	0	0	0	0	0	0	0	0	0	0	0	1	0	1	0	0	0	0	0	0	0	0
P_3	SAPA_P0171	MC_05-0632_batch3.remap_scaffold66_orf00013	YegA protein	Plasmid	-	103	-	6007		0	1	1	0	0	1	1	1	0	0	0	0	0	0	0	0	0	0	0	0	0	0	0	0	0	0	0	0	0	1	0	1	0	0	0	0	0	0	0	0
P_3	SAPA_P0172	MC_05-0784.scaffold_scaffold21_orf00082	Plasmid segregation protein ParM	Plasmid	-	327	-	6008		0	1	1	0	0	1	1	1	0	0	0	0	0	0	0	0	0	0	0	0	0	0	0	0	0	0	0	0	0	1	0	1	0	0	0	0	0	0	0	0
P_3	SAPA_P0173	MC_04-0873.scaffold_scaffold27_orf00058	Plasmid stability protein	Plasmid	-	139	-	6009		0	1	1	0	0	1	1	1	0	0	0	0	0	0	0	0	0	0	0	0	0	0	0	0	0	0	0	0	0	1	0	1	0	0	0	0	0	0	0	0
P_3	SAPA_P0177	MC_05-0784.scaffold_scaffold21_orf00080	DNA polymerase type-Y, UV protection protein impB	Plasmid	-	425	umuC	6013		0	1	1	0	0	1	1	1	0	0	0	0	0	0	0	0	0	0	0	0	0	0	0	0	0	0	0	0	0	1	0	1	0	0	0	0	0	0	0	0
P_3	SAPA_P0178	MC_05-0784.scaffold_scaffold21_orf00079	Peptidase S24-like domain protein	Plasmid	-	146	-	6014		0	1	1	0	0	1	1	1	0	0	0	0	0	0	0	0	0	0	0	0	0	0	0	0	0	0	0	0	0	1	0	1	0	0	0	0	0	0	0	0
P_3	SAPA_P0179	MC_04-0873.scaffold_scaffold27_orf00066	DinI-like family protein	Plasmid	-	83	impC	6015		0	1	1	0	0	1	1	1	0	0	0	0	0	0	0	0	0	0	0	0	0	0	0	0	0	0	0	0	0	1	0	1	0	0	0	0	0	0	0	0
P_3	SAPA_P0180	MC_05-0784.scaffold_scaffold21_orf00077	YccB	Plasmid	-	309	-	6016		0	1	1	0	0	1	1	1	0	0	0	0	0	0	0	0	0	0	0	0	0	0	0	0	0	0	0	0	0	1	0	1	0	0	0	0	0	0	0	0
P_3	SAPA_P0181	WR-00-06755_111212_4.remap_scaffold52_orf00012	Conserved hypothetical plasmid protein	Plasmid	-	58	-	6017		0	0	0	0	0	0	0	0	0	0	0	0	0	0	0	0	0	0	0	0	0	0	0	0	0	0	0	0	0	1	0	1	0	0	0	0	0	0	0	0
P_3	SAPA_P0182	MC_05-0784.scaffold_scaffold21_orf00075	DNA methylase family protein	Plasmid	-	228	-	6018		0	1	1	0	0	1	1	1	0	0	0	0	0	0	0	0	0	0	0	0	0	0	0	0	0	0	0	0	0	1	0	1	0	0	0	0	0	0	0	0
P_3	SAPA_P0183	MC_05-0784.scaffold_scaffold21_orf00073	YubE protein	Plasmid	-	74	yceA	6019		0	1	1	0	0	1	1	1	0	0	0	0	0	0	0	0	0	0	0	0	0	0	0	0	0	0	0	0	0	1	0	1	0	0	0	0	0	0	0	0
P_3	SAPA_P0184	MC_05-0784.scaffold_scaffold21_orf00072	YcgB	Plasmid	-	145	-	6020		0	1	1	0	0	1	1	1	0	0	0	0	0	0	0	0	0	0	0	0	0	0	0	0	0	0	0	0	0	1	0	1	0	0	0	0	0	0	0	0
P_3	SAPA_P0185	MC_05-0784.scaffold_scaffold21_orf00071	YcfA protein	Plasmid	-	274	ycfA	6021		0	1	1	0	0	1	1	1	0	0	0	0	0	0	0	0	0	0	0	0	0	0	0	0	0	0	0	0	0	1	0	1	0	0	0	0	0	0	0	0
P_3	SAPA_P0186	MC_05-0784.scaffold_scaffold21_orf00070	Anti-restriction protein klcA	Plasmid	-	142	klcA	5934		0	1	1	0	0	1	1	1	0	0	0	0	0	0	0	0	0	0	0	0	0	0	0	0	0	0	0	0	0	1	0	1	0	0	0	0	0	0	0	0
P_3	SAPA_P0187	MC_04-0873.scaffold_scaffold27_orf00077	Collagenase and related proteases	Plasmid	-	141	ycjA	5933		0	1	1	0	0	1	1	1	0	0	0	0	0	0	0	0	0	0	0	0	0	0	0	0	0	0	0	0	0	1	0	1	0	0	0	0	0	0	0	0
P_3	SAPA_P0188	MC_05-0784.scaffold_scaffold21_orf00067	Predicted plasmid protein	Plasmid	-	64	-	5932		0	1	1	0	0	1	1	1	0	0	0	0	0	0	0	0	0	0	0	0	0	0	0	0	0	0	0	0	0	1	0	1	0	0	0	0	0	0	0	0
P_3	SAPA_P0189	MC_04-0873.scaffold_scaffold27_orf00081	Plasmid-derived single-stranded DNA-binding protein	Plasmid	-	176	-	5935		0	1	1	0	0	1	1	1	0	0	0	0	0	0	0	0	0	0	0	0	0	0	0	0	0	0	0	0	0	1	0	1	0	0	0	0	0	0	0	0
P_3	SAPA_P0190	MC_04-0873.scaffold_scaffold27_orf00082	YubL protein	Plasmid	-	78	-	5936		0	1	1	0	0	1	1	1	0	0	0	0	0	0	0	0	0	0	0	0	0	0	0	0	0	0	0	0	0	1	0	1	0	0	0	0	0	0	0	0
P_3	SAPA_P0191	MC_05-0784.scaffold_scaffold21_orf00063	ParB-like nuclease	Plasmid	-	653	-	5937		0	1	1	0	0	1	1	1	0	0	0	0	0	0	0	0	0	0	0	0	0	0	0	0	0	0	0	0	0	1	0	1	0	0	0	0	0	0	0	0
P_3	SAPA_P0192	MC_05-0784.scaffold_scaffold21_orf00061	Plasmid SOS inhibition protein PsiB	Plasmid	-	145	psiB	5938		0	1	1	0	0	1	1	1	0	0	0	0	0	0	0	0	0	0	0	0	0	0	0	0	0	0	0	0	0	1	0	1	0	0	0	0	0	0	0	0
P_3	SAPA_P0193	MC_04-0873.scaffold_scaffold27_orf00088	Plasmid SOS inhibition protein	Plasmid	-	240	-	5939		0	1	1	0	0	1	1	1	0	0	0	0	0	0	0	0	0	0	0	0	0	0	0	0	0	0	0	0	0	1	0	1	0	0	0	0	0	0	0	0
P_3	SAPA_P0194	MC_05-0784.scaffold_scaffold21_orf00058	YgaA protein	Plasmid	-	199	-	5940		0	1	1	0	0	1	1	1	0	0	0	0	0	0	0	0	0	0	0	0	0	0	0	0	0	0	0	0	0	1	0	1	0	0	0	0	0	0	0	0
P_3	SAPA_P0195	MC_05-0784.scaffold_scaffold21_orf00057	YgbA-ard	Plasmid	-	167	ard	6062		0	1	1	0	0	1	1	1	0	0	0	0	0	0	0	0	0	0	0	0	0	0	0	0	0	0	0	0	0	1	0	1	0	0	0	0	0	0	0	0
P_3	SAPA_P0196	MC_05-0784.scaffold_scaffold21_orf00055	YgcA protein	Plasmid	-	145	ydfA	6022		0	1	1	0	0	1	1	1	0	0	0	0	0	0	0	0	0	0	0	0	0	0	0	0	0	0	0	0	0	1	0	1	0	0	0	0	0	0	0	0
P_3	SAPA_P0197	MC_05-0784.scaffold_scaffold21_orf00053	YgdA protein	Plasmid	-	89	ydfB	6023		0	1	1	0	0	1	1	1	0	0	0	0	0	0	0	0	0	0	0	0	0	0	0	0	0	0	0	0	0	1	0	1	0	0	0	0	0	0	0	0
P_3	SAPA_P0198	WR-00-06755_111212_4.remap_scaffold31_orf00060	Putative YhgA-like transposase	Plasmid	-	297	ydgA	6024		0	1	1	0	0	1	1	1	0	0	0	0	0	0	0	0	0	0	0	0	0	0	0	0	0	0	0	0	0	1	0	1	0	0	0	0	0	0	0	0
P_3	SAPA_P0199	MC_05-0784.scaffold_scaffold21_orf00051	Conserved hypothetical plasmid protein	Plasmid	-	61	YdgA	6025		0	1	1	0	0	1	1	1	0	0	0	0	0	0	0	0	0	0	0	0	0	0	0	0	0	0	0	0	0	1	0	1	0	0	0	0	0	0	0	0
P_3	SAPA_P0200	MC_05-0784.scaffold_scaffold21_orf00049	YgeA protein	Plasmid	-	84	ygeA	6026		0	1	1	0	0	1	1	1	0	0	0	0	0	0	0	0	0	0	0	0	0	0	0	0	0	0	0	0	0	1	0	1	0	0	0	0	0	0	0	0
P_3	SAPA_P0201	MC_05-0784.scaffold_scaffold21_orf00047	Conserved hypothetical plasmid protein	Plasmid	-	283	ydiA	6027		0	1	1	0	0	1	1	1	0	0	0	0	0	0	0	0	0	0	0	0	0	0	0	0	0	0	0	0	0	1	0	1	0	0	0	0	0	0	0	0
P_3	SAPA_P0202	MC_04-0873.scaffold_scaffold27_orf00100	YggA protein	Plasmid	-	112	mobC	6028		0	1	1	0	0	1	1	1	0	0	0	0	0	0	0	0	0	0	0	0	0	0	0	0	0	0	0	0	0	1	0	1	0	0	0	0	0	0	0	0
P_3	SAPA_P0203	MC_04-0873.scaffold_scaffold27_orf00101	Relaxosome component	Plasmid	-	39	-	6029		0	1	1	0	0	1	1	1	0	0	0	0	0	0	0	0	0	0	0	0	0	0	0	0	0	0	0	0	0	1	0	1	0	0	0	0	0	0	0	0
P_3	SAPA_P0204	MC_05-0784.scaffold_scaffold21_orf00044	Relaxase/mobilization nuclease domain protein	Plasmid	MOBP	900	-	6030		0	1	1	0	0	1	1	1	0	0	0	0	0	0	0	0	0	0	0	0	0	0	0	0	0	0	0	0	0	1	0	1	0	0	0	0	0	0	0	0
P_3	SAPA_P0205	MC_04-0873.scaffold_scaffold27_orf00104	TrbC-like protein	Plasmid	t4cp	764	trbC	6031		0	1	1	0	0	1	1	1	0	0	0	0	0	0	0	0	0	0	0	0	0	0	0	0	0	0	0	0	0	1	0	1	0	0	0	0	0	0	0	0
P_3	SAPA_P0206	MC_04-0873.scaffold_scaffold27_orf00105	TrbB protein	Plasmid	-	357	trbB	6032		0	1	1	0	0	1	1	1	0	0	0	0	0	0	0	0	0	0	0	0	0	0	0	0	0	0	0	0	0	1	0	1	0	0	0	0	0	0	0	0
P_3	SAPA_P0207	MC_05-0784.scaffold_scaffold21_orf00040	TrbA-like protein	Plasmid	-	403	trbA	6033		0	1	1	0	0	1	1	1	0	0	0	0	0	0	0	0	0	0	0	0	0	0	0	0	0	0	0	0	0	1	0	1	0	0	0	0	0	0	0	0
P_3	SAPA_P0208	MC_05-0784.scaffold_scaffold21_orf00039	Haemophilus-specific protein, uncharacterized	Plasmid	-	329	-	6034		0	1	1	0	0	1	1	1	0	0	0	0	0	0	0	0	0	0	0	0	0	0	0	0	0	0	0	0	0	0	0	0	0	0	0	0	0	0	0	0
P_3	SAPA_P0212	WR-00-06755_111212_4.remap_scaffold31_orf00038	Exclusion-determining protein	Plasmid	-	221	-	6038		0	1	1	0	0	1	1	1	0	0	0	0	0	0	0	0	0	0	0	0	0	0	0	0	0	0	0	0	0	1	0	1	0	0	0	0	0	0	0	0
P_3	SAPA_P0213	WR-00-06755_111212_4.remap_scaffold31_orf00037	TraY integral membrane protein	Plasmid	I_traY	746	traY	6039		0	1	1	0	0	1	1	1	0	0	0	0	0	0	0	0	0	0	0	0	0	0	0	0	0	0	0	0	0	1	0	1	0	0	0	0	0	0	0	0
P_3	SAPA_P0214	MC_04-0873.scaffold_scaffold27_orf00116	TraX-like protein	Plasmid	I_traX	195	traX	6040		0	1	1	0	0	1	1	1	0	0	0	0	0	0	0	0	0	0	0	0	0	0	0	0	0	0	0	0	0	1	0	1	0	0	0	0	0	0	0	0
P_3	SAPA_P0215	MC_05-0784.scaffold_scaffold21_orf00029	TraW protein	Plasmid	I_traW	401	TraW	6041		0	1	1	0	0	1	1	1	0	0	0	0	0	0	0	0	0	0	0	0	0	0	0	0	0	0	0	0	0	1	0	1	0	0	0	0	0	0	0	0
P_3	SAPA_P0216	MC_05-0784.scaffold_scaffold21_orf00027	Thick pilus protein	Plasmid	traU	1015	TraU	6042		0	1	1	0	0	1	1	1	0	0	0	0	0	0	0	0	0	0	0	0	0	0	0	0	0	0	0	0	0	1	0	1	0	0	0	0	0	0	0	0
P_3	SAPA_P0217	MC_05-0784.scaffold_scaffold21_orf00024	TraT protein	Plasmid	I_traT	267	TraT	6043		0	1	1	0	0	1	1	1	0	0	0	0	0	0	0	0	0	0	0	0	0	0	0	0	0	0	0	0	0	1	0	1	0	0	0	0	0	0	0	0
P_3	SAPA_P0218	MC_04-0873.scaffold_scaffold27_orf00122	TraS protein	Plasmid	I_traS	63	TraS	6044		0	1	1	0	0	1	1	1	0	0	0	0	0	0	0	0	0	0	0	0	0	0	0	0	0	0	0	0	0	1	0	1	0	0	0	0	0	0	0	0
P_3	SAPA_P0219	MC_04-0873.scaffold_scaffold27_orf00123	TraR protein	Plasmid	I_traR	135	TraR	6045		0	1	1	0	0	1	1	1	0	0	0	0	0	0	0	0	0	0	0	0	0	0	0	0	0	0	0	0	0	1	0	1	0	0	0	0	0	0	0	0
P_3	SAPA_P0220	MC_05-0784.scaffold_scaffold21_orf00021	Conjugal transfer protein	Plasmid	I_traQ	176	traQ	6046		0	1	1	0	0	1	1	1	0	0	0	0	0	0	0	0	0	0	0	0	0	0	0	0	0	0	0	0	0	1	0	1	0	0	0	0	0	0	0	0
P_3	SAPA_P0221	MC_05-0784.scaffold_scaffold21_orf00020	TraP protein	Plasmid	I_traP	139	traP	6047		0	1	1	0	0	1	1	1	0	0	0	0	0	0	0	0	0	0	0	0	0	0	0	0	0	0	0	0	0	1	0	1	0	0	0	0	0	0	0	0
P_3	SAPA_P0222	MC_05-0784.scaffold_scaffold21_orf00019	TraO transfer protein	Plasmid	I_traO	430	traO	6048		0	1	1	0	0	1	1	1	0	0	0	0	0	0	0	0	0	0	0	0	0	0	0	0	0	0	0	0	0	1	0	1	0	0	0	0	0	0	0	0
P_3	SAPA_P0223	MC_04-0873.scaffold_scaffold27_orf00128	Conjugal transfer protein	Plasmid	I_traN	328	traN	6049		0	1	1	0	0	1	1	1	0	0	0	0	0	0	0	0	0	0	0	0	0	0	0	0	0	0	0	0	0	1	0	1	0	0	0	0	0	0	0	0
P_3	SAPA_P0224	MC_05-0784.scaffold_scaffold21_orf00016	Conjugal transfer protein	Plasmid	I_traM	205	traM	6050		0	1	1	0	0	1	1	1	0	0	0	0	0	0	0	0	0	0	0	0	0	0	0	0	0	0	0	0	0	1	0	1	0	0	0	0	0	0	0	0
P_3	SAPA_P0225	MC_04-0873.scaffold_scaffold27_orf00130	TraL	Plasmid	I_traL	116	traL	6051		0	1	1	0	0	1	1	1	0	0	0	0	0	0	0	0	0	0	0	0	0	0	0	0	0	0	0	0	0	1	0	1	0	0	0	0	0	0	0	0
P_3	SAPA_P0226	MC_05-0784.scaffold_scaffold21_orf00014	DNA primase SogL	Plasmid	-	1256	-	6052		0	1	1	0	0	1	1	1	0	0	0	0	0	0	0	0	0	0	0	0	0	0	0	0	0	0	0	0	0	1	0	1	0	0	0	0	0	0	0	0
P_3	SAPA_P0227	MC_05-0784.scaffold_scaffold21_orf00013	Phospholipase D (PLD) family protein	Plasmid	-	256	-	6053		0	1	1	0	0	1	1	1	0	0	0	0	0	0	0	0	0	0	0	0	0	0	0	0	0	0	0	0	0	1	0	1	0	0	0	0	0	0	0	0
P_3	SAPA_P0228	MC_05-0784.scaffold_scaffold21_orf00012	Plasmid transfer ATPase TraJ	Plasmid	I_traJ	383	traJ	6054		0	1	1	0	0	1	1	1	0	0	0	0	0	0	0	0	0	0	0	0	0	0	0	0	0	0	0	0	0	1	0	1	0	0	0	0	0	0	0	0
P_3	SAPA_P0229	MC_05-0784.scaffold_scaffold21_orf00010	Relaxase TraI	Plasmid	I_traI	273	-	6055		0	1	1	0	0	1	1	1	0	0	0	0	0	0	0	0	0	0	0	0	0	0	0	0	0	0	0	0	0	1	0	1	0	0	0	0	0	0	0	0
P_3	SAPA_P0230	MC_04-0873.scaffold_scaffold27_orf00142	Phosphoglycerate mutase family protein (Fragment)	Plasmid	I_traG	195	TraG	6056		0	1	1	0	0	1	1	1	0	0	0	0	0	0	0	0	0	0	0	0	0	0	0	0	0	0	0	0	0	1	0	1	0	0	0	0	0	0	0	0
P_3	SAPA_P0231	MC_04-0873.scaffold_scaffold27_orf00145	Conjugal transfer protein	Plasmid	I_traF	401	TraF	6057		0	1	1	0	0	1	1	1	0	0	0	0	0	0	0	0	0	0	0	0	0	0	0	0	0	0	0	0	0	1	0	1	0	0	0	0	0	0	0	0
P_3	SAPA_P0233	MC_05-0784.scaffold_scaffold21_orf00002	conjugational transfer protein TraE	Plasmid	I_traE	83	TraE	6059		0	1	1	0	0	1	1	1	0	0	0	0	0	0	0	0	0	0	0	0	0	0	0	0	0	0	0	0	0	0	0	0	0	0	0	0	0	0	0	0
P_3	SAPA_P0234	MC_04-0873.scaffold_scaffold27_orf00147	Conjugational transfer protein TraE	Plasmid	I_traE	275	TraE	6061		0	0	0	0	0	0	0	0	0	0	0	0	0	0	0	0	0	0	0	0	0	0	0	0	0	0	0	0	0	1	0	1	0	0	0	0	0	0	0	0
P_3	SAPA_P0235	MC_05-0602_111212_2.remap_scaffold23_orf00055	Shufflon-specific recombinase (Fragment)	Plasmid	-	398	-	6060		0	1	1	0	0	1	1	1	0	0	0	0	0	0	0	0	0	0	0	0	0	0	0	0	0	0	0	0	0	1	0	1	0	0	0	0	0	0	0	0
P_4	SAPA_P0236	DBS_20091706.scaffold_scaffold48_orf00052	Pilx9/VirB9-like protein	Plasmid	T_virB9	303	virB9	6064		0	0	0	0	0	0	0	0	0	0	0	0	0	0	0	0	0	0	0	0	0	0	0	0	0	0	0	0	0	0	0	0	0	1	0	0	0	0	0	0
P_4	SAPA_P0237	DBS_20091706.scaffold_scaffold48_orf00049	PilX8-VirB8-like protein	Plasmid	T_virB8	228	virB8	6065		0	0	0	0	0	0	0	0	0	0	0	0	0	0	0	0	0	0	0	0	0	0	0	0	0	0	0	0	0	0	0	0	0	1	0	0	0	0	0	0
P_4	SAPA_P0238	DBS_20091706.scaffold_scaffold48_orf00046	Pilx6/VirB6-like protein	Plasmid	T_virB6	358	virB6	6066		0	0	0	0	0	0	0	0	0	0	0	0	0	0	0	0	0	0	0	0	0	0	0	0	0	0	0	0	0	0	0	0	0	1	0	0	0	0	0	0
P_4	SAPA_P0239	DBS_20091706.scaffold_scaffold48_orf00044	Pilx5/VirB5-like protein	Plasmid	T_virB5	236	virB5	6067		0	0	0	0	0	0	0	0	0	0	0	0	0	0	0	0	0	0	0	0	0	0	0	0	0	0	0	0	0	0	0	0	0	1	0	0	0	0	0	0
P_4	SAPA_P0240	DBS_20091706.scaffold_scaffold48_orf00042	Pilx3-4/VirB3-4-like protein	Plasmid	virb4	915	virB3	6068		0	0	0	0	0	0	0	0	0	0	0	0	0	0	0	0	0	0	0	0	0	0	0	0	0	0	0	0	0	0	0	0	0	1	0	0	0	0	0	0
P_4	SAPA_P0241	DBS_20091706.scaffold_scaffold48_orf00041	VirB2-like protein	Plasmid	T_virB2	93	virB2	6069		0	0	0	0	0	0	0	0	0	0	0	0	0	0	0	0	0	0	0	0	0	0	0	0	0	0	0	0	0	0	0	0	0	1	0	0	0	0	0	0
P_4	SAPA_P0242	DBS_20091706.scaffold_scaffold48_orf00040	Type IV secretory pathway VirB1 component	Plasmid	T_virB1	237	virB1	6070		0	0	0	0	0	0	0	0	0	0	0	0	0	0	0	0	0	0	0	0	0	0	0	0	0	0	0	0	0	0	0	0	0	1	0	0	0	0	0	0
P_4	SAPA_P0243	DBS_20091706.scaffold_scaffold48_orf00039	Putative ATP/GTP-binding protein remnant	Plasmid	-	74	-	6071		0	0	0	0	0	0	0	0	0	0	0	0	0	0	0	0	0	0	0	0	0	0	0	0	0	0	0	0	0	0	0	0	0	1	0	0	0	0	0	0
P_4	SAPA_P0244	DBS_20091706.scaffold_scaffold48_orf00036	Putative transcriptional regulator	Plasmid	-	119	hipB1	6072		0	0	0	0	0	0	0	0	0	0	0	0	0	0	0	0	0	0	0	0	0	0	0	0	0	0	0	0	0	0	0	0	0	1	0	0	0	0	0	0
P_4	SAPA_P0245	DBS_20091706.scaffold_scaffold48_orf00035	Putative RepA protein	Plasmid	-	200	repA	6073		0	0	0	0	0	0	0	0	0	0	0	0	0	0	0	0	0	0	0	0	0	0	0	0	0	0	0	0	0	0	0	0	0	1	0	0	0	0	0	0
P_4	SAPA_P0246	DBS_20091706.scaffold_scaffold48_orf00032	Putative uncharacterized protein	Plasmid	-	247	-	6074		0	0	0	0	0	0	0	0	0	0	0	0	0	0	0	0	0	0	0	0	0	0	0	0	0	0	0	0	0	0	0	0	0	1	0	0	0	0	0	0
P_4	SAPA_P0247	DBS_20091706.scaffold_scaffold48_orf00030	Putative uncharacterized protein	Plasmid	-	215	-	6075		0	0	0	0	0	0	0	0	0	0	0	0	0	0	0	0	0	0	0	0	0	0	0	0	0	0	0	0	0	0	0	0	0	1	0	0	0	0	0	0
P_4	SAPA_P0248	DBS_20091706.scaffold_scaffold48_orf00029	OsmC-like protein	Plasmid	-	251	-	6076		0	0	0	0	0	0	0	0	0	0	0	0	0	0	0	0	0	0	0	0	0	0	0	0	0	0	0	0	0	0	0	0	0	1	0	0	0	0	0	0
P_4	SAPA_P0249	DBS_20091706.scaffold_scaffold48_orf00027	Oxidoreductase short chain dehydrogenase/reductase family	Plasmid	-	258	-	6077		0	0	0	0	0	0	0	0	0	0	0	0	0	0	0	0	0	0	0	0	0	0	0	0	0	0	0	0	0	0	0	0	0	1	0	0	0	0	0	0
P_4	SAPA_P0250	DBS_20091706.scaffold_scaffold48_orf00025	Isomerase putative	Plasmid	-	234	-	6078		0	0	0	0	0	0	0	0	0	0	0	0	0	0	0	0	0	0	0	0	0	0	0	0	0	0	0	0	0	0	0	0	0	1	0	0	0	0	0	0
P_4	SAPA_P0251	DBS_20091706.scaffold_scaffold48_orf00024	NADH:flavin oxidoreductase/NADH oxidase family protein	Plasmid	-	369	-	6079		0	0	0	0	0	0	0	0	0	0	0	0	0	0	0	0	0	0	0	0	0	0	0	0	0	0	0	0	0	0	0	0	0	1	0	0	0	0	0	0
P_4	SAPA_P0252	DBS_20091706.scaffold_scaffold48_orf00023	Predicted protein	Plasmid	-	110	-	6080		0	0	0	0	0	0	0	0	0	0	0	0	0	0	0	0	0	0	0	0	0	0	0	0	0	0	0	0	0	0	0	0	0	1	0	0	0	0	0	0
P_4	SAPA_P0253	DBS_20091706.scaffold_scaffold48_orf00021	Carboxymuconolactone decarboxylase	Plasmid	-	113	-	6081		0	0	0	0	0	0	0	0	0	0	0	0	0	0	0	0	0	0	0	0	0	0	0	0	0	0	0	0	0	0	0	0	0	1	0	0	0	0	0	0
P_4	SAPA_P0254	DBS_20091706.scaffold_scaffold48_orf00020	Transcriptional regulator	Plasmid	-	194	-	6082		0	0	0	0	0	0	0	0	0	0	0	0	0	0	0	0	0	0	0	0	0	0	0	0	0	0	0	0	0	0	0	0	0	1	0	0	0	0	0	0
P_4	SAPA_P0255	DBS_20091706.scaffold_scaffold48_orf00019	OsmC family protein	Plasmid	-	186	-	6083		0	0	0	0	0	0	0	0	0	0	0	0	0	0	0	0	0	0	0	0	0	0	0	0	0	0	0	0	0	0	0	0	0	1	0	0	0	0	0	0
P_4	SAPA_P0258	DBS_20091706.scaffold_scaffold48_orf00015	ATPase involved in chromosome partitioning	Plasmid	-	198	parA	6086		0	0	0	0	0	0	0	0	0	0	0	0	0	0	0	0	0	0	0	0	0	0	0	0	0	0	0	0	0	0	0	0	0	1	0	0	0	0	0	0
P_4	SAPA_P0259	DBS_20091706.scaffold_scaffold48_orf00013	Putative uncharacterized protein	Plasmid	-	115	-	6087		0	0	0	0	0	0	0	0	0	0	0	0	0	0	0	0	0	0	0	0	0	0	0	0	0	0	0	0	0	0	0	0	0	1	0	0	0	0	0	0
P_4	SAPA_P0260	DBS_20091706.scaffold_scaffold48_orf00012	Micrococcal nuclease-like protein	Plasmid	-	158	-	6088		0	0	0	0	0	0	0	0	0	0	0	0	0	0	0	0	0	0	0	0	0	0	0	0	0	0	0	0	0	0	0	0	0	1	0	0	0	0	0	0
P_4	SAPA_P0261	DBS_20091706.scaffold_scaffold48_orf00011	MobC-like protein	Plasmid	MOBC	250	-	6089		0	0	0	0	0	0	0	0	0	0	0	0	0	0	0	0	0	0	0	0	0	0	0	0	0	0	0	0	0	0	0	0	0	1	0	0	0	0	0	0
P_4	SAPA_P0262	DBS_20091706.scaffold_scaffold48_orf00010	Type IV conjugative transfer system coupling protein TraD	Plasmid	t4cp	579	-	6090		0	0	0	0	0	0	0	0	0	0	0	0	0	0	0	0	0	0	0	0	0	0	0	0	0	0	0	0	0	0	0	0	0	1	0	0	0	0	0	0
P_4	SAPA_P0263	DBS_20091706.scaffold_scaffold48_orf00007	Putative uncharacterized protein	Plasmid	-	102	-	6091		0	0	0	0	0	0	0	0	0	0	0	0	0	0	0	0	0	0	0	0	0	0	0	0	0	0	0	0	0	0	0	0	0	1	0	0	0	0	0	0
P_4	SAPA_P0264	DBS_20091706.scaffold_scaffold48_orf00005	YggA-like protein	Plasmid	-	70	-	6092		0	0	0	0	0	0	0	0	0	0	0	0	0	0	0	0	0	0	0	0	0	0	0	0	0	0	0	0	0	0	0	0	0	1	0	0	0	0	0	0
P_4	SAPA_P0265	DBS_20091706.scaffold_scaffold48_orf00002	P-type DNA transfer ATPase VirB11	Plasmid	T_virB11	342	virB11	6093		0	0	0	0	0	0	0	0	0	0	0	0	0	0	0	0	0	0	0	0	0	0	0	0	0	0	0	0	0	0	0	0	0	1	0	0	0	0	0	0
P_4	SAPA_P0266	DBS_20091706.scaffold_scaffold48_orf00001	Pilx10/VirB10-like protein	Plasmid	T_virB10	137	triI	6094		0	0	0	0	0	0	0	0	0	0	0	0	0	0	0	0	0	0	0	0	0	0	0	0	0	0	0	0	0	0	0	0	0	1	0	0	0	0	0	0
P_5	SAPA_P0267	DBS_20091706.scaffold_C2547_orf00001	Putative uncharacterized protein	Plasmid	-	382	-	6096		0	0	0	0	0	0	0	0	0	0	0	0	0	0	0	0	0	0	0	0	0	1	1	0	0	0	0	0	0	1	1	1	1	1	0	1	0	0	0	0
P_5	SAPA_P0268	DBS_20005023.scaffold_C2325_orf00004	Replicase	Plasmid	-	299	-	6097		0	0	0	0	0	0	0	0	0	0	0	0	0	0	0	0	0	0	0	0	0	1	1	0	0	0	0	0	0	1	1	1	1	1	0	1	0	0	0	0
P_5	SAPA_P0269	DBS_20091706.scaffold_C2547_orf00005	MobD protein	Plasmid	-	79	mobD	6098		0	0	0	0	0	0	0	0	0	0	0	0	0	0	0	0	0	0	0	0	0	1	1	0	0	0	0	0	0	1	1	1	1	1	0	1	0	0	0	0
P_5	SAPA_P0270	DBS_20005023.scaffold_C2325_orf00001	MobB protein	Plasmid	-	162	mobB	6099		0	0	0	0	0	0	0	0	0	0	0	0	0	0	0	0	0	0	0	0	0	1	1	0	0	0	0	0	0	1	1	1	1	1	0	1	0	0	0	0
P_5	SAPA_P0271	DBS_20090595.scaffold_C2562_orf00004	OrfIX	Plasmid	-	233	-	6100		0	0	0	0	0	0	0	0	0	0	0	0	0	0	0	0	0	0	0	0	0	1	1	0	0	0	0	0	0	1	1	1	1	1	0	1	0	0	0	0
P_5	SAPA_P0272	DBS_20005023.scaffold_C2325_orf00006	Mobilization protein	Plasmid	-	109	mbeC	6101		0	0	0	0	0	0	0	0	0	0	0	0	0	0	0	0	0	0	0	0	0	1	1	0	0	0	0	0	0	1	1	1	1	1	0	1	0	0	0	0
P_6	SAPA_P0273	MC_08-0766.scaffold_C2320_orf00002	MobA/MobL family protein	Plasmid	MOBQ	718	-	6103		0	0	0	0	0	0	0	0	1	0	0	0	0	0	0	0	0	0	0	0	0	0	0	0	0	0	0	0	0	0	0	0	0	0	0	0	0	0	0	0
P_6	SAPA_P0274	MC_08-0766.scaffold_C2320_orf00005	Initiator RepB protein	Plasmid	-	186	repB	6104		0	0	0	0	0	0	0	0	1	0	0	0	0	0	0	0	0	0	0	0	0	0	0	0	0	0	0	0	0	0	0	0	0	0	0	0	0	0	0	0
P_6	SAPA_P0275	MC_08-0766.scaffold_C2320_orf00008	Putative mobilization protein C	Plasmid	-	85	mbeC	6105		0	0	0	0	0	0	0	0	1	0	0	0	0	0	0	0	0	0	0	0	0	0	0	0	0	0	0	0	0	0	0	0	0	0	0	0	0	0	0	0
IS	SAPA_I0001	SeAg_B0109	homologous to EryA gene product in L07626	IS	-	402	-			1	1	1	1	1	1	1	1	1	1	1	1	1	1	1	1	1	1	1	1	1	1	1	1	1	1	1	1	1	1	1	1	1	1	1	1	1	1	1	1
IS	SAPA_I0002	SeAg_B0314	transposase IS66	IS	-	95	-			1	1	1	1	1	1	1	1	1	1	1	1	1	1	1	1	1	1	1	1	1	1	1	1	1	1	1	1	1	1	1	1	1	1	1	1	1	1	1	1
IS	SAPA_I0003	SeAg_B0334	TnpA	IS	-	44	-			1	1	1	1	1	1	1	1	1	1	1	1	1	1	1	1	1	1	1	1	1	1	1	1	1	1	1	1	1	1	1	1	1	1	1	1	1	1	1	1
IS	SAPA_I0004	SeAg_B0725	IS3 family transposase B	IS	-	228	-			1	1	1	1	1	1	1	1	1	1	1	1	1	1	1	1	1	1	1	1	1	1	1	1	1	1	1	1	1	1	1	1	1	1	1	1	1	1	1	1
IS	SAPA_I0005	SeAg_B0726	ISPsy11, transposase OrfA	IS	-	134	-			1	1	1	1	1	1	1	1	1	1	1	1	1	1	1	1	1	1	1	1	1	1	1	1	1	1	1	1	1	1	1	1	1	1	1	1	1	1	1	1
IS	SAPA_I0006	SeAg_B0951	transposase for insertion sequence element isrm3	IS	-	66	-			1	1	1	1	1	1	1	1	1	1	1	1	1	1	1	1	1	1	1	1	1	1	1	1	1	1	1	1	1	1	1	1	1	1	1	1	1	1	1	1
IS	SAPA_I0007	SeAg_B0952	transposase for insertion sequence element isrm3	IS	-	169	-			1	1	1	1	1	1	1	1	1	1	1	1	1	1	1	1	1	1	1	1	1	1	1	1	1	1	1	1	1	1	1	1	1	1	1	1	1	1	1	1
IS	SAPA_I0008	SeAg_B1117	IS3 OrfA	IS	-	100	-			1	1	1	1	1	1	1	1	1	1	1	1	1	1	1	1	1	1	1	1	1	1	1	1	1	1	1	1	1	1	1	1	1	1	1	1	1	1	1	1
IS	SAPA_I0009	SeAg_B2060	transposase	IS	-	50	-			1	1	1	1	1	1	1	1	1	1	1	1	1	1	1	1	1	1	1	1	1	1	1	1	1	1	1	1	1	1	1	1	1	1	1	1	1	1	1	1
IS	SAPA_I0010	SeAg_B2061	transposase	IS	-	43	-			1	1	1	1	1	1	1	1	1	1	1	1	1	1	1	1	1	1	1	1	1	1	1	1	1	1	1	1	1	1	1	1	1	1	1	1	1	1	1	1
IS	SAPA_I0011	SeAg_B2062	transposase for insertion sequence element A	IS	-	297	-			1	1	1	1	1	1	1	1	1	1	1	1	1	1	1	1	1	1	1	1	1	1	1	1	1	1	1	1	1	1	1	1	1	1	1	1	1	1	1	1
IS	SAPA_I0012	SeAg_B2106	transposase	IS	-	52	-			1	1	1	1	1	1	1	1	1	1	1	1	1	1	1	1	1	1	1	1	1	1	1	1	1	1	1	1	1	1	1	1	1	1	1	1	1	1	1	1
IS	SAPA_I0013	SeAg_B2654	putative transposase B	IS	-	118	-			1	1	1	1	1	1	1	1	1	1	1	1	1	1	1	1	1	1	1	1	1	1	1	1	1	1	1	1	1	1	1	1	1	1	1	1	1	1	1	1
IS	SAPA_I0014	SeAg_B3867	transposase, IS3 family	IS	-	45	-			1	1	1	1	1	1	1	1	1	1	1	1	1	1	1	1	1	1	1	1	1	1	1	1	1	1	1	1	1	1	1	1	1	1	1	1	1	1	1	1
IS	SAPA_I0015	SeAg_B3978	transposase Tpase	IS	-	83	-			1	1	1	1	1	1	1	1	1	1	1	1	1	1	1	1	1	1	1	1	1	1	1	1	1	1	1	1	1	1	1	1	1	1	1	1	1	1	1	1
IS	SAPA_I0016	SeAg_B4578	transposase InsF for insertion sequence IS3A/B/C/D/E/fA	IS	-	69	-			1	1	1	1	1	1	1	1	1	1	1	1	1	1	1	1	1	1	1	1	1	1	1	1	1	1	1	1	1	1	1	1	1	1	1	1	1	1	1	1
IS	SAPA_I0017	SeAg_B4579	transposase InsF for insertion sequence IS3A/B/C/D/E/fA	IS	-	72	-			1	1	1	1	1	1	1	1	1	1	1	1	1	1	1	1	1	1	1	1	1	1	1	1	1	1	1	1	1	1	1	1	1	1	1	1	1	1	1	1
IS	SAPA_I0018	SeAg_B4587	conserved hypothetical protein	IS	-	115	-			1	1	1	1	1	1	1	1	1	1	1	1	1	1	1	1	1	1	1	1	1	1	1	1	1	1	1	1	1	1	1	1	1	1	1	1	1	1	1	1
IS	SAPA_I0019	SeAg_B4791	truncated transposase	IS	-	167	-			1	1	1	1	1	1	1	1	1	1	1	1	1	1	1	1	1	1	1	1	1	1	1	1	1	1	1	1	1	1	1	1	1	1	1	1	1	1	1	1
IS	SAPA_I0020	SeAg_B4807	transposase subfamily	IS	-	89	-			1	1	1	1	1	1	1	1	1	1	1	1	1	1	1	1	1	1	1	1	1	1	1	1	1	1	1	1	1	1	1	1	1	1	1	1	1	1	1	1
IS	SAPA_I0021	SeAg_B4808	transposase B	IS	-	208	-			1	1	1	1	1	1	1	1	1	1	1	1	1	1	1	1	1	1	1	1	1	1	1	1	1	1	1	1	1	1	1	1	1	1	1	1	1	1	1	1
IS	SAPA_I0022	SeAg_B3026	probable transposase for transposon	IS	-	16	-	3565		1	1	1	1	1	1	1	1	1	1	1	1	1	1	1	1	1	1	1	1	1	1	1	1	1	1	1	1	1	1	1	1	1	1	1	1	1	1	0	1
IS	SAPA_I0023	SeAg_B0337	IS10 transposase	IS	-	134	-			0	0	0	0	0	0	0	0	0	0	0	0	0	0	0	0	0	0	0	0	0	0	0	0	1	1	1	1	1	0	0	0	0	0	0	0	0	0	0	0
IS	SAPA_I0024	0703S19930_111212_1.remap_scaffold47_orf00078	Transposase, putative	IS	-	344	-	4835		0	0	0	0	0	0	0	0	0	0	0	0	0	0	0	0	0	1	0	0	0	0	0	0	0	0	0	0	0	0	0	0	0	0	0	0	0	0	0	0
IS	SAPA_I0025	CS_NB04.055_111212_1.remap_C2598_orf00004	Transposase ISCR3	IS	-	373	insE	4868		0	0	0	0	0	0	0	0	0	0	0	0	0	0	0	0	0	0	0	0	0	0	0	1	0	0	0	0	0	0	0	0	0	0	0	0	0	0	0	0
IS	SAPA_I0026	DBS_20001356.scaffold_scaffold49_orf00115	Probable transposase for transposon Tn903	IS	-	308	-			0	0	0	0	0	0	0	0	0	0	0	0	0	0	0	0	0	0	0	1	0	0	0	0	0	0	0	0	0	0	0	0	0	0	0	0	0	0	0	0
IS	SAPA_I0027	DBS_20090461.scaffold_scaffold5_orf00002	Replication protein	IS	-	326	-			0	0	0	0	0	0	0	0	0	0	0	0	0	0	0	0	0	0	0	0	0	0	0	0	0	0	0	0	0	0	0	0	0	1	0	0	0	0	0	0
IS	SAPA_I0028	DBS_20091706.scaffold_scaffold29_orf00210	DNA-invertase hin	IS	-	194	-	2717		0	0	0	0	0	0	0	0	0	0	0	0	0	0	0	0	0	0	0	0	0	0	0	0	0	0	0	0	0	0	0	0	0	1	0	0	0	0	0	0
IS	SAPA_I0029	DBS_20091706.scaffold_scaffold48_orf00017	Transposase for transposon Tn2501	IS	-	995	-	6085		0	0	0	0	0	0	0	0	0	0	0	0	0	0	0	0	0	0	0	0	0	0	0	0	0	0	0	0	0	0	0	0	0	1	0	0	0	0	0	0
IS	SAPA_I0030	DBS_20091706.scaffold_scaffold48_orf00018	Resolvase, N-terminal domain	IS	-	136	-	6084		0	0	0	0	0	0	0	0	0	0	0	0	0	0	0	0	0	0	0	0	0	0	0	0	0	0	0	0	0	0	0	0	0	1	0	0	0	0	0	0
IS	SAPA_I0031	MC_04-0873.scaffold_scaffold27_orf00063	ISCro1 transposase A	IS	-	102	-	423		0	0	0	0	0	0	0	0	0	0	0	0	1	1	0	0	0	0	0	0	0	0	0	0	0	0	0	0	0	1	0	0	0	0	0	0	0	0	0	0
IS	SAPA_I0032	MC_05-0677.scaffold_scaffold25_orf00095	ISCro1 transposase B	IS	-	116	-	424		0	0	0	0	0	0	0	0	0	0	0	0	1	1	0	0	0	0	0	0	0	0	0	0	0	0	0	0	0	1	0	0	0	0	0	0	0	0	0	0
IS	SAPA_I0033	MC_05-0784.scaffold_C2579_orf00011	DNA invertase from prophage CP-933H	IS	-	186	-	3346		1	1	1	1	1	1	1	1	1	1	1	1	1	1	0	0	0	0	0	0	0	0	1	0	0	0	0	0	0	0	0	0	0	0	0	1	0	0	0	1
IS	SAPA_I0034	MC_05-0784.scaffold_scaffold21_orf00003	IS26 transposase protein	IS	-	235	insB4	6058		0	1	1	0	0	1	1	1	0	0	0	0	0	0	0	0	0	0	0	0	0	0	0	0	0	0	0	0	0	0	0	1	0	0	0	0	0	0	0	0
IS	SAPA_I0035	MC_05-0784.scaffold_scaffold21_orf00098	Transposase InsD for insertion sequence IS1133	IS	-	265	-	5976		0	1	1	0	0	1	1	1	0	0	0	0	0	0	0	0	0	0	0	0	0	0	0	0	0	0	0	0	0	0	0	0	0	0	0	0	0	0	0	0
IS	SAPA_I0036	MC_05-0784.scaffold_scaffold21_orf00101	Beta-lactamase TEM	IS	-	287	bla	5974		0	1	1	0	0	1	1	1	0	0	0	0	0	0	0	0	0	0	0	0	0	0	0	0	0	0	0	0	0	0	0	0	0	0	0	0	0	0	0	0
IS	SAPA_I0037	MC_05-0784.scaffold_scaffold21_orf00103	Resolvase TnpR	IS	-	134	-	5973		0	1	1	0	0	1	1	1	0	0	0	0	0	0	0	0	0	0	0	0	0	0	0	0	0	0	0	0	0	0	0	0	0	0	0	0	0	0	0	0
IS	SAPA_I0038	MC_05-0784.scaffold_scaffold21_orf00104	Transposase for transposon Tn3	IS	-	1002	-	5972		0	1	1	0	0	1	1	1	0	0	0	0	0	0	0	0	0	0	0	0	0	0	0	0	0	0	0	0	0	0	0	0	0	0	0	0	0	0	0	0
IS	SAPA_I0039	MC_05-0828.scaffold_C3005_orf00024	ISCro1 transposase C	IS	-	524	-	425		0	0	0	0	0	0	0	0	0	0	0	0	1	1	0	0	0	0	0	0	0	0	0	0	0	0	0	0	0	1	0	0	0	0	0	0	0	0	0	0
IS	SAPA_I0040	MC_08-0532.scaffold_scaffold16_orf00013	Putative transposase B domain protein	IS	-	71	-	5915		0	0	0	0	0	0	0	0	0	0	0	0	0	0	0	0	0	0	0	1	0	0	0	0	0	0	0	0	0	0	0	0	0	0	0	0	0	0	0	0
IS	SAPA_I0041	MC_08-0532.scaffold_scaffold16_orf00014	transposase of ISEc21	IS	-	359	-	5916		0	0	0	0	0	0	0	0	0	0	0	0	0	0	0	0	0	0	0	1	0	0	0	0	0	0	0	0	0	0	0	0	0	0	0	0	0	0	0	0
IS	SAPA_I0042	MC_08-0532.scaffold_scaffold16_orf00016	ISEc14 transposase A	IS	-	95	-	5918		0	0	0	0	0	0	0	0	0	0	0	0	0	0	0	0	0	0	0	1	0	0	0	0	0	0	0	0	0	0	0	0	0	0	0	0	0	0	0	0
IS	SAPA_I0043	MC_08-0532.scaffold_scaffold22_orf00012	IS1 transposase	IS	-	132	-	5901		0	0	0	0	0	0	0	0	0	0	0	0	0	0	0	0	0	0	0	1	0	0	0	0	0	0	0	0	0	0	0	0	0	0	0	0	0	0	0	0
IS	SAPA_I0044	MC_08-0532.scaffold_scaffold22_orf00013	IS1, transposase orfA	IS	-	91	-	5900		0	0	0	0	0	0	0	0	0	0	0	0	0	0	0	0	0	0	0	1	0	0	0	0	0	0	0	0	0	0	0	0	0	0	0	0	0	0	0	0
IS	SAPA_I0045	MC_08-0532.scaffold_scaffold22_orf00016	transposase and inactivated derivatives	IS	-	92	insA			0	0	0	0	0	0	0	0	0	0	0	0	0	0	0	0	0	0	0	1	1	0	0	0	0	0	0	0	0	0	0	0	0	0	0	0	0	0	0	0
IS	SAPA_I0046	MC_08-0532.scaffold_scaffold22_orf00034	IS5 transposase and trans-activator	IS	-	357	-			0	0	0	0	0	0	0	0	0	0	0	0	0	0	0	0	0	0	0	1	1	0	0	0	0	0	0	0	0	0	0	0	0	0	0	0	0	0	0	0
IS	SAPA_I0047	MC_08-0532.scaffold_scaffold3_orf00007	transposase, Tn3 family	IS	-	69	tnpA1	5884		0	0	0	0	0	0	0	0	0	0	0	0	0	0	0	0	0	0	0	1	0	0	0	0	0	0	0	0	0	0	0	0	0	0	0	0	0	0	0	0
IS	SAPA_I0048	MC_09-0426.scaffold_scaffold51_orf00050	Transposase domain protein	IS	-	478	-	4854		0	0	0	0	0	0	0	0	0	0	0	0	0	0	0	0	0	0	0	0	0	0	0	0	0	0	0	0	0	0	0	0	0	0	0	0	0	0	0	0
IS	SAPA_I0049	MC_09-0426.scaffold_scaffold51_orf00054	ISPsy20, transposase IstB	IS	-	261	istB	4860		0	0	0	0	0	0	0	0	0	0	0	0	0	0	0	0	0	0	0	0	0	0	0	0	0	0	0	0	0	0	0	0	0	0	0	0	0	0	0	0
IS	SAPA_I0050	MC_09-0426.scaffold_scaffold51_orf00056	Transposase for insertion sequences IS1326/IS1353	IS	-	505	istA	4861		0	0	0	0	0	0	0	0	0	0	0	0	0	0	0	0	0	0	0	0	0	0	0	0	0	0	0	0	0	0	0	0	0	0	0	0	0	0	0	0
IS	SAPA_I0051	t2667	putative DNA-invertase	IS	-	190	-	3347		0	0	0	0	0	0	0	0	0	0	0	0	0	0	0	1	1	1	1	0	0	0	0	0	0	0	0	0	0	0	0	0	0	0	0	1	1	1	0	0
IS	SAPA_I0052	WR-00-06755_111212_4.remap_scaffold31_orf00041	Transposase family	IS	-	119	-	6037		0	0	0	0	0	0	0	0	0	0	0	0	0	0	0	0	0	0	0	0	0	0	0	0	0	0	0	0	0	0	0	1	0	0	0	0	0	0	0	0
IS	SAPA_I0053	WR-00-06755_111212_4.remap_scaffold31_orf00042	transposase	IS	-	117	-	6036		0	0	0	0	0	0	0	0	0	0	0	0	0	0	0	0	0	0	0	0	0	0	0	0	0	0	0	0	0	0	0	1	0	0	0	0	0	0	0	0
IS	SAPA_I0054	WR-00-06755_111212_4.remap_scaffold31_orf00044	IS66 family element, transposase	IS	-	531	-	6035		0	0	0	0	0	0	0	0	0	0	0	0	0	0	0	0	0	0	0	0	0	0	0	0	0	0	0	0	0	0	0	1	0	0	0	0	0	0	0	0
IS	SAPA_I0055	WR-00-06755_111212_4.remap_scaffold52_orf00038	Transposase for transposon Tn21	IS	-	989	-	5989		0	0	0	0	0	0	0	0	0	0	0	0	0	0	0	0	0	0	0	0	0	0	0	0	0	0	0	0	0	1	0	1	0	0	0	0	0	0	0	0
IS	SAPA_I0056	WS1033.scaffold_scaffold3_orf00309	IS1 transposase InsAB'	IS	-	99	insB			0	0	0	0	0	0	0	0	0	0	0	0	0	0	0	0	0	0	0	1	1	0	0	0	0	0	0	0	0	0	0	0	0	0	0	0	0	0	0	0
IS	SAPA_I0057	WS1033.scaffold_scaffold3_orf00323	Transposase IS66 family protein	IS	-	519	-	3893		0	0	0	0	0	0	0	0	0	0	0	0	0	0	0	0	0	0	0	0	0	0	0	0	0	0	0	0	0	0	0	0	0	0	0	0	0	0	0	0
IS	SAPA_I0058	WS1033.scaffold_scaffold3_orf00324	Putative transposase	IS	-	116	-	3894		0	0	0	0	0	0	0	0	0	0	0	0	0	0	0	0	0	0	0	0	0	0	0	0	0	0	0	0	0	0	0	0	0	0	0	0	0	0	0	0
IS	SAPA_I0059	WS1035.scaffold_scaffold93_orf00001	transposase for insertion sequence	IS	-	248	-			0	0	0	0	0	0	0	0	0	0	0	0	0	0	0	0	0	0	0	0	0	0	0	0	0	0	0	0	0	0	0	0	0	0	0	0	0	0	0	0
					Total Length (a.a.)	424242
					Total Length (bp)	1272726
Note: * Green cells represent paralogs in other genomic islands or plasmids.
Type - Whether a gene is part of plasmid, insertion sequence (IS), phage, integrated mobile element (IME) or integrated conjugative element (ICE)
Conjugative element - genes predicted to be part of conjugative systems based on Guglielmini et al.
Each gene of the accessory genome is listed only once, even when it is present in multiple related elements. For example, GI1 was present as variants A to H in different isolates (Dataset S1)
[truncated: 33 more columns]
