# Supplementary material for: Neutral Genomic Microevolution of a Recently Emerged Pathogen, Salmonella enterica Serovar Agona
Source: PLOS journal article supplement (doi:10.1371/journal.pgen.1003471), 2013-04-18

# Reconstruction of genomic islands and gap filling

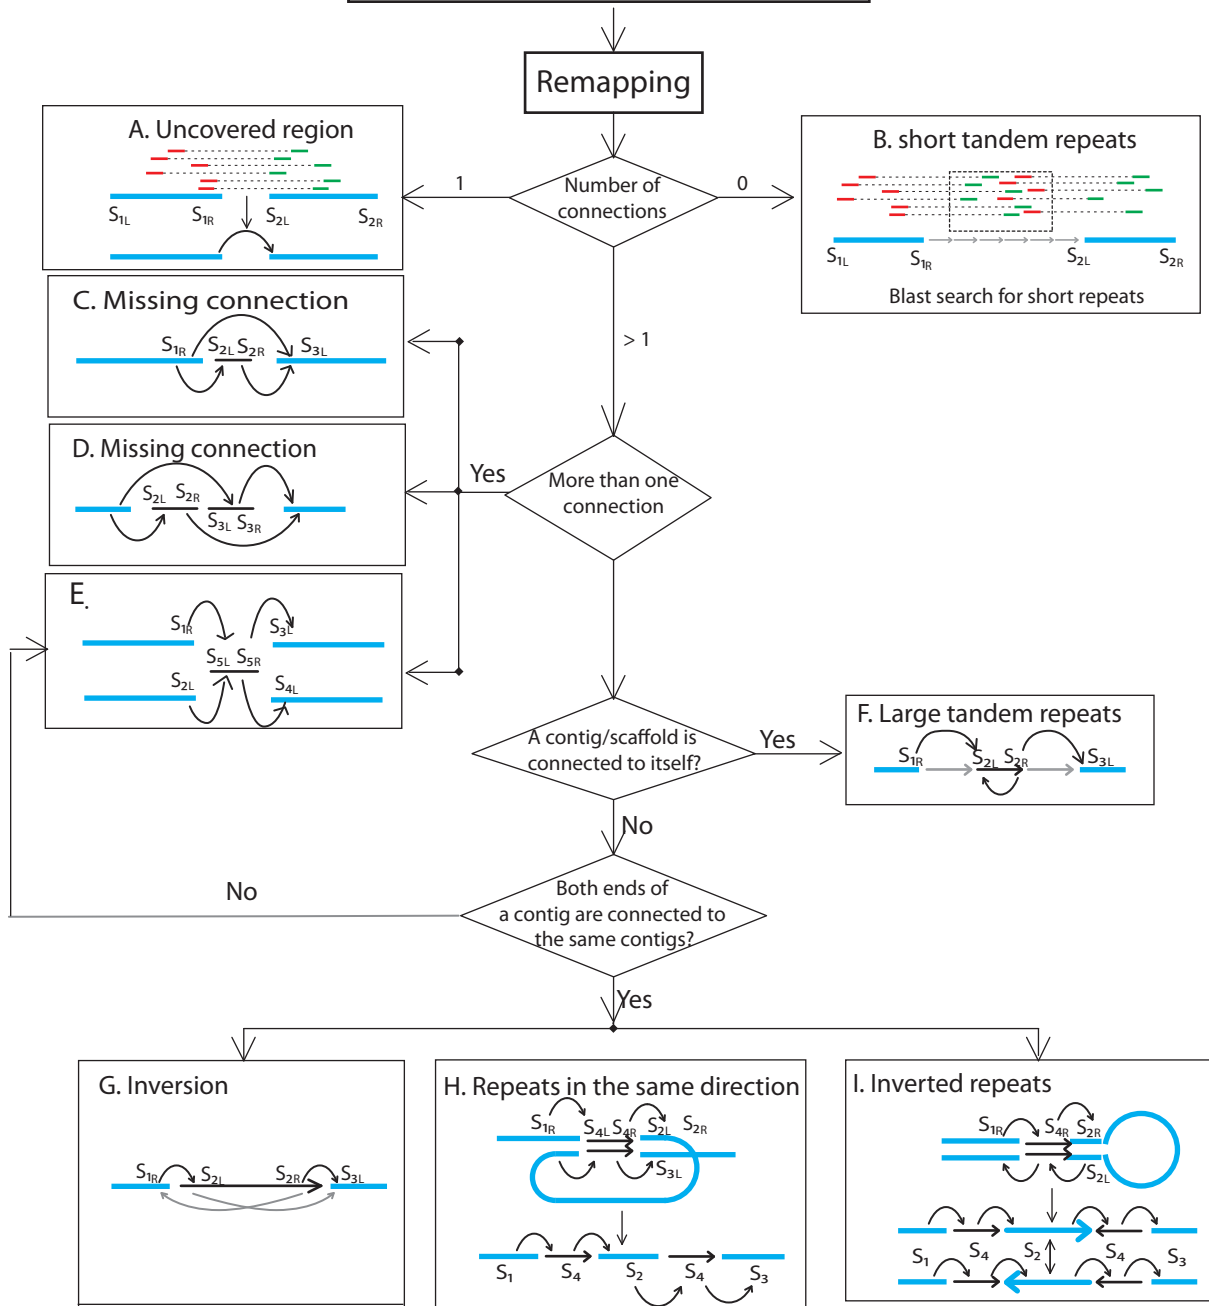

Supplement: S19 (10.1371/journal.pgen.1003471.s019) [file journal.pgen.1003471.s019]
